# Supplementary material for: Inhibition of Rho Kinase by Fasudil Ameliorates Cognition Impairment in APP/PS1 Transgenic Mice via Modulation of Gut Microbiota and Metabolites
Source: Front Aging Neurosci. 2021 Oct 14;13:755164. doi: 10.3389/fnagi.2021.755164 (PMC8551711; doi:10.3389/fnagi.2021.755164)
Supplement: Supplementary Table 3 — Level of species in all groups file. [file Table_3.XLSX]

## Sheet: w
	WT_1	WT_2	WT_3	WT_4	WT_5	ADF_1	ADF_2	ADF_3	ADF_4	ADF_5	ADNS_1	ADNS_2	ADNS_3	ADNS_4	ADNS_5
s__Erythrobacter_sp_AP23	2.36e-07	2.34e-07	3.15e-07	4.59e-07	1.15e-07	1.61e-07	1.6e-07	2.27e-08	2.02e-07	2.01e-07	1.21e-07	2.05e-07	1.52e-07	1.22e-07	1.93e-07
s__Sinorhizobium_sp_PC2	9.83e-08	8.51e-08	2.25e-08	0	4.59e-08	0	0	4.54e-08	5.04e-08	0	0	0	0	0	4.83e-08
s__Trypanosoma_vivax	0	0	9.01e-08	0	2.29e-08	2.69e-08	0	0	0	0	0	4.11e-08	0	7.33e-08	0
s__Escherichia_phage_slur05	0	0	0	0	2.29e-08	2.69e-08	0	0	0	0	0	0	0	0	0
s__Taphrina_deformans	1.97e-08	0	4.5e-08	1.99e-08	0	0	0	0	5.04e-08	0	0	2.05e-08	0	7.33e-08	0
s__bacterium_F083	0.00036399	0.000282722	0.000331082	0.000216906	0.000480541	0.000227915	0.000361593	0.000235978	0.000264845	0.000326427	0.000238301	0.000198189	0.000267075	0.000189663	0.000250663
s__Aneurinibacillus_terranovensis	2.67e-06	2.02e-06	2.23e-06	5.39e-06	2.73e-06	3.01e-06	2.63e-06	3.11e-06	3.53e-06	1.84e-06	6.97e-06	3.88e-06	2.17e-06	5.04e-06	3.5e-06
s__Pseudomonas_phage_UFV-P2	0	0	0	0	0	0	0	0	0	0	0	0	0	2.44e-08	0
s__uncultured_bacterium_Contig16	5.9e-07	4.04e-07	2.03e-07	9.37e-06	9.4e-07	1.88e-07	4.35e-07	4.31e-07	8.57e-07	9.06e-07	2.24e-06	1.19e-06	6.57e-07	4.64e-07	3.12e-06
s__uncultured_bacterium_CSLF42	1.97e-08	2.13e-08	2.25e-08	0	0	0	0	0	0	0	0	2.05e-08	0	0	0
s__Eggerthella_sp_CAG209	9.73e-06	5.7e-06	1.4e-05	1.24e-05	1.08e-05	1.56e-05	1.69e-05	2.27e-05	1.37e-05	1.12e-05	1.06e-05	1.41e-05	1.46e-05	4.19e-05	1.2e-05
s__Psychrobacter_glacincola	5.96e-06	1.06e-07	4.44e-06	4.19e-07	1.52e-05	1.88e-07	4.12e-07	2.04e-07	1.76e-07	1.01e-07	2.17e-07	1.03e-07	4.55e-07	4.16e-07	2.42e-07
s__Clostridium_sporogenes	1.95e-05	8.57e-06	9.37e-06	2.83e-05	1.68e-05	2.53e-05	1.32e-05	2.55e-05	3.4e-05	1.32e-05	3.19e-05	1.95e-05	1.27e-05	3e-05	2.69e-05
s__Arachis_diogoi	2.91e-06	1.15e-06	8.31e-06	2.99e-06	3.83e-06	2.42e-05	2.77e-06	2.4e-05	1.87e-05	1.06e-05	9.76e-06	1.32e-05	2.91e-06	9.41e-06	9.26e-06
s__Alcanivorax_sp_HI0035	1.97e-08	2.13e-08	4.5e-08	1.99e-08	0	0	2.29e-08	0	0	0	0	0	2.53e-08	0	0
s__uncultured_bacterium_Contig1578	2.36e-07	0	6.75e-08	4.79e-07	2.75e-07	4.03e-07	1.6e-07	3.4e-07	1.51e-07	5.03e-08	4.34e-07	6.78e-07	5.31e-07	7.82e-07	1.21e-07
s__Serratia_rubidaea	8.45e-07	9.57e-07	8.11e-07	1.22e-06	7.11e-07	6.99e-07	1.88e-06	1.02e-06	8.57e-07	1.11e-06	8.68e-07	7.4e-07	1.11e-06	6.11e-07	1.09e-06
s__uncultured_archaeon_GZfos35B7	0	0	0	0	0	0	0	0	2.52e-08	0	0	0	0	0	0
s__Corallorhiza_maculata	0	0	0	0	0	2.69e-08	0	0	0	0	0	0	0	0	0
s__Candidatus_Peregrinibacteria_bacterium_GW2011_GWE2_39_6	7.86e-07	6.38e-08	1.35e-07	3.99e-08	0	3.23e-07	4.12e-07	1.13e-07	7.81e-07	4.78e-07	7.23e-08	6.16e-08	1.26e-07	0	7.25e-08
s__Vibrio_sp_JCM_18905	0	0	0	1.99e-08	2.29e-08	0	0	0	7.56e-08	2.52e-08	2.41e-08	0	0	0	0
s__Caulobacteraceae_bacterium_PMMR1	2.75e-07	2.98e-07	3.15e-07	3.19e-07	2.29e-07	4.84e-07	1.37e-07	2.49e-07	4.03e-07	3.27e-07	2.65e-07	3.08e-07	3.54e-07	3.18e-07	2.42e-07
s__Bifidobacterium_magnum	8.47e-06	3.62e-06	6.01e-06	7.34e-06	7.93e-06	1.63e-05	1.02e-05	2.1e-05	1.07e-05	1.83e-05	1.3e-05	1.5e-05	1.13e-05	2.68e-05	7.73e-06
s__Chryseobacterium_aquaticum	7.55e-06	7.74e-06	5.34e-06	5.35e-06	6.65e-06	6.96e-06	7.28e-06	6.12e-06	6.07e-06	6.49e-06	4.63e-06	6.68e-06	5.94e-06	4.67e-06	4.64e-06
s__Rubrivivax_benzoatilyticus	6.68e-07	7.44e-07	1.55e-06	1.62e-06	5.04e-07	2.28e-06	4.81e-07	9.98e-07	1.61e-06	1.66e-06	6.03e-07	8.63e-07	6.57e-07	8.56e-07	9.91e-07
s__Nonlabens_virus_P12024S	3.93e-08	1.49e-07	4.5e-08	0	0	1.08e-07	0	2.27e-07	5.04e-08	5.03e-08	0	4.11e-08	2.53e-08	1.22e-07	0
s__Nocardia_africana	3.54e-07	4.25e-08	1.8e-07	2.39e-07	1.38e-07	2.42e-07	2.06e-07	1.36e-07	2.77e-07	3.78e-07	4.58e-07	1.85e-07	3.54e-07	1.96e-07	2.18e-07
s__Methylomicrobium_agile	3.13e-06	3.87e-06	3.78e-06	3.11e-06	1.99e-06	3.31e-06	3.3e-06	2.02e-06	1.66e-06	3.15e-06	3.3e-06	2.05e-06	4.07e-06	3.03e-06	3.48e-06
s__Porphyromonas_sp_COT-239_OH1446	0.000218099	0.000195479	0.00023456	0.000194348	0.000191473	0.000187998	0.000198486	0.000175373	0.000170382	0.000237886	0.000156593	0.000158005	0.000227806	0.000129481	0.000173707
s__Erythrobacter_sp_HI0038	0	0	0	0	0	0	0	0	0	0	0	2.05e-08	0	0	0
s__Aotus_nancymaae	1.97e-08	0	0	0	2.29e-08	1.08e-07	1.83e-07	0	0	0	4.82e-08	1.03e-07	5.05e-08	4.89e-08	4.83e-08
s__Olleya_sp_ITB9	5.05e-06	5.21e-06	4.46e-06	3.99e-06	2.36e-06	5e-06	3.76e-06	7.48e-06	5.17e-06	4.53e-06	4.24e-06	5.36e-06	6.92e-06	3.47e-06	7.3e-06
s__Leptolyngbya_sp_PCC_6406	1.3e-06	6.81e-07	9.23e-07	5.39e-07	4.59e-07	1.83e-06	7.33e-07	2.65e-06	1.84e-06	4.78e-07	1.25e-06	2.01e-06	3.18e-06	1.17e-06	2.15e-06
s__Halomonas_desiderata	0	0	0	0	0	0	0	0	0	0	0	0	0	0	0
s__Streptomyces_sclerotialus	3.34e-07	1.06e-07	2.03e-07	9.97e-08	6.88e-08	3.49e-07	4.58e-08	8.85e-07	6.3e-07	7.55e-08	1.93e-07	6.98e-07	3.29e-07	5.38e-07	1.06e-06
s__Drosophila_ananassae	0	0	0	3.99e-08	4.59e-08	5.38e-08	1.14e-07	0	0	2.52e-08	2.41e-08	0	2.53e-08	2.44e-08	1.21e-07
s__Acinetobacter_sp_CIP_102637	3.93e-08	1.49e-07	6.75e-08	0	0	0	0	0	5.04e-08	0	4.82e-08	1.03e-07	0	0	4.83e-08
s__Helicobacter_apodemus	2.58e-06	3.38e-06	1.91e-06	1.08e-06	9.79e-06	5.4e-06	5.45e-06	4.4e-06	2.12e-05	1.1e-05	2.06e-05	7.58e-06	5.53e-06	4.37e-05	2.43e-05
s__Chryseobacterium_haifense	6.51e-06	7.89e-06	5.43e-06	4.97e-06	7.64e-06	5.81e-06	6.87e-06	4.4e-06	5.11e-06	4.71e-06	4.65e-06	5.46e-06	4.35e-06	3.03e-06	4.59e-06
s__Shewanella_algae	1.75e-06	1.17e-06	9.23e-07	1.08e-06	1.86e-06	1.08e-06	1.83e-06	1.22e-06	1.18e-06	1.36e-06	8.19e-07	9.86e-07	9.1e-07	1.3e-06	1.09e-06
s__Desulfotomaculum_copahuensis	2.36e-06	2.62e-06	1.42e-06	3.91e-06	1.61e-06	2.18e-06	3.76e-06	1.86e-06	3.12e-06	1.36e-06	4.19e-06	2.38e-06	2.98e-06	4.01e-06	2.8e-06
s__Pyrococcus_abyssi	1.77e-07	1.7e-07	2.48e-07	1.8e-07	1.15e-07	2.69e-07	3.43e-07	2.95e-07	5.29e-07	1.26e-07	5.54e-07	3.29e-07	3.79e-07	3.91e-07	6.04e-07
s__Sus_scrofa	1.38e-07	8.51e-08	6.75e-08	1.99e-08	0	2.42e-07	9.16e-08	9.07e-08	2.52e-08	1.26e-07	7.23e-08	2.05e-08	0	0	1.69e-07
s__Leucobacter_chironomi	1.18e-06	1.15e-06	6.98e-07	1.46e-06	2.98e-07	1.13e-06	1.4e-06	6.35e-07	3.78e-07	6.8e-07	4.58e-07	4.31e-07	2.05e-06	1.32e-06	8.22e-07
s__Mouse_mammary_tumor_virus	1.97e-08	0	0	0	0	5.38e-08	2.29e-08	0	0	7.55e-08	0	2.05e-08	0	0	0
s__Enterobacter_sp_UCD-UG_FMILLET	1.77e-07	6.38e-08	2.25e-08	0	1.61e-07	8.06e-08	3.66e-07	0	0	1.26e-07	1.21e-07	2.05e-08	7.58e-08	2.44e-08	4.83e-08
s__Streptomyces_sp_XY152	0	0	0	0	4.59e-08	0	0	0	0	2.52e-08	0	0	0	0	0
s__Halanaerobium_hydrogeniformans	2.65e-06	1.64e-06	1.94e-06	2.71e-06	1.61e-06	1.29e-06	2.36e-06	1.79e-06	2.8e-06	1.26e-06	2.12e-06	3.92e-06	2.43e-06	2.4e-06	1.38e-06
s__Paenibacillus_sp_O199	7.47e-07	5.74e-07	4.28e-07	9.17e-07	6.19e-07	2.07e-06	1.01e-06	1.75e-06	2.67e-06	3.02e-07	9.88e-07	2.63e-06	4.55e-07	2.22e-06	9.67e-07
s__Candidatus_Gottesmanbacteria_bacterium_GW2011_GWA2_44_17	7.86e-08	4.25e-08	2.25e-08	5.98e-08	4.59e-08	0	1.14e-07	6.8e-08	0	1.01e-07	0	1.03e-07	1.01e-07	4.89e-08	0
s__Streptomyces_sp_FXJ7388	0	0	0	0	2.29e-08	0	0	0	0	0	0	0	0	0	0
s__Phyllobacterium_sp_YR531	4.33e-07	2.13e-07	6.08e-07	9.17e-07	6.88e-08	2.15e-07	5.95e-07	7.71e-07	2.77e-07	6.29e-07	4.58e-07	6.16e-07	3.79e-07	2.69e-07	2.42e-07
s__Wallemia_ichthyophaga	7.86e-08	3.19e-07	4.5e-08	2.79e-07	2.29e-08	1.88e-07	2.52e-07	2.27e-07	5.04e-08	1.76e-07	2.17e-07	1.23e-07	3.79e-07	1.96e-07	2.9e-07
s__Mesorhizobium_sp_1M-11	2.95e-07	2.34e-07	2.48e-07	2.99e-07	4.13e-07	4.84e-07	4.58e-07	3.18e-07	3.02e-07	3.02e-07	7.23e-07	2.47e-07	3.54e-07	4.16e-07	5.56e-07
s__Mycoplasma_primatum	3.93e-07	1.45e-06	1.8e-07	5.58e-07	4.36e-07	5.91e-07	5.72e-07	7.71e-07	2.02e-07	5.79e-07	2.89e-07	3.9e-07	5.05e-08	2.93e-07	4.83e-08
s__Bifidobacterium_longum_subsp_longum	4.66e-06	4.79e-06	4.84e-06	7.98e-06	1.43e-05	6.18e-05	5.2e-06	6.55e-06	4.43e-06	4.06e-05	6.46e-05	7.61e-05	1.85e-05	3.31e-05	7.28e-06
s__Phycisphaerae_bacterium_SM1_79	1.22e-06	7.23e-07	5.4e-07	1.06e-06	9.63e-07	1.21e-06	2.08e-06	1.63e-06	1.99e-06	7.05e-07	9.64e-07	1.38e-06	8.59e-07	1.15e-06	1.72e-06
s__uncultured_Gordonibacter_sp	1.97e-08	4.25e-08	0	1.99e-08	0	0	1.37e-07	0	2.52e-08	2.52e-08	2.41e-08	2.05e-08	5.05e-08	1.96e-07	0
s__Prochlorococcus_sp_scB245a_519B7	0	0	2.25e-08	0	0	0	4.58e-08	0	2.52e-08	0	0	2.05e-08	0	2.44e-08	0
s__Wolbachia_endosymbiont_of_Onchocerca_ochengi	9.83e-08	1.7e-07	1.8e-07	4.19e-07	4.13e-07	5.38e-08	3.21e-07	6.8e-08	2.52e-07	1.26e-07	1.45e-07	8.22e-08	1.77e-07	7.33e-08	1.21e-07
s__Bacillus_subtilis_subsp_inaquosorum	5.9e-08	1.7e-07	4.5e-08	9.97e-08	9.17e-08	2.69e-08	4.58e-08	1.36e-07	5.04e-08	5.03e-08	1.93e-07	6.16e-08	2.53e-08	1.71e-07	4.35e-07
s__Parvibaculum_lavamentivorans	1.75e-06	7.66e-07	7.43e-07	8.58e-07	8.71e-07	1.72e-06	1.01e-06	2.04e-06	2.29e-06	5.54e-07	1.21e-06	2.86e-06	2.05e-06	1.66e-06	2.37e-06
s__Gulbenkiania_mobilis	1.26e-06	1.36e-06	1.51e-06	1.68e-06	1.63e-06	1.53e-06	9.62e-07	5.9e-07	9.32e-07	2.24e-06	1.49e-06	1.21e-06	2e-06	1e-06	1.14e-06
s__Novosphingobium_lindaniclasticum	7.47e-07	2.13e-07	4.28e-07	1.4e-07	1.22e-06	5.91e-07	1.17e-06	3.86e-07	6.05e-07	6.29e-07	1.69e-07	9.86e-07	7.33e-07	3.91e-07	5.32e-07
s__Oribacterium_sp_oral_taxon_108	6.29e-06	4.49e-06	6.21e-06	1.09e-05	8.78e-06	6.4e-06	1e-05	4.81e-06	8.19e-06	5.36e-06	1.16e-05	5.75e-06	5.18e-06	1.61e-05	1.45e-05
s__Lactobacillus_brevis	1.07e-05	3.98e-06	2.73e-05	6.62e-06	1.27e-05	1.55e-05	8.79e-06	9.32e-06	8.94e-06	6.97e-06	1.56e-05	1.3e-05	8.67e-06	8.46e-06	8.94e-06
s__Lagierella_massiliensis	1.67e-06	1.94e-06	1.15e-06	3.19e-06	2.29e-06	1.77e-06	2.5e-06	2.15e-06	2.72e-06	1.23e-06	2.72e-06	1.83e-06	2e-06	3.76e-06	2.47e-06
s__Bacillus_sp_L_1B0_8	9.83e-08	0	0	1.99e-08	0	0	0	4.54e-08	0	0	0	0	0	0	2.42e-08
s__Streptomyces_sp_CNH099	3.15e-07	1.06e-07	2.93e-07	2.59e-07	1.38e-07	1.08e-07	5.27e-07	5.9e-07	2.27e-07	1.51e-07	1.45e-07	3.29e-07	1.26e-07	3.18e-07	2.18e-07
s__Methylobacterium_sp_Leaf100	1.08e-06	3.62e-07	1.04e-06	9.57e-07	1.74e-06	1.88e-07	7.33e-07	3.4e-07	5.04e-07	7.05e-07	6.75e-07	2.05e-07	2.27e-07	3.67e-07	5.32e-07
s__Candidatus_Gottesmanbacteria_bacterium_GW2011_GWC2_42_8	1.97e-08	1.28e-07	1.8e-07	1.6e-07	1.83e-07	5.38e-08	1.83e-07	9.07e-08	2.02e-07	7.55e-08	7.23e-08	8.22e-08	1.01e-07	1.96e-07	7.25e-08
s__Campylobacter_gracilis	1.12e-06	1.77e-06	1.89e-06	1.82e-06	8.48e-07	1.32e-06	1.1e-06	1.13e-06	1.81e-06	1.21e-06	1.47e-06	8.42e-07	1.11e-06	1.22e-06	1.38e-06
s__Borrelia_hispanica	0	2.13e-08	0	0	0	2.69e-08	0	0	0	0	0	2.05e-08	5.05e-08	0	0
s__delta_proteobacterium_AV-1	0	0	0	0	0	0	0	0	5.04e-08	2.52e-08	4.82e-08	2.05e-08	0	2.44e-08	0
s__Saccharibacillus_kuerlensis	4.27e-06	5.08e-06	4.37e-06	6.46e-06	4.06e-06	4.49e-06	3.39e-06	4.81e-06	5.29e-06	3.8e-06	4.97e-06	4.62e-06	4.83e-06	5.4e-06	3.72e-06
s__Candidatus_Jorgensenbacteria_bacterium_GW2011_GWB1_49_9	7.86e-08	0	4.5e-08	0	9.17e-08	2.69e-07	1.83e-07	6.8e-08	3.28e-07	2.52e-07	7.23e-08	3.7e-07	0	1.71e-07	0
s__uncultured_marine_thaumarchaeote_KM3_74_H09	0	0	0	3.99e-08	0	0	4.58e-08	2.27e-08	0	0	0	0	0	0	2.42e-08
s__Paramecium_bursaria_Chlorella_virus_NW6652	1.97e-08	0	0	0	0	0	0	0	0	0	0	0	0	0	0
s__Cellulomonas_sp_URHD0024	1.57e-07	1.49e-07	1.8e-07	1.99e-07	2.52e-07	9.14e-07	4.58e-07	6.8e-07	5.29e-07	3.02e-07	3.62e-07	3.29e-07	1.26e-07	2.93e-07	2.18e-07
s__Arthrobacter_sp_Hiyo4	1.97e-07	8.51e-08	1.8e-07	1.99e-08	6.88e-08	8.06e-08	9.39e-07	2.27e-08	7.56e-08	1.76e-07	2.41e-08	0	5.05e-08	1.22e-07	2.18e-07
s__uncultured_archaeon_GZfos27A8	0	0	0	0	2.29e-08	0	0	0	0	0	0	0	0	0	0
s__Agathobacter_ruminis	0	0	0	1.8e-07	0	0	0	4.54e-08	2.52e-08	0	1.69e-07	1.23e-07	0	7.33e-08	2.42e-08
s__Bifidobacterium_saeculare	1.91e-06	2.34e-06	1.71e-06	2.71e-06	3.03e-06	1.03e-05	2.79e-06	6.49e-06	5.09e-06	4.3e-06	1.01e-05	1.25e-05	4.9e-06	1.03e-05	4.16e-06
s__Aquimarina_agarilytica	1.34e-05	1.37e-05	1.16e-05	1.11e-05	1.23e-05	1.49e-05	1.09e-05	1.2e-05	1.28e-05	1.4e-05	1.11e-05	1.39e-05	1.49e-05	8.31e-06	1.17e-05
s__Intestinimonas_butyriciproducens	0.000280439	0.000491835	0.000234403	0.000423202	0.000342428	0.000333983	0.000335718	0.00027465	0.000716852	0.0001612	0.000537002	0.000447348	0.000413259	0.000842717	0.00064499
s__Pseudomonas_sp_TAD18	1.97e-07	1.28e-07	9.01e-08	9.97e-08	1.15e-07	1.61e-07	1.14e-07	1.36e-07	5.04e-08	1.51e-07	2.41e-07	1.85e-07	2.78e-07	4.89e-08	6.28e-07
s__Halobacteroides_sp_TB21	0	0	0	1.99e-08	0	0	0	0	0	0	0	0	0	0	0
s__uncultured_Sphingobacterium_sp	1.18e-07	6.38e-08	4.05e-07	2.19e-07	2.29e-08	2.69e-08	9.16e-08	2.49e-07	2.27e-07	7.55e-08	2.41e-08	1.85e-07	2.53e-08	4.89e-08	1.45e-07
s__Bacillus_sp_LL01	1.75e-06	8.29e-07	9.91e-07	2.05e-06	1.65e-06	1.34e-06	1.05e-06	1.41e-06	2.32e-06	1.26e-06	1.42e-06	1.42e-06	8.59e-07	1.83e-06	1.69e-06
s__Candidatus_Kaiserbacteria_bacterium_GW2011_GWB1_52_6	3.93e-08	2.13e-08	0	2.39e-07	4.59e-08	0	2.29e-08	0	0	0	0	2.05e-08	0	1.71e-07	2.42e-08
s__Clostridium_sp_CAG715	4.19e-05	3.57e-05	1.79e-05	0.000180566	3.88e-05	1.43e-05	2.41e-05	5.32e-05	2.56e-05	1.88e-05	1.91e-05	6.64e-05	1.48e-05	5.23e-05	3.4e-05
s__Streptococcus_gordonii	4.88e-06	3.21e-06	2.06e-05	6.16e-06	1.21e-05	7.15e-06	1.06e-05	7.73e-06	1.43e-05	5.46e-06	1.06e-05	5.32e-06	3.61e-06	1.2e-05	6.24e-06
s__Clostridium_sp_CAG575	0.000396762	5.28e-05	9.75e-05	0.000229173	6.14e-05	0.000148485	0.000234941	0.00012434	0.000122407	9.6e-05	0.000269152	0.00043987	0.00015796	6e-05	6.24e-05
s__Parcubacteria_group_bacterium_GW2011_GWB1_40_14	3.93e-08	1.49e-07	3.15e-07	5.98e-08	6.88e-08	1.08e-07	2.52e-07	9.07e-08	1.26e-07	7.55e-08	1.21e-07	6.16e-08	0	9.78e-08	4.83e-08
s__Roseobacter_sp_SK209-2-6	7.47e-07	1.62e-06	2.05e-06	1.28e-06	9.17e-08	1.48e-06	6.87e-08	2e-06	6.55e-07	1.46e-06	1.21e-06	9.24e-07	2.3e-06	1.22e-06	2.32e-06
s__Butyrivibrio_sp_MC2013	6.36e-05	4.41e-05	4.67e-05	0.000124779	0.000100942	3.85e-05	7.12e-05	5.06e-05	8.25e-05	4.71e-05	0.000116607	5.51e-05	4.78e-05	0.000123713	9.19e-05
s__Elsholtzia_haichowensis	0	0	2.25e-08	0	0	0	0	0	0	0	0	0	0	0	0
s__Porphyromonas_endodontalis	0.000241513	0.000228169	0.000250141	0.00019744	0.000218509	0.00021805	0.000217606	0.000195242	0.000192933	0.000267987	0.00018366	0.000177275	0.000250548	0.000143781	0.000189441
s__Methylobacterium_sp_Leaf91	0	0	0	0	0	0	2.29e-08	2.27e-08	0	0	0	6.16e-08	0	0	0
s__Synechococcus_sp_JA-2-3Ba2-13	5.7e-07	2.98e-07	2.03e-07	5.78e-07	4.82e-07	4.3e-07	8.01e-07	3.4e-07	4.79e-07	3.02e-07	6.27e-07	5.96e-07	6.32e-07	6.84e-07	5.32e-07
s__Coptotermes_formosanus	6.68e-07	1.08e-06	1.08e-06	1.32e-06	8.71e-07	7.26e-07	1.05e-06	4.54e-07	5.29e-07	1.61e-06	5.54e-07	5.34e-07	1.01e-06	4.89e-07	8.94e-07
s__Enterobacter_sp_DC1	5.9e-08	0	2.25e-08	0	0	2.69e-08	0	0	0	0	0	0	0	0	0
s__Candidatus_Saccharibacteria_bacterium_RAAC3_TM7_1	9.75e-05	1.28e-07	0.000104041	3.15e-05	7.39e-05	4.63e-05	0.000228323	2.5e-05	6.36e-05	6.23e-05	2.73e-05	4.4e-05	4.06e-05	6.51e-05	1.7e-05
s__Pseudoramibacter_alactolyticus	2.85e-05	1.14e-05	1.66e-05	2.17e-05	3.08e-05	1.76e-05	1.63e-05	2.23e-05	2.61e-05	1.48e-05	2.31e-05	2.17e-05	1.19e-05	2.61e-05	2.29e-05
s__Phaseolibacter_flectens	7.86e-07	6.38e-07	6.3e-07	7.38e-07	4.13e-07	6.99e-07	1.33e-06	7.03e-07	6.8e-07	8.31e-07	5.3e-07	8.83e-07	1.31e-06	3.42e-07	7.01e-07
s__Eubacterium_rectale	0.000309672	0.00016213	0.000196758	0.000687559	0.00058068	0.000146791	0.000377256	0.00021595	0.000341469	0.000158331	0.000590124	0.000252918	0.000171277	0.000719493	0.000502148
s__Enterobacter_cloacae	1.22e-05	1.47e-05	1.01e-05	2.14e-05	1.08e-05	1.33e-05	1.35e-05	1.33e-05	1.16e-05	1.4e-05	6.98e-05	1.38e-05	1.62e-05	1.51e-05	1.54e-05
s__Helianthus_annuus	1.97e-08	4.25e-08	0	0	0	0	0	0	0	0	0	0	0	0	0
s__Candidatus_Roizmanbacteria_bacterium_GW2011_GWB1_40_7	1.38e-07	2.13e-08	4.5e-08	1.99e-07	4.59e-08	5.38e-08	9.16e-08	1.59e-07	1.76e-07	0	4.82e-08	2.05e-07	0	2.93e-07	0
s__Haemophilus_influenzae	2.41e-05	1.84e-05	2.24e-05	1.8e-05	1.66e-05	2.48e-05	2e-05	2.02e-05	2.26e-05	2.23e-05	1.87e-05	2.48e-05	1.98e-05	1.8e-05	2.14e-05
s__Mangrovimonas_sp_ST2L12	1.87e-05	2.5e-05	2.04e-05	2e-05	1.68e-05	2.55e-05	2.36e-05	1.83e-05	1.8e-05	2.31e-05	1.59e-05	1.95e-05	2.5e-05	1.56e-05	1.81e-05
s__Methylobacterium_sp_Leaf469	1.97e-08	0	4.5e-08	0	4.59e-08	0	9.16e-08	0	1.01e-07	0	2.41e-08	0	2.53e-08	2.44e-08	2.42e-08
s__Candidatus_Methanomethylophilus_sp_1R26	9.24e-07	1.91e-06	1.58e-06	1.68e-06	7.8e-07	2.42e-06	1.14e-06	1.91e-06	2.14e-06	8.81e-07	1.64e-06	1.99e-06	2.4e-06	1.83e-06	1.72e-06
s__Flavobacterium_hibernum	1.29e-05	2.37e-05	1.41e-05	2.03e-05	7.43e-06	2.08e-05	1.35e-05	1.76e-05	8.16e-06	1.39e-05	1.73e-05	1.27e-05	2.79e-05	1.38e-05	2.11e-05
s__Saprospira_grandis	1.76e-05	1.63e-05	1.47e-05	1.37e-05	1.5e-05	1.52e-05	1.77e-05	1.75e-05	1.26e-05	2.03e-05	1.26e-05	1.25e-05	1.81e-05	1.09e-05	1.59e-05
s__Brevundimonas_diminuta	1.07e-05	1.57e-06	3.17e-06	1.56e-06	7.73e-05	2.42e-06	1.92e-06	2.68e-06	1.76e-06	2.52e-06	3.66e-06	2.26e-06	2.25e-06	2.25e-06	2.76e-06
s__Corchorus_aestuans	0	0	0	0	0	0	0	4.54e-08	2.52e-08	0	0	2.05e-08	2.53e-08	0	0
s__Lyngbya_majuscula	0	2.13e-08	0	0	0	2.69e-08	0	0	0	0	4.82e-08	0	0	0	0
s__Micromonospora_sp_CNB394	1.97e-08	3.19e-07	0	9.97e-08	1.15e-07	2.69e-08	4.58e-08	0	1.51e-07	1.76e-07	9.64e-08	4.11e-08	2.53e-08	0	0
s__Renibacterium_salmoninarum	3.34e-07	6.59e-07	3.15e-07	7.58e-07	1.61e-07	7.26e-07	3.66e-07	3.4e-07	2.52e-07	5.54e-07	5.3e-07	3.9e-07	1.01e-06	3.91e-07	5.8e-07
s__Paenibacillus_sabinae	2.99e-06	2.06e-06	2e-06	4.65e-06	2.52e-06	2.02e-06	4.3e-06	2.06e-06	2.62e-06	2.32e-06	4.41e-06	2.79e-06	1.92e-06	4.38e-06	2.83e-06
s__Mycobacterium_sp_Root265	7.86e-08	0	4.5e-08	3.99e-08	4.59e-08	0	4.58e-08	1.81e-07	2.52e-08	0	2.41e-08	6.16e-08	5.05e-08	4.89e-08	0
s__Pseudomonas_sp_WCS374	0	0	0	0	0	0	0	0	0	0	0	0	0	0	0
s__Methanosarcina_lacustris	4.52e-07	2.76e-07	1.8e-07	4.59e-07	3.44e-07	3.49e-07	4.35e-07	1.36e-07	4.03e-07	2.52e-07	5.06e-07	3.9e-07	3.03e-07	1.1e-06	4.83e-07
s__Sphingobium_chlorophenolicum	2.36e-07	4.04e-07	3.83e-07	1.99e-07	4.59e-07	3.23e-07	3.21e-07	2.49e-07	2.02e-07	2.77e-07	1.21e-07	3.08e-07	3.03e-07	2.44e-07	2.42e-07
s__candidate_divison_MSBL1_archaeon_SCGC-AAA382A13	7.86e-08	0	6.75e-08	0	2.29e-08	0	2.29e-08	0	5.04e-08	2.52e-08	4.82e-08	1.23e-07	0	0	0
s__Parcubacteria_group_bacterium_GW2011_GWC1_34_10	4.13e-07	6.38e-08	6.98e-07	4.19e-07	1.83e-07	2.15e-07	8.24e-07	3.18e-07	2.77e-07	2.52e-07	9.64e-08	1.23e-07	4.04e-07	1.96e-07	9.67e-08
s__uncultured_Flavobacterium_sp	6.88e-07	1.62e-06	1.62e-06	1.32e-06	9.17e-08	1.4e-06	8.7e-07	5.44e-07	2.52e-07	1.59e-06	6.99e-07	6.78e-07	1.72e-06	7.82e-07	1.11e-06
s__OM182_bacterium_BACL3_MAG-120920-bin41	0	0	0	0	0	0	0	0	0	0	0	0	0	0	2.42e-08
s__Pseudomonas_syringae	5.23e-06	5.08e-06	3.69e-06	7.16e-06	3.97e-06	3.63e-06	4.1e-06	6.9e-06	6.43e-06	3.95e-06	3.4e-06	4.6e-06	4.19e-06	4.72e-06	5.85e-06
s__Saprolegnia_diclina	5.9e-08	6.38e-08	9.01e-08	1.99e-08	1.15e-07	8.06e-08	1.6e-07	9.07e-08	7.56e-08	7.55e-08	4.82e-08	1.85e-07	5.05e-08	1.96e-07	9.67e-08
s__Nocardiopsis_synnemataformans	3.54e-07	1.7e-07	4.73e-07	2.39e-07	3.21e-07	1.34e-07	6.18e-07	2.27e-07	2.52e-07	4.03e-07	3.37e-07	1.44e-07	2.53e-07	3.91e-07	2.42e-07
s__Sinomonas_humi	2.75e-07	2.34e-07	5.18e-07	3.19e-07	1.38e-07	2.96e-07	8.24e-07	7.26e-07	1.03e-06	5.79e-07	2.65e-07	7.19e-07	5.31e-07	7.82e-07	4.83e-07
s__Tenacibaculum_sp_47A_GOM-205m	3.24e-06	3.42e-06	4.37e-06	2.85e-06	3.07e-06	2.37e-06	3.85e-06	4.47e-06	3.07e-06	4.78e-06	3.23e-06	2.47e-06	3.26e-06	2.3e-06	3.09e-06
s__Photorhabdus_luminescens	2.73e-06	1.89e-06	2.9e-06	3.93e-06	2.34e-06	1.83e-06	4.72e-06	3.06e-06	3.12e-06	1.79e-06	1.25e-06	1.91e-06	1.52e-06	1.86e-06	1.4e-06
s__uncultured_Leifsonia_sp	0	0	2.25e-08	0	0	0	0	0	0	0	0	0	0	0	0
s__Eubacterium_sp_CAG76	4.71e-05	8.85e-06	2e-05	7.08e-05	5.36e-05	1.42e-05	2.19e-05	1.81e-05	2.78e-05	1.52e-05	7.7e-05	2.6e-05	9.2e-06	5.24e-05	4.26e-05
s__Nocardioides_sp_Soil774	1.77e-07	8.51e-08	2.25e-07	1.6e-07	1.83e-07	5.38e-08	2.52e-07	4.54e-08	1.51e-07	7.55e-08	4.82e-08	1.03e-07	0	1.47e-07	2.42e-08
s__uncultured_bacterium_Contig3a	1.38e-07	1.28e-07	2.03e-07	1.22e-06	2.52e-07	8.06e-08	1.6e-07	2.04e-07	3.02e-07	1.26e-07	2.41e-07	3.29e-07	2.27e-07	7.33e-07	2.9e-07
s__Bordetella_parapertussis	1.57e-07	1.7e-07	2.03e-07	1.4e-07	4.13e-07	1.88e-07	1.6e-07	2.49e-07	1.76e-07	1.51e-07	3.13e-07	1.03e-07	2.53e-08	7.33e-08	2.42e-08
s__Acinetobacter_sp_272263	1.18e-07	2.13e-08	0	3.99e-08	9.17e-08	0	2.29e-08	2.27e-08	2.52e-08	7.55e-08	0	2.05e-08	0	0	0
s__Lachnospiraceae_bacterium_CAG364	8.06e-06	4.72e-06	3.22e-06	1.65e-05	1.05e-05	3.41e-06	9.32e-06	5.42e-06	8.97e-06	4.2e-06	1.68e-05	9.49e-06	4.47e-06	2.19e-05	1.26e-05
s__Mizugakiibacter_sediminis	9.24e-07	4.47e-07	5.4e-07	4.39e-07	1.01e-06	6.18e-07	1.03e-06	1.59e-07	8.06e-07	9.56e-07	4.82e-07	4.52e-07	8.09e-07	4.16e-07	5.08e-07
s__Nocardia_arthritidis	2.16e-07	8.51e-08	3.38e-07	1.99e-07	8.48e-07	1.34e-07	4.58e-08	2.49e-07	4.28e-07	3.02e-07	1.69e-07	1.64e-07	7.58e-08	2.44e-07	1.93e-07
s__Rheinheimera_sp_KL1	5.9e-08	8.51e-08	0	3.39e-07	1.15e-07	1.88e-07	2.75e-07	1.36e-07	3.78e-07	7.55e-08	2.65e-07	2.05e-07	3.54e-07	9.78e-07	2.66e-07
s__uncultured_bacterium_DCM003Kan03	0	0	0	0	0	0	0	0	0	2.52e-08	9.64e-08	0	0	0	0
s__Pseudorhodobacter_ferrugineus	1.45e-06	7.23e-07	1.46e-06	4.39e-07	1.1e-06	1.08e-06	1.21e-06	3.4e-07	1.06e-06	1.26e-06	1.3e-06	1.03e-06	6.82e-07	9.53e-07	9.67e-07
s__Streptomyces_celluloflavus	1.06e-06	3.83e-07	1.22e-06	5.78e-07	1.86e-06	1.88e-07	1.01e-06	2.95e-07	5.54e-07	6.29e-07	6.27e-07	3.9e-07	1.77e-07	2.69e-07	2.66e-07
s__Clostridiales_bacterium_VE202-28	2.6e-05	4.77e-05	1.28e-05	9.58e-05	4.66e-05	1.18e-05	4.55e-05	1.76e-05	4.37e-05	2.5e-05	0.000120464	3.53e-05	4.29e-05	0.000122148	7.54e-05
s__Prochlorococcus_sp_W2	2.56e-07	1.7e-07	1.58e-07	2.79e-07	2.29e-07	1.08e-07	1.37e-07	9.07e-08	2.52e-07	2.52e-07	3.62e-07	3.08e-07	1.77e-07	2.93e-07	2.66e-07
s__Candidatus_Azambacteria_bacterium_GW2011_GWB1_42_72	1.97e-08	2.13e-08	6.75e-08	0	4.59e-08	8.06e-08	3.21e-07	0	2.52e-08	1.26e-07	2.41e-08	6.16e-08	2.53e-08	4.89e-08	2.42e-08
s__Risungbinella_massiliensis	1.06e-06	8.93e-07	9.01e-07	1.4e-06	1.51e-06	7.8e-07	1.42e-06	1.27e-06	1.56e-06	4.78e-07	1.4e-06	1.15e-06	9.35e-07	1.1e-06	9.67e-07
s__Aliiarcobacter_faecis	0	0	0	1.99e-08	0	0	0	0	0	0	0	0	0	0	0
s__Nocardioides_sp_CF8	1.08e-06	3.4e-07	9.68e-07	8.18e-07	2.22e-06	1.34e-07	9.85e-07	1.02e-06	5.54e-07	7.8e-07	6.03e-07	1.23e-07	4.3e-07	8.56e-07	3.14e-07
s__Brevundimonas_abyssalis	2.36e-07	8.51e-08	3.83e-07	9.97e-08	1.4e-06	2.42e-07	3.21e-07	2.95e-07	3.02e-07	2.01e-07	3.13e-07	8.63e-07	3.54e-07	2.69e-07	3.87e-07
s__Methylophilus_sp_5	2.75e-07	2.34e-07	9.01e-08	1.4e-07	1.83e-07	1.34e-07	4.35e-07	4.54e-08	3.28e-07	1.76e-07	1.69e-07	2.67e-07	2.78e-07	2.44e-07	1.69e-07
s__Bothriochloa_alta	0	0	0	1.99e-08	0	0	0	0	0	0	0	0	0	0	0
s__Streptomyces_sp_CNT371	1.18e-07	2.13e-08	2.25e-08	9.97e-08	6.88e-08	1.08e-07	4.58e-08	9.07e-08	0	5.03e-08	2.41e-07	4.11e-08	2.02e-07	2.2e-07	2.18e-07
s__Ensifer_glycinis	5.9e-08	4.25e-08	6.75e-08	9.97e-08	2.29e-08	2.96e-07	0	2.27e-08	1.26e-07	7.55e-08	1.93e-07	8.22e-08	2.02e-07	0	2.42e-07
s__Desulfonatronum_thioautotrophicum	3.42e-06	3.53e-06	2.63e-06	9.1e-06	2.75e-06	5.11e-06	3.05e-06	5.99e-06	2.77e-06	4.03e-06	4.15e-06	2.77e-06	5.56e-06	6.6e-06	4.23e-06
s__Triparma_laevis	1.97e-08	0	0	0	0	0	2.29e-08	0	0	0	0	0	2.53e-08	2.44e-08	0
s__Beggiatoa_sp_PS	4.82e-06	1.6e-06	3.9e-06	1.85e-06	3.05e-06	3.74e-06	6e-06	1.54e-06	3.05e-06	2.84e-06	3.11e-06	2.84e-06	2e-06	2.71e-06	2.37e-06
s__Streptomyces_durhamensis	6.88e-07	4.04e-07	4.73e-07	1.4e-07	2.06e-07	1.08e-07	1.6e-07	3.18e-07	3.53e-07	3.27e-07	2.17e-07	4.31e-07	4.8e-07	9.78e-08	9.67e-08
s__Micromonospora_auratinigra	5.9e-07	2.13e-07	1.8e-07	1.6e-07	5.73e-07	4.03e-07	4.12e-07	3.86e-07	5.54e-07	7.55e-08	1.45e-07	3.08e-07	2.27e-07	4.64e-07	1.21e-07
s__Neisseria_iguanae	0	0	0	0	0	0	0	0	0	0	0	0	2.53e-08	0	0
s__Mastigocladus_laminosus	0	0	6.75e-08	1.99e-08	0	8.06e-08	1.14e-07	6.8e-08	2.52e-08	2.52e-08	0	4.11e-08	0	4.89e-08	2.42e-08
s__Rattus_leucopus	1.97e-08	0	0	0	0	0	0	0	0	0	0	0	0	0	0
s__Prochlorococcus_sp_scB241_527E14	1.97e-08	2.13e-08	0	1.99e-08	2.29e-08	2.69e-08	2.29e-08	0	0	2.52e-08	0	2.05e-08	0	0	0
s__Nocardiopsis_valliformis	9.83e-08	3.62e-07	9.01e-08	1.2e-07	2.29e-08	8.06e-08	2.75e-07	4.54e-08	2.52e-08	1.01e-07	1.45e-07	1.23e-07	2.27e-07	2.44e-07	1.45e-07
s__Paraburkholderia_kururiensis	6.68e-07	6.81e-07	8.11e-07	4.19e-07	8.26e-07	7.53e-07	1.05e-06	4.99e-07	8.57e-07	1.01e-06	5.3e-07	9.86e-07	1.01e-06	5.38e-07	5.56e-07
s__Yersinia_pestis	5.31e-07	5.96e-07	1.04e-06	9.57e-07	6.88e-07	9.41e-07	8.01e-07	2.06e-06	9.07e-07	9.82e-07	8.68e-07	5.34e-07	7.08e-07	1.17e-06	9.18e-07
s__Paenisporosarcina_sp_ApR1A282	0	0	0	0	0	2.69e-08	0	1.36e-07	0	0	0	0	0	0	0
s__Perkinsela_sp_CCAP_1560/4	1.97e-08	2.13e-08	0	0	4.59e-08	0	0	0	2.52e-08	0	2.41e-08	0	0	0	0
s__Parabacteroides_sp_CAG2	0.000160891	0.000143095	0.000174288	0.000130962	0.000246943	0.000124562	9.27e-05	0.000128014	0.000106759	0.000121938	0.000104677	0.000118416	0.000159148	8.24e-05	0.000106105
s__Candidatus_Daviesbacteria_bacterium_GW2011_GWB1_41_5	1.55e-06	2.34e-07	1.17e-06	4.19e-07	1.22e-06	1.42e-06	1.67e-06	4.08e-07	8.57e-07	1.51e-06	9.88e-07	8.01e-07	4.3e-07	1.47e-06	6.04e-07
s__uncultured_bacterium_F41-01	0	2.13e-08	0	0	0	0	0	0	0	2.52e-08	0	2.05e-08	0	0	0
s__Oscillibacter_sp_CAG155	0.000190478	0.000350675	0.000144973	0.000287015	0.000343001	0.000114213	0.000211767	0.000171268	0.000347188	0.000100143	0.000367345	0.000234408	0.000258079	0.000515408	0.00033151
s__Kocuria_polaris	4.72e-07	4.47e-07	4.73e-07	4.99e-07	2.75e-07	5.64e-07	3.43e-07	4.31e-07	3.02e-07	4.28e-07	3.37e-07	4.31e-07	4.55e-07	3.67e-07	3.14e-07
s__Pseudomonas_sp_C5pp	9.83e-08	0	0	5.98e-08	2.29e-08	2.69e-08	0	0	2.52e-08	0	0	0	0	2.44e-08	0
s__Colletotrichum_fructicola	6.88e-07	4.47e-07	1.19e-06	2.59e-07	3.9e-07	8.06e-08	1.14e-07	2.04e-07	2.27e-07	1.26e-07	1.93e-07	4.31e-07	4.55e-07	2.44e-08	9.67e-08
s__Pseudomonas_sp_S9	1.38e-07	8.51e-08	4.5e-08	1.2e-07	2.98e-07	5.38e-08	1.14e-07	2.27e-08	5.04e-08	7.55e-08	7.23e-08	4.11e-08	1.26e-07	9.78e-08	7.25e-08
s__Sphingobium_sp_DC-2	0	0	0	3.99e-08	0	1.08e-07	2.29e-08	9.07e-08	2.52e-08	0	0	0	0	0	4.83e-08
s__Chitinimonas_koreensis	1.22e-06	1.08e-06	6.3e-07	9.37e-07	1.35e-06	8.87e-07	6.41e-07	8.85e-07	1.29e-06	1.11e-06	9.4e-07	8.83e-07	9.1e-07	7.33e-07	9.67e-07
s__Frigoribacterium_sp_Leaf186	1.57e-07	1.7e-07	1.35e-07	1.2e-07	9.17e-08	5.38e-08	8.01e-07	2.27e-08	2.77e-07	1.51e-07	2.41e-08	8.22e-08	1.01e-07	2.69e-07	0
s__Mesorhizobium_sp_LSJC269B00	0	0	2.25e-08	0	0	0	0	2.27e-08	0	2.52e-08	4.82e-08	0	0	9.78e-08	1.21e-07
s__Bacillus_amyloliquefaciens	3.75e-06	2.64e-06	4.46e-06	6.12e-06	4.75e-06	4.3e-06	4.85e-06	3.72e-06	5.17e-06	2.32e-06	4.75e-06	4.66e-06	2.7e-06	8.31e-06	3.79e-06
s__Herminiimonas_arsenicoxydans	1.04e-06	5.96e-07	8.33e-07	2.39e-07	5.73e-07	9.41e-07	9.16e-08	3.63e-07	2.27e-07	6.54e-07	2.41e-07	5.96e-07	7.83e-07	3.91e-07	6.04e-07
s__Bacillus_stratosphericus	3.52e-06	6.17e-07	5.7e-06	2.91e-06	3.39e-06	7.85e-06	1.44e-06	2.13e-06	2.8e-06	9.31e-07	3.06e-06	2.07e-06	1.01e-06	2e-06	2.71e-06
s__Paraburkholderia_bryophila	9.24e-07	2.55e-07	2.25e-07	3.19e-07	1.28e-06	2.15e-07	5.04e-07	1.36e-07	7.06e-07	9.31e-07	4.58e-07	4.11e-07	9.6e-07	4.64e-07	7.25e-07
s__Candidatus_Azambacteria_bacterium_GW2011_GWC2_45_7b	0	0	0	1.99e-08	0	0	9.16e-08	0	0	0	0	0	0	0	0
s__Sphingobium_sp_AP49	5.9e-08	0	2.25e-08	1.4e-07	1.61e-07	8.06e-08	6.87e-08	1.13e-07	1.26e-07	2.52e-08	1.45e-07	1.23e-07	1.26e-07	1.96e-07	7.25e-08
s__Bradyrhizobium_sp_thb2	4.52e-07	8.51e-08	4.5e-08	9.97e-08	2.29e-08	2.15e-07	2.29e-08	9.07e-08	2.52e-08	7.55e-08	9.64e-08	1.23e-07	1.52e-07	1.96e-07	0
s__Desulfosporosinus_sp_BICA1-9	1.53e-05	5.53e-06	4.5e-06	8.24e-06	1.42e-05	6.02e-06	1.04e-05	5.58e-06	1.18e-05	9.64e-06	6.51e-06	6.02e-06	6.9e-06	9.04e-06	8.65e-06
s__Pyrococcus_horikoshii	3.15e-07	1.91e-07	1.8e-07	2.59e-07	1.83e-07	8.06e-08	1.6e-07	9.07e-08	1.26e-07	3.27e-07	3.37e-07	1.03e-07	5.05e-08	5.62e-07	2.18e-07
s__Streptomyces_sp_NRRL_S-623	0	2.13e-08	0	0	0	0	0	0	0	0	0	0	0	0	7.25e-08
s__Dictyoglomus_turgidum	9.04e-07	9.36e-07	7.43e-07	1.26e-06	5.5e-07	1.1e-06	6.18e-07	9.98e-07	1.23e-06	1.08e-06	1.35e-06	1.15e-06	9.6e-07	1.98e-06	9.91e-07
s__Xanthomonas_campestris	2.67e-06	4.1e-06	2.36e-06	3.85e-06	2.77e-06	2.42e-06	2.02e-06	1.68e-06	2.9e-06	2.29e-06	4.56e-06	1.5e-06	2.93e-06	5.45e-06	3.84e-06
s__Halobacillus_dabanensis	3.93e-08	4.25e-08	4.5e-08	7.98e-08	1.61e-07	2.15e-07	9.16e-08	1.59e-07	7.56e-08	1.26e-07	7.23e-08	1.03e-07	2.53e-08	1.71e-07	7.25e-08
s__Ochrobactrum_rhizosphaerae	4.91e-07	1.7e-07	4.28e-07	5.39e-07	4.82e-07	8.6e-07	3.21e-07	5.9e-07	1.13e-06	3.78e-07	4.82e-07	6.37e-07	7.58e-08	9.04e-07	2.66e-07
s__Aotus_lemurinus	0	0	0	0	0	0	0	0	0	0	0	0	0	2.44e-08	0
s__Shewanella_benthica	7.47e-07	2.13e-07	1.35e-07	5.98e-07	8.26e-07	7.26e-07	6.87e-07	2.36e-06	1.13e-06	6.8e-07	6.03e-07	9.86e-07	9.86e-07	8.31e-07	1.4e-06
s__uncultured_Hyphomonas_sp	0	0	0	0	0	0	0	2.27e-08	0	0	0	0	0	4.89e-08	0
s__Solimonas_variicoloris	3.93e-08	0	4.5e-08	5.98e-08	1.15e-07	0	6.87e-08	2.27e-08	5.04e-08	0	9.64e-08	1.23e-07	2.53e-08	0	1.21e-07
s__Condylura_cristata	0	2.13e-08	2.25e-08	0	0	0	0	0	0	2.52e-08	0	0	7.58e-08	0	0
s__Psychrobacter_phage_pOW20-A	0	0	2.25e-08	3.99e-08	0	0	0	0	0	0	0	0	0	0	0
s__Loktanella_sp_S4079	1.97e-07	2.98e-07	2.48e-07	4.39e-07	2.98e-07	3.76e-07	2.29e-07	3.4e-07	1.26e-07	2.52e-08	1.45e-07	1.64e-07	1.52e-07	2.2e-07	9.67e-08
s__Lactobacillus_malefermentans	6.09e-07	7.66e-07	6.53e-07	5.98e-07	7.8e-07	3.76e-07	1.19e-06	2.49e-07	5.54e-07	6.29e-07	8.44e-07	4.73e-07	4.8e-07	1.05e-06	4.35e-07
s__Streptomyces_aureocirculatus	1.97e-08	2.13e-08	1.58e-07	9.97e-08	2.29e-07	1.34e-07	1.83e-07	2.27e-08	1.01e-07	1.01e-07	2.17e-07	2.05e-08	1.01e-07	4.4e-07	4.83e-08
s__Enterobacter_hormaechei_subsp_xiangfangensis	1.97e-08	2.13e-08	0	6.18e-07	4.59e-08	0	9.16e-08	2.27e-08	0	0	2.53e-06	2.05e-08	0	2.44e-08	2.42e-08
s__Geobacillus_sp_CAMR12739	5.9e-08	0	0	7.98e-08	4.59e-08	8.06e-08	1.14e-07	0	1.76e-07	0	1.21e-07	1.03e-07	2.53e-08	7.33e-08	4.83e-08
s__Pseudomonas_sp_Leaf127	1.38e-07	1.91e-07	1.13e-07	5.98e-08	1.38e-07	1.08e-07	9.16e-08	0	2.02e-07	1.51e-07	1.93e-07	1.44e-07	1.52e-07	4.89e-08	1.21e-07
s__Campylobacter_virus_CP220	1.97e-08	0	0	5.98e-08	0	0	0	2.27e-08	5.04e-08	0	0	0	5.05e-08	4.89e-08	2.42e-08
s__Spirochaeta_africana	6.27e-06	6.59e-06	6.19e-06	6.18e-06	3.67e-06	6.96e-06	5.36e-06	5.01e-06	4.84e-06	7.6e-06	6.41e-06	4.07e-06	7.66e-06	6.84e-06	6.65e-06
s__Mycobacterium_virus_Baka	0	0	0	0	0	0	0	0	0	0	0	0	0	0	0
s__Flavobacterium_limnosediminis	6.94e-06	5.1e-06	3.85e-06	3.73e-06	5.3e-06	3.01e-06	3.89e-06	6.69e-06	5.69e-06	6.09e-06	4.34e-06	4.89e-06	6.24e-06	3.62e-06	6.28e-06
s__Shinella_sp_DD12	3.54e-07	2.13e-07	1.13e-07	1.8e-07	3.67e-07	1.61e-07	3.21e-07	2.27e-07	6.8e-07	4.03e-07	2.89e-07	2.67e-07	5.05e-08	2.93e-07	3.38e-07
s__Streptomyces_pyridomyceticus	0	0	2.25e-08	0	9.17e-08	0	0	0	0	0	2.41e-08	2.05e-08	0	0	0
s__Frankia_sp_DC12	1.77e-07	2.13e-07	6.75e-08	1.6e-07	1.83e-07	5.38e-08	4.58e-08	2.27e-08	1.26e-07	1.26e-07	7.23e-08	2.05e-08	1.01e-07	1.96e-07	1.21e-07
s__Nafulsella_turpanensis	3.11e-05	3.98e-05	3.7e-05	3.25e-05	2.55e-05	3.59e-05	3.08e-05	4.27e-05	2.89e-05	3.78e-05	2.84e-05	3.17e-05	4.01e-05	2.37e-05	2.77e-05
s__Sedimentitalea_nanhaiensis	6.49e-07	4.47e-07	4.5e-07	4.79e-07	4.13e-07	2.69e-07	7.1e-07	6.12e-07	3.28e-07	5.29e-07	2.17e-07	2.67e-07	1.52e-07	3.18e-07	2.66e-07
s__Mycobacterium_sp_012931	0	2.13e-08	0	1.99e-08	0	0	0	0	0	0	2.41e-08	0	0	7.33e-08	0
s__Candidatus_Amesbacteria_bacterium_GW2011_GWC1_46_24	0	0	2.25e-08	0	2.29e-08	2.69e-08	0	0	7.56e-08	0	0	0	0	0	0
s__Lactobacillus_oris	8.39e-06	4.51e-06	0.000117438	4.25e-06	3.12e-05	4.28e-05	2.87e-05	2.39e-05	7.89e-06	2.52e-05	1.18e-05	1.1e-05	3.66e-06	1.67e-05	1.07e-05
s__Rhodococcus_imtechensis	1.97e-08	4.25e-08	2.25e-08	0	2.29e-08	4.3e-07	2.29e-08	1.81e-07	2.52e-07	0	7.23e-08	3.9e-07	5.05e-08	3.67e-07	0
s__Chryseobacterium_greenlandense	1.25e-05	7.7e-06	1.23e-05	7e-06	2.22e-05	4.17e-06	3.09e-06	4.67e-06	7.31e-06	8.28e-06	6.07e-06	3.35e-06	5.58e-06	4.6e-06	6.09e-06
s__Pectobacterium_carotovorum_subsp_actinidiae	7.86e-08	4.25e-08	6.75e-08	3.39e-07	9.17e-08	2.69e-08	0	2.27e-08	5.04e-08	1.51e-07	4.82e-08	4.11e-08	5.05e-08	2.44e-08	0
s__uncultured_Alicyclobacillus_sp	0	0	0	0	0	0	0	0	0	0	0	0	0	2.44e-08	0
s__Opitutus_terrae	6.25e-06	9.85e-06	6.89e-06	9.29e-06	4.63e-06	1.13e-05	5.56e-06	6.85e-06	6.35e-06	7.9e-06	7.83e-06	6.92e-06	1.09e-05	6.5e-06	7.88e-06
s__Rhodococcus_wratislaviensis	9.83e-08	8.51e-08	0	7.98e-08	1.61e-07	5.38e-08	4.58e-08	4.54e-08	1.26e-07	1.01e-07	2.65e-07	2.67e-07	2.53e-07	3.18e-07	7.25e-08
s__Thalassobius_activus	0	0	0	1.99e-08	2.29e-08	0	4.58e-08	0	0	0	2.41e-08	0	2.53e-08	0	0
s__Paenibacillus_sp_C7	0	0	0	0	0	0	0	0	0	0	0	0	0	4.89e-08	0
s__Eggerthella_sp_CAG368	1.06e-05	9.23e-06	1.14e-05	1.08e-05	9.49e-06	1.33e-05	1.75e-05	1.21e-05	1.13e-05	8.53e-06	1e-05	1.16e-05	1.39e-05	3.1e-05	8.8e-06
s__Candidatus_Aquiluna_sp_IMCC13023	3.93e-08	2.55e-07	1.8e-07	6.18e-07	3.44e-07	1.88e-07	2.06e-07	6.8e-08	4.54e-07	1.76e-07	2.65e-07	2.26e-07	1.01e-07	3.67e-07	1.45e-07
s__Porphyromonas_sp_KLE_1280	7.42e-05	7.46e-05	7.43e-05	6.39e-05	6.77e-05	6.51e-05	7.81e-05	5.67e-05	5.38e-05	8.36e-05	5.95e-05	5.1e-05	9.15e-05	4.34e-05	6.36e-05
s__Methylocystis_sp_LW5	3.93e-08	0	2.25e-08	3.99e-08	0	0	6.87e-08	0	7.56e-08	0	0	0	5.05e-08	0	0
s__Microgenomates_group_bacterium_GW2011_GWA2_46_7	1.38e-07	4.25e-08	3.6e-07	1.8e-07	4.59e-08	5.38e-08	8.47e-07	4.54e-08	2.02e-07	1.51e-07	0	1.64e-07	1.77e-07	2.2e-07	4.83e-08
s__Paenibacillus_virus_Willow	0	0	0	0	0	0	0	0	0	0	0	6.16e-08	0	0	2.42e-08
s__Klebsiella_phage_JD001	0	0	0	0	0	0	0	0	7.56e-08	0	0	0	0	0	0
s__Ethanoligenens_harbinense	6.01e-05	5.66e-05	6.14e-05	6.94e-05	8.66e-05	5.01e-05	6.14e-05	5.82e-05	7.5e-05	5.2e-05	6.98e-05	5.84e-05	5.06e-05	8.2e-05	6.23e-05
s__Oerskovia_sp_Root22	1.77e-07	2.55e-07	6.75e-08	5.98e-08	1.61e-07	5.38e-08	4.58e-08	2.27e-08	1.26e-07	2.52e-08	7.23e-08	8.22e-08	2.53e-08	1.96e-07	7.25e-08
s__Thermotoga_sp_RQ7	4.33e-07	1.91e-07	1.58e-07	3.79e-07	2.52e-07	2.69e-08	3.21e-07	1.36e-07	3.78e-07	1.26e-07	2.41e-07	6.16e-08	1.77e-07	2.2e-07	3.14e-07
s__Rathayibacter_sp_Leaf299	0	2.13e-08	0	0	0	0	4.58e-08	6.8e-08	0	2.52e-08	4.82e-08	1.03e-07	2.53e-08	9.78e-08	7.25e-08
s__Bacillus_phage_vB_BhaS-171	6.29e-07	4.47e-07	4.05e-07	8.58e-07	3.44e-07	4.03e-07	5.72e-07	1.59e-07	4.28e-07	9.82e-07	5.06e-07	3.9e-07	8.59e-07	7.33e-07	5.32e-07
s__Kallipyga_massiliensis	1.51e-06	1.32e-06	1.01e-06	2.55e-06	1.7e-06	3.36e-06	2.27e-06	4.11e-06	5.62e-06	2.14e-06	3.49e-06	3.64e-06	1.36e-06	4.86e-06	3.05e-06
s__Peptococcaceae_bacterium_BRH_c8a	2.36e-06	1.32e-06	1.35e-06	4.15e-06	1.67e-06	1.88e-06	2.22e-06	1.47e-06	2.67e-06	1.26e-06	3.49e-06	3.18e-06	1.49e-06	7.7e-06	4.5e-06
s__Trueperella_bonasi	0	0	0	0	0	2.69e-08	0	0	0	0	2.41e-08	0	0	0	0
s__Cellulophaga_phage_phi101	4.13e-07	2.34e-07	4.5e-08	5.58e-07	2.52e-07	1.88e-07	1.88e-06	7.94e-07	3.28e-07	2.77e-07	1.21e-07	1.85e-07	3.29e-07	1.71e-07	2.66e-07
s__Oleiphilus_sp_HI0043	7.27e-07	1.02e-06	9.68e-07	8.78e-07	5.73e-07	1.42e-06	7.33e-07	1.38e-06	1.49e-06	7.3e-07	6.99e-07	1.54e-06	1.24e-06	9.53e-07	1.67e-06
s__Staphylococcus_virus_SA11	1.97e-07	0	1.13e-07	0	2.29e-08	0	0	0	0	0	0	0	0	0	0
s__Fragaria_vesca_subsp_bracteata	0	0	0	0	2.29e-08	0	0	0	0	0	0	0	0	0	0
s__Lactobacillus_phage_Ldl1	5.9e-08	0	0	3.99e-08	6.88e-08	0	0	0	0	2.52e-08	0	0	0	0	0
s__Lactobacillus_sakei_subsp_carnosus	1.97e-08	2.55e-07	1.08e-06	1.99e-07	2.98e-07	8.06e-08	2.98e-07	9.07e-08	4.54e-07	2.52e-08	1.93e-07	1.64e-07	3.03e-07	2.2e-07	9.67e-08
s__Chlamydia_muridarum	9.83e-08	6.59e-07	2.25e-08	4.19e-07	2.29e-08	0	1.37e-07	6.58e-07	1.01e-07	2.52e-08	4.82e-08	2.84e-06	2.27e-07	9.78e-08	1.69e-07
s__Faecalitalea_cylindroides	9.22e-05	4.17e-05	8.35e-05	0.000100744	3.27e-05	0.00071541	1.97e-05	0.000741707	0.000641337	0.000255026	0.000311114	0.000423435	7.97e-05	0.000272823	0.000337964
s__Arthrobacter_sp_35/47	2.36e-07	6.38e-08	0	3.99e-08	4.59e-08	1.08e-07	1.14e-07	2.95e-07	1.51e-07	5.03e-08	1.21e-07	2.26e-07	5.05e-08	2.93e-07	3.14e-07
s__uncultured_bacterium_scaffold00090	1.67e-05	6.17e-06	4.48e-06	9.53e-06	2.2e-05	8.9e-06	1.88e-05	5.99e-06	1.57e-05	1.39e-05	7.33e-06	8.07e-06	9.78e-06	1.2e-05	1.36e-05
s__Klebsiella_sp_OBRC7	1.18e-07	2.13e-08	2.25e-08	3.99e-08	0	3.76e-07	4.58e-08	1.02e-06	7.81e-07	2.52e-08	1.93e-07	6.16e-07	2.78e-07	9.78e-08	5.56e-07
s__Avibacterium_paragallinarum	4.62e-06	8.49e-06	5.47e-06	7.34e-06	3.23e-06	7.02e-06	5.68e-06	4.92e-06	2.95e-06	7.2e-06	6.56e-06	3.78e-06	1.03e-05	4.69e-06	6.16e-06
s__Fusobacterium_sp_CM1	6.29e-07	5.53e-07	4.28e-07	1.48e-06	1.63e-06	4.3e-07	1.03e-06	4.31e-07	7.06e-07	4.53e-07	6.99e-07	6.78e-07	5.81e-07	7.33e-07	2.68e-06
s__Opisthorchis_viverrini	0	0	0	0	0	2.69e-08	2.29e-08	0	0	5.03e-08	0	0	0	2.44e-08	0
s__Desulfitibacter_sp_BRH_c19	6.29e-06	6.74e-06	5.04e-06	8.78e-06	5.07e-06	7.47e-06	6.07e-06	8.41e-06	1.09e-05	4.81e-06	8.58e-06	1.02e-05	7.58e-06	1.05e-05	8.75e-06
s__Candidatus_Thermochlorobacteriaceae_bacterium_GBChlB	2.61e-06	5.98e-06	4.37e-06	5.03e-06	1.83e-06	6.4e-06	3.34e-06	5.08e-06	3.93e-06	3.35e-06	3.33e-06	5.3e-06	5.56e-06	3.74e-06	4.57e-06
s__fungal_sp_No11243	3.93e-07	1.91e-07	3.15e-07	1.8e-07	3.67e-07	8.06e-08	3.89e-07	2.49e-07	2.77e-07	2.52e-07	1.45e-07	2.05e-07	7.58e-08	1.47e-07	7.25e-08
s__Pseudomonas_sp_10-1B	1.97e-08	2.13e-08	0	9.97e-08	2.29e-08	0	4.58e-08	2.27e-08	2.52e-08	0	0	4.11e-08	2.53e-08	2.44e-08	2.42e-08
s__Caulobacter_sp_Root342	0	0	2.25e-08	0	0	0	0	0	0	0	0	2.05e-08	0	0	0
s__Necropsobacter_massiliensis	8.26e-07	2.02e-06	1.06e-06	1.82e-06	1.15e-07	2.02e-06	9.62e-07	1.29e-06	7.06e-07	1.11e-06	1.33e-06	1.09e-06	2.32e-06	1.17e-06	2.13e-06
s__candidate_divison_MSBL1_archaeon_SCGC-AAA259D14	0	0	0	0	0	0	0	0	0	0	0	2.05e-08	0	0	0
s__Rhodococcus_sp_JG-3	0	2.13e-08	0	0	0	0	0	0	0	0	0	0	0	0	0
s__Rhodobacter_capsulatus	7.86e-07	4.25e-07	9.46e-07	6.38e-07	5.5e-07	1.48e-06	1.12e-06	3.08e-06	1.99e-06	6.54e-07	7.47e-07	1.79e-06	6.82e-07	9.04e-07	1.35e-06
s__Echinicola_vietnamensis	3.84e-05	4.72e-05	4.66e-05	4.66e-05	4.24e-05	5.14e-05	4.53e-05	4.64e-05	3.77e-05	4.19e-05	3.74e-05	4.47e-05	5.89e-05	3.22e-05	4.8e-05
s__Aeromonas_finlandiensis	9.83e-08	2.76e-07	6.75e-08	1.2e-07	9.17e-08	2.69e-07	6.87e-08	2.72e-07	5.04e-08	1.76e-07	9.64e-08	2.05e-08	1.77e-07	1.71e-07	1.93e-07
s__Planococcus_donghaensis	7.67e-07	4.68e-07	6.3e-07	1.16e-06	5.27e-07	1.42e-06	6.41e-07	1.47e-06	1.34e-06	4.78e-07	1.52e-06	1.36e-06	5.56e-07	7.58e-07	8.46e-07
s__Phycisphaerae_bacterium_SM23_30	2.28e-06	1.45e-06	4.5e-06	2.81e-06	7.11e-07	1.45e-06	3.73e-06	2.04e-06	1.74e-06	2.19e-06	1.08e-06	1.52e-06	1.14e-06	2.2e-06	1.74e-06
s__Mesorhizobium_sp_Root157	2.16e-07	1.06e-07	9.01e-08	5.98e-08	2.29e-08	0	2.29e-08	3.63e-07	1.76e-07	7.55e-08	1.45e-07	2.67e-07	2.27e-07	2.44e-07	3.63e-07
s__Streptomyces_olivochromogenes	2.16e-07	1.7e-07	2.25e-07	3.39e-07	2.29e-07	8.06e-08	3.89e-07	1.59e-07	2.02e-07	2.27e-07	7.23e-08	1.23e-07	2.02e-07	9.78e-08	9.67e-08
s__Methylobacterium_sp_B34	2.56e-07	2.55e-07	5.63e-07	1.99e-07	9.17e-08	8.06e-08	3.21e-07	6.8e-08	2.02e-07	3.78e-07	1.45e-07	1.03e-07	1.26e-07	4.64e-07	7.25e-08
s__Pseudomonas_savastanoi	4.33e-07	1.7e-07	1.01e-06	4.79e-07	4.82e-07	1.88e-07	5.95e-07	3.18e-07	7.81e-07	5.03e-07	1.93e-07	5.34e-07	2.02e-07	3.18e-07	1.69e-07
s__Sphingobium_sp_ba1	1.97e-07	2.98e-07	2.93e-07	5.78e-07	3.67e-07	1.16e-06	7.79e-07	9.07e-07	4.79e-07	4.78e-07	3.86e-07	6.16e-07	4.55e-07	3.18e-07	4.83e-07
s__Leifsonia_sp_Root112D2	1.77e-07	6.38e-08	1.35e-07	2.79e-07	9.17e-08	2.69e-08	6.87e-08	1.36e-07	7.56e-08	1.01e-07	7.23e-08	6.16e-08	2.27e-07	1.47e-07	1.21e-07
s__Achromobacter_sp_RTa	1.57e-07	4.25e-08	6.75e-08	9.97e-08	1.38e-07	5.38e-08	1.14e-07	2.27e-08	2.52e-08	1.01e-07	1.93e-07	8.22e-08	1.01e-07	1.71e-07	0
s__archaeon_GW2011_AR6	7.86e-08	4.25e-08	6.75e-08	7.98e-08	1.38e-07	2.15e-07	0	2.27e-07	7.56e-08	2.27e-07	2.41e-07	4.31e-07	0	7.33e-08	9.67e-08
s__Firmicutes_bacterium_CAG536	3.63e-05	1.5e-05	3.36e-05	3.74e-05	8.39e-06	0.000329333	3.96e-06	0.000334302	0.000286262	0.000111947	0.000134781	0.000186376	3.46e-05	0.000115744	0.000155121
s__Francisella_noatunensis_subsp_orientalis	0	0	0	3.99e-08	2.29e-08	0	0	0	2.52e-08	0	0	2.05e-08	2.53e-08	0	0
s__Gossypium_hirsutum	1.77e-07	0	2.25e-08	1.99e-07	1.38e-07	1.08e-07	1.14e-07	6.8e-08	1.26e-07	1.76e-07	2.17e-07	1.44e-07	1.77e-07	2.44e-07	7.25e-08
s__Promicromonosporaceae_bacterium_W15	1.4e-06	1.91e-06	1.15e-06	1.93e-06	5.04e-07	1.45e-06	2.72e-06	1.27e-06	7.56e-07	1.03e-06	1.18e-06	9.04e-07	2.38e-06	1.98e-06	1.74e-06
s__Kyrpidia_tusciae	2.18e-06	2e-06	2.07e-06	2.39e-06	1.03e-06	2.69e-06	2.29e-06	2.15e-06	3.53e-06	1.56e-06	1.95e-06	2.67e-06	2.38e-06	3.1e-06	2.61e-06
s__Lichtheimia_ramosa	3.54e-07	8.51e-08	2.25e-07	3.19e-07	3.21e-07	3.23e-07	3.66e-07	1.13e-07	7.56e-08	4.53e-07	2.17e-07	1.23e-07	2.78e-07	1.22e-07	1.45e-07
s__Parabacteroides_sp_ASF519	2.71e-05	5.67e-05	3.13e-05	5.04e-05	1.62e-05	5.44e-05	3.21e-05	5.4e-05	3.7e-05	3.53e-05	3.54e-05	4.76e-05	6.43e-05	3.91e-05	3.59e-05
s__uncultured_delta_proteobacterium_HF0010_01J10	1e-06	3.19e-07	7.2e-07	1.6e-07	5.5e-07	1.16e-06	7.33e-07	3.63e-07	6.05e-07	8.31e-07	8.44e-07	1.03e-06	3.29e-07	8.07e-07	5.8e-07
s__Crepidula_fornicata	0	0	0	0	0	0	0	0	0	0	0	0	0	0	0
s__Coprococcus_eutactus_CAG665	6.84e-06	3.28e-06	4.77e-06	2.42e-05	8.07e-06	4.33e-06	8.36e-06	7.03e-06	9.2e-06	3.72e-06	1.2e-05	8.11e-06	3.94e-06	1.58e-05	8.7e-06
s__Pantoea_stewartii_subsp_stewartii	1.97e-08	0	0	0	0	0	0	0	0	0	0	0	0	0	0
s__Nitrosospira_multiformis	9.04e-07	1.62e-06	8.78e-07	2.49e-06	1.22e-06	1.64e-06	1.28e-06	1.29e-06	1.91e-06	1.33e-06	1.78e-06	1.09e-06	1.84e-06	3.72e-06	2.05e-06
s__Methanobrevibacter_smithii	2.73e-06	1.77e-06	2.41e-06	4.79e-06	2.22e-06	4.03e-06	2.98e-06	4.9e-06	2.87e-06	2.16e-06	2.84e-06	2.88e-06	1.39e-06	3.69e-06	2.18e-06
s__Novosphingobium_nitrogenifigens	2.56e-07	1.7e-07	3.15e-07	5.78e-07	1.61e-07	4.57e-07	2.06e-07	2.95e-07	4.79e-07	3.02e-07	2.17e-07	3.08e-07	2.53e-07	2.2e-07	3.14e-07
s__Paenibacillus_phage_phiIBB_Pl23	1.97e-07	2.13e-08	0	1.2e-07	6.88e-08	8.06e-08	1.14e-07	6.8e-08	5.04e-08	0	2.17e-07	6.16e-08	5.05e-08	9.78e-08	0
s__Pseudogulbenkiania_sp_MAI-1	1.65e-06	1.96e-06	1.28e-06	1.99e-06	1.77e-06	2.23e-06	1.92e-06	1.84e-06	3.63e-06	1.48e-06	3.09e-06	2.03e-06	2.53e-06	2.84e-06	4.18e-06
s__Pseudomonas_sp_CMAA1215	2.16e-07	1.49e-07	1.13e-07	2.19e-07	1.61e-07	1.88e-07	9.16e-08	3.18e-07	1.51e-07	3.27e-07	4.58e-07	3.08e-07	2.53e-07	4.16e-07	3.14e-07
s__Bartonella_apis	0	0	0	1.99e-08	0	0	0	0	0	0	0	2.05e-08	0	4.89e-08	0
s__Mastigocoleus_testarum	8.85e-07	2.98e-07	6.3e-07	9.77e-07	1.15e-06	6.72e-07	8.7e-07	7.26e-07	8.06e-07	7.55e-07	1.28e-06	9.86e-07	5.05e-07	9.78e-07	1.04e-06
s__Erysipelotrichaceae_bacterium_6_1_45	2.22e-05	1.37e-05	2.86e-05	4.36e-05	3.52e-05	1.5e-05	3.28e-05	1.71e-05	2.6e-05	1.28e-05	3.49e-05	1.58e-05	9.53e-06	7.64e-05	2.35e-05
s__Candidatus_Uhrbacteria_bacterium_GW2011_GWA2_41_10	1.38e-07	0	1.8e-07	9.97e-08	2.29e-07	8.06e-08	9.16e-07	0	2.27e-07	1.26e-07	2.65e-07	2.05e-08	1.77e-07	1.47e-07	1.69e-07
s__Paraburkholderia_xenovorans	1.77e-07	2.34e-07	1.35e-07	1.99e-07	2.75e-07	1.88e-07	6.87e-08	7.71e-07	7.56e-08	7.55e-08	0	4.93e-07	1.01e-07	2.93e-07	3.14e-07
s__Pseudomonas_azotifigens	2.75e-07	1.49e-07	1.35e-07	1.2e-07	3.21e-07	2.69e-07	1.83e-07	2.27e-07	1.76e-07	3.02e-07	2.89e-07	1.23e-07	2.78e-07	4.64e-07	3.63e-07
s__Cucumis_sativus	7.86e-08	4.25e-08	4.5e-08	5.98e-08	6.88e-08	0	2.29e-08	2.27e-08	5.04e-08	7.55e-08	1.69e-07	0	7.58e-08	2.44e-08	2.42e-08
s__Rickettsia_sibirica	5.9e-08	0	0	1.99e-08	4.59e-08	5.38e-08	0	0	0	2.52e-08	9.64e-08	6.16e-08	2.53e-08	2.44e-08	2.42e-08
s__Salmonella_virus_FSLSP030	0	0	0	0	0	0	0	0	0	0	0	2.05e-08	0	0	0
s__Ruthenibacterium_lactatiformans	4.24e-05	3.93e-05	3.7e-05	0.000127172	6.62e-05	6.81e-05	5.8e-05	5.47e-05	0.000248618	2.86e-05	0.000106388	6.58e-05	7.77e-05	0.000217212	0.000107313
s__Bacillus_cecembensis	2.44e-06	1.02e-06	1.44e-06	3.57e-06	3.3e-06	2.2e-06	2.27e-06	1.7e-06	3.02e-06	6.29e-07	3.57e-06	2.42e-06	1.19e-06	5.89e-06	3.05e-06
s__Paenibacillus_sp_Dex40-8	0	2.13e-08	0	0	0	2.69e-08	0	0	0	0	0	0	0	0	0
s__Aggregatibacter_aphrophilus	1.26e-06	1.02e-06	1.06e-06	1.28e-06	1.1e-06	1.34e-06	4.35e-07	1.68e-06	1.18e-06	6.54e-07	8.19e-07	1.48e-06	9.35e-07	1.22e-06	8.22e-07
s__Salmonella_bongori	5.9e-07	2.34e-07	3.38e-07	7.18e-07	2.29e-07	8.06e-08	1.83e-07	3.18e-07	2.02e-07	4.53e-07	3.13e-07	2.26e-07	3.79e-07	2.93e-07	2.9e-07
s__uncultured_bacterium_fosmid_pJB102C1	1.21e-05	8.98e-06	1.29e-05	8.18e-06	1.1e-05	6.42e-06	1.13e-05	6.1e-06	7.58e-06	1.39e-05	7.95e-06	6.16e-06	7.71e-06	6.6e-06	6.07e-06
s__uncultured_Thermoanaerobacterium_sp	3.93e-08	0	0	9.97e-08	6.88e-08	5.38e-08	2.29e-08	0	2.52e-08	0	7.23e-08	2.05e-08	1.26e-07	2.44e-08	1.93e-07
s__uncultured_soil_bacterium	1.08e-06	6.38e-08	1.08e-06	4.99e-07	8.26e-07	5.64e-07	2.36e-06	4.31e-07	7.06e-07	7.05e-07	3.13e-07	7.6e-07	5.81e-07	7.58e-07	1.69e-07
s__Vibrio_phage_eugene_12A10	0	0	0	0	0	0	0	0	2.52e-08	0	0	0	0	0	0
s__Bacillus_phage_vB_BpuM-BpSp	3.93e-08	0	0	1.4e-07	6.88e-08	2.15e-07	2.29e-08	6.8e-07	0	0	4.82e-08	4.11e-08	2.53e-08	9.78e-08	0
s__Microgenomates_group_bacterium_GW2011_GWB1_44_8	1.77e-07	0	2.48e-07	1.99e-08	1.83e-07	2.69e-08	9.16e-08	2.27e-08	2.77e-07	7.55e-08	1.21e-07	2.05e-08	2.53e-08	9.78e-08	0
s__Mangrovibacter_phragmitis	1.53e-06	2.19e-06	6.3e-07	1.22e-06	1.51e-06	8.87e-07	2.2e-06	7.71e-07	1.26e-06	1.89e-06	4.82e-07	7.4e-07	9.1e-07	8.8e-07	8.22e-07
s__Enterococcus_virus_BC611	0	2.13e-08	0	0	0	0	0	0	0	0	0	0	0	4.89e-08	0
s__Burkholderia_sp_SJ98	0	0	0	5.98e-08	0	0	0	0	0	5.03e-08	2.41e-08	0	2.53e-08	2.44e-08	0
s__Candidatus_Moranbacteria_bacterium_GW2011_GWD2_38_7	0	0	9.01e-08	0	0	5.38e-08	0	0	0	0	4.82e-08	0	0	0	0
s__Komagataeibacter_oboediens	3.93e-08	0	0	0	2.29e-08	2.69e-08	3.21e-07	2.27e-08	5.04e-08	0	2.41e-08	0	0	4.89e-08	4.83e-08
s__Clostridium_botulinum	0.000145124	0.000106258	0.000105145	0.000254863	0.000163566	0.000147302	0.000137552	0.000147588	0.000181065	9.98e-05	0.000239554	0.000146336	0.000120688	0.000283089	0.000203919
s__Pseudomonas_phage_Pf-10	0	0	0	3.99e-08	0	0	0	0	7.56e-08	0	2.41e-08	0	0	2.44e-08	0
s__Leptospira_yanagawae	1.18e-06	2.28e-06	1.55e-06	2.33e-06	4.13e-07	2.28e-06	1.74e-06	1.32e-06	8.06e-07	1.66e-06	2.1e-06	1.03e-06	2.96e-06	1.61e-06	2.01e-06
s__Eikenella_corrodens	2.91e-06	3.91e-06	3.15e-06	4.21e-06	2.02e-06	3.9e-06	3e-06	1.43e-06	2.09e-06	3.7e-06	2.19e-06	2.98e-06	4.37e-06	2.57e-06	3.21e-06
s__Citromicrobium_sp_JL31	0	0	0	0	0	0	2.29e-08	0	0	0	0	0	0	0	0
s__Acidithiobacillales_bacterium_SM23_46	4.91e-07	4.47e-07	2.25e-07	5.98e-07	6.42e-07	3.23e-07	5.95e-07	3.63e-07	5.04e-07	6.04e-07	2.89e-07	6.57e-07	1.77e-07	2.44e-07	4.35e-07
s__Lachnoanaerobaculum_sp_OBRC5-5	6.47e-06	3.53e-06	2.88e-06	1.63e-05	6.4e-06	5.51e-06	5.22e-06	8.35e-06	7.48e-06	5.03e-06	9.67e-06	5.05e-06	3.82e-06	1.39e-05	1.22e-05
s__Hydrogenobacter_hydrogenophilus	0	0	0	0	0	0	2.29e-08	0	0	0	0	0	0	2.44e-08	0
s__Thermithiobacillus_tepidarius	1.26e-06	8.93e-07	1.33e-06	1.34e-06	5.5e-07	5.91e-07	1.05e-06	7.94e-07	5.04e-07	1.21e-06	5.54e-07	6.37e-07	7.83e-07	8.8e-07	5.8e-07
s__Haloferax_sp_SB3	3.93e-08	0	2.25e-08	5.98e-08	0	0	0	2.27e-08	0	0	4.82e-08	2.05e-08	0	2.44e-08	2.42e-08
s__Thioalkalivibrio_sp_ALMg13-2	9.83e-08	6.38e-08	1.8e-07	1.99e-07	1.61e-07	1.08e-07	6.87e-08	6.8e-08	7.56e-08	2.77e-07	4.82e-08	1.44e-07	1.01e-07	2.44e-08	0
s__Candidatus_Magasanikbacteria_bacterium_GW2011_GWC2_41_17	1.2e-06	4.89e-07	6.3e-07	4.79e-07	1.03e-06	1.18e-06	7.79e-07	1.38e-06	1.11e-06	6.54e-07	6.99e-07	9.66e-07	9.86e-07	6.84e-07	1.52e-06
s__Jonquetella_sp_BV3C21	1.18e-07	0	4.5e-08	5.98e-08	9.17e-08	2.69e-08	1.83e-07	6.58e-07	1.01e-07	2.52e-08	2.65e-07	8.22e-08	1.01e-07	1.47e-07	4.83e-08
s__Prevotella_sp_CAG755	0.00130291	0.00206288	0.00110033	0.000451066	0.000559859	0.000865803	0.000586206	0.000730684	0.000520619	0.000874406	0.000665034	0.00066265	0.000492202	0.000381673	0.000726659
s__Rattus_tanezumi	0	0	0	0	0	5.38e-08	0	0	0	0	0	0	0	2.44e-08	0
s__Asticcacaulis_sp_AC466	9.24e-07	1.3e-06	1.37e-06	6.58e-07	2.52e-07	1.67e-06	1.28e-06	1.22e-06	1.34e-06	5.54e-07	3.37e-07	1.58e-06	3.03e-07	8.8e-07	4.35e-07
s__Vanderwaltozyma_polyspora	4.13e-07	1.7e-07	5.63e-07	1.6e-07	8.71e-07	8.06e-08	6.18e-07	2.27e-08	1.51e-07	2.77e-07	1.45e-07	6.16e-08	5.05e-08	1.22e-07	7.25e-08
s__Streptomyces_sp_NRRL_F-5650	3.54e-07	6.38e-07	6.75e-07	4.19e-07	9.17e-08	1.08e-07	2.06e-07	4.54e-07	3.53e-07	1.01e-07	2.17e-07	2.26e-07	8.84e-07	5.62e-07	1.45e-07
s__Rhizobium_mesoamericanum	4.91e-07	2.34e-07	5.4e-07	2.79e-07	6.19e-07	1.08e-06	4.35e-07	8.17e-07	1.31e-06	1.76e-07	1.93e-07	1.34e-06	4.55e-07	4.4e-07	3.38e-07
s__Bradyrhizobium_sp_CCBAU_43298	1.38e-07	1.06e-07	1.13e-07	2.19e-07	1.83e-07	0	9.16e-08	9.07e-08	1.51e-07	1.51e-07	1.69e-07	2.67e-07	2.02e-07	0	3.38e-07
s__Mycobacterium_kansasii	6.88e-07	4.04e-07	1.04e-06	3.99e-07	8.03e-07	7.53e-07	7.33e-07	7.03e-07	7.31e-07	4.78e-07	3.37e-07	5.55e-07	5.31e-07	4.89e-07	4.35e-07
s__Candidatus_Peregrinibacteria_bacterium_GW2011_GWA2_54_9	1.97e-08	0	0	0	0	0	0	0	0	0	0	0	5.05e-08	0	0
s__Candidatus_Thiomargarita_nelsonii	5.54e-06	3.91e-06	4.64e-06	6.02e-06	3.55e-06	5.24e-06	6.07e-06	4.24e-06	4.38e-06	4.4e-06	4.87e-06	4.87e-06	5.46e-06	4.47e-06	4.66e-06
s__Prochlorococcus_phage_P-SSM7	1.97e-08	0	0	0	0	0	6.87e-08	4.54e-08	0	0	0	0	0	0	0
s__Plasmodiophora_brassicae	3.93e-08	6.38e-08	0	7.98e-08	4.59e-08	0	6.87e-08	0	7.56e-08	5.03e-08	0	2.05e-08	0	7.33e-08	7.25e-08
s__Nitrosospira_lacus	3.85e-06	2.53e-06	3.76e-06	2.49e-06	7.93e-06	1.45e-06	3.21e-07	1.34e-06	3.25e-06	2.77e-06	2.87e-06	6.98e-07	2.27e-06	2.96e-06	2.05e-06
s__uncultured_bacterium_A1Q1_fos_565	0	0	0	0	4.59e-08	0	0	0	0	0	0	0	0	0	0
s__Candidatus_Collierbacteria_bacterium_GW2011_GWC2_44_13	2.36e-07	2.13e-08	2.7e-07	1.6e-07	1.38e-07	8.06e-08	3.43e-07	1.13e-07	2.02e-07	1.76e-07	7.23e-08	1.64e-07	1.77e-07	4.89e-08	7.25e-08
s__Halomonas_halodenitrificans	7.08e-07	2.76e-07	3.6e-07	1.8e-07	2.06e-07	7.53e-07	4.35e-07	7.48e-07	5.54e-07	3.27e-07	5.54e-07	4.93e-07	1.01e-06	4.89e-07	6.53e-07
s__Wheat_blue_dwarf_phytoplasma	1.97e-08	0	0	0	0	0	0	1.13e-07	2.52e-08	0	0	0	0	2.44e-08	0
s__Rhodopirellula_sp_SWK7	4.25e-06	3.96e-06	3.17e-06	1.99e-06	2.8e-06	4.87e-06	3.6e-06	6.37e-06	6.48e-06	3.88e-06	2.82e-06	5.34e-06	3.87e-06	2.98e-06	4.35e-06
s__Caballeronia_temeraria	2.95e-07	1.06e-07	3.6e-07	3.59e-07	3.21e-07	1.08e-07	3.21e-07	9.07e-08	1.01e-07	1.01e-07	7.23e-08	6.16e-08	1.77e-07	0	1.45e-07
s__Micromonospora_chersina	0	0	0	0	0	0	6.87e-08	0	0	0	0	0	0	0	0
s__Methanosarcina_barkeri	4.19e-06	3.72e-06	4.01e-06	4.05e-06	3.42e-06	1.94e-06	3.14e-06	2.04e-06	3.53e-06	1.84e-06	3.59e-06	1.83e-06	1.59e-06	5.92e-06	7.78e-06
s__Methanobrevibacter_arboriphilus	7.67e-07	3.62e-07	7.43e-07	1.4e-06	8.71e-07	6.45e-07	1.05e-06	6.12e-07	4.54e-07	2.77e-07	6.27e-07	2.67e-07	4.3e-07	1e-06	6.04e-07
s__Kingella_oralis	1.89e-06	1.91e-06	2.79e-06	1.95e-06	1.17e-06	7.88e-06	2.24e-06	5.47e-06	6.53e-06	4.15e-06	3.62e-06	4.62e-06	2.65e-06	2.93e-06	3.34e-06
s__Subdoligranulum_sp_4_3_54A2FAA	6.75e-05	6.61e-05	6.24e-05	0.000162535	0.000116558	0.000107278	7.42e-05	8.32e-05	0.000373217	4.15e-05	0.000256185	0.000110856	0.000118237	0.000300762	0.000211871
s__Butyricimonas_virosa	0.00062245	0.000750205	0.000722976	0.000605683	0.000572379	0.000711673	0.000672924	0.000793194	0.000625161	0.000645077	0.000549439	0.000650365	0.000893509	0.000524403	0.000805404
s__Sphingobacterium_sp_IITKGP-BTPF85	2.14e-05	3.41e-05	2.5e-05	2.43e-05	2.18e-05	2.91e-05	2.71e-05	1.85e-05	2.07e-05	3.06e-05	2.02e-05	2.26e-05	3.46e-05	1.82e-05	2.45e-05
s__Limnohabitans_sp_103DPR2	5.9e-07	2.76e-07	6.53e-07	6.38e-07	6.19e-07	4.3e-07	2.06e-07	2.49e-07	5.29e-07	7.05e-07	4.82e-07	5.34e-07	4.3e-07	3.67e-07	3.63e-07
s__Deinococcus_deserti	7.86e-07	6.59e-07	5.85e-07	9.77e-07	5.27e-07	1.1e-06	4.81e-07	1.52e-06	1.69e-06	8.05e-07	1.08e-06	1.31e-06	4.04e-07	2.3e-06	1.18e-06
s__Marinitoga_sp_1197	7.08e-07	6.38e-08	9.01e-08	6.58e-07	4.36e-07	4.57e-07	2.75e-07	1.13e-07	1.51e-07	5.03e-08	4.34e-07	3.49e-07	1.77e-07	5.87e-07	1.45e-07
s__Marinobacter_santoriniensis	1.57e-07	1.7e-07	2.48e-07	2.19e-07	5.27e-07	2.69e-07	1.37e-07	7.71e-07	3.02e-07	4.28e-07	4.58e-07	1.44e-07	2.53e-07	3.91e-07	1.69e-07
s__Staphylococcus_virus_Remus	0	0	0	0	2.29e-08	5.38e-08	0	0	5.04e-08	0	0	0	0	9.78e-08	0
s__Pseudomonas_sp_Root562	3.93e-08	0	0	0	2.29e-08	2.69e-08	2.29e-08	0	0	0	2.41e-08	0	0	0	2.42e-08
s__Escherichia_virus_SUSP1	0	0	0	0	0	0	0	0	0	0	0	0	0	0	2.42e-08
s__Anaerofustis_stercorihominis	4.48e-05	4.74e-05	3.37e-05	7.51e-05	4.62e-05	5.94e-05	5.28e-05	7.57e-05	8.15e-05	3.6e-05	7.62e-05	5.84e-05	4.02e-05	0.000119581	6.36e-05
s__Pseudarthrobacter_phenanthrenivorans	3.93e-07	1.6e-06	6.53e-07	1.1e-06	9.17e-08	1.16e-06	1.6e-07	4.08e-07	1.51e-07	8.05e-07	1.64e-06	9.86e-07	1.47e-06	7.58e-07	1.04e-06
s__Caldithrix_abyssi	1.27e-05	1.24e-05	1.38e-05	1.2e-05	9.93e-06	1.59e-05	1.29e-05	1.62e-05	1.64e-05	1.3e-05	1.11e-05	1.54e-05	1.26e-05	1.05e-05	1.23e-05
s__Verruconis_gallopava	3.93e-08	2.13e-08	2.25e-08	7.98e-08	6.88e-08	0	2.29e-07	1.13e-07	2.52e-08	0	7.23e-08	0	0	2.44e-08	7.25e-08
s__Fluoribacter_bozemanae	5.9e-08	0	0	1.2e-07	4.59e-08	0	6.87e-08	4.54e-08	7.56e-08	1.01e-07	4.82e-08	2.05e-08	2.53e-08	1.96e-07	9.67e-08
s__Algiphilus_aromaticivorans	2.99e-06	2.79e-06	3.04e-06	2.35e-06	3.65e-06	1.77e-06	2.38e-06	1.79e-06	1.54e-06	1.96e-06	2.55e-06	1.42e-06	2.78e-06	1.93e-06	2.18e-06
s__Hydrogenovibrio_sp_Milos-T1	7.86e-07	1e-06	6.3e-07	1.42e-06	9.86e-07	7.26e-07	6.87e-07	4.54e-07	9.83e-07	1.11e-06	1.4e-06	5.34e-07	1.29e-06	1.74e-06	5.32e-07
s__Lactobacillus_mindensis	4.13e-07	3.19e-07	3.6e-07	7.38e-07	5.04e-07	6.72e-07	5.95e-07	5.22e-07	3.28e-07	5.54e-07	5.06e-07	6.78e-07	5.56e-07	4.4e-07	1.69e-07
s__Pseudoalteromonas_sp_BSi20429	0	1.49e-07	0	1.2e-07	2.29e-08	0	4.58e-08	0	0	0	0	0	0	7.33e-08	0
s__candidate_division_TM6_bacterium_GW2011_GWF2_28_16	4.91e-07	5.1e-07	6.75e-07	3.39e-07	2.06e-07	1.08e-07	2.52e-07	2.27e-07	2.27e-07	1.26e-07	1.93e-07	2.67e-07	2.78e-07	1.22e-07	4.83e-08
s__Halomonas_lutea	5.7e-07	3.62e-07	3.6e-07	4.59e-07	5.5e-07	5.38e-07	5.27e-07	6.58e-07	4.28e-07	5.29e-07	4.82e-07	1.85e-07	3.03e-07	3.67e-07	2.66e-07
s__uncultured_bacterium_Contigcl_1787	1.53e-06	7.87e-07	4.73e-07	1.58e-06	8.48e-07	7.26e-07	7.79e-07	2.36e-06	1.84e-06	2.27e-07	1.49e-06	1.17e-06	1.04e-06	1.88e-06	2.1e-06
s__Listeria_floridensis	2.48e-06	2.94e-06	2.68e-06	3.75e-06	1.15e-06	2.77e-06	3.34e-06	2.72e-06	2.72e-06	3.57e-06	3.37e-06	2.51e-06	4.47e-06	3.4e-06	3.63e-06
s__Thermopetrobacter_sp_TC1	5.31e-07	1.91e-07	3.6e-07	6.98e-07	4.82e-07	5.11e-07	4.12e-07	2.95e-07	4.54e-07	2.52e-07	3.13e-07	5.96e-07	5.56e-07	7.09e-07	3.63e-07
s__Acanthamoeba_polyphaga_lentillevirus	0	0	0	1.99e-08	0	0	0	0	0	0	0	0	0	0	0
s__Bacillus_sp_GL1	0	0	0	0	0	0	0	0	0	0	0	0	0	0	0
s__Staphylococcus_aureus_subsp_aureus	3.4e-05	1.7e-05	5.62e-05	2.85e-05	4.28e-05	7.04e-05	2.81e-05	5.66e-05	5.81e-05	3.59e-05	4.49e-05	3.41e-05	1.86e-05	3.94e-05	3.62e-05
s__uncultured_Rhizobium_sp_HF0500_35F13	0	0	0	1.99e-08	0	0	0	0	0	0	0	0	0	0	0
s__Plasmodium_sp_DRC-Itaito	0	0	0	0	0	0	0	0	0	0	0	0	2.53e-08	0	0
s__Legionella_anisa	6.51e-06	1.37e-05	1.22e-05	8.24e-06	4.88e-06	5.21e-06	7.69e-06	5.47e-06	5.04e-06	1.41e-05	7.4e-06	6.33e-06	9.17e-06	4.72e-06	5.49e-06
s__Candidatus_Shapirobacteria_bacterium_GW2011_GWF2_37_20	1.18e-07	6.38e-08	1.13e-07	9.97e-08	2.29e-08	5.38e-08	1.14e-07	2.27e-08	2.52e-08	0	0	0	2.53e-08	7.33e-08	0
s__Alcanivorax_pacificus	6.09e-07	6.17e-07	6.98e-07	8.18e-07	1.31e-06	6.18e-07	1.1e-06	1.18e-06	1.08e-06	7.3e-07	6.03e-07	8.01e-07	1.04e-06	6.84e-07	1.28e-06
s__Kitasatospora_azatica	4.72e-07	1.28e-07	3.15e-07	2.39e-07	3.21e-07	2.69e-07	4.35e-07	3.4e-07	4.03e-07	1.26e-07	2.17e-07	8.22e-08	2.53e-07	1.71e-07	1.21e-07
s__Streptomyces_sp_NRRL_F-6628	0	0	0	0	2.29e-08	0	0	0	0	0	0	0	2.53e-08	0	0
s__Acinetobacter_sp_243_ASPC	0	0	0	0	0	0	0	2.27e-08	0	0	0	0	0	0	0
s__Rothia_dentocariosa	9.44e-07	3.19e-07	1.15e-06	9.37e-07	8.94e-07	5.11e-07	6.18e-07	1.07e-06	7.81e-07	6.54e-07	8.44e-07	5.34e-07	5.05e-07	1.42e-06	9.18e-07
s__Neptunomonas_antarctica	3.34e-07	4.68e-07	5.18e-07	5.98e-07	3.44e-07	4.57e-07	4.12e-07	8.17e-07	5.04e-07	4.28e-07	3.62e-07	5.55e-07	6.06e-07	3.42e-07	6.77e-07
s__Streptacidiphilus_rugosus	0	8.51e-08	0	5.98e-08	6.88e-08	1.88e-07	2.29e-08	0	1.26e-07	5.03e-08	2.41e-08	2.05e-08	1.77e-07	1.22e-07	9.67e-08
s__Rhodanobacter_sp_FW510-R10	0	0	0	0	2.29e-08	0	0	0	0	0	0	0	0	0	0
s__Sphaerobacter_thermophilus	2.36e-06	1e-06	2.32e-06	1.7e-06	2.87e-06	2.23e-06	2.54e-06	2.52e-06	3.12e-06	1.66e-06	1.59e-06	3.23e-06	2.05e-06	2.66e-06	2.83e-06
s__Tokudaia_muenninki	0	0	0	0	0	0	0	0	0	0	0	0	0	0	0
s__Candidatus_Magnetomorum_sp_HK-1	3.46e-05	1.92e-05	1.3e-05	1.69e-05	3.57e-05	1.75e-05	3.21e-05	9.84e-06	2.97e-05	2.91e-05	1.11e-05	1.57e-05	2.47e-05	1.43e-05	1.85e-05
s__Cetobacterium_somerae	7.73e-06	5.49e-06	7.54e-06	1.04e-05	6.21e-06	6.02e-06	7.58e-06	3.95e-06	6.8e-06	6.24e-06	7.28e-06	5.05e-06	5e-06	6.04e-06	3.94e-06
s__Aggregatibacter_segnis	1.77e-07	2.55e-07	1.8e-07	5.19e-07	1.83e-07	2.15e-07	3.66e-07	4.54e-07	1.26e-07	1.76e-07	9.64e-08	1.85e-07	5.05e-08	1.71e-07	3.38e-07
s__Fischerella_ambigua	3.93e-08	0	0	1.99e-08	0	0	0	0	2.52e-08	0	2.41e-08	0	0	0	0
s__Acinetobacter_sp_NIPH_298	1.77e-07	8.51e-08	2.03e-07	1.2e-07	6.88e-08	8.06e-08	2.29e-07	6.8e-08	2.52e-08	1.76e-07	2.41e-08	6.16e-08	5.05e-08	1.71e-07	2.42e-08
s__uncultured_archaeon_GZfos3D4	0	0	2.25e-08	0	0	0	0	0	0	0	0	0	0	0	0
s__uncultured_bacterium_esnapd161	0	0	0	0	0	0	4.58e-08	0	0	0	0	0	0	0	0
s__Citrobacter_sp_MGH105	1.97e-08	0	0	5.98e-08	2.29e-08	2.69e-08	0	0	0	0	2.41e-08	2.05e-08	0	2.44e-08	0
s__Jannaschia_sp_EhC01	6.09e-07	8.51e-08	2.93e-07	1.4e-07	7.57e-07	5.38e-08	5.27e-07	1.36e-07	2.77e-07	3.78e-07	2.65e-07	2.47e-07	6.06e-07	2.44e-07	2.9e-07
s__uncultured_marine_group_II/III_euryarchaeote_AD1000_65_H04	0	1.49e-07	4.5e-08	0	6.88e-08	0	0	0	0	0	7.23e-08	2.05e-08	0	0	0
s__Parcubacteria_group_bacterium_GW2011_GWE2_38_18	2.75e-07	1.7e-07	4.73e-07	3.79e-07	2.06e-07	2.42e-07	3.21e-07	1.36e-07	3.02e-07	2.27e-07	1.69e-07	2.88e-07	2.02e-07	1.71e-07	3.38e-07
s__Peniophora_sp_CONT	0	0	0	1.99e-08	2.29e-08	2.69e-08	4.58e-08	4.54e-08	0	1.76e-07	0	0	2.53e-08	2.44e-08	2.42e-08
s__Bradyrhizobium_stylosanthis	1.97e-08	2.13e-08	0	0	2.29e-08	0	9.16e-08	2.95e-07	5.04e-08	5.03e-08	0	2.05e-08	7.58e-08	7.33e-08	1.21e-07
s__Nipponia_nippon	1.18e-07	0	0	3.99e-08	0	0	0	4.54e-08	7.56e-08	2.52e-08	4.82e-08	0	0	4.89e-08	0
s__Streptococcus_entericus	2.38e-06	9.78e-07	2.18e-06	2.15e-06	1.93e-06	5.7e-06	2.77e-06	4.72e-06	5.29e-06	1.69e-06	3.35e-06	5.55e-06	1.67e-06	4.79e-06	2.78e-06
s__Streptomyces_xiaopingdaonensis	0	1.06e-07	2.25e-08	0	0	2.69e-08	4.58e-08	2.27e-08	7.56e-08	2.52e-08	0	0	2.53e-08	9.78e-08	0
s__Thermus_phage_phiYS40	0	4.25e-08	0	2.59e-07	9.17e-08	0	2.29e-08	0	5.04e-08	0	4.82e-08	0	0	7.33e-08	0
s__Beta_vulgaris	9.83e-08	0	0	0	0	0	0	0	0	0	0	0	0	0	0
s__uncultured_delta_proteobacterium_DeepAnt-1F12	0	2.13e-08	0	0	4.59e-08	0	0	0	0	0	0	0	0	0	0
s__Bifidobacterium_biavatii	5.74e-06	4.68e-06	4.5e-06	9.69e-06	7.38e-06	2.49e-05	6.34e-06	1.86e-05	1.7e-05	1.38e-05	1.98e-05	2.35e-05	1.01e-05	1.87e-05	1.45e-05
s__Streptomyces_rishiriensis	0	0	0	0	0	2.69e-08	0	0	0	0	0	0	0	0	0
s__Bacteroides_sp_CAG875	0.000471467	0.000604047	0.000534481	0.000504699	0.000402897	0.00058695	0.00047785	0.00070435	0.000436209	0.000516897	0.000406053	0.000495894	0.000666006	0.000336378	0.000509109
s__Nitrospira_bacterium_SM23_35	2.75e-07	3.4e-07	2.48e-07	8.98e-07	2.75e-07	2.42e-07	2.06e-07	3.18e-07	2.27e-07	5.03e-07	2.89e-07	1.23e-07	5.56e-07	4.64e-07	3.87e-07
s__Gordonia_rubripertincta	0	2.13e-08	1.13e-07	3.99e-08	0	0	0	0	0	2.52e-08	0	4.11e-08	1.26e-07	7.33e-08	2.42e-08
s__Alistipes_sp_CAG29	9.99e-05	0.000138969	0.000129461	8.62e-05	9.02e-05	0.000116283	0.000119073	8.69e-05	7.11e-05	0.000111972	8.4e-05	7.1e-05	0.000119273	6.92e-05	8.2e-05
s__Erysipelotrichaceae_bacterium_CAG64	3.27e-05	1.12e-05	2.1e-05	2.18e-05	1.76e-05	0.000147974	5.72e-06	0.000168478	0.000181544	5.25e-05	6.08e-05	9.74e-05	1.69e-05	8.72e-05	7.54e-05
s__Halonotius_sp_J07HN4	2.36e-07	0	0	3.99e-08	6.88e-08	0	4.58e-08	0	0	0	2.41e-08	0	2.53e-08	7.33e-08	0
s__Halomonas_alkaliantarctica	2.42e-06	1.08e-06	2.41e-06	1.22e-06	3.16e-06	6.18e-07	2.59e-06	3.63e-07	1.36e-06	1.64e-06	1.23e-06	6.98e-07	7.08e-07	9.04e-07	5.32e-07
s__Schistosoma_japonicum	3.93e-08	0	2.25e-08	0	0	5.38e-08	6.87e-08	2.27e-08	2.52e-08	1.51e-07	2.41e-08	4.11e-08	0	0	0
s__Rhizobium_leguminosarum	9.44e-06	1.03e-05	9.3e-06	1.36e-05	1.26e-05	8.33e-06	9.71e-06	9.3e-06	8.14e-06	1.01e-05	8.17e-06	6.82e-06	1.2e-05	1.01e-05	1.04e-05
s__Alteromonas_stellipolaris	9.63e-07	2.21e-06	1.8e-07	1.3e-06	2.98e-07	1.16e-06	2.52e-07	1.2e-06	8.31e-07	2.37e-06	1.66e-06	2.05e-07	2.86e-06	9.53e-07	9.91e-07
s__Draconibacterium_orientale	0.00018055	0.000208389	0.000199392	0.000191257	0.00015882	0.000223829	0.000188731	0.00019159	0.000167711	0.000212895	0.000171561	0.000182904	0.00026619	0.000136986	0.000187411
s__Reithrodontomys_fulvescens	0	0	0	0	0	0	0	0	0	2.52e-08	0	0	0	0	2.42e-08
s__Prevotella_dentalis	0.000296638	0.000396509	0.000345694	0.000234817	0.000284665	0.000306512	0.000269976	0.000282906	0.000261191	0.000361486	0.000213668	0.000284803	0.000223333	0.000172283	0.00017929
s__Clostridium_saccharobutylicum	1.45e-05	1.14e-05	1e-05	2.45e-05	1.64e-05	1.39e-05	1.2e-05	1.72e-05	1.66e-05	1.16e-05	1.94e-05	1.33e-05	1.22e-05	2.26e-05	2.1e-05
s__Nereida_ignava	1.57e-07	1.06e-07	6.75e-08	1.4e-07	1.15e-07	2.69e-07	1.14e-07	2.95e-07	5.04e-08	1.76e-07	9.64e-08	6.16e-08	2.78e-07	2.69e-07	4.83e-08
s__Vibrio_maritimus	1.63e-06	8.93e-07	1.26e-06	1.24e-06	1.05e-06	2.5e-06	2.04e-06	4.83e-06	3.6e-06	1.69e-06	1.95e-06	3.55e-06	2.48e-06	1.71e-06	4.59e-06
s__Stenotrophomonas_sp_DDT-1	0	0	0	3.99e-08	0	0	0	0	0	0	0	0	0	2.44e-08	0
s__Lachnospiraceae_bacterium_ND2006	3.54e-05	3e-05	1.53e-05	8.49e-05	3.56e-05	4.09e-05	4.09e-05	6.22e-05	6.17e-05	2.53e-05	7.77e-05	5.9e-05	5.14e-05	7.86e-05	8.67e-05
s__Prevotella_sp_CAG592	0.000485799	0.000601325	0.000609996	0.000384428	0.000503449	0.000464727	0.000493215	0.000472773	0.000401614	0.000549137	0.000368671	0.00044704	0.000417808	0.00030746	0.000402617
s__Staphylococcus_cohnii	3.11e-05	6.59e-07	0.000269684	1.3e-05	3.41e-05	6.18e-07	8.45e-06	1.09e-06	1.56e-06	2.54e-06	1.98e-06	5.55e-07	4.55e-07	6.51e-05	4.79e-06
s__Lespedeza_capitata	0	0	0	0	0	0	0	0	0	0	0	0	0	0	0
s__Klebsiella_quasipneumoniae_subsp_quasipneumoniae	3.93e-08	2.13e-08	0	1.99e-08	0	1.08e-07	0	1.36e-07	1.51e-07	1.01e-07	2.41e-07	1.03e-07	0	4.89e-08	7.25e-08
s__candidate_division_WWE3_bacterium_GW2011_GWB1_44_4	2.65e-06	2.19e-06	1.58e-06	1.34e-06	2.06e-06	8.6e-07	1.19e-06	7.71e-07	8.31e-07	1.71e-06	7.47e-07	1.44e-07	7.83e-07	6.6e-07	4.11e-07
s__Hamiltonella_virus_APSE1	0	4.25e-08	0	0	0	0	0	0	0	0	0	0	2.53e-08	0	0
s__Cupriavidus_sp_BIS7	3.93e-08	1.7e-07	6.75e-08	2.19e-07	6.88e-08	2.42e-07	4.58e-08	4.54e-08	5.04e-08	7.55e-08	1.45e-07	2.26e-07	1.01e-07	2.2e-07	1.45e-07
s__Streptococcus_marimammalium	1.32e-06	4.25e-07	1.78e-06	1.74e-06	7.11e-07	3.12e-06	2.84e-06	2.4e-06	2.27e-06	1.91e-06	2.29e-06	1.97e-06	7.08e-07	2.03e-06	2.25e-06
s__Achromobacter_sp_Root83	1.97e-07	1.06e-07	1.35e-07	2.39e-07	2.98e-07	1.61e-07	1.37e-07	0	1.76e-07	1.76e-07	7.23e-08	4.11e-08	2.53e-08	1.71e-07	1.21e-07
s__uncultured_delta_proteobacterium	5.9e-08	2.13e-08	6.75e-08	1.99e-08	0	5.38e-08	4.58e-08	2.27e-08	0	2.52e-08	0	4.11e-08	5.05e-08	2.44e-08	2.42e-08
s__Atopobium_sp_BV3Ac4	5.11e-07	1.06e-07	3.83e-07	8.98e-07	1.83e-07	4.84e-07	5.27e-07	2.99e-06	6.3e-07	1.51e-07	3.13e-07	2.67e-07	1.39e-06	4.35e-06	5.32e-07
s__Herbaspirillum_rhizosphaerae	1.04e-06	2.76e-06	1.51e-06	2.09e-06	3.21e-07	2.58e-06	5.5e-07	1.11e-06	7.56e-07	1.41e-06	1.81e-06	1.23e-06	3.46e-06	1.39e-06	1.98e-06
s__Actinoplanes_garbadinensis	0	0	0	0	0	0	0	0	2.52e-08	0	0	0	0	0	0
s__uncultured_Deinococcus_sp	0	0	0	0	0	0	0	3.4e-07	0	0	4.82e-08	4.11e-08	0	0	0
s__Aeromonas_hydrophila_subsp_hydrophila	0	1.28e-07	0	0	2.29e-08	0	0	0	0	0	0	2.05e-08	0	0	0
s__Bifidobacterium_thermophilum	4.86e-06	1.94e-06	4.17e-06	4.89e-06	4.08e-06	1.65e-05	3.41e-06	1.75e-05	1.12e-05	7.65e-06	1.48e-05	1.73e-05	4.65e-06	1.11e-05	6.91e-06
s__Bacillaceae_bacterium_MTCC_10057	3.93e-07	1.91e-07	2.03e-07	6.78e-07	2.75e-07	2.69e-07	4.12e-07	1.36e-07	2.77e-07	2.77e-07	1.59e-06	3.29e-07	3.03e-07	5.38e-07	5.08e-07
s__Clostridium_bolteae	0.000224823	0.00022585	0.000140628	0.000687	0.0003588	0.000146845	0.000330039	0.000163624	0.000373494	0.000138926	0.000628832	0.000276647	0.000245242	0.000960123	0.000494824
s__Enterobacter_sp_DC4	0	0	0	0	0	0	0	0	0	0	0	0	0	0	0
s__Aeromonas_australiensis	2.16e-07	3.62e-07	2.25e-08	1.8e-07	3.67e-07	2.15e-07	1.37e-07	1.36e-07	1.26e-07	1.01e-07	4.82e-08	6.16e-08	2.02e-07	1.71e-07	0
s__Cyberlindnera_jadinii	3.93e-08	0	9.01e-08	1.99e-07	1.38e-07	2.69e-08	9.16e-08	0	1.26e-07	1.26e-07	0	2.05e-08	1.01e-07	1.96e-07	1.21e-07
s__Actinomadura_madurae	6.88e-07	6.81e-07	5.85e-07	4.39e-07	1.31e-06	2.42e-07	4.12e-07	6.8e-07	3.78e-07	5.29e-07	5.06e-07	2.88e-07	1.77e-07	4.16e-07	1.69e-07
s__Candidatus_Collierbacteria_bacterium_GW2011_GWE2_42_48	0	0	2.25e-08	0	0	0	0	0	0	0	0	0	0	0	0
s__Methylosinus_sp_PW1	9.24e-07	3.4e-07	5.85e-07	3.59e-07	6.88e-08	3.49e-07	2.29e-08	3.18e-07	6.3e-07	1.01e-07	1.21e-07	3.29e-07	4.3e-07	3.18e-07	4.35e-07
s__Candidatus_Uhrbacteria_bacterium_GW2011_GWD2_52_7	1.45e-06	2.34e-07	6.75e-07	2.99e-07	9.17e-07	9.95e-07	1.65e-06	2.11e-06	1.59e-06	9.06e-07	6.75e-07	1.31e-06	9.86e-07	1.03e-06	1.47e-06
s__Halomonas_sp_HG01	3.93e-08	0	2.25e-08	7.98e-08	2.29e-08	0	0	6.8e-08	2.52e-08	0	0	6.16e-08	2.53e-08	4.89e-08	0
s__Desulfomicrobium_baculatum	6.23e-06	3.89e-06	6.26e-06	1.81e-05	1.09e-05	5.81e-06	8.84e-06	4.47e-06	7.89e-06	4.86e-06	6.05e-06	5.16e-06	4.25e-06	1.14e-05	6.21e-06
s__uncultured_marine_group_II/III_euryarchaeote_AD1000_117_B07	0	0	0	1.99e-08	0	0	0	0	0	0	0	0	0	2.44e-08	2.42e-08
s__Lasiopodomys_gregalis	0	0	0	1.99e-08	0	0	0	0	0	0	0	0	0	0	0
s__Parcubacteria_group_bacterium_GW2011_GWA2_47_8	9.83e-08	0	6.75e-08	1.99e-07	4.59e-08	1.08e-07	6.87e-08	4.54e-08	5.04e-08	0	2.41e-08	2.05e-07	2.53e-08	7.33e-08	2.42e-08
s__Bacteroides_barnesiae	0.00118205	0.00122945	0.00112545	0.000892817	0.000970506	0.00117484	0.00102217	0.00108322	0.00104222	0.0011729	0.000861179	0.00108871	0.00132302	0.000720495	0.00106535
s__Beijerinckia_mobilis	1.61e-06	3.42e-06	2.68e-06	3.39e-06	4.59e-07	3.49e-06	1.37e-06	2.68e-06	2.77e-06	2.97e-06	2.94e-06	2.34e-06	3.54e-06	2.15e-06	3.24e-06
s__Phelipanche_ramosa	1.97e-08	0	0	0	0	0	0	0	0	0	0	0	0	0	0
s__Neochlamydia_sp_TUME1	3.93e-08	0	4.5e-08	1.99e-08	9.17e-08	2.69e-08	1.83e-07	0	0	1.51e-07	9.64e-08	2.05e-08	0	7.33e-08	0
s__Microgenomates_group_bacterium_GW2011_GWA2_37_6	5.9e-08	2.13e-08	4.5e-08	0	0	2.69e-08	2.29e-08	0	2.52e-08	7.55e-08	2.41e-08	6.16e-08	2.53e-08	0	2.42e-08
s__Rathayibacter_sp_Leaf296	1.97e-07	1.7e-07	2.48e-07	1.99e-07	2.98e-07	3.23e-07	2.98e-07	2.72e-07	3.28e-07	2.01e-07	9.64e-08	2.88e-07	5.05e-08	2.44e-07	1.93e-07
s__Solanum_bulbocastanum	0	0	0	0	0	0	0	0	0	0	0	0	0	0	0
s__Bacillus_thermoamylovorans	1.21e-05	1.09e-05	8.26e-06	1.38e-05	8.21e-06	1.08e-05	8.43e-06	1.08e-05	9.95e-06	6.12e-06	1.22e-05	1.19e-05	8.84e-06	1.47e-05	1.03e-05
s__Saccharomyces_kudriavzevii	0	0	0	0	0	0	0	0	0	0	2.41e-08	2.05e-08	0	0	0
s__Streptococcus_dentasini	2.6e-06	2.17e-06	4.95e-06	3.79e-06	5.82e-06	7.53e-06	4.01e-06	7.12e-06	7.28e-06	3.88e-06	5.23e-06	3.68e-06	1.77e-06	4.91e-06	4.16e-06
s__Aquabacterium_parvum	5.31e-07	4.68e-07	4.73e-07	2.39e-07	3.21e-07	1.64e-06	3.43e-07	6.8e-07	2.02e-06	9.31e-07	2.17e-07	1.91e-06	6.82e-07	4.64e-07	4.59e-07
s__Chlorobi_bacterium_OLB6	2.36e-06	7.87e-06	2.3e-06	4.53e-06	1.7e-06	2.82e-06	1.9e-06	1.97e-06	1.34e-06	2.44e-06	2.53e-06	1.23e-06	3.79e-06	2.35e-06	2.9e-06
s__Citrobacter_amalonaticus	1.79e-06	1.19e-06	1.24e-06	1.16e-06	1.47e-06	1.56e-06	1.35e-06	1.45e-06	2.14e-06	1.38e-06	1.47e-06	1.5e-06	2.6e-06	1.83e-06	1.04e-06
s__Nocardiopsis_dassonvillei	5.7e-07	4.89e-07	5.85e-07	4.99e-07	3.21e-07	2.69e-07	5.27e-07	4.08e-07	4.28e-07	4.78e-07	7.95e-07	2.26e-07	8.34e-07	1.1e-06	6.04e-07
s__Clostridium_sp_ATCC_29733	6.58e-05	5.59e-05	4.16e-05	9.67e-05	8.23e-05	0.00011725	6.71e-05	8.44e-05	0.000100208	4.88e-05	0.000134443	0.000105412	6.5e-05	0.000168714	0.000111784
s__Sphingomonas_sp_Leaf28	2.56e-07	4.68e-07	6.75e-08	3.19e-07	2.29e-08	4.3e-07	2.29e-08	2.72e-07	1.26e-07	5.29e-07	6.27e-07	2.26e-07	8.34e-07	3.91e-07	3.38e-07
s__uncultured_marine_thaumarchaeote_KM3_03_F11	0	0	0	0	0	0	0	2.27e-08	0	0	0	0	2.53e-08	2.44e-07	0
s__Streptomyces_sp_SA3_actG	0	2.13e-08	0	0	0	0	0	0	5.04e-08	2.52e-08	0	0	0	0	0
s__Intoshia_linei	0	6.38e-08	2.25e-08	1.99e-08	0	0	0	2.27e-08	2.52e-08	0	2.41e-08	8.22e-08	0	4.89e-08	0
s__Anaeromyces_mucronatus	0	0	0	0	0	0	0	0	0	0	0	0	0	4.89e-08	0
s__Flexithrix_dorotheae	2.97e-05	3.75e-05	3.59e-05	3.26e-05	2.68e-05	3.81e-05	3.27e-05	3.24e-05	2.46e-05	3.13e-05	2.69e-05	2.92e-05	3.92e-05	2.38e-05	3.06e-05
s__Kerstersia_gyiorum	2.56e-06	5.1e-07	6.75e-07	4.99e-07	1.24e-06	3.76e-07	3.89e-07	5.9e-07	7.31e-07	6.04e-07	3.37e-07	6.78e-07	4.55e-07	8.31e-07	5.08e-07
s__Leifsonia_sp_Leaf336	3.74e-07	2.34e-07	2.93e-07	2.19e-07	2.06e-07	1.61e-07	3.66e-07	1.36e-07	2.77e-07	1.01e-07	2.89e-07	3.08e-07	1.77e-07	1.96e-07	1.45e-07
s__Candidatus_Accumulibacter_sp_SK-11	4.13e-07	1.91e-07	3.38e-07	6.58e-07	5.27e-07	2.15e-07	5.95e-07	2.49e-07	6.3e-07	4.03e-07	3.86e-07	4.11e-07	3.03e-07	5.38e-07	7.25e-07
s__Candidatus_Xiphinematobacter_sp_Idaho_Grape	1.97e-08	1.91e-07	2.25e-08	5.98e-08	2.29e-08	0	1.6e-07	6.8e-08	0	2.52e-08	2.41e-08	8.22e-08	1.01e-07	1.47e-07	2.42e-08
s__Bartonella_clarridgeiae	1.97e-07	6.38e-08	4.5e-08	7.98e-08	1.15e-07	5.38e-08	1.14e-07	9.07e-08	7.56e-08	7.55e-08	7.23e-08	6.16e-08	2.53e-08	1.47e-07	1.45e-07
s__Paenibacillus_sp_Soil750	3.03e-06	2.81e-06	3.06e-06	8.36e-06	3.6e-06	1.77e-06	3.6e-06	2.02e-06	3.5e-06	1.94e-06	3.66e-06	3.06e-06	2.17e-06	5.72e-06	4.04e-06
s__Heligmosomoides_polygyrus	0	0	0	0	0	0	0	0	0	0	0	0	0	0	0
s__Flavobacteria_bacterium_MS024-2A	5.35e-06	7.1e-06	5.49e-06	5.25e-06	4.49e-06	5.03e-06	6.02e-06	3.02e-06	3.53e-06	6.64e-06	4.72e-06	4.46e-06	7.51e-06	3.32e-06	5.58e-06
s__Idiomarina_salinarum	5.31e-07	2.13e-07	4.28e-07	3.79e-07	5.96e-07	1.08e-07	2.98e-07	1.59e-07	4.28e-07	1.76e-07	2.17e-07	2.26e-07	3.03e-07	3.42e-07	1.69e-07
s__Clostridium_tertium	0	0	0	0	0	0	0	0	0	0	0	0	0	0	2.42e-08
s__Bos_indicus	0	0	0	0	0	0	0	0	0	0	0	0	0	0	2.42e-08
s__Mucispirillum_schaedleri	8.82e-05	7.27e-05	2.27e-05	0.00663074	0.000114884	1.19e-05	7.73e-05	5e-05	0.00118007	9.78e-05	0.0003934	8.69e-05	0.000578118	0.000888452	0.000831145
s__Neomegalonema_perideroedes	1.18e-07	1.06e-07	1.13e-07	2.19e-07	5.5e-07	3.49e-07	2.75e-07	3.63e-07	3.28e-07	1.26e-07	2.65e-07	2.05e-07	3.03e-07	4.16e-07	2.66e-07
s__Bacillus_virus_Megatron	1.97e-08	0	0	0	0	0	0	0	0	0	0	0	0	0	0
s__Mycoplasma_hyorhinis	5.31e-07	2.11e-06	1.13e-07	7.98e-08	7.11e-07	8.06e-08	1.14e-06	4.99e-07	1.01e-07	1.01e-06	1.45e-07	4.93e-07	2.53e-08	4.64e-07	4.83e-08
s__Beggiatoa_alba	3.91e-06	3.11e-06	2.12e-06	2.13e-06	2.96e-06	3.66e-06	3.39e-06	3.56e-06	3.05e-06	2.72e-06	2.99e-06	2.9e-06	3.66e-06	2.84e-06	3.7e-06
s__Acetobacter_cibinongensis	1.57e-07	6.38e-08	9.01e-08	4.79e-07	9.17e-08	1.34e-07	4.58e-07	1.13e-07	1.51e-07	1.01e-07	1.69e-07	1.85e-07	7.58e-08	2.2e-07	9.67e-08
s__uncultured_bacterium_Contig1588_n_1603_cl	1.38e-07	4.25e-08	1.35e-07	1.4e-07	4.59e-08	5.11e-07	2.29e-08	9.07e-07	9.07e-07	2.52e-08	3.13e-07	6.78e-07	4.04e-07	3.67e-07	9.91e-07
s__Haloarcula_marismortui	0	0	0	0	0	0	2.29e-08	0	0	0	4.82e-08	0	0	1.22e-07	2.42e-08
s__Beijerinckia_indica_subsp_indica	1.97e-08	0	2.25e-08	3.99e-08	9.17e-08	0	2.29e-08	0	2.52e-08	0	0	8.22e-08	2.53e-08	9.78e-08	4.83e-08
s__Halovivax_ruber	1.97e-08	0	4.5e-08	0	0	0	2.29e-08	4.54e-08	2.52e-08	0	0	8.22e-08	0	7.33e-08	2.42e-08
s__uncultured_verrucomicrobium_HF0500_18J03	0	1.17e-06	0	5.98e-07	0	0	0	1.93e-06	0	0	0	7.7e-06	3.29e-07	0	7.25e-08
s__uncultured_bacterium_Ele45G2	9.83e-08	0	9.01e-08	1.2e-07	6.88e-08	0	4.12e-07	0	2.52e-07	1.01e-07	2.65e-07	1.23e-07	1.01e-07	0	1.45e-07
s__Anaerococcus_sp_SB3	9.24e-07	6.17e-07	8.11e-07	7.98e-07	1.86e-06	4.57e-07	7.79e-07	1.16e-06	8.31e-07	8.05e-07	6.99e-07	1.01e-06	7.83e-07	1.2e-06	1.04e-06
s__Streptomyces_lavenduligriseus	2.95e-07	0	1.13e-07	9.97e-08	3.67e-07	5.38e-08	2.52e-07	2.27e-08	1.51e-07	2.52e-08	2.41e-08	2.05e-08	2.53e-08	2.2e-07	7.25e-08
s__Spiroplasma_citri	2.56e-07	2.34e-07	6.75e-08	1.2e-07	1.61e-07	2.42e-07	2.75e-07	1.36e-07	2.27e-07	2.01e-07	1.69e-07	2.26e-07	2.02e-07	2.93e-07	7.25e-08
s__Pasteurella_multocida_subsp_multocida	1.38e-06	9.15e-07	1.13e-06	1.52e-06	2.13e-06	2.18e-06	7.1e-07	2.56e-06	2.29e-06	1.11e-06	1.21e-06	2.16e-06	1.11e-06	1.22e-06	8.7e-07
s__Actinocyclus_sp_HK346	1.97e-08	0	0	0	0	0	0	0	0	0	0	0	0	0	0
s__Megasphaera_sp_BL7	1.04e-06	2.55e-06	8.33e-07	2.73e-06	6.65e-07	1.75e-06	8.01e-07	9.53e-07	1.34e-06	1.06e-06	1.57e-06	1.34e-06	2.05e-06	1.98e-06	2.13e-06
s__Daphnia_pulex	7.27e-07	6.81e-07	9.01e-07	6.78e-07	5.5e-07	4.3e-07	7.33e-07	1.41e-06	3.02e-07	3.78e-07	4.58e-07	4.31e-07	2.02e-07	2.2e-07	5.56e-07
s__Dickeya_dianthicola	2.56e-06	1.85e-06	2.57e-06	2.39e-06	1.28e-06	3.01e-06	1.63e-06	1.29e-06	1.21e-06	2.19e-06	2.46e-06	1.89e-06	3.29e-06	2.42e-06	2.8e-06
s__Aliagarivorans_taiwanensis	7.86e-08	4.25e-08	1.13e-07	7.98e-08	2.52e-07	2.69e-08	6.87e-08	2.27e-08	1.26e-07	1.26e-07	7.23e-08	4.11e-08	2.53e-08	0	9.67e-08
s__Dickeya_sp_NCPPB_3274	0	0	2.25e-08	1.99e-08	2.29e-08	0	0	0	0	0	0	0	2.53e-08	0	4.83e-08
s__Mycobacterium_kyorinense	1.18e-06	2.34e-07	7.88e-07	2.79e-07	1.15e-06	7.53e-07	1.05e-06	4.54e-07	8.31e-07	1.18e-06	6.99e-07	5.55e-07	5.31e-07	7.58e-07	6.77e-07
s__Trichococcus_sp_ES5	2.69e-06	2.3e-06	2.25e-06	5.23e-06	2.57e-06	2.61e-06	3.87e-06	2.36e-06	5.14e-06	2.16e-06	3.16e-06	4.73e-06	1.59e-06	6.48e-06	3.48e-06
s__Legionella_birminghamensis	1.93e-06	8.29e-07	1.8e-06	1.16e-06	1.58e-06	1.05e-06	1.72e-06	8.39e-07	1.66e-06	1.26e-06	1.01e-06	1.71e-06	1.36e-06	1.08e-06	9.67e-07
s__Agrobacterium_sp_ATCC_31749	1.57e-07	1.49e-07	4.73e-07	2.79e-07	2.29e-08	1.21e-06	6.87e-08	4.76e-07	8.82e-07	0	2.17e-07	1.15e-06	2.53e-08	9.04e-07	2.42e-08
s__Pseudanabaena_biceps	1.17e-05	2.31e-05	3.87e-06	1.51e-05	1.31e-06	1.91e-05	2.06e-06	1.18e-05	7.84e-06	2.4e-05	1.76e-05	1.79e-06	3.59e-05	1.01e-05	1.38e-05
s__Leuconostoc_mesenteroides	2.22e-06	2.53e-06	5.16e-06	2.53e-06	2.57e-06	5.46e-06	2.66e-06	5.51e-06	6.07e-06	3.05e-06	2.96e-06	3.39e-06	1.44e-06	4.5e-06	3.17e-06
s__Actinomyces_sp_oral_taxon_172	5.11e-07	1.91e-07	9.01e-08	6.98e-07	1.12e-06	8.6e-07	2.06e-07	1.16e-06	1.13e-06	2.27e-07	9.4e-07	1.52e-06	7.83e-07	2e-06	1.5e-06
s__Deltaproteobacteria_bacterium_CSP1-8	6.68e-07	2.98e-07	2.93e-07	1.3e-06	8.48e-07	3.49e-07	8.93e-07	1.36e-07	1.13e-06	1.01e-07	9.16e-07	3.29e-07	1.52e-07	7.09e-07	3.38e-07
s__Colobus_angolensis_palliatus	1.97e-08	0	0	5.98e-08	4.59e-08	1.61e-07	2.29e-08	1.81e-07	0	1.26e-07	1.21e-07	4.11e-08	0	0	1.45e-07
s__Deinococcus_marmoris	8.65e-07	5.74e-07	6.75e-07	3.39e-07	1.01e-06	4.84e-07	9.62e-07	4.08e-07	4.54e-07	7.8e-07	6.03e-07	2.88e-07	6.82e-07	2.69e-07	6.28e-07
s__Oceanobacillus_iheyensis	8.85e-07	5.96e-07	8.56e-07	1.32e-06	9.86e-07	8.87e-07	2.66e-06	1.68e-06	1.41e-06	6.29e-07	1.25e-06	7.81e-07	1.04e-06	2.18e-06	6.04e-07
s__Lactobacillus_versmoldensis	3.54e-07	7.23e-07	1.13e-06	1.91e-06	2.29e-07	5.38e-07	3.21e-07	4.76e-07	6.8e-07	5.29e-07	1.06e-06	5.96e-07	6.82e-07	9.53e-07	5.08e-07
s__Streptomyces_toyocaensis	3.93e-08	2.13e-08	2.25e-08	0	2.29e-08	2.69e-08	0	0	5.04e-08	0	4.82e-08	2.05e-08	0	9.78e-08	0
s__Thermaerobacter_subterraneus	3.38e-06	2.53e-06	2.45e-06	1.89e-06	2.13e-06	2.45e-06	3.16e-06	7.71e-07	3.45e-06	3.37e-06	2.36e-06	1.83e-06	1.59e-06	1.54e-06	1.91e-06
s__Sulfolobus_islandicus	5.9e-08	8.51e-08	2.25e-08	3.99e-08	2.29e-08	5.38e-08	6.87e-08	6.8e-08	2.52e-08	5.03e-08	7.23e-08	6.16e-08	5.05e-08	0	2.42e-08
s__Synergistales_bacterium_58_81	1.57e-07	8.51e-08	1.35e-07	5.98e-08	1.38e-07	1.08e-07	2.06e-07	1.36e-07	2.27e-07	2.01e-07	3.13e-07	1.03e-07	1.52e-07	7.33e-08	4.83e-08
s__Brachyspira_pilosicoli	9.89e-06	1.33e-05	9.59e-06	1.98e-05	1.06e-05	1.13e-05	7.95e-06	9.21e-06	9.02e-06	9.31e-06	1.4e-05	9.88e-06	1.38e-05	1.19e-05	1.27e-05
s__Mycobacterium_sp_ACS4331	3.93e-08	4.25e-08	1.58e-07	1.6e-07	4.59e-08	8.06e-08	6.87e-08	4.54e-08	5.04e-08	5.03e-08	1.21e-07	1.44e-07	0	2.93e-07	4.83e-08
s__Gordonia_namibiensis	3.93e-08	0	6.75e-08	3.99e-08	9.17e-08	0	9.16e-08	4.54e-08	0	1.76e-07	1.21e-07	2.67e-07	1.26e-07	4.89e-08	1.45e-07
s__Streptomyces_incarnatus	1.38e-07	6.81e-07	2.03e-07	5.39e-07	0	5.11e-07	1.14e-07	2.49e-07	1.26e-07	1.26e-07	3.86e-07	8.22e-08	5.56e-07	2.2e-07	1.69e-07
s__Bacteroides_thetaiotaomicron	0.00492951	0.00679291	0.00500369	0.00362731	0.00518845	0.00520898	0.00448299	0.00413633	0.00433949	0.0041546	0.00311714	0.00447824	0.00446853	0.00248232	0.00351878
s__Pseudooceanicola_atlanticus	3.93e-08	1.28e-07	2.25e-08	3.99e-08	6.88e-08	2.69e-08	1.6e-07	9.07e-08	1.26e-07	2.52e-08	0	1.64e-07	1.26e-07	9.78e-08	9.67e-08
s__Haloferax_sp_ATCC_BAA-646	0	0	0	0	0	0	0	2.27e-08	0	0	0	0	0	0	0
s__Serratia_sp_Leaf50	8.26e-07	6.17e-07	6.75e-07	6.38e-07	6.42e-07	1.45e-06	1.26e-06	9.98e-07	1.18e-06	9.31e-07	6.51e-07	6.78e-07	6.57e-07	1e-06	6.28e-07
s__Mitosporidium_daphniae	3.93e-08	0	2.25e-08	0	4.59e-08	0	0	0	2.52e-08	2.52e-08	2.41e-08	0	2.53e-08	0	0
s__Bacillus_sp_EGD-AK10	2.16e-07	1.7e-07	1.58e-07	1.4e-07	2.06e-07	5.38e-08	1.14e-07	0	1.01e-07	1.01e-07	9.64e-08	1.44e-07	1.01e-07	5.38e-07	4.59e-07
s__Methyloversatilis_thermotolerans	2.26e-06	2.36e-06	1.8e-06	2.77e-06	5.5e-07	2.55e-06	1.31e-06	1.66e-06	1.66e-06	2.52e-06	1.9e-06	2.3e-06	3.13e-06	1.61e-06	1.23e-06
s__Arsenophonus_endosymbiont_of_Nilaparvata_lugens	3.34e-07	2.13e-07	1.8e-07	3.19e-07	2.52e-07	2.96e-07	6.87e-08	1.59e-07	2.52e-07	5.03e-08	9.64e-08	4.31e-07	2.53e-08	7.33e-08	9.67e-08
s__uncultured_Oenococcus_sp	3.93e-08	0	0	0	4.59e-08	0	2.29e-08	0	0	0	9.64e-08	0	2.53e-08	0	4.83e-08
s__Bacillus_sp_UNC437CL72CviS29	5.5e-07	1.7e-07	3.15e-07	8.38e-07	3.67e-07	1.26e-06	1.14e-07	1.34e-06	1.13e-06	6.04e-07	6.03e-07	7.6e-07	3.79e-07	1.22e-06	8.46e-07
s__Streptomyces_pluripotens	9.83e-08	4.25e-08	9.01e-08	1.6e-07	4.59e-08	2.69e-08	2.06e-07	2.27e-08	0	2.52e-08	0	6.16e-08	5.05e-08	4.89e-08	7.25e-08
s__Thermoactinomyces_sp_CDF	4.33e-07	2.76e-07	3.15e-07	3.79e-07	3.67e-07	2.96e-07	8.24e-07	5.22e-07	5.04e-07	2.52e-07	7.47e-07	2.47e-07	4.8e-07	7.09e-07	3.87e-07
s__Candidatus_Saccharibacteria_bacterium_GW2011_GWA2_46_10	1.89e-05	1.28e-07	2e-05	5.8e-06	1.38e-05	7.85e-06	4.53e-05	4.49e-06	1.13e-05	1.22e-05	5.33e-06	9.04e-06	6.37e-06	1.23e-05	2.73e-06
s__Pseudoalteromonas_arabiensis	3.93e-07	1.7e-07	2.93e-07	5.98e-07	2.98e-07	1.4e-06	1.37e-07	1.93e-06	1.59e-06	8.56e-07	8.19e-07	1.09e-06	4.04e-07	9.53e-07	1.14e-06
s__Dolosigranulum_pigrum	2.42e-06	8.93e-07	1.78e-06	2.13e-06	2.71e-06	1.32e-06	1.35e-06	1.18e-06	2.12e-06	8.31e-07	8.19e-07	8.22e-07	1.11e-06	2.3e-06	6.28e-07
s__Clostridium_sp_CAG571	0.000394187	2.04e-05	0.000220286	0.000409539	3.57e-05	0.000238237	0.000236429	0.000193745	0.000184315	0.000142676	0.000424709	0.000567366	0.000122128	8.38e-05	6.63e-05
s__Eremothecium_sinecaudum	1.97e-08	0	1.58e-07	0	6.88e-08	0	0	0	2.52e-08	2.52e-08	0	4.11e-08	7.58e-08	7.33e-08	0
s__Helicobacter_trogontum	2.71e-06	7e-06	4.46e-06	8e-06	5.48e-06	8.9e-06	3.25e-06	7.69e-06	1.2e-05	9.04e-06	1.29e-05	7.85e-06	9.43e-06	2.5e-05	1.59e-05
s__Furcula_cinerea	0	0	0	0	0	0	0	0	0	0	0	0	0	2.44e-08	0
s__Enterococcus_phage_EFRM31	0	0	0	0	0	0	0	0	0	2.52e-08	0	0	0	0	0
s__Pochonia_chlamydosporia	1.97e-08	2.13e-08	9.01e-08	3.99e-08	0	0	4.58e-08	6.8e-08	7.56e-08	0	1.69e-07	8.22e-08	7.58e-08	7.33e-08	2.42e-08
s__Staphylococcus_lugdunensis	1.04e-06	3.19e-07	2e-06	6.18e-07	1.05e-06	4.84e-07	1.35e-06	5.22e-07	5.54e-07	2.77e-07	5.54e-07	3.08e-07	3.79e-07	9.04e-07	6.77e-07
s__Stylonychia_lemnae	3.93e-07	3.83e-07	2.48e-07	1.4e-07	9.17e-08	3.49e-07	2.29e-07	2.49e-07	2.27e-07	3.52e-07	5.06e-07	1.23e-07	3.79e-07	1.47e-07	2.66e-07
s__uncultured_archaeon_GZfos37B2	0	0	0	0	0	0	0	0	0	5.03e-08	0	0	0	0	0
s__Aureimonas_sp_Leaf324	7.47e-07	2.98e-07	4.05e-07	7.38e-07	5.04e-07	5.91e-07	1.83e-07	1.27e-06	8.06e-07	5.54e-07	8.19e-07	5.75e-07	8.34e-07	8.56e-07	1.69e-06
s__Mycobacterium_sp_155	2.16e-07	2.34e-07	2.48e-07	4.39e-07	9.17e-08	4.84e-07	2.06e-07	8.17e-07	4.79e-07	3.27e-07	6.03e-07	5.55e-07	3.29e-07	3.91e-07	9.43e-07
s__Streptomyces_sp_NRRL_S-813	1.77e-07	4.25e-08	4.5e-08	2.39e-07	6.88e-08	4.57e-07	1.14e-07	4.54e-07	2.52e-07	3.27e-07	1.93e-07	2.26e-07	1.77e-07	1.47e-07	2.42e-07
s__Mastigamoeba_balamuthi	9.83e-07	4.04e-07	5.63e-07	7.78e-07	1.49e-06	8.06e-08	6.18e-07	1.81e-07	2.27e-07	4.53e-07	4.1e-07	2.67e-07	2.27e-07	7.82e-07	1.69e-07
s__Novosphingobium_sp_AAP93	3.34e-07	1.91e-07	4.5e-08	1.8e-07	2.98e-07	4.84e-07	9.16e-08	9.53e-07	7.81e-07	1.26e-07	6.51e-07	1.05e-06	5.81e-07	5.38e-07	1.21e-06
s__Agropyron_mongolicum	3.34e-07	0	0	0	0	0	0	6.8e-08	0	0	1.93e-07	0	5.05e-08	4.89e-08	0
s__Parcubacteria_group_bacterium_GW2011_GWA2_39_18	4.91e-07	0	5.85e-07	2.79e-07	3.44e-07	2.69e-07	1.31e-06	1.36e-07	6.3e-07	2.01e-07	1.45e-07	5.55e-07	1.77e-07	2.93e-07	4.83e-08
s__Paraburkholderia_ginsengiterrae	0	2.13e-08	0	0	0	0	0	0	0	0	0	0	0	0	0
s__Nigerium_massiliense	4.13e-07	4.47e-07	3.83e-07	3.79e-07	3.21e-07	3.49e-07	4.81e-07	6.35e-07	7.31e-07	5.29e-07	4.58e-07	8.63e-07	4.3e-07	4.16e-07	2.18e-07
s__Legionella_santicrucis	5.9e-08	6.38e-08	1.35e-07	1.99e-08	0	8.06e-08	1.6e-06	2.27e-08	1.01e-07	1.01e-07	1.21e-07	3.08e-07	1.01e-07	1.34e-06	1.45e-07
s__Sutterella_sp_CAG521	1.68e-05	2.49e-05	1.08e-05	1.12e-05	1.11e-05	3.41e-05	6.8e-06	1.35e-05	2.59e-05	2.95e-05	1.07e-05	2.83e-05	2.49e-05	1.65e-05	2.26e-05
s__Streptomyces_sp_NRRL_WC-3549	1.97e-08	4.25e-08	4.5e-08	1.99e-08	9.17e-08	0	6.87e-08	6.8e-08	5.04e-08	1.01e-07	0	4.11e-08	0	9.78e-08	0
s__Synechococcus_phage_S-CAM8	2.16e-07	6.38e-08	2.25e-08	0	4.59e-08	0	0	0	0	0	0	4.11e-08	7.58e-08	0	0
s__Desulfatiglans_anilini	3.62e-06	3.36e-06	3.31e-06	4.11e-06	3.85e-06	2.98e-06	5.29e-06	2.2e-06	3.96e-06	3.93e-06	2.99e-06	2.65e-06	3.18e-06	3.52e-06	3.17e-06
s__Campylobacter_sp_FOBRC14	2.16e-07	0	2.25e-07	5.98e-07	1.83e-07	1.34e-07	2.75e-07	1.36e-07	2.27e-07	3.52e-07	2.65e-07	1.44e-07	1.77e-07	1.47e-07	2.42e-07
s__Enterobacter_cloacae_subsp_dissolvens	1.97e-08	0	4.5e-08	5.98e-08	0	2.69e-08	2.29e-08	6.8e-08	2.52e-08	0	1.45e-07	0	0	0	0
s__Aureimonas_sp_Leaf460	3.93e-08	4.25e-08	4.5e-08	0	1.38e-07	2.69e-08	0	0	0	0	4.82e-08	0	0	2.44e-08	0
s__Acinetobacter_bereziniae	2.61e-06	4.55e-06	2.97e-06	3.15e-06	2.96e-06	3.44e-06	4.3e-06	1.86e-06	2.17e-06	3.9e-06	3.21e-06	3.23e-06	2.8e-06	1.91e-06	2.1e-06
s__Pratylenchus_goodeyi	0	0	0	0	0	0	0	0	0	0	0	2.05e-08	0	0	0
s__Hoyosella_altamirensis	1.18e-07	8.51e-08	2.25e-08	5.98e-08	6.88e-08	1.08e-07	2.75e-07	2.27e-08	2.27e-07	7.55e-08	1.21e-07	8.22e-08	1.77e-07	3.18e-07	2.42e-08
s__Roseovarius_indicus	1.38e-07	8.51e-08	9.01e-08	3.39e-07	2.06e-07	2.96e-07	1.83e-07	2.27e-07	1.51e-07	1.26e-07	1.45e-07	1.23e-07	1.26e-07	2.69e-07	2.42e-07
s__Roseburia_sp_A2-183	1.97e-08	0	0	3.99e-08	4.59e-08	0	4.58e-08	9.07e-08	2.52e-08	0	0	2.05e-08	0	7.33e-08	4.83e-08
s__Lactobacillus_farraginis	6.29e-07	5.96e-07	3.78e-06	5.58e-07	1.47e-06	1.1e-06	1.47e-06	9.07e-07	6.55e-07	7.05e-07	1.08e-06	4.52e-07	3.79e-07	7.82e-07	5.32e-07
s__candidate_divison_MSBL1_archaeon_SCGC-AAA261O19	0	0	0	3.99e-08	0	0	2.29e-08	0	0	0	0	0	0	0	0
s__Frankia_discariae	9.44e-07	5.96e-07	1.17e-06	4.99e-07	7.11e-07	9.14e-07	8.47e-07	2.04e-07	7.31e-07	1.23e-06	1.28e-06	6.37e-07	4.55e-07	1.08e-06	9.91e-07
s__Achromobacter_sp_DH1f	1.97e-07	1.49e-07	6.75e-08	1.99e-08	1.15e-07	5.38e-08	4.58e-08	2.27e-08	1.01e-07	7.55e-08	0	8.22e-08	2.02e-07	1.22e-07	9.67e-08
s__Afifella_pfennigii	5.11e-07	4.68e-07	6.08e-07	4.19e-07	7.8e-07	1.13e-06	1.1e-06	6.12e-07	1.41e-06	5.54e-07	4.82e-07	1.25e-06	6.82e-07	1e-06	6.28e-07
s__Parcubacteria_group_bacterium_GW2011_GWB1_45_7	1.97e-08	0	6.75e-08	5.98e-08	2.29e-08	2.69e-08	2.29e-07	2.27e-08	1.51e-07	0	2.41e-08	2.05e-08	0	4.89e-08	0
s__Mycobacterium_virus_SG4	0	0	0	0	0	2.69e-08	0	0	0	0	0	0	0	0	0
s__Blastomyces_parvus	0	2.13e-08	0	0	0	0	0	0	0	0	0	0	0	0	0
s__Aureimonas_sp_D3	1.2e-06	2.76e-07	5.85e-07	8.78e-07	1.65e-06	9.41e-07	1.33e-06	1.7e-06	1.64e-06	1.21e-06	8.68e-07	1.4e-06	1.44e-06	6.6e-07	1.96e-06
s__Desulfosarcina_sp_BuS5	2.2e-06	3.13e-06	1.76e-06	4.27e-06	2.98e-06	2.31e-06	2.36e-06	1.97e-06	1.71e-06	2.97e-06	2.43e-06	1.62e-06	3.11e-06	2.86e-06	1.93e-06
s__Sphingobacterium_mizutaii	0	0	0	0	9.17e-08	0	0	0	0	0	0	0	0	0	0
s__Mesorhizobium_japonicum	1.97e-08	0	0	1.99e-08	0	0	9.16e-08	0	0	0	7.23e-08	2.05e-08	0	4.89e-08	4.83e-08
s__Kurthia_sibirica	0	0	0	0	0	0	0	0	0	0	2.41e-08	0	0	0	0
s__Spiroplasma_litorale	3.93e-08	6.38e-08	9.01e-08	2.39e-07	6.88e-08	1.61e-07	1.14e-07	2.95e-07	1.51e-07	5.03e-08	2.41e-08	0	2.53e-08	9.78e-08	7.25e-08
s__Lactobacillus_hominis	1.32e-05	1.21e-05	4.09e-05	1.46e-05	3.7e-05	5.66e-05	4.83e-05	1.06e-05	1.06e-05	6.05e-05	3.92e-05	3.19e-05	1.66e-05	4.87e-05	3.6e-05
s__Penicillium_roqueforti	0	8.51e-08	0	1.99e-08	0	0	0	2.27e-08	2.52e-08	0	2.41e-08	0	0	4.89e-08	2.42e-08
s__Acinetobacter_phage_phiAC-1	0	0	0	1.99e-07	0	0	0	0	7.56e-08	0	0	0	2.53e-08	4.89e-08	0
s__Hydrogenophaga_crassostreae	6.49e-07	7.66e-07	2.03e-07	3.39e-07	2.75e-07	6.45e-07	5.04e-07	9.07e-08	4.54e-07	5.03e-07	2.41e-07	7.4e-07	5.05e-07	4.89e-07	4.35e-07
s__Streptomyces_sp_NRRL_WC-3641	0	0	0	0	0	0	0	0	0	0	0	2.05e-08	0	0	0
s__Lactobacillus_plantarum_subsp_argentoratensis	2.56e-07	1.06e-07	1.6e-06	1.6e-07	7.8e-07	1.08e-07	7.56e-07	3.63e-07	4.54e-07	4.03e-07	2.89e-07	2.88e-07	1.26e-07	4.64e-07	3.38e-07
s__Moraxella_boevrei	2.44e-06	4.68e-07	6.3e-07	7.78e-07	9.86e-07	8.6e-07	1.53e-06	2.63e-06	1.64e-06	1.16e-06	9.16e-07	1.73e-06	2e-06	9.04e-07	1.14e-06
s__Dokdonia_sp_PRO95	4.7e-06	7.12e-06	4.39e-06	5.6e-06	2.18e-06	5.78e-06	3.76e-06	5.33e-06	3.15e-06	6.54e-06	5.37e-06	3.97e-06	8.54e-06	3.74e-06	6.14e-06
s__Prevotella_disiens	0.000718288	0.000702287	0.000740313	0.000514093	0.000729984	0.000588778	0.000573498	0.000643496	0.000578395	0.000789666	0.000502077	0.000524758	0.000609453	0.000412595	0.000517278
s__Streptomyces_sp_TP-A0356	0	0	2.25e-08	1.6e-07	0	2.69e-08	1.83e-07	0	2.52e-08	2.52e-08	9.64e-08	1.23e-07	0	1.47e-07	2.42e-08
s__Enterobacteriaceae_bacterium_bta3-1	3.93e-08	2.13e-08	1.35e-07	0	2.29e-08	6.18e-07	6.87e-08	3.18e-07	5.8e-07	5.03e-08	7.23e-08	3.7e-07	1.01e-07	3.91e-07	4.83e-08
s__Clostridium_sp_C105KSO14	0.000131795	7.91e-05	7.37e-05	0.000252788	0.00018292	4.48e-05	0.000191868	5.35e-05	0.000177235	6.8e-05	0.00032425	0.000107487	8.92e-05	0.000482652	0.000199327
s__Olsenella_uli	2.39e-05	8.64e-06	8.87e-06	4.28e-05	1.16e-05	1.87e-05	1.23e-05	0.000299622	2.02e-05	9.89e-06	2.28e-05	3.27e-05	0.000135951	0.000397464	3e-05
s__Hydrogenobaculum_sp_SHO	0	0	0	0	2.29e-08	0	0	0	0	0	0	0	0	2.44e-08	0
s__Glaciecola_sp_HTCC2999	1.38e-07	1.91e-07	2.7e-07	3.39e-07	3.21e-07	1.61e-07	1.14e-07	9.07e-08	2.02e-07	2.52e-07	1.45e-07	1.03e-07	2.53e-07	1.47e-07	2.18e-07
s__Paenibacillus_sp_FSL_R5-0345	1.26e-06	8.29e-07	1.15e-06	2.63e-06	1.38e-06	9.41e-07	1.65e-06	1.47e-06	2.57e-06	8.56e-07	2.02e-06	1.56e-06	8.09e-07	2.88e-06	1.79e-06
s__Protobothrops_flavoviridis	0	0	0	0	0	0	0	0	0	0	0	0	0	4.89e-08	0
s__Omnitrophica_WOR_2_bacterium_SM23_72	1.1e-06	5.96e-07	4.73e-07	8.78e-07	5.27e-07	1.13e-06	1.81e-06	1.34e-06	9.32e-07	6.54e-07	6.03e-07	1.01e-06	1.14e-06	1.37e-06	1.47e-06
s__Pseudomonas_sp_QTF5	0	0	2.25e-08	0	0	0	2.29e-08	2.27e-08	2.52e-08	2.52e-08	2.41e-08	0	0	2.44e-08	0
s__Moelleriella_libera	1.18e-07	0	9.01e-08	1.99e-08	6.88e-08	2.69e-08	2.29e-08	6.8e-08	1.01e-07	1.01e-07	0	4.11e-08	1.01e-07	3.42e-07	4.83e-08
s__Candidatus_Curtissbacteria_bacterium_GW2011_GWB1_40_28	1.97e-08	2.13e-08	4.5e-08	7.98e-08	2.29e-08	2.69e-08	2.29e-08	0	0	0	1.21e-07	3.08e-07	7.58e-08	9.78e-08	4.83e-08
s__Clostridium_hiranonis	1.64e-05	1.45e-05	1.11e-05	2.35e-05	9.59e-06	2.8e-05	1.27e-05	2.85e-05	2.61e-05	1.42e-05	2.63e-05	2.08e-05	2.06e-05	2.79e-05	2.41e-05
s__Pseudomonas_avellanae	5.9e-08	2.13e-08	4.5e-08	1.99e-08	2.75e-07	2.69e-08	4.58e-08	0	1.01e-07	4.28e-07	1.45e-07	4.11e-08	2.02e-07	9.78e-08	2.42e-08
s__Neptunomonas_japonica	1.45e-06	2.87e-06	1.78e-06	2.39e-06	2.75e-07	2.12e-06	1.31e-06	1.29e-06	6.3e-07	1.71e-06	1.83e-06	9.86e-07	3.31e-06	1.47e-06	2.34e-06
s__Bacillus_phage_SageFayge	0	0	0	0	0	0	0	0	0	0	0	0	0	0	0
s__Drosophila_sechellia	0	0	0	0	2.29e-08	0	0	0	0	0	0	0	0	0	0
s__Candidatus_Woesebacteria_bacterium_GW2011_GWC1_43_10b	2.56e-07	4.25e-08	3.15e-07	7.98e-08	2.06e-07	2.69e-08	9.16e-08	9.07e-08	1.01e-07	1.01e-07	9.64e-08	1.23e-07	7.58e-08	1.71e-07	4.83e-08
s__Nostoc_sp_152	3.93e-08	0	0	9.97e-08	0	0	0	0	0	2.52e-08	0	0	0	0	0
s__uncultured_bacterium_Contig140	1.51e-06	9.15e-07	8.56e-07	8.26e-06	1.61e-06	6.18e-07	2.54e-06	1.13e-06	3.12e-06	8.81e-07	1.05e-05	4.6e-06	1.26e-06	4.13e-06	8.99e-06
s__Pseudomonas_denitrificans_nomen_rejiciendum	3.54e-06	6.72e-06	4.12e-06	5.68e-06	4.38e-06	5.43e-06	3.87e-06	2.95e-06	1.89e-06	5.51e-06	4.75e-06	2.57e-06	8.39e-06	3.25e-06	5.17e-06
s__Pseudomonas_sp_NBRC_111135	0	0	2.25e-08	0	0	0	0	0	0	0	0	0	2.53e-08	0	0
s__Caldicellulosiruptor_hydrothermalis	1.55e-06	1.45e-06	8.56e-07	3.37e-06	1.56e-06	1.51e-06	1.56e-06	1.79e-06	1.79e-06	1.18e-06	1.98e-06	1.85e-06	2.2e-06	2.84e-06	2.15e-06
s__Bacillus_virus_Blastoid	0	0	0	0	0	0	2.29e-08	0	0	0	0	0	0	0	0
s__Rhizobium_mongolense	3.93e-08	8.51e-08	2.25e-08	9.97e-08	2.06e-07	1.08e-07	2.29e-08	1.13e-07	0	0	2.41e-07	2.05e-08	1.26e-07	4.89e-08	9.67e-08
s__Bacillus_glycinifermentans	9.83e-07	5.96e-07	1.37e-06	2.39e-06	1.28e-06	2.66e-06	1.03e-06	2.47e-06	2.22e-06	1.21e-06	2.41e-06	1.66e-06	1.04e-06	2.27e-06	1.6e-06
s__Candidatus_Wolfebacteria_bacterium_GW2011_GWA2_47_9b	0	0	0	1.99e-08	0	0	0	2.27e-08	0	0	0	2.05e-08	0	2.44e-08	4.83e-08
s__Burkholderia_plantarii	1.97e-08	4.25e-08	0	3.99e-08	0	0	2.29e-08	0	5.04e-08	0	0	4.11e-08	0	9.78e-08	4.83e-08
s__Oceanobacillus_manasiensis	2.24e-06	1.28e-06	2.72e-06	1.91e-06	2.06e-06	4.27e-06	6.41e-07	3.99e-06	4.26e-06	1.86e-06	3.16e-06	3.14e-06	1.72e-06	2.32e-06	1.79e-06
s__Pseudomonas_synxantha	3.93e-08	8.51e-08	9.01e-08	3.99e-08	2.29e-08	0	2.29e-08	6.8e-08	7.56e-08	2.52e-08	7.23e-08	4.11e-08	7.58e-08	4.89e-08	1.69e-07
s__Candidatus_Daviesbacteria_bacterium_GW2011_GWA2_39_33	9.83e-08	0	1.35e-07	3.99e-08	1.38e-07	1.34e-07	1.83e-07	2.27e-08	5.04e-08	2.52e-08	2.41e-08	2.05e-08	2.53e-08	2.44e-08	2.42e-08
s__Lactobacillus_wasatchensis	3.15e-07	1.06e-07	6.08e-07	5.58e-07	1.38e-07	1.26e-06	4.58e-08	2.2e-06	1.51e-06	1.01e-06	6.03e-07	1.46e-06	2.02e-07	1.08e-06	1.16e-06
s__Parcubacteria_group_bacterium_GW2011_GWA2_47_10	4.33e-07	2.34e-07	3.83e-07	3.19e-07	2.52e-07	2.96e-07	9.85e-07	1.81e-07	3.53e-07	3.27e-07	2.17e-07	2.88e-07	2.27e-07	2.93e-07	2.18e-07
s__Prochlorococcus_sp_MIT_1303	1.97e-07	8.51e-08	0	2.79e-07	6.88e-08	2.69e-08	1.37e-07	2.27e-08	0	7.55e-08	7.23e-08	0	1.26e-07	9.78e-08	4.83e-08
s__Kosmotoga_olearia	1.2e-06	6.17e-07	1.46e-06	2.17e-06	7.57e-07	2.8e-06	1.49e-06	1.52e-06	2.85e-06	5.03e-07	1.06e-06	2.12e-06	6.32e-07	1.49e-06	1.5e-06
s__Citrus_sinensis	1.18e-07	6.38e-08	9.01e-08	1.2e-07	9.17e-08	8.06e-08	1.6e-07	0	1.01e-07	7.55e-08	2.17e-07	6.16e-08	5.05e-08	0	9.67e-08
s__Candidatus_Nomurabacteria_bacterium_GW2011_GWC2_41_8	4.72e-07	0	1.35e-07	2.79e-07	2.29e-08	5.38e-08	9.16e-08	2.27e-08	0	5.03e-08	9.64e-08	1.03e-07	1.26e-07	2.44e-08	2.42e-08
s__Salisaeta_longa	6.49e-06	3.62e-06	5.38e-06	2.89e-06	7.38e-06	4.25e-06	5.01e-06	4.45e-06	5.14e-06	6.37e-06	3.74e-06	4.29e-06	3.69e-06	4.03e-06	3.34e-06
s__Drosophila_nasutoides	1.97e-08	0	0	0	0	0	2.29e-08	0	0	0	0	0	0	0	0
s__uncultured_Bacillus_sp	7.67e-07	9.15e-07	1.35e-06	7.78e-07	9.17e-07	7.8e-07	1.53e-06	2.27e-07	5.04e-07	6.54e-07	2.65e-07	4.52e-07	3.79e-07	3.67e-07	3.87e-07
s__Acidothermus_cellulolyticus	1.38e-07	3.62e-07	2.7e-07	5.39e-07	2.75e-07	9.95e-07	3.66e-07	9.07e-07	1.01e-06	3.27e-07	8.19e-07	6.57e-07	4.8e-07	5.62e-07	4.59e-07
s__uncultured_Halothermothrix_sp	0	0	0	0	0	0	2.29e-08	0	0	0	0	0	0	0	0
s__Lachnospiraceae_bacterium_NK4A136	1.79e-05	1.74e-05	1.51e-05	2.65e-05	1.96e-05	1.64e-05	1.69e-05	2.12e-05	2.32e-05	1.54e-05	2.59e-05	2.18e-05	1.87e-05	2.52e-05	2.69e-05
s__Gloeobacter_kilaueensis	4.33e-07	5.1e-07	7.43e-07	2.39e-07	7.34e-07	5.38e-07	1.26e-06	7.03e-07	7.56e-07	6.29e-07	4.82e-07	1.07e-06	7.33e-07	7.09e-07	7.25e-07
s__Mageeibacillus_indolicus	5.6e-06	5.25e-06	2.99e-06	8.22e-06	7.13e-06	4.41e-06	7.12e-06	4.47e-06	8.59e-06	4.28e-06	8.05e-06	6.8e-06	4.73e-06	1.39e-05	7.98e-06
s__Lactobacillus_acidophilus	2.28e-05	2.06e-05	5.03e-05	1.75e-05	5.45e-05	0.000127492	9.73e-05	3.94e-05	3.82e-05	0.000140713	7.33e-05	7e-05	3.1e-05	7.21e-05	0.00011292
s__Janthinobacterium_sp_Ant5-2-1	3.93e-08	0	4.5e-08	5.98e-08	1.38e-07	8.06e-08	2.29e-08	0	5.04e-08	2.52e-08	7.23e-08	4.11e-08	0	9.78e-08	0
s__Globodera_tabacum_solanacearum	3.93e-08	4.25e-08	2.25e-08	1.99e-08	2.29e-08	0	6.87e-08	4.54e-08	1.26e-07	2.52e-08	0	4.11e-08	5.05e-08	0	0
s__Bacillus_sp_UMTAT18	1.77e-07	3.19e-07	1.13e-07	3.99e-07	2.06e-07	5.38e-08	9.16e-08	1.59e-07	2.02e-07	7.55e-08	1.21e-07	3.29e-07	1.26e-07	5.62e-07	1.45e-07
s__Staphylococcus_hominis_subsp_hominis	5.9e-08	0	2.25e-07	3.99e-08	4.59e-08	5.38e-08	0	1.13e-07	2.27e-07	0	7.23e-08	0	0	9.78e-08	0
s__Synergistales_bacterium_53_16	1.65e-06	1.79e-06	1.33e-06	2.59e-06	8.48e-07	2.37e-06	1.14e-06	2.61e-06	1.54e-06	1.66e-06	2.02e-06	1.75e-06	2.5e-06	1.76e-06	2.68e-06
s__Oleiphilus_sp_HI0133	5.9e-08	0	0	0	9.17e-08	0	0	0	0	0	0	0	2.53e-08	0	0
s__Sanguibacter_keddieii	2.95e-07	2.13e-07	2.03e-07	3.59e-07	2.98e-07	2.15e-07	5.27e-07	1.36e-07	1.76e-07	1.26e-07	3.13e-07	5.55e-07	2.53e-07	4.64e-07	4.35e-07
s__Streptomyces_sp_Root1310	3.93e-08	0	2.25e-08	1.99e-08	0	0	0	0	0	0	0	0	0	0	0
s__Parcubacteria_group_bacterium_GW2011_GWA2_50_10b	3.54e-07	1.49e-07	2.03e-07	7.98e-08	2.52e-07	1.34e-07	2.75e-07	1.59e-07	1.51e-07	2.77e-07	1.45e-07	1.44e-07	5.05e-08	1.71e-07	9.67e-08
s__Encephalitozoon_romaleae	0	2.13e-08	0	0	0	5.38e-08	0	0	0	0	0	0	0	0	0
s__Prosthecochloris_aestuarii	1.2e-06	1.7e-06	1.62e-06	1.38e-06	1.44e-06	1.24e-06	1.1e-06	2.02e-06	1.51e-06	1.59e-06	1.3e-06	1.36e-06	1.31e-06	1.56e-06	2.1e-06
s__Paratrimastix_pyriformis	9.83e-08	0	9.01e-08	1.99e-08	0	1.34e-07	4.58e-08	2.27e-08	5.04e-08	2.01e-07	2.41e-08	6.16e-08	0	7.33e-08	0
s__Yamadazyma_tenuis	3.93e-08	0	0	1.4e-07	2.29e-08	5.38e-08	9.16e-08	0	0	0	2.41e-08	8.22e-08	0	0	2.42e-08
s__Prochlorococcus_sp_scB241_528P18	3.93e-08	4.25e-08	0	1.99e-08	1.38e-07	2.69e-08	4.58e-08	2.27e-08	0	2.52e-08	4.82e-08	4.11e-08	0	0	4.83e-08
s__uncultured_Alteromonadaceae_bacterium	0	2.13e-08	6.75e-08	1.99e-08	9.17e-08	7.26e-07	0	4.76e-07	6.3e-07	0	0	7.81e-07	0	9.78e-08	0
s__Virgibacillus_sp_IVG2-1	0	0	0	0	0	0	0	2.27e-08	0	0	0	0	0	0	0
s__Prevotella_sp_oral_taxon_299	0.000105727	0.00012876	0.000108747	7.1e-05	8.03e-05	9.73e-05	8.59e-05	8.46e-05	8.78e-05	0.000114992	7.28e-05	8.6e-05	9.65e-05	6.02e-05	8.19e-05
s__Hypholoma_sublateritium	0	0	0	0	0	5.38e-08	2.29e-08	4.54e-08	0	2.52e-08	0	0	0	0	1.21e-07
s__Thermoanaerobacter_brockii	0	0	9.01e-08	0	0	0	2.29e-08	0	0	0	4.82e-08	0	5.05e-08	2.44e-08	2.42e-08
s__uncultured_Propionibacterium_sp	0	0	0	0	2.29e-08	0	0	0	0	0	0	0	0	0	0
s__Pseudopropionibacterium_propionicum	1.91e-06	9.57e-07	2.03e-06	1.68e-06	1.51e-06	1.05e-06	1.51e-06	2.9e-06	1.18e-06	1.26e-06	9.64e-07	1.79e-06	1.64e-06	1.76e-06	1.43e-06
s__Roseburia_sp_CAG380	4.7e-05	1.92e-05	2.01e-05	0.000320862	7.76e-05	2.59e-05	6.59e-05	3.19e-05	4.53e-05	2.19e-05	8.1e-05	3.86e-05	2.53e-05	0.000229458	6.85e-05
s__Corynebacterium_diphtheriae	5.29e-06	6.34e-06	5.22e-06	6.26e-06	3e-06	6.13e-06	4.49e-06	2.86e-06	2.62e-06	7.22e-06	6.17e-06	2.98e-06	7.66e-06	4.74e-06	4.62e-06
s__Streptomyces_afghaniensis	7.86e-08	4.25e-08	1.58e-07	4.39e-07	1.83e-07	8.06e-08	1.6e-07	0	1.51e-07	3.78e-07	7.23e-08	4.11e-08	1.01e-07	3.42e-07	1.45e-07
s__Roseburia_faecis	0.00011827	6.87e-05	7.5e-05	0.000329897	0.000198605	5.67e-05	0.000143918	0.00012214	0.000169172	6.25e-05	0.000335216	0.000116033	8.17e-05	0.000326991	0.000211605
s__Bacillus_sp_154	0	0	0	0	0	0	4.58e-08	2.27e-08	5.04e-08	0	0	0	2.53e-08	9.78e-08	0
s__Rhizobium_sp_Root708	1.89e-06	1.06e-06	1.08e-06	5.98e-07	1.28e-06	2.42e-07	1.26e-06	5.44e-07	7.56e-07	5.79e-07	4.1e-07	1.05e-06	1.06e-06	5.62e-07	6.04e-07
s__Vibrio_phage_VBP47	0	0	0	0	0	0	0	0	0	0	0	0	2.53e-08	0	0
s__Spirillospora_albida	9.83e-08	6.38e-08	9.01e-08	2.19e-07	1.61e-07	2.69e-08	2.75e-07	2.27e-07	1.51e-07	7.55e-08	4.82e-08	2.26e-07	1.01e-07	2.93e-07	9.67e-08
s__Bartonella_melophagi	1.38e-06	5.96e-07	1.35e-06	7.38e-07	2.96e-06	1.08e-07	1.33e-06	1.36e-07	8.82e-07	7.05e-07	5.06e-07	8.22e-08	1.26e-07	4.16e-07	5.32e-07
s__Staphylococcus_phage_GRCS	0	0	0	1.99e-08	0	0	0	0	0	0	0	0	0	0	0
s__uncultured_marine_thaumarchaeote_KM3_88_B06	0	0	0	3.99e-08	0	0	0	0	0	0	0	0	0	0	0
s__Wolbachia_phage_WO	5.9e-08	2.13e-08	2.25e-08	1.99e-08	4.59e-08	1.34e-07	4.58e-08	9.07e-08	1.51e-07	7.55e-08	4.82e-08	2.05e-08	0	2.44e-08	4.83e-08
s__Parabacteroides_sp_CAG409	0.000828242	0.000886451	0.000866734	0.000718095	0.000687378	0.000808495	0.000736445	0.000806848	0.000678729	0.00084428	0.000656381	0.000716907	0.00098736	0.000511472	0.000752787
s__Citrobacter_sp_50677481	0	0	0	1.99e-08	4.59e-08	0	2.29e-08	2.27e-08	2.52e-08	0	0	2.05e-08	2.53e-08	2.44e-08	4.83e-08
s__Burkholderia_sp_E7m39	2.16e-07	3.4e-07	2.25e-07	6.38e-07	2.52e-07	1.61e-07	6.64e-07	1.81e-07	6.05e-07	3.27e-07	4.34e-07	2.26e-07	4.3e-07	1.25e-06	3.38e-07
s__Sporosarcina_sp_EUR3_222	4.13e-07	5.32e-07	3.38e-07	5.78e-07	1.61e-07	1.88e-07	2.52e-07	6.58e-07	6.55e-07	4.03e-07	3.13e-07	1.85e-07	2.27e-07	4.89e-07	1.93e-07
s__Streptomyces_sp_JHA19	1.77e-07	2.13e-08	1.13e-07	7.98e-08	9.17e-08	2.42e-07	2.29e-08	2.27e-07	2.02e-07	1.26e-07	2.41e-08	3.7e-07	5.05e-08	7.33e-08	7.25e-08
s__Actinobaculum_suis	7.47e-07	1.15e-06	4.95e-07	7.98e-07	8.03e-07	1.94e-06	6.41e-07	1.84e-06	1.76e-06	5.79e-07	1.49e-06	1.25e-06	7.08e-07	2.54e-06	1.76e-06
s__uncultured_bacterium_BAC10G6	0.00322466	0.00176261	0.00306212	0.00150969	0.00312129	0.00194452	0.0045153	0.00143635	0.0021434	0.00300491	0.00194309	0.00168948	0.00169736	0.00153371	0.00175387
s__Mycobacterium_virus_Courthouse	0	0	0	5.98e-08	0	0	0	0	5.04e-08	0	0	0	7.58e-08	0	0
s__Paraburkholderia_ferrariae	3.93e-07	4.47e-07	2.25e-07	9.97e-08	2.98e-07	5.38e-07	1.37e-07	4.31e-07	3.53e-07	2.52e-07	2.17e-07	9.04e-07	7.58e-07	3.42e-07	5.08e-07
s__Anoxybacillus_geothermalis	2.69e-06	1.49e-06	1.13e-06	1.76e-06	3.21e-06	1.1e-06	2.61e-06	1.02e-06	2.57e-06	2.42e-06	1.33e-06	1.5e-06	2.35e-06	2.76e-06	2.15e-06
s__Leptospirillum_ferrooxidans	1.18e-07	2.34e-07	1.13e-07	4.99e-07	2.29e-07	2.42e-07	3.66e-07	6.8e-08	1.76e-07	3.27e-07	3.37e-07	1.44e-07	1.52e-07	2.44e-07	5.32e-07
s__uncultured_bacterium_contig000032014	8.45e-07	1.51e-06	6.75e-07	4.19e-07	1.56e-06	7.53e-07	5.27e-07	2.27e-07	3.28e-07	6.29e-07	3.13e-07	6.78e-07	7.33e-07	3.67e-07	4.83e-07
s__Lactococcus_phage_P092	0	0	2.25e-08	0	0	0	0	0	0	0	0	0	0	0	0
s__Acidovorax_temperans	3.54e-07	2.98e-07	1.35e-07	1.8e-07	1.83e-07	2.42e-07	1.83e-07	1.81e-07	4.54e-07	2.27e-07	2.89e-07	5.96e-07	2.02e-07	4.64e-07	3.38e-07
s__Pseudomonas_virus_Ab18	9.83e-08	0	4.5e-08	0	9.17e-08	0	0	0	0	0	0	2.05e-08	0	0	0
s__Peptoniphilus_phoceensis	1.36e-06	6.17e-07	1.06e-06	2.01e-06	6.88e-07	7.26e-07	1.01e-06	8.39e-07	1.54e-06	4.28e-07	2.02e-06	1.07e-06	8.59e-07	1.74e-06	7.49e-07
s__Erwinia_oleae	4.72e-07	1.17e-06	1.13e-06	1.89e-06	1.38e-07	2.2e-06	7.56e-07	1.36e-06	1.16e-06	6.8e-07	9.4e-07	1.89e-06	2.2e-06	1.03e-06	1.55e-06
s__Wolbachia_endosymbiont_of_Cimex_lectularius	2.38e-06	4.13e-06	1.73e-06	5.23e-06	2.55e-06	7.26e-07	3.02e-06	1.79e-06	5.19e-06	9.31e-07	6e-06	1.73e-06	1.42e-06	7.94e-06	7.44e-06
s__Coprococcus_comes	0.000132641	0.00011468	0.000104717	0.000354251	0.000191817	0.000112761	0.000182594	0.000122389	0.000202886	8.54e-05	0.000340109	0.000267833	0.000138098	0.000398662	0.000370931
s__Thermococcus_piezophilus	1.97e-08	0	0	1.99e-08	0	0	0	0	2.52e-08	0	0	0	0	0	2.42e-08
s__Klebsiella_sp_10982	2.95e-07	2.55e-07	1.13e-07	1.2e-07	4.59e-08	1.08e-07	2.75e-07	2.72e-07	3.53e-07	2.52e-07	2.41e-08	1.03e-07	7.58e-08	2.44e-08	0
s__Poecilobdella_manillensis	1.18e-07	2.13e-07	5.4e-07	5.39e-07	2.75e-07	2.15e-07	2.52e-07	2.27e-07	1.76e-07	2.77e-07	1.21e-07	1.64e-07	1.01e-07	2.44e-08	1.21e-07
s__Streptomyces_sp_NRRL_F-2747	7.86e-08	2.13e-08	2.25e-08	2.79e-07	1.15e-07	1.08e-07	2.29e-08	0	0	1.76e-07	3.37e-07	1.64e-07	7.58e-08	2.2e-07	2.42e-08
s__Mycoplasma_californicum	1.06e-06	2.3e-06	2.7e-07	1.2e-07	5.5e-07	2.15e-07	1.24e-06	6.35e-07	9.83e-07	1.23e-06	2.41e-07	5.34e-07	1.01e-07	3.91e-07	2.66e-07
s__Pseudomonas_sp_MT-1	3.93e-08	0	4.5e-08	3.39e-07	9.17e-08	1.08e-07	2.29e-08	0	1.51e-07	5.03e-08	1.93e-07	2.05e-08	2.02e-07	6.6e-07	2.42e-08
s__Halapricum_salinum	1.57e-07	6.38e-08	6.75e-08	1.8e-07	1.15e-07	2.69e-08	1.83e-07	1.36e-07	2.52e-08	5.03e-08	2.41e-08	0	7.58e-08	5.87e-07	1.21e-07
s__Streptomyces_albus_subsp_albus	1.97e-07	6.38e-08	1.8e-07	9.97e-08	2.29e-08	2.42e-07	6.87e-08	6.8e-08	2.52e-08	5.03e-08	4.82e-08	1.64e-07	1.26e-07	1.22e-07	2.42e-07
s__Dietzia_alimentaria	2.81e-06	3.19e-07	3.6e-07	1.4e-07	1.22e-06	2.69e-07	3.43e-07	9.07e-08	2.27e-07	3.27e-07	9.64e-08	8.22e-08	1.01e-07	2.44e-07	1.69e-07
s__uncultured_bacterium_IN-01	1.97e-08	2.13e-08	0	7.98e-08	1.15e-07	0	0	0	0	0	2.41e-08	0	2.53e-08	0	2.42e-08
s__uncultured_bacterium_DCM007Kan05	3.93e-08	0	0	5.98e-08	1.38e-07	0	0	0	0	2.52e-08	2.41e-08	0	0	4.89e-08	7.25e-08
s__Trebouxiophyceae_sp_MX-AZ01	0	0	0	0	0	0	0	0	0	0	0	0	0	0	0
s__Trichoderma_gamsii	0	0	0	1.2e-07	0	2.69e-08	4.58e-08	2.27e-08	0	0	7.23e-08	2.05e-08	5.05e-08	0	0
s__Gemella_cuniculi	1.55e-06	7.23e-07	7.2e-07	1.44e-06	9.17e-07	1.1e-06	1.58e-06	1.09e-06	9.83e-07	9.06e-07	1.35e-06	1.77e-06	6.82e-07	1.81e-06	7.25e-07
s__Phytophthora_sojae	3.93e-08	2.13e-08	6.75e-08	0	2.29e-08	0	1.14e-07	8.39e-07	0	0	0	4.11e-08	0	1.22e-07	4.83e-08
s__Pseudomonas_virus_EL	5.9e-08	0	0	0	0	0	0	0	0	0	0	0	0	2.44e-08	0
s__Sphingomonas_sp_Leaf25	3.34e-07	1.13e-06	3.83e-07	8.78e-07	1.15e-07	1.08e-07	1.6e-07	2.72e-07	4.03e-07	7.05e-07	5.3e-07	1.64e-07	3.54e-07	9.78e-08	6.04e-07
s__Bulbostylis_barbata	0	0	0	0	0	0	2.29e-08	0	0	0	0	0	0	0	0
s__Listeria_weihenstephanensis	1.18e-06	4.04e-07	7.43e-07	1.24e-06	1.47e-06	8.6e-07	1.14e-06	1.2e-06	1.29e-06	8.05e-07	1.01e-06	1.07e-06	5.81e-07	8.07e-07	1.04e-06
s__Corynebacterium_renale	3.93e-08	0	2.25e-08	1.8e-07	1.83e-07	2.15e-07	3.43e-07	4.99e-07	7.56e-08	2.27e-07	4.82e-08	6.16e-08	5.05e-08	1.71e-07	1.45e-07
s__Bacillus_sp_SA1-12	4.15e-06	1.51e-06	2.9e-06	4.43e-06	4.77e-06	7.31e-06	3.55e-06	8.46e-06	9.12e-06	4.08e-06	5.5e-06	6.18e-06	2.58e-06	6.43e-06	6.07e-06
s__Actinomyces_sp_ICM58	8.65e-07	7.44e-07	7.88e-07	7.78e-07	5.73e-07	1.85e-06	4.12e-07	1.66e-06	1.13e-06	6.54e-07	1.93e-06	1.5e-06	1.44e-06	1.74e-06	2.01e-06
s__Lactobacillus_sanfranciscensis	7.08e-07	4.89e-07	1.13e-06	7.78e-07	1.01e-06	1.05e-06	1.85e-06	5.67e-07	7.31e-07	1.61e-06	1.01e-06	8.83e-07	7.08e-07	8.8e-07	4.59e-07
s__Nocardiopsis_sp_FU_40	1.97e-08	0	0	0	0	0	0	0	0	0	0	0	0	0	0
s__Acinetobacter_beijerinckii	1.63e-06	2.36e-06	1.4e-06	1.7e-06	1.03e-06	2.23e-06	7.79e-07	1.47e-06	1.49e-06	2.32e-06	1.9e-06	1.07e-06	3.89e-06	1.27e-06	1.35e-06
s__Elizabethkingia_anophelis	5.76e-05	7.25e-05	6.08e-05	5.93e-05	5.04e-05	5.93e-05	4.75e-05	4.97e-05	4.88e-05	6.65e-05	4.93e-05	4.52e-05	7.27e-05	4.06e-05	4.79e-05
s__Candidatus_Cloacimonas_sp_SDB	2.22e-06	1.53e-06	2.03e-06	2.31e-06	1.15e-06	1.24e-06	1.92e-06	1.18e-06	1.97e-06	1.56e-06	2.27e-06	2.1e-06	1.62e-06	1.74e-06	1.72e-06
s__uncultured_Prochlorococcus_sp	0	4.25e-08	2.25e-08	0	0	2.69e-08	0	2.95e-07	2.52e-08	7.55e-08	0	0	5.05e-08	0	0
s__Gorrdonia_virus_Nymphadora	0	0	0	0	4.59e-08	0	4.58e-07	0	5.04e-08	5.03e-08	0	2.05e-08	0	1.22e-07	0
s__Rhodobacteraceae_bacterium_HTCC2083	0	6.38e-08	6.75e-08	9.97e-08	9.17e-08	1.61e-07	0	0	5.04e-08	2.52e-08	9.64e-08	1.03e-07	7.58e-08	7.33e-08	1.69e-07
s__Austrofundulus_limnaeus	0	0	0	0	2.29e-08	2.69e-08	0	2.27e-08	0	2.52e-08	7.23e-08	0	0	7.33e-08	7.25e-08
s__uncultured_archaeon_GZfos26D8	0	0	0	0	0	0	2.29e-08	0	0	2.52e-08	0	0	0	0	0
s__Streptomyces_sp_HGB0020	1.77e-07	2.13e-08	6.75e-08	7.98e-08	4.59e-08	1.34e-07	4.58e-08	1.13e-07	2.52e-08	5.03e-08	2.41e-08	4.11e-08	2.53e-08	1.22e-07	1.21e-07
s__Mycobacterium_sp_IS-1590	7.86e-08	2.76e-07	2.25e-08	9.97e-08	2.29e-07	5.38e-08	9.16e-08	2.27e-08	1.26e-07	0	0	3.08e-07	2.53e-08	4.89e-08	0
s__Ramlibacter_tataouinensis	6.49e-07	8.08e-07	7.43e-07	6.98e-07	7.11e-07	1.16e-06	3.66e-07	2.77e-06	8.82e-07	9.82e-07	3.86e-07	1.56e-06	9.86e-07	6.84e-07	1.23e-06
s__Cronobacter_virus_PBES02	0	0	0	0	0	0	0	0	0	0	0	0	0	0	0
s__Salmonella_virus_f18SE	0	0	0	0	0	0	0	0	0	0	2.41e-08	0	0	0	0
s__Ascochyta_rabiei	1.77e-07	1.49e-07	0	2.19e-07	0	5.38e-08	0	4.54e-08	1.01e-07	2.52e-08	2.41e-08	2.05e-08	0	4.89e-08	0
s__uncultured_bacterium_Ad_142_N07	6.15e-06	5.25e-06	4.5e-06	4.49e-06	5.57e-06	3.76e-06	6.05e-06	6.49e-06	4.71e-06	5.64e-06	5.01e-06	6.64e-06	4.65e-06	3.37e-06	7.3e-06
s__Acinetobacter_sp_OIFC021	0	0	0	1.99e-08	0	0	0	0	0	0	1.45e-07	0	0	0	0
s__uncultured_Salmonella_sp	0	0	0	3.99e-08	0	0	0	0	0	0	2.41e-08	0	0	0	0
s__Drosophila_yakuba	0	0	2.25e-08	0	0	0	0	0	0	0	4.82e-08	0	0	0	0
s__Methanomicrobium_mobile	7.21e-06	6.4e-06	4.64e-06	8.74e-06	9.29e-06	3.79e-06	7.67e-06	5.31e-06	7.43e-06	6.07e-06	1.08e-05	5.44e-06	5.1e-06	1.16e-05	1.28e-05
s__Acetomicrobium_hydrogeniformans	1.18e-06	9.15e-07	9.68e-07	2.09e-06	8.71e-07	8.87e-07	1.19e-06	2.56e-06	1.56e-06	5.54e-07	1.76e-06	3.1e-06	1.24e-06	2.3e-06	2.27e-06
s__Aeromonas_jandaei	2.36e-07	2.55e-07	1.13e-07	4.19e-07	1.15e-07	2.42e-07	1.6e-07	4.54e-08	3.28e-07	2.52e-07	2.17e-07	1.03e-07	1.01e-07	1.22e-07	9.67e-08
s__Escherichia_virus_EK99P1	0	0	2.25e-08	0	0	0	0	0	0	0	0	0	0	0	0
s__Sporanaerobacter_acetigenes	0	0	0	0	0	0	0	0	2.52e-08	0	0	2.05e-08	0	0	0
s__Vibrio_genomosp_F10	1.1e-06	1.79e-06	1.22e-06	1.34e-06	1.1e-06	1.34e-06	1.42e-06	1.22e-06	2.27e-06	1.36e-06	1.18e-06	8.22e-07	1.74e-06	1.47e-06	1.6e-06
s__Devosia_sp_Leaf64	3.93e-08	2.13e-08	9.01e-08	3.79e-07	2.29e-08	1.08e-07	1.14e-07	1.36e-07	1.26e-07	0	3.62e-07	2.47e-07	2.53e-08	9.78e-08	0
s__Actinotignum_urinale	7.47e-07	4.47e-07	4.73e-07	9.77e-07	7.11e-07	1.77e-06	6.41e-07	2.34e-06	1.99e-06	1.21e-06	1.93e-06	1.48e-06	8.09e-07	2.49e-06	1.57e-06
s__Plasmodium_vinckei_vinckei	1.97e-08	0	0	0	0	0	0	0	0	0	0	0	0	0	0
s__Pseudovibrio_sp_POLY-S9	0	0	0	3.39e-07	1.38e-07	2.69e-08	4.58e-08	0	0	0	4.82e-08	6.16e-08	0	1.96e-07	0
s__Xanthomonas_nasturtii	1.77e-07	3.19e-07	4.5e-07	3.79e-07	2.29e-08	1.88e-07	1.6e-07	1.13e-07	2.52e-08	1.26e-07	2.65e-07	1.03e-07	3.29e-07	1.47e-07	1.45e-07
s__Pantoea_sp_aB	3.93e-08	0	2.25e-08	2.39e-07	9.17e-08	0	1.37e-07	2.27e-08	7.56e-08	0	9.64e-08	2.26e-07	1.26e-07	7.33e-08	4.83e-08
s__Pedobacter_sp_Leaf176	6.84e-06	5.59e-06	7.66e-06	7.34e-06	5.6e-06	8.9e-06	6.48e-06	8.07e-06	7.28e-06	7.45e-06	5.16e-06	6.68e-06	7.96e-06	4.74e-06	7.28e-06
s__Ralstonia_solanacearum	2.24e-06	2.49e-06	1.58e-06	1.4e-06	2.13e-06	2.45e-06	1.99e-06	1.91e-06	1.91e-06	2.87e-06	2.02e-06	2.42e-06	2.58e-06	1.96e-06	2.37e-06
s__Desulfococcus_multivorans	3.97e-06	2.36e-06	3.74e-06	4.17e-06	6.88e-06	2.2e-06	6.14e-06	2.52e-06	4.74e-06	2.77e-06	3.69e-06	2.36e-06	3.26e-06	5.33e-06	4.08e-06
s__Ruegeria_sp_R11	0	0	2.25e-08	0	0	0	0	0	2.52e-08	2.52e-08	4.82e-08	2.26e-07	0	0	0
s__Methanococcoides_methylutens	1.26e-06	1.15e-06	9.01e-07	2.43e-06	4.82e-07	1.37e-06	9.85e-07	8.85e-07	7.81e-07	1.08e-06	1.37e-06	1.07e-06	1.95e-06	1.32e-06	1.45e-06
s__Acinetobacter_sp_263903-2	0	0	0	0	0	0	0	0	0	0	0	0	0	0	0
s__uncultured_gamma_proteobacterium_HF0010_11B23	0	0	0	0	0	0	0	0	2.52e-08	0	0	0	0	0	0
s__Streptomyces_davaonensis	1.57e-07	4.68e-07	4.5e-08	7.98e-08	4.59e-08	1.61e-07	0	6.8e-08	1.26e-07	7.55e-08	4.82e-08	2.05e-08	2.53e-08	7.33e-08	2.42e-08
s__Ruminococcus_sp_CAG403	4.22e-05	1.29e-05	1.28e-05	4.98e-05	2.99e-05	1.21e-05	2.21e-05	0.000134047	2.44e-05	1.09e-05	3.14e-05	2.57e-05	1.83e-05	3.99e-05	2.63e-05
s__Microbacterium_aurum	3.93e-08	0	0	3.99e-08	0	0	4.58e-08	7.71e-07	0	0	4.82e-08	2.05e-08	0	0	0
s__Pectobacterium_virus_phiTE	7.86e-08	1.06e-07	9.01e-08	5.98e-08	0	2.15e-07	2.29e-08	2.27e-08	7.56e-08	1.01e-07	9.64e-08	1.03e-07	1.52e-07	4.89e-08	7.25e-08
s__Candidatus_Pelagibacter_ubique	1.69e-06	2.17e-06	1.58e-06	2.41e-06	1.31e-06	2.39e-06	1.05e-06	1.5e-06	1.21e-06	2.64e-06	2.12e-06	1.36e-06	2.27e-06	1.91e-06	1.79e-06
s__uncultured_marine_thaumarchaeote_KM3_200_B02	0	0	4.5e-08	1.99e-08	0	0	4.58e-08	0	5.04e-08	7.55e-08	0	2.05e-08	0	0	0
s__Croceicoccus_naphthovorans	2.95e-07	1.28e-07	5.63e-07	5.39e-07	1.61e-07	6.99e-07	3.21e-07	3.4e-07	7.81e-07	2.77e-07	3.86e-07	9.24e-07	1.77e-07	7.82e-07	2.66e-07
s__Yokenella_regensburgei	4.52e-07	5.32e-07	4.28e-07	5.78e-07	4.13e-07	4.03e-07	8.24e-07	5.22e-07	2.27e-07	5.54e-07	8.68e-07	4.31e-07	4.04e-07	4.64e-07	3.14e-07
s__Curtobacterium_sp_Leaf183	1.57e-07	2.13e-07	1.13e-07	3.19e-07	2.75e-07	2.15e-07	2.06e-07	2.95e-07	3.78e-07	3.52e-07	2.17e-07	2.05e-07	3.29e-07	1.71e-07	3.63e-07
s__Paecilomyces_sp_thermophila	0	0	0	0	0	0	4.58e-08	0	0	0	0	0	0	0	0
s__Rhodomicrobium_udaipurense	4.72e-07	2.76e-07	2.48e-07	5.19e-07	5.04e-07	5.38e-07	1.37e-07	9.07e-07	5.54e-07	4.03e-07	5.54e-07	6.78e-07	6.06e-07	4.64e-07	5.08e-07
s__Verrucomicrobiae_bacterium_DG1235	9.04e-06	1.28e-05	9.7e-06	1.02e-05	3.23e-06	2.16e-05	6.64e-06	1.78e-05	1.46e-05	9.66e-06	1.2e-05	1.78e-05	1.86e-05	1.06e-05	1.54e-05
s__Candidatus_Peregrinibacteria_bacterium_GW2011_GWA2_44_7	0	0	4.5e-08	7.98e-08	6.88e-08	0	6.87e-08	2.27e-08	0	5.03e-08	1.21e-07	8.22e-08	7.58e-08	2.44e-08	0
s__Zhouia_amylolytica	1.83e-05	1.62e-05	1.94e-05	9.93e-06	1.36e-05	1.14e-05	1.3e-05	1.72e-05	1.59e-05	1.26e-05	8.8e-06	1.59e-05	1.71e-05	7.16e-06	1.26e-05
s__Bacteroides_sp_CAG661	0.000673564	0.000772069	0.000695508	0.000597605	0.00060673	0.000736699	0.00065646	0.000640956	0.000601324	0.000717636	0.000530904	0.000601511	0.000799278	0.000460115	0.000649558
s__Vibrio_sp_HI00D65	7.86e-08	0	1.13e-07	5.98e-08	1.15e-07	8.06e-08	2.29e-08	9.07e-08	1.26e-07	2.52e-08	2.41e-08	1.23e-07	0	4.89e-08	4.83e-08
s__Microbulbifer_sp_HZ11	2.44e-06	7.02e-07	1.4e-06	1.06e-06	1.42e-06	1.91e-06	1.08e-06	2.38e-06	2.04e-06	1.89e-06	1.64e-06	1.75e-06	1.01e-06	1.49e-06	3.02e-06
s__Bacillus_sp_Soil531	1.38e-07	1.49e-07	2.25e-07	1.2e-07	6.88e-08	1.61e-07	9.16e-08	6.8e-08	1.01e-07	1.51e-07	1.21e-07	0	2.53e-08	1.71e-07	7.25e-08
s__Methyloferula_stellata	4.52e-07	3.19e-07	1.35e-07	1.08e-06	3.9e-07	5.64e-07	3.66e-07	3.63e-07	5.8e-07	5.54e-07	3.13e-07	1.64e-07	7.33e-07	3.42e-07	2.9e-07
s__Bacillus_sp_NSP222	2.44e-06	8.08e-07	2.14e-06	1.24e-06	2.06e-06	2.23e-06	2.06e-06	1.86e-06	3e-06	3.2e-06	2.72e-06	2.34e-06	1.47e-06	2.64e-06	2.15e-06
s__Microbacterium_sp_UCD-TDU	3.93e-08	0	0	1.99e-08	0	0	6.87e-08	0	5.04e-08	2.52e-08	4.82e-08	0	2.53e-08	9.78e-08	7.25e-08
s__Planctomyces_sp_SH-PL14	4.05e-06	5.59e-06	5e-06	4.85e-06	2.2e-06	6.59e-06	5.47e-06	3.52e-06	2.97e-06	4.15e-06	4.51e-06	4.15e-06	6.57e-06	3.69e-06	5.46e-06
s__Mycobacterium_bourgelatii	0	0	0	0	0	0	0	0	0	0	0	0	2.53e-08	0	0
s__Citrobacter_sp_BIDMC108	9.83e-08	1.7e-07	0	7.98e-08	4.59e-08	1.34e-07	1.14e-07	2.72e-07	7.56e-08	1.26e-07	9.64e-08	1.44e-07	7.58e-08	9.78e-08	3.87e-07
s__Arcanobacterium_haemolyticum	4.33e-07	4.04e-07	5.63e-07	6.98e-07	3.9e-07	2.42e-07	7.79e-07	1.29e-06	9.83e-07	5.79e-07	7.95e-07	6.57e-07	6.57e-07	1.32e-06	4.35e-07
s__Hanseniaspora_uvarum	1.97e-08	0	0	0	0	0	0	0	0	0	0	0	0	0	0
s__Clostridium_sp_CAG221	1.5e-05	6.06e-06	8.8e-06	1.98e-05	1.84e-05	1.17e-05	9.57e-06	1.26e-05	1.45e-05	5.74e-06	1.55e-05	1.13e-05	6.75e-06	1.64e-05	1.44e-05
s__Bacillus_panaciterrae	2.61e-06	3.93e-06	2.95e-06	4.69e-06	2.57e-06	3.98e-06	2.45e-06	2.56e-06	2.92e-06	2.94e-06	3.09e-06	3.06e-06	4.32e-06	3.42e-06	4.35e-06
s__Acidimicrobium_sp_BACL19_MAG-120924-bin39	2.36e-07	4.25e-08	3.15e-07	5.19e-07	1.15e-07	5.38e-08	5.04e-07	1.13e-07	1.26e-07	7.55e-08	4.82e-08	1.03e-07	1.26e-07	1.22e-07	0
s__Aureimonas_altamirensis	2.24e-06	6.17e-07	1.94e-06	1.52e-06	2.32e-06	2.26e-06	1.72e-06	1.34e-06	1.89e-06	1.38e-06	1.11e-06	1.89e-06	6.06e-07	1.03e-06	9.91e-07
s__Olsenella_profusa	1.85e-05	5.51e-06	6.66e-06	3.1e-05	6.99e-06	1.3e-05	1.16e-05	0.00017687	1.65e-05	7.02e-06	1.67e-05	2.21e-05	9.58e-05	0.000260356	2.36e-05
s__uncultured_bacterium_fosmid_pJB42G5	3.66e-06	3.38e-05	3.22e-06	1.6e-07	1.46e-05	2.23e-06	2.54e-06	7.03e-07	6.05e-07	3.67e-06	3.49e-06	2.12e-06	5.31e-07	3.23e-06	1.45e-07
s__Corynebacterium_ihumii	1.97e-08	0	4.5e-08	0	0	5.38e-08	2.29e-08	2.27e-08	0	0	0	0	0	2.44e-08	4.83e-08
s__Streptomyces_somaliensis	1.97e-08	0	2.25e-08	3.99e-08	6.88e-08	2.69e-08	2.29e-07	0	7.56e-08	0	0	4.11e-08	0	9.78e-08	2.42e-08
s__marine_actinobacterium_PHSC20C1	2.16e-07	0	2.93e-07	5.98e-07	1.38e-07	2.69e-08	8.24e-07	4.54e-08	2.27e-07	2.27e-07	9.64e-08	4.11e-08	1.01e-07	1.71e-07	1.21e-07
s__Algicola_sagamiensis	1.79e-06	2.57e-06	2.43e-06	2.53e-06	3.03e-06	1.34e-06	2.63e-06	8.39e-07	1.21e-06	2.47e-06	1.78e-06	1.03e-06	1.82e-06	1.17e-06	1.4e-06
s__Cellulomonas_sp_Leaf334	2.36e-07	1.7e-07	4.95e-07	7.78e-07	7.57e-07	3.23e-07	2.75e-07	4.08e-07	3.78e-07	1.76e-07	4.58e-07	5.14e-07	1.26e-07	6.84e-07	5.8e-07
s__Desulfovibrio_piger	5.62e-05	2.5e-05	4.07e-05	0.000247243	6.31e-05	5.51e-05	9.7e-05	8.52e-05	0.000208504	3.06e-05	0.000214801	9.28e-05	8.92e-05	0.000605363	0.000122999
s__Veillonella_sp_DNF00869	1.1e-06	7.66e-07	1.31e-06	2.07e-06	1.35e-06	1.85e-06	1.58e-06	1.79e-06	1.94e-06	7.8e-07	2.02e-06	1.46e-06	1.11e-06	1.91e-06	2.49e-06
s__Helicobacter_ailurogastricus	7.86e-07	5.53e-07	7.2e-07	4.79e-07	4.36e-07	4.3e-07	1.6e-07	4.54e-07	7.56e-07	8.56e-07	1.06e-06	5.96e-07	1.04e-06	1.42e-06	7.01e-07
s__Streptomyces_bicolor	2.75e-07	4.25e-08	4.5e-08	1.2e-07	4.59e-08	8.06e-08	9.16e-08	2.49e-07	4.03e-07	2.52e-08	9.64e-08	3.08e-07	2.27e-07	2.69e-07	1.21e-07
s__Pyrobaculum_islandicum	3.93e-08	2.13e-08	0	0	1.83e-07	0	4.58e-08	0	2.52e-08	2.52e-08	0	0	0	0	0
s__Weissella_confusa	5.5e-07	3.4e-07	2.25e-07	6.78e-07	4.82e-07	9.14e-07	4.12e-07	7.48e-07	7.31e-07	2.01e-07	7.47e-07	5.34e-07	4.55e-07	7.33e-07	7.25e-07
s__Burkholderia_pyrrocinia	9.83e-08	1.06e-07	9.01e-08	5.19e-07	2.06e-07	2.42e-07	2.06e-07	9.07e-08	2.02e-07	1.01e-07	1.93e-07	2.26e-07	3.79e-07	9.78e-08	2.18e-07
s__Gekko_japonicus	1.38e-07	0	9.01e-08	4.59e-07	9.17e-08	8.06e-08	1.37e-07	2.27e-08	0	2.52e-08	2.41e-08	6.16e-08	7.58e-08	9.78e-08	0
s__Moraxella_phage_Mcat17	0	0	0	0	0	0	4.58e-08	0	0	0	0	0	0	0	0
s__uncultured_bacterium_DCM002Carb01	2.36e-07	4.04e-07	3.15e-07	4.99e-07	0	3.23e-07	2.29e-07	3.18e-07	2.52e-08	3.27e-07	4.34e-07	3.08e-07	8.09e-07	4.64e-07	3.63e-07
s__uncultured_archaeon_GZfos30H9	0	0	0	0	0	0	2.29e-08	0	0	0	0	0	0	0	0
s__Roseobacter_denitrificans	3.34e-07	1.7e-07	5.63e-07	6.18e-07	3.44e-07	5.91e-07	2.52e-07	2.04e-07	1.51e-07	5.29e-07	1.93e-07	2.47e-07	5.31e-07	3.67e-07	2.18e-07
s__Hungatella_hathewayi	0.000547391	0.000595051	0.000318113	0.00177837	0.000863488	0.000347154	0.000801798	0.000397901	0.000944632	0.00034266	0.00145374	0.000662178	0.000559293	0.0025777	0.00146983
s__Thermus_amyloliquefaciens	7.86e-08	1.7e-07	9.01e-08	1.8e-07	4.59e-08	4.84e-07	2.98e-07	5.22e-07	6.05e-07	2.27e-07	3.86e-07	3.9e-07	1.01e-07	9.53e-07	3.38e-07
s__Firmicutes_bacterium_CAG240	4.68e-05	3.77e-05	3.31e-05	4.96e-05	4.39e-05	3.8e-05	7.8e-05	5.53e-05	7.07e-05	4.01e-05	5.37e-05	4.01e-05	3.83e-05	9.1e-05	5.15e-05
s__Coprococcus_sp_ART55/1	5.35e-06	5.89e-06	5.29e-06	1.82e-05	1.64e-05	8.57e-06	1.06e-05	8.6e-06	1.25e-05	5.56e-06	2.47e-05	9.22e-06	7.2e-06	2.51e-05	1.73e-05
s__Neolentinus_lepideus	1.97e-08	2.13e-08	0	5.98e-08	0	5.38e-08	0	0	0	0	4.82e-08	8.22e-08	0	0	2.42e-08
s__Rhizobium_sp_CF142	5.9e-08	2.13e-08	6.75e-08	9.97e-08	4.59e-08	5.38e-08	4.58e-08	1.13e-07	1.26e-07	2.52e-08	0	2.05e-08	1.26e-07	1.47e-07	7.25e-08
s__Methylobacterium_sp_Leaf121	9.83e-08	2.13e-08	9.01e-08	5.39e-07	6.88e-08	8.06e-08	1.6e-07	2.27e-08	0	1.01e-07	0	0	1.01e-07	4.89e-08	7.25e-08
s__Psychrobacter_sp_P2G3	9.04e-07	0	3.38e-07	1.4e-07	2.34e-06	2.69e-08	0	1.13e-07	7.56e-08	2.52e-08	7.23e-08	4.11e-08	2.53e-08	0	0
s__Colwellia_sp_MT2012	1.08e-06	7.66e-07	6.53e-07	5.98e-07	4.59e-07	1.42e-06	2.29e-07	3.27e-06	1.81e-06	2.01e-07	9.88e-07	2.18e-06	1.49e-06	9.78e-07	3.55e-06
s__Apis_dorsata	7.86e-08	6.38e-08	6.75e-08	1.99e-07	6.88e-08	0	4.58e-08	2.27e-08	0	0	2.41e-08	2.05e-08	5.05e-08	4.89e-08	0
s__Candidatus_Methylopumilus_planktonicus	1.97e-07	2.55e-07	9.01e-08	3.39e-07	9.17e-08	1.61e-07	6.87e-08	7.26e-07	2.52e-08	1.01e-07	4.82e-08	2.67e-07	1.52e-07	2.69e-07	1.45e-07
s__Rhodospirillum_rubrum	1.42e-06	6.38e-07	1.4e-06	1.22e-06	8.48e-07	1.1e-06	1.67e-06	6.12e-07	1.13e-06	1.66e-06	1.37e-06	1.19e-06	1.36e-06	2.52e-06	1.23e-06
s__Treponema_socranskii_subsp_paredis	1.36e-06	1.34e-06	1.08e-06	2.07e-06	2.45e-06	4.38e-06	1.33e-06	3.77e-06	4.16e-06	2.57e-06	2.92e-06	3.29e-06	1.19e-06	3.06e-06	2.56e-06
s__Arthrobacter_sp_Edens01	8.65e-07	3.62e-07	6.3e-07	2.79e-07	4.82e-07	4.57e-07	7.33e-07	1.36e-07	4.54e-07	7.3e-07	5.54e-07	4.11e-07	2.53e-07	6.36e-07	4.35e-07
s__Helicobacter_pylori	9.4e-06	7.04e-06	7.29e-06	5.13e-06	1.4e-05	1.59e-05	1.19e-05	1.82e-05	3.03e-05	1.49e-05	2.73e-05	2.02e-05	1.27e-05	5.15e-05	3.62e-05
s__uncultured_Parcubacteria_bacterium_Rifle_16ft_4_minimus_23790	0	0	0	0	0	0	0	0	0	0	4.82e-08	0	0	0	0
s__Adhaeribacter_aquaticus	1.75e-05	1.86e-05	1.83e-05	1.54e-05	1.65e-05	1.59e-05	1.68e-05	1.3e-05	1.31e-05	1.85e-05	1.26e-05	1.26e-05	1.65e-05	1.03e-05	1.23e-05
s__Spironucleus_salmonicida	7.86e-08	2.13e-07	1.35e-07	3.99e-08	6.88e-08	8.06e-08	1.14e-07	0	0	7.55e-08	7.23e-08	2.05e-08	7.58e-08	2.44e-08	4.83e-08
s__Crithidia_acanthocephali	3.93e-08	0	2.25e-08	5.98e-08	2.29e-08	0	0	4.54e-08	5.04e-08	0	0	4.11e-08	0	7.33e-08	0
s__Xylella_phage_Sano	0	0	0	1.99e-08	0	0	0	0	0	0	0	0	0	0	0
s__Urocerus_gigas	0	0	0	0	0	0	0	0	0	0	0	0	0	0	0
s__Hydrogenobaculum_sp_3684	0	0	0	3.99e-08	0	0	2.29e-08	0	2.52e-08	0	0	4.11e-08	2.53e-08	1.71e-07	2.42e-08
s__Thiomonas_sp_B1	1.97e-08	4.25e-08	6.75e-08	1.8e-07	6.88e-08	2.69e-08	2.29e-08	1.13e-07	5.04e-08	2.52e-08	0	2.05e-08	2.53e-08	2.44e-08	0
s__Staphylococcus_phage_pSco-10	1.97e-08	0	9.01e-08	7.98e-08	0	0	0	0	0	0	0	0	5.05e-08	7.33e-08	0
s__Firmicutes_bacterium_CAG341	2.06e-05	1.92e-05	5.92e-06	5.28e-05	6.49e-06	3.71e-05	0.000136362	0.000830527	1.74e-05	6.59e-06	0.000107955	6.39e-05	2.2e-05	8.17e-05	0.000154758
s__Pirellula_staleyi	1.02e-06	5.96e-07	7.2e-07	1.64e-06	4.36e-07	9.14e-07	1.53e-06	1.5e-06	1.29e-06	9.31e-07	1.49e-06	1.38e-06	1.09e-06	1.86e-06	1.04e-06
s__Erythrobacter_sp_HI0019	3.93e-08	0	2.25e-08	1.99e-08	4.59e-08	0	0	0	5.04e-08	0	1.21e-07	2.05e-08	0	2.44e-08	2.42e-08
s__Robiginitomaculum_antarcticum	5.31e-07	5.1e-07	7.88e-07	6.58e-07	5.04e-07	5.91e-07	1.33e-06	2.27e-07	5.04e-07	9.06e-07	2.89e-07	3.7e-07	5.05e-07	7.58e-07	5.32e-07
s__Leuconostoc_lactis	8.65e-07	1.55e-06	2.65e-05	3.57e-06	1.5e-05	8.87e-07	6.82e-06	2.9e-06	8.57e-06	2.62e-06	3.37e-06	1.05e-06	7.83e-07	2.88e-06	1.14e-06
s__Cellulophaga_phage_phi193	0	0	0	0	2.29e-08	0	0	0	0	0	0	0	0	0	0
s__Achromobacter_arsenitoxydans	2.56e-06	1.04e-06	1.31e-06	4.39e-07	2.22e-06	6.45e-07	9.85e-07	5.9e-07	1.44e-06	1.54e-06	8.44e-07	1.36e-06	1.97e-06	8.8e-07	1.26e-06
s__Paramesorhizobium_deserti	6.09e-07	3.62e-07	3.6e-07	5.19e-07	4.36e-07	8.33e-07	3.21e-07	5.67e-07	1.01e-06	6.54e-07	4.58e-07	8.22e-07	3.29e-07	6.36e-07	5.56e-07
s__uncultured_gamma_proteobacterium_HF0200_24F15	0	0	0	0	0	0	0	0	0	0	0	2.05e-08	0	0	0
s__butyrate-producing_bacterium_SM4/1	5.88e-06	6.59e-06	4.46e-06	1.33e-05	1.07e-05	3.71e-06	1.37e-05	3.77e-06	9.6e-06	3.27e-06	2.05e-05	6.64e-06	4.19e-06	2.22e-05	1.09e-05
s__Fusobacterium_hwasookii	8.37e-06	5.1e-06	6.21e-06	8.5e-06	1.2e-05	4.17e-06	7.24e-06	6.12e-06	7.79e-06	5.66e-06	7.59e-06	5.38e-06	3.69e-06	1.19e-05	7.4e-06
s__Acinetobacter_baylyi	7.86e-08	2.13e-08	0	9.97e-08	4.59e-08	0	6.87e-08	0	0	0	1.21e-07	0	0	1.22e-07	7.25e-08
s__Serratia_proteamaculans	1.77e-07	2.13e-08	2.25e-08	1.2e-07	1.15e-07	1.08e-07	9.16e-08	1.36e-07	1.76e-07	5.03e-08	1.21e-07	1.64e-07	1.26e-07	1.47e-07	9.67e-08
s__Exiguobacterium_marinum	7.47e-07	1.04e-06	7.2e-07	1.32e-06	7.57e-07	7.8e-07	6.41e-07	8.17e-07	8.82e-07	4.78e-07	6.51e-07	6.57e-07	8.59e-07	1.25e-06	1.18e-06
s__Sphingobacteriaceae_bacterium_DW12	3.81e-05	4.67e-05	4.06e-05	3.67e-05	4.69e-05	3.62e-05	4.26e-05	2.72e-05	2.74e-05	4.13e-05	3.17e-05	2.53e-05	4.6e-05	2.31e-05	3.45e-05
s__uncultured_gamma_proteobacterium_HF0010_05D02	3.93e-08	0	0	0	0	0	0	0	0	0	0	0	0	0	0
s__Coprobacillus_sp_CAG235	2.28e-05	1.51e-05	1.45e-05	3.21e-05	1.5e-05	6.32e-05	1.01e-05	6.79e-05	5.94e-05	2.71e-05	3.54e-05	5e-05	1.49e-05	5.03e-05	3.56e-05
s__Aganosma_cymosa	0	0	0	0	0	0	0	2.27e-08	0	0	0	0	0	0	0
s__Cladophialophora_immunda	1.97e-08	2.13e-08	4.5e-08	1.2e-07	0	0	2.29e-08	9.07e-08	5.04e-08	2.52e-08	9.64e-08	8.22e-08	5.05e-08	7.33e-08	9.67e-08
s__Pseudomonas_sp_TAA207	0	0	0	7.98e-08	0	0	0	0	0	0	0	2.05e-08	0	0	0
s__Kutzneria_albida	5.11e-07	3.83e-07	4.5e-07	4.79e-07	2.98e-07	5.11e-07	4.58e-07	5.9e-07	2.27e-07	8.05e-07	2.89e-07	2.88e-07	4.55e-07	1.96e-07	5.32e-07
s__Frankia_symbiont_of_Datisca_glomerata	3.74e-07	2.55e-07	4.73e-07	6.58e-07	3.44e-07	4.57e-07	5.27e-07	2.95e-07	5.29e-07	4.53e-07	6.27e-07	5.34e-07	5.05e-07	1.03e-06	7.49e-07
s__Stegodyphus_mimosarum	1.97e-08	0	2.25e-08	9.97e-08	0	0	1.14e-07	4.54e-08	5.04e-08	0	9.64e-08	0	1.52e-07	0	0
s__Streptomyces_purpureus	7.86e-08	8.51e-08	9.01e-07	9.97e-08	1.83e-07	2.42e-07	1.14e-07	6.8e-08	2.27e-07	2.52e-08	2.89e-07	8.22e-08	0	2.44e-08	7.25e-08
s__uncultured_archaeon_GZfos28G7	0	2.34e-07	0	2.99e-07	2.75e-07	1.08e-07	1.6e-07	2.27e-08	2.52e-08	1.26e-07	4.82e-08	0	1.52e-07	4.89e-08	9.67e-08
s__Bacillus_sp_SJS	1.3e-06	1.06e-06	1.4e-06	2.47e-06	8.71e-07	1.8e-06	1.76e-06	1.68e-06	1.76e-06	1.64e-06	1.71e-06	1.4e-06	1.19e-06	2.18e-06	2.18e-06
s__Geothrix_fermentans	1.81e-06	1.55e-06	1.08e-06	1.22e-06	1.97e-06	9.95e-07	1.49e-06	1.2e-06	9.57e-07	2.32e-06	1.47e-06	1.25e-06	1.24e-06	1.47e-06	1.26e-06
s__Acidibacillus_ferrooxidans	4.38e-06	4.81e-06	3.22e-06	3.95e-06	4.93e-06	2.15e-06	3.02e-06	1.59e-06	3.23e-06	2.01e-06	4.6e-06	2.96e-06	2.55e-06	5.13e-06	2.37e-06
s__Aeromonas_lacus	1.97e-08	0	0	1.99e-08	2.29e-08	2.69e-08	2.29e-08	0	2.52e-08	2.52e-08	2.41e-08	8.22e-08	2.53e-08	0	2.42e-08
s__Staphylococcus_capitis_subsp_capitis	0	0	1.13e-07	1.99e-08	0	0	2.29e-08	0	0	0	0	0	0	0	0
s__Eubacterium_sp_3_1_31	0.000180786	9.33e-05	0.000192525	0.000139977	0.000247425	0.000178752	8.93e-05	0.000166369	0.000172145	8.1e-05	0.000100676	0.000107528	6.93e-05	0.000271772	0.000105017
s__Thermoanaerobacter_mathranii	1.81e-06	1.34e-06	6.98e-07	1.3e-06	1.38e-06	1.32e-06	2.06e-06	4.31e-07	1.51e-06	1.06e-06	1.64e-06	8.01e-07	1.19e-06	1.05e-06	1.02e-06
s__Paenibacillus_sp_1-18	8.85e-07	3.62e-07	9.23e-07	1.6e-06	4.7e-06	2.42e-07	4.81e-07	1.04e-06	9.32e-07	4.28e-07	6.03e-07	8.22e-07	3.54e-07	8.31e-07	1.35e-06
s__Parcubacteria_group_bacterium_GW2011_GWB1_42_9	5.9e-08	0	2.03e-07	5.98e-08	1.15e-07	5.38e-08	2.29e-07	2.27e-08	7.56e-08	1.51e-07	0	6.16e-08	1.77e-07	7.33e-08	4.83e-08
s__Erythrobacter_vulgaris	1.38e-07	2.13e-08	6.75e-08	9.97e-08	0	5.38e-08	3.43e-07	0	1.76e-07	2.01e-07	0	1.03e-07	7.58e-08	4.89e-08	2.42e-08
s__Flavobacterium_sp_316	1.16e-05	1.45e-05	1.37e-05	9.63e-06	1.04e-05	1.12e-05	9.3e-06	1.08e-05	1e-05	1.36e-05	1.02e-05	8.14e-06	1.67e-05	7.06e-06	1.03e-05
s__Leifsonia_xyli_subsp_cynodontis	0	0	4.5e-08	7.98e-08	4.59e-08	1.08e-07	0	1.13e-07	0	7.55e-08	0	0	0	2.44e-08	0
s__Formosa_agariphila	8.41e-06	1.19e-05	1.13e-05	9.45e-06	5.43e-06	1.05e-05	8.56e-06	8.17e-06	6.68e-06	9.14e-06	7.62e-06	7.21e-06	1.04e-05	5.74e-06	7.9e-06
s__Trichomonas_vaginalis	2.84e-05	2.23e-05	2.5e-05	2.5e-05	2.01e-05	2.52e-05	2.69e-05	3.47e-05	2.29e-05	3.06e-05	2.1e-05	2.21e-05	2.69e-05	1.78e-05	2.5e-05
s__Microbacterium_sp_Root322	0	0	2.25e-08	0	0	0	9.16e-08	0	0	0	7.23e-08	0	2.53e-08	0	0
s__Xanthomonas_citri	8.06e-07	3.4e-07	7.2e-07	3.39e-07	8.03e-07	2.15e-07	7.56e-07	3.4e-07	6.55e-07	8.81e-07	2.17e-07	3.9e-07	4.3e-07	8.07e-07	5.8e-07
s__Mannheimia_haemolytica	7.55e-06	3.53e-06	7.86e-06	4.25e-06	6.35e-06	7.77e-06	7.81e-06	7.17e-06	7.89e-06	6.44e-06	4.94e-06	8.73e-06	4.12e-06	6.01e-06	4.08e-06
s__Acidobacteriaceae_bacterium_TAA166	1.87e-06	2.36e-06	9.46e-07	1.89e-06	7.57e-07	2.23e-06	1.31e-06	2.79e-06	1.84e-06	2.44e-06	2.22e-06	2.26e-06	3.69e-06	2.15e-06	3.34e-06
s__Eisenibacter_elegans	1.49e-05	1.24e-05	1.8e-05	1.3e-05	1.9e-05	1.15e-05	1.62e-05	1.11e-05	1.23e-05	1.5e-05	1.21e-05	1.11e-05	1.4e-05	8.97e-06	1.28e-05
s__Rhizobium_sp_NT-26	6.68e-07	4.47e-07	4.73e-07	3.99e-07	7.11e-07	7.53e-07	6.87e-07	2.02e-06	1.31e-06	3.78e-07	8.44e-07	1.23e-06	1.01e-06	1.44e-06	1.11e-06
s__Syntrophococcus_sucromutans	1.97e-08	8.51e-08	6.75e-08	1.2e-07	1.15e-07	2.69e-08	4.58e-08	6.8e-08	2.52e-08	0	1.21e-07	4.11e-08	2.53e-08	1.47e-07	4.83e-08
s__Macaca_fascicularis	5.9e-07	1.28e-07	4.5e-07	8.18e-07	4.59e-08	5.38e-07	1.85e-06	5.22e-07	1.01e-07	6.8e-07	4e-06	2.05e-07	5.05e-08	2.44e-08	5.08e-07
s__Bradyrhizobium_sp_CCH10-C7	9.83e-08	2.13e-07	1.13e-07	2.39e-07	2.06e-07	1.88e-07	4.58e-07	1.13e-07	7.56e-08	1.51e-07	1.93e-07	1.44e-07	4.3e-07	3.42e-07	2.42e-07
s__Orcinus_orca	9.83e-08	1.06e-07	0	5.98e-08	2.29e-08	1.08e-07	4.58e-08	0	0	1.01e-07	0	4.11e-08	0	0	1.21e-07
s__Firmicutes_bacterium_CAG791	1.9e-05	1.09e-05	1.11e-05	5.43e-05	2.41e-05	2.24e-05	2.51e-05	2.77e-05	3.35e-05	1.35e-05	3.92e-05	2.6e-05	1.5e-05	4.93e-05	4.29e-05
s__uncultured_bacterium_413004-H17	2.1e-06	9.15e-07	2.21e-06	2.53e-06	4.59e-08	2.85e-05	0	2.54e-05	2.45e-05	1.01e-05	1.27e-05	1.63e-05	2.45e-06	8.85e-06	1.14e-05
s__uncultured_Termite_group_1_bacterium	9.24e-07	8.51e-07	7.2e-07	1.26e-06	9.17e-07	1.02e-06	1.03e-06	1.25e-06	9.32e-07	6.29e-07	8.68e-07	9.24e-07	1.04e-06	1.22e-06	8.7e-07
s__Catenibacillus_scindens	0	0	0	1.99e-08	0	0	0	0	0	0	2.41e-08	0	5.05e-08	2.44e-08	0
s__Hadesarchaea_archaeon_DG-33-1	0	4.25e-08	0	1.99e-08	2.29e-08	2.69e-08	2.29e-08	1.36e-07	2.52e-08	0	2.41e-08	0	0	2.44e-08	0
s__Limulus_polyphemus	7.86e-08	0	2.25e-08	1.4e-07	2.29e-08	0	0	2.04e-07	0	7.55e-08	1.45e-07	6.16e-08	2.53e-08	4.89e-08	2.42e-08
s__Corynebacterium-like_bacterium_B27	2.36e-07	1.91e-07	3.15e-07	3.19e-07	2.29e-07	5.38e-08	6.18e-07	2.27e-07	2.27e-07	1.26e-07	1.69e-07	1.03e-07	2.53e-07	4.64e-07	2.42e-07
s__Pseudomonas_fuscovaginae	3.7e-06	1.72e-06	3.76e-06	4.05e-06	4.31e-06	2.26e-06	2.7e-06	2.56e-06	3e-06	2.99e-06	1.54e-06	1.83e-06	1.82e-06	2e-06	2.03e-06
s__Clostridium_phage_phiCP26F	5.9e-08	1.28e-07	4.5e-08	7.98e-08	1.61e-07	0	6.87e-08	2.27e-08	2.52e-08	0	2.17e-07	1.23e-07	0	9.78e-08	9.67e-08
s__Clostridium_sp_enrichment_culture_clone_7-14	2.3e-06	1.85e-06	1.04e-06	2.61e-06	4.08e-06	9.14e-07	2.04e-06	1.52e-06	3.35e-06	6.8e-07	4.24e-06	1.95e-06	2.58e-06	4.64e-06	3.12e-06
s__Monosiga_brevicollis	2.16e-07	2.13e-08	2.03e-07	1.6e-07	9.17e-08	1.61e-07	1.14e-07	9.07e-08	2.27e-07	3.78e-07	3.37e-07	1.44e-07	2.53e-07	2.93e-07	1.45e-07
s__Bartonella_bacilliformis	9.83e-08	1.28e-07	6.75e-08	1.8e-07	2.06e-07	1.08e-07	3.43e-07	2.27e-08	7.56e-08	5.03e-08	1.69e-07	2.05e-07	1.52e-07	7.33e-08	4.83e-08
s__uncultured_bacterium_Contig99	5.11e-07	7.66e-07	5.18e-07	1.78e-06	1.08e-06	6.18e-07	8.93e-07	5.67e-07	1.21e-06	4.78e-07	1.49e-06	2.03e-06	9.86e-07	3.37e-06	1.43e-06
s__Hoeflea_sp_IMCC20628	1.57e-07	3.19e-07	9.01e-08	2.79e-07	2.06e-07	1.88e-07	2.29e-07	4.54e-08	2.52e-08	2.27e-07	3.62e-07	3.08e-07	5.31e-07	2.93e-07	3.87e-07
s__Dietzia_papillomatosis	3.93e-08	0	6.75e-08	5.98e-08	2.29e-08	0	9.16e-08	4.54e-08	1.76e-07	1.51e-07	9.64e-08	1.44e-07	2.53e-08	2.93e-07	0
s__Parasitella_parasitica	1.97e-08	2.13e-08	2.25e-08	0	2.29e-08	0	6.87e-08	4.54e-08	5.04e-08	0	2.41e-08	2.05e-08	2.53e-08	0	0
s__Haemophilus_massiliensis	9.63e-07	6.81e-07	9.23e-07	9.17e-07	7.57e-07	1.72e-06	5.27e-07	1.81e-06	2.12e-06	3.52e-07	5.78e-07	2.77e-06	7.33e-07	9.53e-07	7.25e-07
s__uncultured_bacterium_pA1	0	0	0	1.99e-08	0	2.69e-08	2.29e-08	0	0	0	0	0	0	0	0
s__Serratia_entomophila	0	0	0	5.98e-08	0	0	0	0	0	2.52e-08	0	0	0	0	2.42e-08
s__Methanolinea_tarda	1.18e-07	1.28e-07	9.01e-08	2.79e-07	4.59e-08	2.69e-08	1.37e-07	1.13e-07	1.26e-07	5.03e-08	4.82e-08	1.03e-07	0	2.93e-07	1.69e-07
s__uncultured_bacterium_r_01	3.93e-08	0	0	2.19e-07	2.29e-08	0	0	2.27e-08	2.52e-08	0	2.41e-08	8.22e-08	0	7.33e-08	1.21e-07
s__Oesophagostomum_dentatum	1.97e-08	0	9.01e-08	9.97e-08	2.29e-08	2.69e-08	0	2.27e-08	0	2.52e-08	0	4.11e-08	0	4.89e-08	2.42e-08
s__Enterococcus_casseliflavus	8.36e-06	5.38e-06	1.1e-05	1.2e-05	9.61e-06	3.19e-05	5.18e-06	2.92e-05	3.22e-05	1.38e-05	1.84e-05	2.22e-05	7.35e-06	1.84e-05	2e-05
s__Synechococcus_sp_WH_8016	5.11e-07	5.32e-07	6.75e-07	5.78e-07	7.34e-07	6.18e-07	2.52e-07	2.95e-07	4.28e-07	9.06e-07	3.86e-07	3.08e-07	8.59e-07	3.18e-07	5.8e-07
s__uncultured_bacterium_fss6	1.97e-08	0	0	0	0	0	2.29e-08	0	0	0	0	2.05e-08	0	0	0
s__Firmicutes_bacterium_CAG212	2.18e-05	1.61e-05	1.2e-05	6.81e-05	2.31e-05	2.07e-05	2.64e-05	2.16e-05	3.4e-05	9.87e-06	7.97e-05	5.06e-05	1.72e-05	5.12e-05	0.000129114
s__Treponema_lecithinolyticum	4.11e-06	4.51e-06	3.24e-06	7.5e-06	4.77e-06	3.01e-06	6.11e-06	4.01e-06	4.43e-06	3.1e-06	5.98e-06	4.03e-06	5.86e-06	8.34e-06	5.05e-06
s__Coprococcus_sp_CAG131	4.78e-06	2.15e-06	1.67e-06	8.4e-06	4.86e-06	2.47e-06	5.38e-06	6.85e-06	4.79e-06	3.6e-06	4.89e-06	3.18e-06	2.8e-06	9.36e-06	5.51e-06
s__Mus_musculus_wagneri	0	0	0	0	0	0	0	0	0	2.52e-08	0	0	0	0	0
s__Salmo_salar	2.16e-07	6.38e-08	1.58e-07	6.78e-07	9.17e-08	1.34e-07	4.81e-07	6.8e-08	2.27e-07	1.51e-07	8.44e-07	1.85e-07	1.26e-07	5.62e-07	1.93e-07
s__Leptospira_alstonii	2.75e-07	2.13e-07	1.35e-07	1.8e-07	3.44e-07	1.08e-07	1.83e-07	1.59e-07	1.26e-07	1.26e-07	2.17e-07	8.22e-08	1.26e-07	3.18e-07	1.21e-07
s__Firmicutes_bacterium_CAG83	4.43e-05	6.52e-05	3.34e-05	5.74e-05	7.18e-05	2.65e-05	4.6e-05	4.58e-05	7.86e-05	2.42e-05	6.06e-05	5.59e-05	7.29e-05	0.000137817	6.48e-05
s__Candidatus_Amesbacteria_bacterium_GW2011_GWC2_47_8	1.18e-07	0	2.25e-08	9.97e-08	1.38e-07	1.61e-07	3.21e-07	2.27e-08	7.56e-08	5.03e-08	2.41e-08	0	2.02e-07	9.78e-08	1.21e-07
s__Streptococcus_parasanguinis	7.86e-06	8.08e-06	1.18e-05	1.39e-05	1.16e-05	1.05e-05	9.46e-06	8.01e-06	1.16e-05	8.31e-06	1.25e-05	7.48e-06	8.34e-06	1.61e-05	1.08e-05
s__Burkholderia_virus_Bcep43	0	0	0	0	0	0	0	4.54e-08	0	0	0	0	0	0	0
s__Linepithema_humile	1.97e-08	0	2.25e-08	1.99e-08	0	0	3.21e-07	2.27e-08	5.04e-08	1.01e-07	0	2.05e-08	2.53e-08	9.78e-08	0
s__Clostridiales_bacterium_KA00274	2.32e-06	2.49e-06	1.58e-06	3.39e-06	2.02e-06	4.38e-06	2.5e-06	4.08e-06	5.09e-06	1.66e-06	6.44e-06	5.01e-06	2.07e-06	5.13e-06	4.62e-06
s__Bordetella_pertussis	3.93e-06	5.93e-06	3.2e-06	4.25e-06	3.32e-06	5.16e-06	3.78e-06	3.42e-06	3.3e-06	4.35e-06	4.43e-06	3.74e-06	5.94e-06	4.74e-06	3.58e-06
s__Candidatus_Brocadia_fulgida	1.99e-06	5.32e-07	2.57e-06	2.45e-06	9.86e-07	4.49e-06	1.33e-06	3.18e-06	4.76e-06	1.48e-06	1.3e-06	4.5e-06	1.26e-06	1.88e-06	1.96e-06
s__Burkholderia_sp_TSV86	1.44e-06	3.23e-06	2.48e-06	3.01e-06	2.22e-06	2.12e-06	2.13e-06	1.13e-06	6.3e-07	2.44e-06	2.75e-06	1.73e-06	3.87e-06	2.22e-06	2.44e-06
s__Rhinocladiella_mackenziei	0	2.13e-08	0	1.4e-07	0	5.38e-08	0	0	0	0	0	0	0	2.44e-08	7.25e-08
s__Bacillus_xiamenensis	1.18e-07	1.06e-07	9.01e-08	1.8e-07	1.83e-07	3.23e-07	1.6e-07	3.4e-07	6.55e-07	1.51e-07	1.45e-07	2.67e-07	2.02e-07	5.38e-07	3.14e-07
s__Parcubacteria_group_bacterium_GW2011_GWE2_39_37	3.54e-07	5.74e-07	3.38e-07	2.59e-07	2.06e-07	1.34e-07	1.37e-07	2.04e-07	1.51e-07	2.27e-07	1.45e-07	2.67e-07	7.58e-08	1.47e-07	2.42e-07
s__Plasmodium_relictum	0	0	4.5e-08	0	0	0	0	0	0	0	0	0	0	0	0
s__Aureobasidium_pullulans	2.56e-07	1.91e-07	2.93e-07	5.98e-07	4.59e-08	2.69e-07	1.83e-07	2.04e-07	1.51e-07	2.01e-07	1.93e-07	6.16e-08	2.78e-07	1.71e-07	4.35e-07
s__Rheinheimera_perlucida	1.36e-06	4.17e-06	2e-06	3.57e-06	8.94e-07	2.34e-06	1.69e-06	1.43e-06	6.3e-07	1.59e-06	2.75e-06	1.97e-06	3.39e-06	1.96e-06	2.47e-06
s__Talaromyces_stipitatus	1.97e-08	4.25e-08	6.75e-08	0	2.29e-08	0	9.16e-08	4.08e-07	5.04e-08	1.01e-07	4.82e-08	6.16e-08	2.53e-08	4.89e-08	2.42e-08
s__Photobacterium_marinum	4.13e-07	3.62e-07	3.6e-07	3.59e-07	2.98e-07	1.34e-07	3.66e-07	1.81e-07	4.03e-07	2.52e-07	1.69e-07	2.47e-07	1.01e-07	2.2e-07	1.93e-07
s__Pseudomonas_migulae	0	0	0	1.99e-08	2.29e-08	0	4.58e-08	2.27e-08	5.04e-08	0	1.69e-07	0	1.01e-07	1.71e-07	0
s__Streptosporangium_amethystogenes	6.09e-07	3.4e-07	1.13e-07	4.99e-07	9.63e-07	9.14e-07	6.41e-07	1.59e-06	1.44e-06	3.52e-07	8.44e-07	1.77e-06	9.86e-07	1.03e-06	1.69e-06
s__Brevibacillus_borstelensis	5.21e-06	4.57e-06	3.92e-06	7.24e-06	5.64e-06	2.74e-06	4.88e-06	3.36e-06	4.84e-06	3.47e-06	9.74e-06	4.05e-06	3.06e-06	8.02e-06	4.11e-06
s__Bradyrhizobium_yuanmingense	7.86e-08	1.49e-07	1.58e-07	3.19e-07	1.1e-06	4.3e-07	9.16e-08	1.81e-07	3.78e-07	7.55e-08	3.13e-07	2.47e-07	1.77e-07	4.4e-07	1.69e-07
s__Streptomyces_sp_Root1295	0	0	0	0	0	0	0	0	2.52e-08	0	0	0	2.53e-08	0	0
s__Planctomycetes_bacterium_DG_23	3.15e-07	3.83e-07	4.05e-07	3.79e-07	5.04e-07	4.03e-07	4.58e-07	2.49e-07	3.02e-07	2.77e-07	4.82e-07	3.7e-07	2.27e-07	2.69e-07	3.87e-07
s__Pseudomonas_tremae	0	0	0	0	0	0	0	0	0	0	0	2.05e-08	0	4.89e-08	0
s__Lachnobacterium_bovis	4.62e-05	3.05e-05	3.15e-05	0.000103098	4.27e-05	3.73e-05	5.22e-05	4.18e-05	5.81e-05	2.7e-05	7.7e-05	4.35e-05	3.85e-05	9.69e-05	6.41e-05
s__Mycobacterium_genavense	1.97e-08	0	2.25e-08	1.99e-08	2.29e-08	0	2.29e-08	0	2.52e-08	0	2.41e-08	0	2.53e-08	2.44e-08	7.25e-08
s__Streptomyces_mutabilis	1.77e-07	3.19e-07	6.75e-08	2.39e-07	2.29e-08	2.96e-07	6.87e-08	3.4e-07	2.27e-07	3.78e-07	4.58e-07	0	7.33e-07	1.71e-07	3.38e-07
s__Streptomyces_sp_CNR698	1.97e-08	0	2.25e-08	1.99e-07	1.15e-07	0	1.14e-07	6.8e-08	7.56e-08	2.52e-08	4.82e-08	0	5.05e-08	4.89e-08	4.83e-08
s__Firmicutes_bacterium_ZOR0006	3.75e-06	2.57e-06	2.48e-06	3.25e-06	2.61e-06	4.97e-06	2.7e-06	3.11e-06	3.35e-06	2.67e-06	3.66e-06	2.55e-06	2.73e-06	4.01e-06	2.39e-06
s__Echinococcus_multilocularis	0	0	0	1.99e-08	0	0	2.29e-08	2.27e-08	2.52e-08	0	0	0	5.05e-08	4.89e-08	4.83e-08
s__Candidatus_Amesbacteria_bacterium_GW2011_GWA2_47_11b	3.54e-07	1.19e-06	9.68e-07	1.54e-06	1.15e-07	1.32e-06	5.95e-07	7.48e-07	4.54e-07	7.55e-07	6.03e-07	4.11e-07	2.07e-06	6.84e-07	1.23e-06
s__bacterium_SM23_31	1.18e-06	1.49e-06	1.53e-06	1.97e-06	1.05e-06	1.59e-06	1.21e-06	1.13e-06	7.56e-07	1.64e-06	1.35e-06	1.56e-06	2.5e-06	8.56e-07	1.33e-06
s__Perca_flavescens	0	0	0	0	0	0	0	2.27e-08	0	0	0	4.11e-08	0	0	0
s__Rickettsiella_melolonthae	0	0	0	0	0	0	0	0	0	0	0	2.05e-08	0	0	0
s__Streptomyces_sp_MUSC_125	1.97e-08	4.25e-08	6.75e-08	5.98e-08	6.88e-08	0	2.29e-08	2.27e-08	7.56e-08	2.01e-07	9.64e-08	1.03e-07	7.58e-08	1.96e-07	1.21e-07
s__Fusarium_oxysporum	2.75e-07	7.66e-07	3.83e-07	5.39e-07	3.67e-07	5.11e-07	4.12e-07	2.04e-07	7.56e-08	5.03e-07	5.3e-07	1.23e-07	7.33e-07	7.09e-07	6.04e-07
s__Luteibacter_sp_9143	0	0	0	0	0	0	0	0	0	0	0	0	0	0	0
s__Micromonospora_carbonacea	5.31e-07	3.19e-07	7.2e-07	6.98e-07	5.96e-07	8.33e-07	9.62e-07	7.48e-07	1.13e-06	8.05e-07	6.99e-07	9.24e-07	4.8e-07	7.09e-07	7.73e-07
s__Candidatus_Walczuchella_monophlebidarum	1.57e-07	5.32e-07	4.28e-07	3.79e-07	1.83e-07	3.49e-07	2.98e-07	4.76e-07	1.01e-07	2.77e-07	3.37e-07	2.67e-07	2.78e-07	1.47e-07	4.11e-07
s__Thermococcus_litoralis	1.18e-07	1.91e-07	1.13e-07	2.59e-07	1.15e-07	1.61e-07	1.14e-07	6.58e-07	1.51e-07	1.76e-07	4.82e-08	2.88e-07	5.05e-08	7.33e-08	3.63e-07
s__Leptothrix_cholodnii	1.38e-06	2.04e-06	1.24e-06	2.03e-06	1.28e-06	1.61e-06	2.15e-06	6.8e-07	7.31e-07	1.61e-06	1.18e-06	1.15e-06	2.27e-06	8.56e-07	1.81e-06
s__Streptomyces_hirsutus	5.9e-07	1.06e-07	4.95e-07	1.2e-07	5.04e-07	1.08e-07	1.01e-06	9.07e-08	1.76e-07	3.02e-07	9.64e-08	4.11e-08	2.53e-08	2.93e-07	1.45e-07
s__Halanaerobium_praevalens	3.66e-06	1.74e-06	2.86e-06	4.39e-06	5.18e-06	1.85e-06	4.35e-06	2.97e-06	3.02e-06	1.64e-06	3.04e-06	3.33e-06	2.43e-06	2.91e-06	3.48e-06
s__Microcystis_sp_T1-4	6.68e-07	1.55e-06	1.1e-06	1.46e-06	3.44e-07	1.37e-06	1.53e-06	8.62e-07	3.02e-07	1.33e-06	1.28e-06	9.04e-07	1.97e-06	1.08e-06	1.11e-06
s__bacteria_symbiont_BFo1_of_Frankliniella_occidentalis	2.56e-07	2.13e-07	6.75e-08	3.99e-08	2.98e-07	8.06e-08	5.95e-07	2.72e-07	4.54e-07	1.76e-07	7.23e-08	6.16e-08	2.53e-07	3.91e-07	2.42e-07
s__Pseudomonas_sp_GM79	1.38e-07	0	2.25e-08	0	2.29e-08	0	2.29e-08	0	0	0	0	2.05e-08	0	0	0
s__Ruminococcus_sp_CAG724	3.17e-05	1.8e-05	2.53e-05	3.26e-05	1.59e-05	1.46e-05	1.81e-05	2.35e-05	2.62e-05	1.31e-05	2.8e-05	2.39e-05	1.8e-05	3.01e-05	2e-05
s__Prevotella_sp_109	0.000356323	0.000463803	0.00050663	0.000298264	0.000357287	0.000431477	0.000434319	0.000450204	0.000392039	0.000459716	0.000310439	0.000444759	0.000384149	0.000260894	0.000363028
s__uncultured_marine_thaumarchaeote_SAT1000_48_A08	0	0	0	0	0	0	0	0	0	0	0	0	0	0	0
s__Flavihumibacter_petaseus	2.92e-05	2.61e-05	3.06e-05	1.9e-05	2.08e-05	2.64e-05	2.46e-05	2.58e-05	2.78e-05	2.36e-05	1.77e-05	2.96e-05	2.81e-05	1.39e-05	2e-05
s__Bdellovibrio_bacteriovorus	7.41e-06	4.49e-06	8.94e-06	6.1e-06	6.67e-06	4.22e-06	5.34e-06	4.35e-06	4.74e-06	6.39e-06	5.16e-06	4.23e-06	6.22e-06	4.47e-06	4.28e-06
s__Cucumis_melo	1.97e-07	3.62e-07	9.01e-08	2.39e-07	1.15e-07	5.38e-08	4.58e-08	1.59e-07	5.04e-08	7.55e-08	4.1e-07	1.03e-07	2.53e-08	2.2e-07	0
s__Oceanobacillus_oncorhynchi	5.39e-06	2.32e-06	3.65e-06	3.31e-06	3.55e-06	4.06e-06	2.63e-06	3.38e-06	4.21e-06	4.03e-06	3.57e-06	3.31e-06	3.82e-06	5.01e-06	3.79e-06
s__Microbacterium_sp_Ag1	0	6.38e-08	0	1.99e-08	0	2.69e-08	6.87e-08	6.8e-08	5.04e-08	0	4.82e-08	4.11e-08	5.05e-08	4.89e-08	2.42e-08
s__Streptococcus_sp_F0441	3.54e-07	1.15e-06	3.83e-07	8.58e-07	6.88e-08	1.02e-06	6.64e-07	5.67e-07	1.51e-07	3.52e-07	1.06e-06	3.29e-07	1.14e-06	7.09e-07	1.06e-06
s__Thioclava_indica	9.24e-07	3.62e-07	1.04e-06	4.99e-07	7.34e-07	3.76e-07	2.29e-07	9.53e-07	1.06e-06	8.81e-07	2.89e-07	8.42e-07	4.3e-07	3.18e-07	7.25e-07
s__unidentified_prokaryotic_organism	0	0	0	0	0	0	2.29e-08	0	1.01e-07	0	0	0	0	2.44e-08	0
s__Chelativorans_sp_J32	4.52e-07	3.4e-07	3.38e-07	2.19e-07	1.83e-07	3.23e-07	5.5e-07	2.72e-07	4.28e-07	4.03e-07	3.62e-07	1.44e-07	2.78e-07	2.69e-07	1.93e-07
s__Arthrobacter_sp_Soil736	1.97e-07	1.06e-07	6.75e-08	7.98e-08	1.83e-07	1.08e-07	4.35e-07	4.54e-08	1.01e-07	5.03e-08	0	1.03e-07	1.01e-07	2.69e-07	1.69e-07
s__Sawyeria_marylandensis	0	0	0	0	0	0	0	2.27e-08	0	0	0	4.11e-08	0	0	0
s__Thermococcus_thioreducens	0	1.28e-07	0	1.2e-07	1.61e-07	0	4.58e-08	0	5.04e-08	7.55e-08	4.82e-08	0	2.53e-08	9.78e-08	0
s__Mycoplasma_zalophi	0	0	0	0	0	0	0	0	0	0	0	0	0	0	0
s__Sulfurihydrogenibium_sp_YO3AOP1	1e-06	6.81e-07	7.66e-07	1.72e-06	9.4e-07	1.24e-06	1.17e-06	1.97e-06	1.71e-06	8.05e-07	1.23e-06	1.99e-06	1.01e-06	1.17e-06	1.62e-06
s__Fonsecaea_nubica	5.9e-08	0	0	0	0	0	2.29e-08	2.27e-08	0	0	0	0	0	0	2.42e-08
s__Borrelia_persica	7.86e-08	6.38e-08	1.13e-07	3.99e-08	6.88e-08	1.08e-07	0	2.27e-08	0	7.55e-08	0	2.05e-08	0	7.33e-08	2.42e-08
s__Prochlorococcus_sp_scB245a_519L21	0	0	0	0	4.59e-08	0	0	0	0	0	0	0	0	7.33e-08	0
s__Oxalis_triangularis_subsp_papilionacea	1.97e-08	0	0	0	4.59e-08	0	0	0	0	0	2.41e-08	0	0	0	0
s__Bradyrhizobium_sp_CCBAU_41134	0	0	0	0	0	0	2.29e-08	0	0	0	0	0	0	0	0
s__Viridibacillus_arvi	3.34e-07	5.53e-07	2.25e-07	1.22e-06	5.04e-07	5.38e-07	4.12e-07	1.52e-06	6.05e-07	3.02e-07	1.18e-06	3.7e-07	7.58e-07	1.22e-06	6.28e-07
s__Tessaracoccus_massiliensis	3.93e-07	5.32e-07	2.25e-07	3.99e-07	2.98e-07	3.76e-07	3.21e-07	2.49e-07	2.77e-07	7.55e-08	2.89e-07	3.49e-07	3.54e-07	1.71e-07	2.42e-07
s__uncultured_Rhizobiales_bacterium_HF4000_32B18	2.36e-07	2.13e-07	2.48e-07	1.22e-06	6.42e-07	5.64e-07	2.06e-07	4.08e-07	4.79e-07	2.27e-07	1.69e-07	3.9e-07	1.26e-07	8.31e-07	9.67e-08
s__Granulicoccus_phenolivorans	2.75e-07	2.98e-07	5.63e-07	2.99e-07	5.04e-07	3.76e-07	5.95e-07	3.08e-06	2.27e-07	3.02e-07	6.03e-07	2.05e-07	5.05e-07	4.4e-07	4.35e-07
s__Clostridiales_bacterium_VE202-21	1.68e-05	1.68e-05	1.36e-05	7.48e-05	2.27e-05	1.41e-05	3.2e-05	2.68e-05	2.48e-05	2.08e-05	4.08e-05	2.96e-05	3e-05	5.94e-05	5.23e-05
s__Drosophila_kikkawai	1.57e-07	0	6.75e-08	0	6.88e-08	0	6.87e-08	4.54e-08	0	0	0	0	0	0	2.42e-08
s__Piromyces_rhizinflatus	0	0	0	0	0	0	2.29e-08	0	0	0	1.93e-07	0	1.26e-07	0	0
s__Fonsecaea_multimorphosa	0	0	4.5e-08	0	0	0	0	0	0	0	4.82e-08	0	0	4.89e-08	0
s__uncultured_bacterium_DCM008Kan01	0	0	0	0	0	0	0	0	0	0	0	0	0	0	0
s__Rikenella_microfusus	0.0004442	0.00043241	0.000679522	0.000298782	0.00266146	0.00061039	0.000552729	0.00031813	0.000326476	0.000855656	0.00027631	0.000499427	0.000379171	0.000856503	0.000278821
s__uncultured_bacterium_Contigcl_1829	0	0	0	1.99e-08	0	0	0	0	0	0	0	0	0	0	0
s__Hymenobacter_sp_PAMC_26628	1.16e-05	1.3e-05	1.12e-05	1.05e-05	8.64e-06	9.97e-06	1.04e-05	1.1e-05	9.68e-06	1.43e-05	1.01e-05	9.2e-06	1.39e-05	7.65e-06	1.04e-05
s__Candidatus_Collierbacteria_bacterium_GW2011_GWB2_45_17	3.93e-08	0	0	1.99e-08	0	2.69e-08	4.58e-08	0	0	5.03e-08	0	4.11e-08	0	2.44e-08	0
s__Janibacter_melonis	1.77e-07	2.13e-08	9.01e-08	1.2e-07	1.38e-07	4.57e-07	9.16e-08	5.44e-07	2.52e-07	5.03e-08	3.13e-07	3.7e-07	3.29e-07	5.87e-07	3.87e-07
s__Sphingomonas_sp_Ag1	6.68e-07	3.4e-07	5.63e-07	2.39e-07	9.86e-07	9.41e-07	5.27e-07	4.99e-07	7.81e-07	3.02e-07	1.16e-06	9.45e-07	2.53e-08	2.2e-07	1.93e-07
s__Allofustis_seminis	5.03e-06	2.49e-06	3.24e-06	5.39e-06	4.06e-06	3.17e-06	2.5e-06	4.24e-06	4.69e-06	1.96e-06	5.54e-06	3.33e-06	2.22e-06	4.94e-06	3.34e-06
s__Hoeflea_sp_BRH_c9	2.36e-07	6.81e-07	1.58e-07	9.37e-07	4.59e-08	6.45e-07	6.87e-07	6.35e-07	5.04e-07	5.03e-07	3.13e-07	3.29e-07	3.54e-07	7.82e-07	1.16e-06
s__Escherichia_coli_O157_typing_phage_3	0	0	0	0	0	0	0	0	2.52e-08	0	0	2.05e-08	0	0	2.42e-08
s__Corynebacterium_lowii	9.83e-08	2.13e-07	1.35e-07	2.59e-07	1.83e-07	1.88e-07	4.12e-07	2.27e-07	1.26e-07	0	1.93e-07	1.64e-07	2.78e-07	4.64e-07	5.08e-07
s__Mycoplasma_pulmonis	8.45e-07	3.15e-06	1.13e-07	1.99e-07	8.71e-07	2.69e-08	1.01e-06	3.52e-06	7.56e-08	1.16e-06	2.41e-07	3.49e-07	0	1.47e-07	0
s__Streptomyces_sp_CNH189	7.86e-08	2.13e-08	2.25e-08	0	1.61e-07	5.38e-08	4.58e-08	4.54e-08	2.52e-08	1.26e-07	1.45e-07	2.05e-08	0	9.78e-08	2.42e-08
s__Anoxybacillus_suryakundensis	5.9e-07	2.55e-07	3.38e-07	3.79e-07	4.13e-07	4.3e-07	4.35e-07	7.03e-07	3.02e-07	2.27e-07	3.86e-07	1.23e-07	7.58e-08	8.56e-07	3.14e-07
s__Thraustotheca_clavata	1.97e-08	0	0	0	0	0	0	0	0	0	0	0	0	7.33e-08	0
s__Clavibacter_michiganensis_subsp_capsici	0	0	4.5e-08	3.99e-08	0	0	4.58e-08	4.54e-08	2.52e-08	0	2.41e-08	0	5.05e-08	2.44e-08	0
s__Bradyrhizobium_pachyrhizi	7.47e-07	3.83e-07	9.23e-07	7.98e-07	3.21e-07	1.61e-07	3.89e-07	3.4e-07	1.29e-06	8.05e-07	6.51e-07	1.13e-06	6.06e-07	8.8e-07	5.32e-07
s__Tetrasphaera_australiensis	3.54e-07	1.13e-06	1.8e-07	7.18e-07	1.15e-07	1.08e-06	9.16e-08	4.99e-07	3.53e-07	1.28e-06	1.01e-06	3.08e-07	1.24e-06	6.36e-07	7.25e-07
s__Sphingobacterium_sp_ML3W	1.69e-05	3.41e-05	2.17e-05	2.7e-05	1.58e-05	2.79e-05	2.51e-05	2.1e-05	1.41e-05	2.44e-05	2.09e-05	1.76e-05	3.58e-05	1.54e-05	2.67e-05
s__Thalassiosira_pseudonana	7.67e-07	1.85e-06	1.01e-06	1.83e-06	2.29e-08	1.67e-06	5.72e-07	7.03e-07	2.02e-07	1.31e-06	1.06e-06	6.16e-07	2.58e-06	8.07e-07	1.45e-06
s__Aequorivita_sublithincola	6.21e-06	9.12e-06	9.86e-06	8.16e-06	3.83e-06	1e-05	7.33e-06	5.74e-06	5.74e-06	1.05e-05	7.21e-06	7.6e-06	1.21e-05	5.43e-06	7.98e-06
s__Campylobacter_corcagiensis	1.34e-06	6.38e-07	1.04e-06	1.02e-06	1.19e-06	1.26e-06	9.62e-07	1.07e-06	1.66e-06	8.56e-07	1.69e-06	1.27e-06	1.16e-06	1.52e-06	1.02e-06
s__Escherichia_virus_C40	0	0	0	3.99e-08	0	0	0	0	0	0	0	0	5.05e-08	0	0
s__Streptomyces_sp_XY332	1.97e-08	8.51e-08	0	0	0	0	0	2.27e-08	0	0	0	4.11e-08	7.58e-08	1.22e-07	0
s__Streptomyces_sp_NRRL_B-24484	9.83e-08	1.28e-07	1.35e-07	1.4e-07	2.75e-07	1.08e-07	1.37e-07	1.13e-07	1.76e-07	2.01e-07	2.41e-07	2.26e-07	5.81e-07	2.44e-07	1.93e-07
s__candidate_divison_MSBL1_archaeon_SCGC-AAA259A05	0	2.13e-08	4.5e-08	3.99e-08	4.59e-08	5.38e-08	4.58e-08	0	2.52e-08	0	7.23e-08	8.22e-08	0	2.2e-07	1.45e-07
s__Gordonia_phage_Vivi2	0	0	0	0	2.29e-08	0	0	0	0	0	0	0	2.53e-08	0	0
s__Desulfococcus_oleovorans	3.99e-06	3.64e-06	4.48e-06	3.63e-06	2.98e-06	6.5e-06	3.62e-06	4.63e-06	6.4e-06	2.97e-06	2.51e-06	6.72e-06	3.66e-06	3.06e-06	2.56e-06
s__Bacteroides_faecis_CAG32	8.65e-05	0.000133439	0.000103996	8.51e-05	7.62e-05	0.000115503	8.45e-05	7.68e-05	6.38e-05	8.79e-05	7.58e-05	8.35e-05	0.000113612	5.06e-05	7.76e-05
s__uncultured_archaeon_W4-93a	0	0	0	0	0	0	0	0	0	0	0	2.05e-08	0	0	0
s__Triticum_turgidum_subsp_durum	3.15e-07	0	0	0	0	5.38e-08	0	0	0	0	7.23e-08	4.11e-08	2.53e-08	0	4.83e-08
s__Meiothermus_taiwanensis	1.97e-08	2.13e-08	0	7.98e-08	9.17e-08	8.06e-08	2.29e-08	2.27e-08	1.51e-07	0	1.69e-07	2.05e-08	0	5.38e-07	2.42e-08
s__Pseudomonas_taiwanensis	0	0	4.5e-08	0	0	0	6.87e-08	2.27e-08	0	5.03e-08	2.41e-08	2.05e-08	2.53e-08	2.44e-08	7.25e-08
s__Rickettsia_asembonensis	7.86e-08	6.38e-08	0	1.99e-08	6.88e-08	5.38e-08	4.58e-08	2.27e-08	0	5.03e-08	2.41e-08	1.44e-07	5.05e-08	4.89e-08	4.83e-08
s__Thermanaerothrix_daxensis	8.06e-07	8.08e-07	1.37e-06	1.36e-06	7.11e-07	1.34e-06	9.39e-07	1.77e-06	1.29e-06	7.8e-07	1.13e-06	7.4e-07	5.31e-07	1.61e-06	8.22e-07
s__Lactobacillus_namurensis	9.24e-07	9.78e-07	1.96e-06	1.32e-06	2.32e-06	9.95e-07	9.16e-07	8.39e-07	1.54e-06	1.28e-06	1.78e-06	8.22e-07	1.57e-06	2.03e-06	1.14e-06
s__Enterobacter_sp_MGH_3	0	0	0	5.98e-08	0	0	0	0	0	0	5.3e-07	0	0	0	0
s__Bartonella_grahamii	2.16e-07	1.7e-07	1.35e-07	2.39e-07	2.06e-07	6.99e-07	2.29e-07	2.27e-08	3.53e-07	1.26e-07	3.62e-07	2.47e-07	3.79e-07	1.71e-07	2.42e-07
s__Candidatus_Caldiarchaeum_subterraneum	1.97e-07	2.55e-07	4.5e-08	2.59e-07	0	1.88e-07	9.16e-08	2.49e-07	2.27e-07	2.52e-07	2.41e-07	1.03e-07	3.79e-07	2.2e-07	1.69e-07
s__Curvibacter_gracilis	8.45e-07	6.38e-07	8.33e-07	7.98e-07	6.65e-07	9.14e-07	5.95e-07	3.63e-07	9.32e-07	5.54e-07	8.44e-07	8.42e-07	7.83e-07	7.82e-07	6.04e-07
s__Mycolicibacterium_vaccae	3.34e-07	5.96e-07	1.8e-07	6.58e-07	1.61e-07	6.45e-07	9.16e-08	4.08e-07	7.56e-08	3.52e-07	4.82e-07	2.88e-07	5.05e-07	2.69e-07	5.32e-07
s__uncultured_Fervidobacterium_sp	0	6.38e-08	4.5e-08	0	0	2.69e-08	0	4.54e-08	0	0	0	4.11e-08	0	0	2.42e-08
s__Acetobacter_senegalensis	6.88e-07	2e-06	1.06e-06	1.28e-06	2.06e-07	1.24e-06	5.5e-07	6.12e-07	5.29e-07	1.51e-06	9.64e-07	1.03e-06	2.3e-06	1.12e-06	1.35e-06
s__Candidatus_Curtissbacteria_bacterium_GW2011_GWA1_40_9	1.97e-08	0	0	0	0	8.06e-08	2.29e-08	0	0	5.03e-08	7.23e-08	2.05e-08	0	4.89e-08	0
s__Gentiana_scabra_x_Gentiana_triflora	0	0	0	0	0	0	0	0	0	0	0	0	0	0	0
s__Melomys_burtoni_retrovirus	0	0	0	0	0	0	0	0	0	2.52e-08	0	0	0	0	0
s__Candidatus_Woesebacteria_bacterium_GW2011_GWB1_44_11	0	0	6.75e-08	1.99e-08	0	2.96e-07	0	0	1.01e-07	0	0	0	0	0	0
s__Streptomyces_reticuli	1.57e-07	1.06e-07	6.75e-08	3.99e-08	0	1.61e-07	2.52e-07	6.12e-07	2.02e-07	5.03e-08	7.23e-08	5.14e-07	5.05e-08	1.47e-07	1.93e-07
s__Acinetobacter_guillouiae	2.44e-06	5.91e-06	3.92e-06	5.86e-06	1.56e-06	6.85e-06	2.63e-06	2.65e-06	1.23e-06	4.58e-06	5.76e-06	2.71e-06	1.06e-05	3.94e-06	4.83e-06
s__Paenibacillus_borealis	6.57e-06	9.91e-06	5.63e-06	1.35e-05	4.75e-06	1.02e-05	6e-06	7.64e-06	6.98e-06	6.07e-06	1.32e-05	7.79e-06	1.24e-05	1.14e-05	1.22e-05
s__Dehalococcoides_sp_UCH007	1.97e-08	0	0	1.99e-08	0	0	2.29e-08	0	2.52e-08	0	1.45e-07	0	0	1.47e-07	0
s__Chrysobalanus_icaco	0	0	0	0	0	0	0	0	0	0	0	0	2.53e-08	0	0
s__Bacillus_phage_Eldridge	0	0	0	5.98e-08	0	0	0	2.27e-08	2.52e-08	0	2.41e-08	0	0	0	4.83e-08
s__Psychrobacter_sp_JCM_18903	1.38e-06	1.7e-07	1.17e-06	4.79e-06	5.87e-06	2.42e-07	3.66e-07	3.18e-07	2.02e-07	2.52e-08	1.93e-07	1.85e-07	2.53e-08	1.22e-07	6.28e-07
s__Argulus_sp_Arg2	0	0	0	1.99e-08	0	0	0	0	0	0	4.82e-08	0	0	0	0
s__gamma_proteobacterium_HdN1	1.73e-06	5.64e-06	3.33e-06	4.13e-06	5.73e-07	4.73e-06	2.86e-06	2.9e-06	1.94e-06	4.45e-06	4.27e-06	2.14e-06	6.82e-06	4.77e-06	5.03e-06
s__Flammeovirga_yaeyamensis	4.27e-06	9.85e-06	4.55e-06	3.07e-06	2.43e-06	4.87e-06	3.6e-06	2.79e-06	2.65e-06	4.56e-06	3.23e-06	3.37e-06	4.52e-06	2.59e-06	2.18e-06
s__Thermus_sp_29	9.83e-08	1.06e-07	1.8e-07	1.8e-07	2.98e-07	8.06e-08	4.81e-07	0	1.01e-07	1.76e-07	9.64e-08	8.22e-08	1.26e-07	2.2e-07	1.45e-07
s__uncultured_thaumarchaeote	0	2.13e-08	2.25e-08	0	0	5.38e-08	0	2.27e-08	0	0	2.41e-08	0	2.53e-08	0	4.83e-08
s__Chloroflexus_aggregans	1.91e-06	1.02e-06	1.64e-06	2.29e-06	2.25e-06	1.56e-06	3.09e-06	1.34e-06	1.71e-06	1.48e-06	1.81e-06	1.25e-06	1.19e-06	1.64e-06	1.23e-06
s__Haladaptatus_cibarius	5.9e-08	6.38e-08	2.25e-08	3.99e-08	6.88e-08	5.38e-08	0	1.13e-07	7.56e-08	2.52e-08	4.82e-08	1.03e-07	2.53e-08	7.33e-08	7.25e-08
s__Curtobacterium_sp_UNCCL17	1.97e-08	0	2.25e-08	9.97e-08	0	2.69e-08	0	0	0	2.52e-08	4.82e-08	2.05e-08	0	7.33e-08	0
s__Mycoplasma_haemofelis	1.97e-08	0	4.5e-08	0	2.29e-08	5.38e-08	6.87e-08	1.81e-07	5.04e-08	0	0	8.22e-08	0	7.33e-08	2.42e-08
s__Bacteroides_sp_4_3_47FAA	9.83e-05	0.000128037	0.000131847	0.000117578	7.98e-05	9.2e-05	9.64e-05	0.000106852	0.000113688	0.000129866	6.29e-05	0.000106829	8.69e-05	6.35e-05	7.8e-05
s__Moorella_mulderi	2.01e-06	5e-06	2.39e-06	4.79e-06	1.47e-06	3.98e-06	2.79e-06	1.77e-06	2.07e-06	2.77e-06	4.15e-06	2.26e-06	5.16e-06	3.59e-06	4.98e-06
s__Micromonospora_sp_RV43	1.97e-08	0	0	1.99e-08	2.29e-08	0	2.29e-08	2.27e-08	2.52e-08	0	0	0	0	2.44e-08	0
s__Bacillus_virus_Slash	9.83e-08	0	0	0	1.61e-07	5.38e-08	1.37e-07	0	0	7.55e-08	0	0	1.01e-07	0	0
s__Paenibacillus_pasadenensis	3.5e-06	3.32e-06	2.43e-06	6.8e-06	6.6e-06	3.47e-06	3.73e-06	4.17e-06	4.23e-06	2.42e-06	5.23e-06	4.58e-06	2.86e-06	6.14e-06	5.1e-06
s__Rubeoparvulum_massiliense	3.5e-06	3.21e-06	3.24e-06	5.25e-06	2.55e-06	3.12e-06	2.7e-06	3.79e-06	4.01e-06	2.89e-06	4.63e-06	3.37e-06	2.86e-06	4.3e-06	4.52e-06
s__Pongo_abelii	1.77e-07	0	4.5e-08	5.98e-08	2.29e-08	0	1.83e-07	0	0	0	1.21e-07	0	2.53e-08	7.33e-08	7.25e-08
s__Jiulongibacter_sediminis	2.32e-05	2.6e-05	2.36e-05	2.23e-05	1.65e-05	3.13e-05	1.91e-05	2.68e-05	2.27e-05	2.61e-05	2.3e-05	2.39e-05	3.41e-05	1.85e-05	2.95e-05
s__uncultured_bacterium_Contig90	1.18e-07	6.38e-08	2.25e-07	3.39e-07	1.83e-07	2.69e-07	2.75e-07	4.54e-07	3.02e-07	5.03e-08	6.27e-07	5.34e-07	2.53e-07	1.05e-06	2.42e-07
s__Bacteroides_stercoris_CAG120	5.58e-05	8.45e-05	5.11e-05	6.69e-05	3.96e-05	0.000105369	5.72e-05	8.37e-05	7.01e-05	6.2e-05	6.24e-05	8.7e-05	0.000107674	5.78e-05	9.35e-05
s__Ithone_fulva	0	0	0	0	0	0	2.29e-08	0	0	0	0	0	0	0	0
s__Xylella_fastidiosa_subsp_multiplex	0	0	2.25e-08	0	4.59e-08	0	0	0	0	0	0	0	0	0	0
s__marine_actinobacterium_MedAcidi-G1	5.9e-07	2.76e-07	9.68e-07	5.78e-07	2.75e-07	1.88e-07	1.81e-06	4.08e-07	7.81e-07	2.27e-07	3.13e-07	4.93e-07	7.33e-07	6.36e-07	4.83e-08
s__Paenibacillus_harenae	4.38e-06	3.57e-06	2.66e-06	9.19e-06	5.6e-06	3.47e-06	6.46e-06	4.81e-06	5.34e-06	3.62e-06	1.02e-05	5.83e-06	4.55e-06	7.9e-06	7.28e-06
s__Pseudoalteromonas_sp_10-33	2.75e-07	1.06e-07	2.25e-08	5.98e-08	1.38e-07	1.08e-07	1.37e-07	2.72e-07	2.02e-07	2.52e-07	2.41e-07	1.23e-07	1.01e-07	4.89e-08	7.25e-08
s__Ampelocalamus_calcareus	0	0	0	0	0	0	0	0	0	0	0	0	0	0	0
s__Frigoribacterium_sp_Leaf263	1.97e-08	0	0	1.99e-08	0	0	2.29e-08	0	0	0	2.41e-08	4.11e-08	2.53e-08	0	2.42e-08
s__Streptomyces_torulosus	0	0	0	0	0	0	2.29e-08	0	0	0	0	0	2.53e-08	4.89e-08	0
s__Agromyces_sp_Root1464	5.31e-07	1.06e-07	5.85e-07	2.59e-07	5.27e-07	2.42e-07	1.05e-06	4.31e-07	4.03e-07	4.28e-07	2.89e-07	4.93e-07	1.52e-07	2.44e-08	5.08e-07
s__Lampropedia_cohaerens	3.74e-07	7.02e-07	1.8e-07	6.18e-07	5.73e-07	6.72e-07	2.98e-07	3.63e-07	5.8e-07	6.04e-07	1.93e-07	6.98e-07	4.04e-07	3.18e-07	9.91e-07
s__Rhodococcus_sp_R04	1.97e-07	8.51e-08	1.13e-07	9.97e-08	1.15e-07	4.84e-07	1.14e-07	6.8e-07	7.81e-07	1.51e-07	9.64e-08	7.4e-07	5.05e-08	1.47e-07	1.21e-07
s__Lysinibacillus_sp_F5	9.63e-07	4.68e-07	6.3e-07	1.1e-06	3.21e-07	1.24e-06	8.7e-07	1.72e-06	1.23e-06	6.04e-07	1.23e-06	6.37e-07	3.03e-07	1.27e-06	8.46e-07
s__Mycobacterium_virus_Alma	0	0	0	0	0	0	0	0	0	0	0	2.05e-08	2.53e-08	0	0
s__uncultured_marine_group_II_euryarchaeote	4.72e-07	1.49e-07	5.18e-07	3.59e-07	2.06e-07	8.06e-08	2.75e-07	3.63e-07	3.02e-07	3.52e-07	1.93e-07	8.22e-08	1.01e-07	1.71e-07	1.21e-07
s__Veillonella_sp_ICM51a	3.34e-07	1.7e-07	0	1.14e-06	2.75e-07	1.34e-07	2.75e-07	2.49e-07	3.78e-07	3.27e-07	2.89e-07	3.9e-07	1.52e-07	4.89e-07	5.08e-07
s__Rhizosolenia_imbricata	0	0	2.25e-08	0	4.59e-08	0	0	0	2.52e-08	0	0	0	0	0	0
s__Caballeronia_glathei	1.55e-06	1.49e-06	9.91e-07	8.78e-07	7.57e-07	1.77e-06	5.95e-07	1.97e-06	1.54e-06	1.56e-06	1.18e-06	2.05e-06	2.05e-06	1.83e-06	2.51e-06
s__Candidatus_Regiella_insecticola	4.33e-07	3.4e-07	5.63e-07	8.78e-07	5.5e-07	2.15e-07	5.5e-07	3.63e-07	2.22e-06	3.02e-07	1.4e-06	4.52e-07	6.06e-07	1.1e-06	2.63e-06
s__Burkholderia_sp_MSMB1826	3.93e-08	0	0	0	9.17e-08	0	0	0	0	0	4.82e-08	4.11e-08	0	4.89e-08	2.42e-08
s__Ictidomys_tridecemlineatus	3.93e-08	0	2.25e-08	0	0	2.69e-08	6.87e-08	2.72e-07	0	0	2.41e-08	2.05e-08	2.53e-08	2.44e-08	4.83e-08
s__Citrobacter_rodentium	9.83e-08	1.7e-07	9.01e-08	2.99e-07	3.21e-07	1.61e-07	2.29e-07	1.13e-07	2.77e-07	7.55e-08	3.62e-07	1.23e-07	7.58e-08	1.96e-07	2.18e-07
s__Devosia_limi	3.15e-07	3.83e-07	1.35e-07	3.19e-07	3.21e-07	2.15e-07	2.52e-07	2.04e-07	5.04e-08	2.01e-07	1.69e-07	2.67e-07	1.52e-07	8.07e-07	9.67e-08
s__Staphylococcus_vitulinus	1.57e-06	1.91e-07	3.96e-06	3.59e-07	2.13e-06	2.42e-07	6.41e-07	4.54e-07	5.54e-07	3.02e-07	7.23e-08	3.7e-07	3.29e-07	4.64e-07	5.08e-07
s__Candidatus_Saccharibacteria_bacterium_GW2011_GWC2_48_9	9.01e-05	1.7e-07	9.69e-05	2.78e-05	6.79e-05	3.98e-05	0.000193379	2.35e-05	5.66e-05	5.28e-05	2.69e-05	4.13e-05	3.74e-05	5.95e-05	1.42e-05
s__Prevotella_sp_10H	0.000253545	0.000304693	0.000264325	0.000228056	0.000229516	0.000271111	0.000242245	0.000258387	0.00023224	0.00026688	0.000203304	0.000232724	0.000304272	0.000170377	0.000242639
s__Eikenella_sp_NML96-A-049	0	0	0	0	0	0	0	9.07e-08	0	0	0	0	0	0	0
s__Capnocytophaga_sp_oral_taxon_326	5.93e-05	3.62e-05	5.28e-05	3.56e-05	3.16e-05	4.62e-05	0.000148544	4.82e-05	4.94e-05	5.09e-05	3.4e-05	4.44e-05	4.3e-05	3.58e-05	4.58e-05
s__Psychrobacter_sp_TB2	0	0	0	0	4.59e-08	0	0	0	0	0	0	0	0	0	0
s__Bacillus_aerophilus	1.38e-07	2.13e-08	9.01e-08	5.98e-08	3.21e-07	2.69e-08	2.06e-07	6.8e-08	2.52e-07	0	2.65e-07	4.11e-08	0	9.78e-08	7.25e-08
s__Candidatus_Aschnera_chinzeii	0	0	0	3.99e-08	0	0	0	0	0	0	0	0	0	0	0
s__Prevotella_bryantii	0.000761912	0.000998621	0.000977575	0.000733433	0.000697674	0.000880049	0.000804454	0.000843592	0.000697325	0.000894314	0.000680411	0.000788729	0.000924464	0.000578254	0.000762285
s__Flavobacterium_gelidilacus	9.67e-06	4.83e-06	6.19e-06	4.63e-06	7.18e-06	9.35e-06	8.06e-06	9.93e-06	1.03e-05	7.02e-06	4.87e-06	1.07e-05	8.16e-06	5.52e-06	7.95e-06
s__Paenibacillus_massiliensis	3.28e-06	4.13e-06	2.48e-06	7.98e-06	5.57e-06	3.58e-06	5.2e-06	4.99e-06	6.68e-06	3.45e-06	6.1e-06	4.29e-06	4.32e-06	1.08e-05	6.43e-06
s__Roseburia_sp_CAG471	2.4e-05	1.6e-05	1.41e-05	6.18e-05	2.8e-05	1.55e-05	3.34e-05	1.83e-05	3.21e-05	1.55e-05	5.09e-05	2.5e-05	2.05e-05	6.87e-05	4.37e-05
s__uncultured_Cronobacter_sp	0	2.13e-08	0	0	0	0	0	0	0	0	0	0	0	0	0
s__Chloreuptychia_herseis	0	0	0	0	0	0	0	0	0	2.52e-08	0	0	0	0	0
s__Chryseobacterium_palustre	5.11e-06	6.81e-06	5.11e-06	5.11e-06	7.66e-06	4.44e-06	4.85e-06	4.51e-06	3.78e-06	5.59e-06	3.95e-06	3.74e-06	6.06e-06	2.91e-06	3.67e-06
s__Streptococcus_sp_CCH5-D3	3.93e-08	0	0	0	0	0	4.58e-08	2.27e-08	2.52e-08	7.55e-08	0	0	2.53e-08	2.44e-08	2.42e-08
s__Mycolicibacterium_mageritense	1.18e-07	1.91e-07	3.38e-07	2.59e-07	6.88e-08	1.61e-07	3.89e-07	1.36e-07	3.28e-07	2.52e-07	1.45e-07	1.85e-07	3.79e-07	1.22e-07	2.18e-07
s__Campylobacter_lari_subsp_concheus	0	0	0	0	0	0	0	0	0	2.52e-08	0	0	0	0	0
s__Massilia_timonae	4.33e-07	1.91e-07	2.03e-07	7.58e-07	2.98e-07	4.03e-07	2.98e-07	7.03e-07	5.54e-07	3.52e-07	3.86e-07	4.11e-07	8.09e-07	4.64e-07	5.56e-07
s__Colletotrichum_orbiculare	5.9e-08	8.51e-08	2.48e-07	3.99e-08	1.38e-07	1.21e-06	2.29e-08	7.03e-07	1.41e-06	0	1.21e-07	1.46e-06	2.53e-08	1.71e-07	7.25e-08
s__Gallus_gallus	3.93e-08	0	0	1.99e-08	4.59e-08	2.69e-08	0	0	0	0	2.41e-08	1.03e-07	0	4.89e-08	4.83e-08
s__Bacteroides_phage_B124-14	4.33e-07	7.66e-07	6.75e-07	5.58e-07	7.8e-07	1.61e-07	2.52e-07	7.94e-07	1.01e-07	1.18e-06	7.47e-07	5.14e-07	4.8e-07	2.2e-07	7.98e-07
s__Glycomyces_sp_NRRL_B-16210	9.83e-08	1.91e-07	1.35e-07	3.19e-07	9.17e-08	2.15e-07	1.37e-07	0	2.02e-07	0	3.13e-07	1.64e-07	3.03e-07	3.18e-07	1.93e-07
s__Lactococcus_phage_P335_sensu_lato	5.9e-08	0	4.5e-08	0	9.17e-08	0	2.29e-08	0	0	7.55e-08	0	4.11e-08	0	0	2.42e-08
s__Cytophaga_xylanolytica	0	0	0	0	0	0	0	0	5.04e-08	0	0	0	0	2.44e-08	0
s__Gabonibacter_massiliensis	0.000146225	0.000238293	0.000152358	0.000117698	0.000131119	0.000155554	0.000166267	0.000153213	0.000132133	0.000144413	0.000108798	0.000134523	0.000164202	0.000105673	0.000130153
s__Croceibacter_atlanticus	9.65e-06	8.66e-06	9.66e-06	8.34e-06	8.67e-06	9.92e-06	9.41e-06	1.1e-05	7.31e-06	1.06e-05	7.83e-06	8.98e-06	1.05e-05	6.36e-06	8.15e-06
s__Corallococcus_sp_CAG1435	2.27e-05	3.11e-05	1.84e-05	2.55e-05	2.82e-05	1.84e-05	2.22e-05	1.19e-05	3.37e-05	1.23e-05	1.08e-05	2.18e-05	5.73e-05	6.11e-05	1.07e-05
s__Haloplanus_natans	7.86e-08	0	2.25e-08	0	0	0	6.87e-08	0	0	0	0	4.11e-08	0	4.89e-08	2.42e-08
s__Serratia_sp_S4	5.9e-08	6.38e-08	0	1.99e-08	2.29e-08	0	0	0	0	0	0	0	0	0	0
s__Mycobacterium_lepromatosis	1.97e-08	0	0	1.99e-08	0	0	0	0	0	0	0	0	0	4.89e-08	0
s__Blautia_sp_CAG237	3.63e-05	2.96e-05	2.59e-05	0.000118855	5.27e-05	2.54e-05	5.49e-05	3.02e-05	5.54e-05	2.44e-05	7.97e-05	4.32e-05	3.86e-05	0.000123395	9.17e-05
s__Strongyloides_ratti	1.97e-08	2.13e-08	6.75e-08	0	2.29e-08	0	0	0	0	0	0	2.05e-08	0	2.44e-08	7.25e-08
s__Hydrogenophaga_intermedia	6.68e-07	8.51e-08	3.83e-07	1.4e-07	2.75e-07	4.03e-07	1.37e-07	0	3.28e-07	5.29e-07	5.06e-07	2.67e-07	3.29e-07	3.18e-07	1.93e-07
s__Exiguobacterium_sibiricum	1.71e-06	1.94e-06	1.49e-06	1.58e-06	1.42e-06	3.31e-06	6.18e-07	3.24e-06	3.68e-06	1.23e-06	1.57e-06	2.98e-06	2.55e-06	2.25e-06	2.68e-06
s__Mycobacterium_pseudoshottsii	5.9e-08	0	4.5e-08	0	0	5.38e-08	1.14e-07	2.27e-08	1.76e-07	0	9.64e-08	1.44e-07	7.58e-08	2.44e-08	1.21e-07
s__Synechococcus_sp_WH_8103	3.93e-08	0	2.25e-08	1.99e-08	0	0	6.87e-08	0	0	0	2.41e-08	4.11e-08	1.01e-07	1.22e-07	0
s__Serratia_sp_506_PEND	0	0	0	5.98e-08	0	0	0	0	0	2.52e-08	2.41e-08	0	0	0	0
s__Slackia_sp_CM382	2.12e-06	1.02e-06	3.56e-06	3.13e-06	2.36e-06	3.55e-06	4.69e-06	7.62e-06	2.92e-06	1.99e-06	4.8e-06	4.54e-06	3.08e-06	1.04e-05	3.77e-06
s__Streptomyces_sp_BoleA5	3.93e-08	8.51e-08	9.01e-08	1.6e-07	4.59e-08	1.08e-07	9.16e-08	1.36e-07	1.01e-07	5.03e-08	2.17e-07	4.11e-08	1.26e-07	4.64e-07	1.21e-07
s__Candidatus_Curtissbacteria_bacterium_GW2011_GWA1_40_47	5.9e-08	0	9.01e-08	0	6.88e-08	1.34e-07	2.29e-08	0	2.52e-08	2.52e-08	0	4.11e-08	1.26e-07	0	0
s__Dragonfly-associated_microphage_1	0	0	0	0	0	0	0	0	0	0	0	0	0	0	2.42e-08
s__Bouteloua_curtipendula	0	0	0	0	0	0	0	0	0	0	0	0	0	0	0
s__Clostridium_polynesiense	1.49e-05	8.23e-06	1.07e-05	2.75e-05	1.8e-05	8.39e-06	2.02e-05	1.81e-05	1.86e-05	7.05e-06	2.11e-05	1.58e-05	1.15e-05	2.34e-05	1.63e-05
s__Klebsiella_aerogenes	2.54e-06	1.94e-06	1.96e-06	3.39e-06	3.76e-06	1.67e-06	1.28e-06	1.61e-06	2.22e-06	2.44e-06	3.35e-06	1.31e-06	1.49e-06	3.94e-06	1.76e-06
s__Streptococcus_minor	1.16e-06	5.1e-07	1.06e-06	1.99e-06	4.13e-07	4.41e-06	1.44e-06	3.79e-06	3.5e-06	1.79e-06	3.18e-06	2.16e-06	1.49e-06	2.35e-06	2.39e-06
s__Fusicatenibacter_saccharivorans	0.000120314	8.22e-05	8.04e-05	0.000301894	0.000178105	0.000112278	0.000171878	0.000138176	0.000215988	8.11e-05	0.000296508	0.000163654	0.000114674	0.000387271	0.000259968
s__Actinomyces_sp_oral_taxon_448	4.13e-07	2.34e-07	2.03e-07	3.59e-07	9.17e-08	1.34e-07	2.75e-07	5.67e-07	2.27e-07	3.27e-07	1.93e-07	2.47e-07	1.14e-06	1.22e-06	4.83e-08
s__Eubacterium_siraeum	0.00013038	0.000139777	8.94e-05	0.000153141	8.53e-05	6.73e-05	9.09e-05	0.000167616	0.000110564	0.000115244	0.000194241	0.000103645	0.0001687	0.000170181	0.000186396
s__Yoonia_vestfoldensis	3.62e-06	8.72e-07	1.91e-06	2.07e-06	5.73e-07	2.55e-06	9.39e-07	2.65e-06	1.01e-06	1.54e-06	2.7e-06	1.11e-06	6.6e-06	1e-06	3.65e-06
s__Haloarcula_hispanica	1.97e-08	1.06e-07	0	1.99e-08	0	0	0	4.54e-08	2.52e-08	0	0	0	0	9.78e-08	1.69e-07
s__Novosphingobium_resinovorum	2.75e-07	2.13e-07	2.7e-07	1.2e-07	4.59e-08	1.61e-07	2.52e-07	1.36e-07	1.51e-07	7.55e-08	3.13e-07	1.03e-07	1.01e-07	1.47e-07	1.45e-07
s__Piromyces_equi	0	1.49e-07	0	9.97e-08	2.29e-08	0	2.29e-08	0	0	0	9.4e-07	1.23e-07	1.01e-07	0	1.69e-07
s__Pseudoalteromonas_gelatinilytica	2.36e-07	4.25e-07	2.25e-07	2.59e-07	1.83e-07	1.61e-07	5.95e-07	3.18e-07	5.54e-07	4.53e-07	2.65e-07	2.67e-07	1.01e-07	1.71e-07	1.93e-07
s__Agreia_sp_Leaf244	7.08e-07	6.38e-08	4.95e-07	5.98e-07	4.59e-07	4.03e-07	8.24e-07	2.04e-07	4.54e-07	2.77e-07	4.58e-07	3.29e-07	7.58e-08	3.91e-07	1.45e-07
s__Mycobacterium_sp_IS-1496	3.93e-08	6.38e-08	4.5e-08	3.99e-08	6.88e-08	0	6.87e-08	2.27e-08	0	2.52e-08	4.82e-08	0	4.04e-07	6.84e-07	0
s__Clostridiales_bacterium_VE202-07	4.76e-06	9.32e-06	2.57e-06	1.03e-05	4.82e-06	1.61e-06	8.22e-06	2.25e-06	9.9e-06	3.45e-06	1.48e-05	5.75e-06	9.6e-06	1.32e-05	1.07e-05
s__Alkalilimnicola_ehrlichii	5.11e-07	5.1e-07	5.4e-07	6.58e-07	6.42e-07	5.11e-07	4.58e-07	2.49e-07	5.04e-07	1.51e-07	2.89e-07	4.93e-07	4.3e-07	3.91e-07	1.45e-07
s__Thioalkalivibrio_sp_ALE23	1.12e-06	4.68e-07	6.75e-07	3.79e-07	6.65e-07	4.84e-07	6.18e-07	3.4e-07	9.32e-07	6.29e-07	3.37e-07	6.57e-07	5.05e-07	3.91e-07	6.28e-07
s__Azorhizobium_doebereinerae	6.49e-07	5.74e-07	1.28e-06	1.02e-06	3.44e-07	1.05e-06	5.27e-07	8.17e-07	6.3e-07	7.05e-07	5.78e-07	4.73e-07	6.82e-07	3.91e-07	9.43e-07
s__Enterococcus_phage_EFDG1	5.9e-08	8.51e-08	2.25e-08	1.2e-07	4.59e-08	8.06e-08	1.83e-07	4.54e-08	1.51e-07	5.03e-08	1.45e-07	2.05e-08	7.58e-08	3.18e-07	0
s__Novosphingobium_sp_ST904	7.86e-08	2.13e-07	6.75e-08	2.19e-07	1.61e-07	1.08e-07	1.14e-07	9.07e-08	1.76e-07	1.51e-07	4.82e-08	4.11e-08	7.58e-08	4.89e-08	7.25e-08
s__Legionella_sp_91-004	5.9e-08	2.13e-08	0	0	0	0	1.37e-07	0	2.52e-08	0	0	0	2.53e-08	2.44e-08	4.83e-08
s__Sphingomonas_sp_NS2	1.18e-07	0	2.25e-08	0	4.59e-08	4.84e-07	2.29e-08	2.49e-07	7.31e-07	2.52e-08	0	6.16e-07	0	1.47e-07	0
s__Streptomyces_sp_ScaeMP-e10	0	0	0	0	0	2.69e-08	2.29e-08	0	2.52e-08	0	0	0	2.53e-08	0	4.83e-08
s__uncultured_bacterium_A2_10	0	0	0	1.2e-07	0	0	0	0	2.52e-08	0	2.41e-08	4.11e-08	0	0	0
s__Bacillus_virus_JBP901	5.9e-08	4.25e-08	9.01e-08	1.99e-08	4.59e-08	5.38e-08	0	1.59e-07	2.52e-08	5.03e-08	1.93e-07	2.05e-08	0	9.78e-08	2.42e-08
s__Ottowia_sp_oral_taxon_894	1.65e-06	8.72e-07	1.55e-06	6.98e-07	1.17e-06	4.57e-07	9.39e-07	5.22e-07	7.56e-07	1.43e-06	9.88e-07	1.13e-06	1.14e-06	9.04e-07	4.83e-07
s__Saccharomonospora_marina	1.97e-08	0	4.5e-08	5.98e-08	1.15e-07	2.69e-08	2.29e-08	4.54e-08	1.26e-07	5.03e-08	2.41e-08	1.03e-07	2.53e-08	4.89e-08	2.42e-08
s__Acinetobacter_gandensis	5.9e-07	4.25e-07	5.4e-07	9.97e-08	8.94e-07	7.53e-07	4.58e-07	8.39e-07	6.55e-07	3.02e-07	2.41e-07	4.31e-07	4.04e-07	3.18e-07	5.08e-07
s__Sutterella_sp_CAG351	1.24e-06	2.62e-06	8.11e-07	1.78e-06	2.02e-06	5.43e-06	7.33e-07	7.71e-07	3.05e-06	3.45e-06	1.35e-06	2.26e-06	2.65e-06	1.17e-06	2.63e-06
s__Rhodococcus_opacus	3.54e-07	4.04e-07	6.3e-07	5.39e-07	3.21e-07	2.69e-07	4.58e-07	1.13e-06	2.02e-07	2.01e-07	1.93e-07	2.47e-07	1.52e-07	1.08e-06	7.01e-07
s__Vibrio_ponticus	4.52e-07	5.32e-07	5.18e-07	3.79e-07	2.75e-07	3.76e-07	1.85e-06	6.58e-07	6.3e-07	7.55e-07	4.82e-07	6.16e-07	1.52e-07	5.87e-07	4.11e-07
s__Staphylococcus_succinus	1.4e-06	1.49e-07	9.93e-06	7.38e-07	1.58e-06	2.42e-07	6.18e-07	3.4e-07	3.53e-07	2.01e-07	1.69e-07	1.64e-07	1.52e-07	2.84e-06	2.66e-07
s__Methanoculleus_marisnigri	7.47e-07	3.4e-07	4.28e-07	7.18e-07	7.34e-07	2.15e-07	8.24e-07	3.86e-07	9.32e-07	2.77e-07	8.19e-07	3.9e-07	2.27e-07	1.27e-06	2.66e-07
s__Nocardia_nova	1.97e-08	1.28e-07	2.48e-07	3.39e-07	2.06e-07	8.06e-08	1.37e-07	1.36e-07	1.01e-07	1.01e-07	1.45e-07	4.11e-08	1.01e-07	1.71e-07	1.93e-07
s__Salinibacterium_sp_PAMC_21357	3.74e-07	1.91e-07	1.13e-07	2.19e-07	1.61e-07	1.08e-07	3.66e-07	4.54e-08	2.27e-07	2.01e-07	1.45e-07	1.23e-07	7.58e-08	4.16e-07	1.21e-07
s__Prasinococcus_capsulatus	0	0	0	0	0	2.69e-08	1.6e-07	0	7.56e-08	0	0	2.05e-08	0	0	0
s__Triticum_urartu	3.63e-05	5.1e-07	1.31e-06	1.6e-07	1.61e-07	3.55e-06	9.39e-07	1.59e-07	2.52e-08	1.13e-06	1.69e-05	4.77e-06	4.25e-06	9.53e-07	2.05e-06
s__candidate_division_WS6_bacterium_GW2011_GWF2_33_92	0	0	0	0	0	0	0	2.27e-08	0	0	0	0	0	2.44e-08	0
s__Campylobacter_jejuni	8.43e-06	8.7e-06	7.38e-06	2.5e-05	2.46e-05	1.17e-05	8.5e-06	9.78e-06	1.72e-05	9.26e-06	1.71e-05	9.92e-06	7.83e-06	2.67e-05	1.71e-05
s__Afipia_sp_P52-10	1.08e-06	1.06e-06	5.4e-07	6.38e-07	8.48e-07	4.03e-07	4.81e-07	7.71e-07	9.07e-07	6.8e-07	6.51e-07	4.52e-07	2.78e-07	3.42e-07	2.9e-07
s__Lactobacillus_phage_CL1	0	0	0	0	4.59e-08	0	0	0	2.52e-08	0	0	0	0	0	0
s__Xenophilus_azovorans	2.56e-07	3.4e-07	2.48e-07	4.39e-07	2.98e-07	2.69e-08	1.83e-07	1.81e-07	2.02e-07	3.78e-07	4.1e-07	3.29e-07	5.05e-07	4.89e-08	3.14e-07
s__Sebastes_umbrosus	0	0	0	0	0	0	0	0	0	0	0	0	0	2.44e-08	0
s__Streptococcus_sp_GMD4S	0	0	0	0	0	0	0	0	0	0	0	0	0	2.44e-08	0
s__Staphylococcus_hominis_subsp_novobiosepticus	0	0	0	1.99e-08	0	0	0	6.8e-08	0	0	0	4.11e-08	0	0	0
s__Alternaria_alternata	7.86e-08	1.28e-07	9.01e-08	3.99e-08	4.59e-08	0	0	2.27e-08	0	0	2.41e-08	6.16e-08	2.53e-08	1.71e-07	0
s__Burkholderia_sp_JPY251	9.83e-08	1.06e-07	1.58e-07	3.99e-08	1.15e-07	1.34e-07	1.14e-07	6.8e-08	2.77e-07	2.01e-07	9.64e-08	2.47e-07	2.27e-07	5.62e-07	4.83e-08
s__Enterobacteria_phage_phi92	0	0	0	0	0	0	0	0	0	0	0	0	0	2.44e-08	0
s__Trichophyton_rubrum	3.93e-08	0	2.25e-08	1.99e-08	2.29e-08	0	4.58e-08	6.8e-08	0	2.52e-08	2.41e-08	0	5.05e-08	7.33e-08	0
s__Calyptogena_kilmeri_gill_symbiont	0	0	0	0	0	0	0	0	0	0	0	0	2.53e-08	0	0
s__Thalassospira_mesophila	0	0	0	0	0	0	0	0	0	0	0	0	0	0	0
s__Auricularia_subglabra	5.9e-08	4.25e-08	2.25e-07	1.6e-07	1.15e-07	0	1.37e-07	0	7.56e-08	1.26e-07	7.23e-08	6.16e-08	2.53e-08	2.44e-08	0
s__Trachymyrmex_septentrionalis	2.01e-06	6.17e-07	1.96e-06	9.97e-07	1.56e-06	1.21e-06	1.12e-06	6.58e-07	1.39e-06	2.24e-06	1.74e-06	1.17e-06	1.04e-06	1.3e-06	8.94e-07
s__Neonectria_ditissima	1.97e-08	0	0	7.98e-08	2.29e-07	2.69e-08	6.87e-08	2.27e-08	2.52e-08	0	4.82e-07	1.23e-07	0	7.33e-08	2.42e-08
s__Vibrio_sp_UCD-FRSSP16_30	1.97e-07	3.83e-07	1.35e-07	2.19e-07	3.9e-07	5.38e-08	2.75e-07	1.59e-07	3.02e-07	3.27e-07	2.17e-07	1.64e-07	1.77e-07	7.33e-08	9.67e-08
s__Eubacterium_hallii_CAG12	4.38e-06	3.06e-06	2.72e-06	1.17e-05	5.96e-06	4.06e-06	7.03e-06	6.78e-06	8.14e-06	3.37e-06	1.16e-05	7.27e-06	3.92e-06	1.52e-05	1.06e-05
s__Candidatus_Wolfebacteria_bacterium_GW2011_GWA1_47_6	5.7e-07	0	2.25e-08	1.99e-07	2.29e-07	3.23e-07	2.06e-07	6.8e-08	1.76e-07	2.77e-07	1.45e-07	2.88e-07	1.52e-07	1.22e-07	2.42e-08
s__Ralstonia_pickettii	1.99e-06	1.68e-06	1.19e-06	1.62e-06	1.79e-06	1.91e-06	1.44e-06	1.36e-06	1.66e-06	2.01e-06	1.52e-06	1.62e-06	1.79e-06	1.59e-06	2.73e-06
s__Corynebacterium_accolens	1.06e-06	5.53e-07	3.6e-07	1.02e-06	2.29e-07	3.49e-07	2.52e-07	4.54e-07	3.78e-07	1.06e-06	6.27e-07	2.05e-07	1.24e-06	7.58e-07	6.04e-07
s__uncultured_bacterium_Contig54	1.97e-07	4.25e-08	1.8e-07	2.39e-07	2.29e-07	2.96e-07	0	1.59e-07	2.52e-08	1.01e-07	1.69e-07	4.93e-07	2.02e-07	2.2e-07	2.42e-08
s__Wolbachia_endosymbiont_of_Nasonia_vitripennis	0	4.25e-08	0	0	4.59e-08	0	0	0	0	0	0	0	0	0	0
s__Enterobacter_sp_Bisph1	5.9e-08	2.34e-07	9.01e-08	9.97e-08	1.38e-07	1.08e-07	2.98e-07	1.36e-07	2.02e-07	1.26e-07	7.23e-08	2.26e-07	1.01e-07	4.4e-07	1.69e-07
s__Achromobacter_piechaudii	2.56e-06	8.51e-07	8.56e-07	1.48e-06	1.54e-06	9.68e-07	9.39e-07	9.98e-07	1.08e-06	1.41e-06	1.04e-06	7.6e-07	1.36e-06	1.44e-06	1.04e-06
s__Clostridium_sp_CAG470	0.000439717	5.33e-05	0.000113453	0.000242377	6.54e-05	0.000147221	0.000256855	0.000124408	0.000128454	0.000105755	0.000271755	0.000407472	0.000164126	6.34e-05	5.76e-05
s__Longispora_albida	4.13e-07	1.91e-07	4.95e-07	6.58e-07	1.15e-07	1.61e-07	9.85e-07	2.04e-07	3.53e-07	5.03e-07	2.65e-07	1.23e-07	3.03e-07	3.42e-07	1.93e-07
s__Clostridium_ventriculi	7.43e-06	6.4e-06	3.49e-06	1.14e-05	4.93e-06	1.09e-05	5.11e-06	7.19e-06	8.97e-06	4.73e-06	9.76e-06	8.94e-06	6.47e-06	9.51e-06	7.64e-06
s__Dokdonia_sp_4H-3-7-5	1.04e-05	7.4e-06	8.94e-06	5.84e-06	1.38e-05	7.55e-06	8.36e-06	8.71e-06	9.47e-06	1.08e-05	5.57e-06	7.95e-06	5.43e-06	4.64e-06	5.82e-06
s__Nocardiopsis_xinjiangensis	4.33e-07	6.38e-08	2.25e-08	0	2.29e-08	5.38e-08	4.58e-08	0	7.56e-08	2.52e-08	1.69e-07	0	0	7.33e-08	0
s__uncultured_bacterium_A1Q1_fos_550	1.97e-08	0	0	0	0	0	0	0	0	0	0	0	0	0	0
s__endosymbiont_of_Acanthamoeba_sp_UWC8	2.36e-07	1.28e-07	2.48e-07	4.99e-07	2.52e-07	2.69e-07	1.6e-07	1.81e-07	3.53e-07	2.27e-07	3.62e-07	2.26e-07	1.77e-07	4.64e-07	1.21e-07
s__Xanthobacteraceae_bacterium_501b	1.97e-08	0	0	0	0	0	0	0	0	0	0	0	0	0	0
s__Vitellibacter_aquimaris	5.8e-06	6.81e-06	6.89e-06	7.22e-06	5.32e-06	6.05e-06	7.21e-06	4.99e-06	4.64e-06	6.54e-06	6.17e-06	4.23e-06	8.74e-06	4.67e-06	6.6e-06
s__Moniliophthora_roreri	2.36e-07	1.28e-07	6.75e-08	1.99e-07	2.75e-07	2.69e-08	9.16e-08	2.27e-07	2.02e-07	1.51e-07	2.89e-07	2.67e-07	5.05e-08	7.33e-08	1.45e-07
s__Desulfonauticus_autotrophicus	0	0	2.25e-08	3.99e-08	0	0	0	0	0	0	2.41e-08	0	0	7.33e-08	0
s__Prochlorococcus_sp_MIT_0602	5.9e-08	2.13e-08	0	1.99e-08	0	0	0	0	0	0	0	0	0	0	0
s__Bulleidia_extructa	3.62e-06	3.02e-06	2.05e-06	5.11e-06	2.75e-06	8.06e-06	3.16e-06	9.84e-06	1.01e-05	4.38e-06	6.56e-06	5.36e-06	3.11e-06	8.95e-06	4.91e-06
s__Massilia_alkalitolerans	1.65e-06	1.38e-06	2.3e-06	1.02e-06	1.4e-06	1.94e-06	1.6e-06	1.57e-06	2.54e-06	1.99e-06	7.23e-07	2.79e-06	1.36e-06	1.32e-06	1.11e-06
s__Pseudonocardia_alni	0	0	0	1.99e-08	0	0	0	0	0	0	0	0	0	0	0
s__Lawsonella_clevelandensis	1.24e-06	1.51e-06	9.23e-07	1.4e-06	1.19e-06	9.41e-07	1.05e-06	1.18e-06	1.08e-06	2.06e-06	1.16e-06	6.37e-07	2.05e-06	1.3e-06	9.91e-07
s__Paenibacillus_oryzae	8.12e-06	7.64e-06	5.45e-06	1.28e-05	7.38e-06	9.68e-06	7.12e-06	9.21e-06	9.15e-06	7.2e-06	1.75e-05	7.99e-06	9.6e-06	1.44e-05	1.27e-05
s__Flexistipes_sinusarabici	6.68e-07	6.17e-07	8.78e-07	3.51e-06	1.28e-06	7.26e-07	1.6e-06	4.76e-07	1.46e-06	9.06e-07	7.23e-07	6.57e-07	9.6e-07	6.36e-07	1.14e-06
s__Bacillus_marmarensis	9.24e-07	3.19e-07	4.73e-07	7.38e-07	5.04e-07	6.18e-07	1.03e-06	7.26e-07	1.26e-06	3.02e-07	4.58e-07	6.16e-07	8.34e-07	1.96e-06	8.94e-07
s__Candidatus_Nomurabacteria_bacterium_GW2011_GWA1_35_8	3.93e-07	4.25e-08	5.63e-07	1.4e-07	6.42e-07	3.76e-07	2.11e-06	2.27e-08	4.03e-07	4.53e-07	1.21e-07	3.08e-07	2.53e-07	4.4e-07	2.66e-07
s__Microgenomates_bacterium_OLB22	5.9e-08	0	1.8e-07	9.97e-08	4.59e-08	1.08e-07	0	2.27e-08	1.26e-07	5.03e-08	2.41e-08	8.22e-08	1.26e-07	1.56e-06	0
s__Bacteroides_stercoris	0.00109464	0.00118674	0.00103791	0.000865711	0.000910932	0.00115417	0.000909101	0.00107533	0.00101032	0.0010345	0.000825267	0.00108107	0.00119631	0.000636505	0.000986434
s__Mycobacterium_phage_Chy1	0	0	0	0	0	2.69e-08	0	0	0	0	0	0	0	0	0
s__Staphylococcus_cohnii_subsp_cohnii	2.42e-06	1.06e-07	2.24e-05	1.12e-06	2.71e-06	1.88e-07	5.95e-07	2.27e-08	1.51e-07	7.55e-08	7.23e-08	2.26e-07	2.53e-08	5.48e-06	4.35e-07
s__Williamsia_sp_D3	7.86e-08	2.13e-08	2.7e-07	1.2e-07	1.15e-07	0	6.18e-07	2.27e-08	1.01e-07	1.26e-07	2.41e-08	6.16e-08	5.05e-08	2.44e-08	0
s__Halobiforma_nitratireducens	5.9e-08	2.13e-08	2.25e-08	3.99e-08	2.29e-08	0	9.16e-08	0	5.04e-08	0	4.82e-08	2.05e-08	2.53e-08	4.89e-08	2.42e-08
s__Providencia_stuartii	2.32e-06	1.81e-06	2.23e-06	1.97e-06	2.87e-06	3.41e-06	2.13e-06	3.67e-06	3.17e-06	1.76e-06	1.57e-06	3.78e-06	1.16e-06	1.91e-06	1.55e-06
s__Methylobacterium_sp_B1	1.97e-08	2.13e-08	2.25e-08	3.99e-08	9.17e-08	2.69e-08	4.58e-08	0	5.04e-08	0	0	0	0	0	2.42e-08
s__uncultured_bacterium_DCM002Kan01	7.86e-08	0	4.5e-08	2.59e-07	1.61e-07	0	0	0	0	0	1.4e-06	1.64e-07	0	0	1.45e-07
s__Clostridium_beijerinckii	4.57e-05	3.2e-05	2.78e-05	9.47e-05	5.22e-05	5.51e-05	5.22e-05	4.82e-05	6.2e-05	3.06e-05	9.4e-05	5.11e-05	3.83e-05	9.13e-05	6.66e-05
s__Amazona_sp_1_PG-2015	0	0	0	0	0	0	0	0	0	2.52e-08	0	0	0	0	0
s__Clostridium_sp_CAG451	8.75e-05	8.32e-06	3.21e-05	0.000141712	4.35e-05	0.000152006	2.48e-05	0.000151036	0.000150829	1.75e-05	7.78e-05	7.33e-05	4.96e-05	7.61e-05	2.3e-05
s__Curtobacterium_flaccumfaciens	5.9e-07	1.7e-07	4.73e-07	7.38e-07	3.9e-07	2.96e-07	8.7e-07	3.63e-07	3.02e-07	5.54e-07	2.89e-07	2.47e-07	2.02e-07	7.33e-07	2.66e-07
s__Candidatus_Beckwithbacteria_bacterium_GW2011_GWB1_47_15	1.97e-08	0	0	1.99e-08	0	0	0	0	5.04e-08	2.52e-08	0	0	0	0	0
s__Solanum_pennellii	1.18e-07	0	0	0	0	0	0	0	2.52e-08	0	7.23e-08	2.05e-08	2.53e-08	2.44e-08	0
s__Flavobacterium_indicum	9.53e-06	9.76e-06	9.79e-06	7.86e-06	8.14e-06	9.14e-06	1.01e-05	8.53e-06	9.42e-06	1.09e-05	6.63e-06	8.88e-06	8.04e-06	6.31e-06	7.42e-06
s__Jaculus_jaculus	5.9e-08	0	4.5e-08	5.98e-08	4.59e-08	2.69e-07	9.16e-08	2.27e-08	2.52e-08	1.01e-07	0	8.22e-08	0	2.44e-08	1.69e-07
s__Candidatus_Bathyarchaeota_archaeon_B63	0	0	2.25e-08	2.39e-07	9.17e-08	2.69e-08	4.58e-08	2.27e-08	2.52e-08	0	1.45e-07	2.05e-08	2.27e-07	1.47e-07	3.14e-07
s__Exiguobacterium_enclense	1.38e-07	1.91e-07	4.5e-08	7.98e-08	2.29e-08	2.15e-07	1.37e-07	0	7.56e-08	1.26e-07	0	8.22e-08	1.52e-07	1.47e-07	9.67e-08
s__Streptomyces_antibioticus	2.75e-07	4.04e-07	2.93e-07	3.99e-07	4.82e-07	2.15e-07	5.04e-07	1.36e-07	2.77e-07	2.52e-07	2.17e-07	3.29e-07	1.77e-07	1.96e-07	4.35e-07
s__Hymenobacter_sp_DG25A	1.66e-05	1.89e-05	1.74e-05	1.62e-05	1.26e-05	2.23e-05	1.55e-05	1.67e-05	1.53e-05	1.88e-05	1.56e-05	1.73e-05	2.44e-05	1.23e-05	1.81e-05
s__Atribacteria_bacterium_34_868	0	6.38e-08	0	5.98e-08	4.59e-08	0	1.14e-07	2.27e-08	7.56e-08	0	2.41e-08	6.16e-08	5.05e-08	4.89e-08	9.67e-08
s__Hymenobacter_sp_IS2118	7.84e-06	7.7e-06	5.97e-06	6.96e-06	6.31e-06	7.07e-06	8.17e-06	1.12e-05	5.92e-06	9.26e-06	5.71e-06	6.68e-06	8.04e-06	5.45e-06	7.44e-06
s__Oleiphilus_sp_HI0130	0	0	0	3.99e-08	0	0	0	0	2.52e-08	0	0	6.16e-08	7.58e-08	2.44e-08	2.42e-08
s__Syntrophomonas_wolfei_subsp_wolfei	6.29e-07	4.04e-07	4.5e-07	5.39e-07	3.44e-07	1.61e-07	1.14e-06	1.13e-07	7.81e-07	3.52e-07	7.71e-07	3.7e-07	2.27e-07	6.11e-07	3.87e-07
s__Ureaplasma_urealyticum	1.28e-06	6.66e-06	4.5e-08	9.97e-08	2.96e-06	1.34e-07	2.98e-06	1.57e-06	2.27e-07	1.89e-06	4.58e-07	9.66e-07	2.53e-08	9.78e-08	4.83e-08
s__uncultured_bacterium_IN-09	0	0	0	0	4.59e-08	0	0	0	0	0	0	0	0	0	0
s__Plesiomonas_shigelloides	4.13e-06	3e-06	3.38e-06	2.61e-06	2.71e-06	1.85e-06	1.58e-06	2.79e-06	2.14e-06	3.37e-06	2.48e-06	2.38e-06	4.88e-06	1.49e-06	2.3e-06
s__Streptomyces_sp_SM8	0	0	0	3.99e-08	0	0	2.29e-08	0	2.52e-08	0	0	0	5.05e-08	2.44e-08	0
s__Aureoumbra_lagunensis	0	0	0	0	0	0	0	0	0	0	0	0	0	0	0
s__Sphingomonas_sp_Leaf198	4.72e-07	6.81e-07	4.28e-07	3.59e-07	2.75e-07	4.84e-07	4.58e-07	1.13e-07	3.53e-07	9.06e-07	9.16e-07	2.05e-07	7.83e-07	4.64e-07	4.59e-07
s__Eubacteriaceae_bacterium_CHKCI005	4.65e-05	3.49e-05	2.63e-05	7.49e-05	7.25e-05	2.95e-05	4.03e-05	4.2e-05	6.4e-05	2.31e-05	7.83e-05	4.72e-05	3.6e-05	0.000112737	6.08e-05
s__beta_proteobacterium_AAP65	1.97e-08	2.13e-08	0	3.99e-08	0	0	0	0	0	0	1.93e-07	0	5.05e-08	0	2.42e-08
s__Agrobacterium_sp_D14	1.97e-08	0	0	1.4e-07	0	8.06e-08	4.58e-08	2.27e-08	7.56e-08	0	9.64e-08	6.16e-08	2.53e-08	1.47e-07	2.18e-07
s__Butyrivibrio_sp_VCB2006	3.39e-05	2.63e-05	1.9e-05	5.54e-05	2.94e-05	1.28e-05	2.97e-05	1.96e-05	2.98e-05	1.76e-05	5.03e-05	2.48e-05	3.02e-05	5.71e-05	6.93e-05
s__uncultured_Cellvibrio_sp	1.18e-06	9.57e-07	2.61e-06	1.12e-06	2.27e-06	1.37e-06	8.36e-06	1.29e-06	2.12e-06	1.33e-06	6.27e-07	1.89e-06	1.14e-06	8.07e-07	4.59e-07
s__Haplocarpha_lanata	0	0	0	0	0	0	0	0	0	2.52e-08	0	0	0	0	0
s__Bifidobacterium_pseudolongum_subsp_pseudolongum	1.75e-06	1.77e-06	2.03e-07	5.98e-08	5.03e-05	0.000372583	6.64e-07	1.16e-06	6.55e-07	0.000225353	0.000418249	0.000536263	8.84e-05	0.00013437	1.38e-06
s__Calothrix_sp_336/3	1.12e-06	4.04e-07	6.75e-07	6.78e-07	7.34e-07	9.95e-07	5.04e-07	3.4e-07	5.29e-07	7.3e-07	7.23e-07	5.34e-07	4.04e-07	6.36e-07	9.67e-07
s__Geobacter_anodireducens	3.34e-07	5.96e-07	4.28e-07	7.58e-07	7.34e-07	9.95e-07	8.01e-07	1.2e-06	1.23e-06	3.27e-07	7.47e-07	1.99e-06	7.58e-08	6.84e-07	8.22e-07
s__Pseudomonas_sp_BAY1663	7.86e-07	3.19e-07	9.01e-07	5.19e-07	1.31e-06	3.23e-07	1.1e-06	2.04e-07	6.05e-07	4.03e-07	6.51e-07	3.7e-07	3.54e-07	3.91e-07	5.08e-07
s__Sulfitobacter_pseudonitzschiae	1.38e-07	1.28e-07	4.5e-08	1.4e-07	1.38e-07	2.42e-07	6.87e-08	6.8e-08	0	1.01e-07	1.93e-07	8.22e-08	1.26e-07	4.89e-08	3.14e-07
s__Mitsuokella_sp_oral_taxon_131	6.51e-06	5.87e-06	6.17e-06	9.41e-06	7.04e-06	7.15e-06	8.82e-06	9.64e-06	1.14e-05	6.09e-06	1.01e-05	7.23e-06	8.97e-06	1.37e-05	1.11e-05
s__Clostridium_sp_M62/1	0.000108853	0.000112	6.32e-05	0.000267548	0.000168588	6.46e-05	0.000162512	8.29e-05	0.00017086	6.51e-05	0.000235288	0.000117656	9.98e-05	0.000579232	0.000242228
s__Synechococcus_sp_PCC_7502	5.31e-07	3.4e-07	9.46e-07	6.98e-07	1.61e-07	4.3e-07	1.05e-06	8.62e-07	9.07e-07	5.03e-07	2.89e-07	3.7e-07	3.03e-07	4.4e-07	3.63e-07
s__Acinetobacter_sp_NIPH_2100	5.9e-08	4.25e-08	6.75e-08	1.99e-08	4.59e-08	0	2.29e-08	6.8e-08	0	0	1.21e-07	0	5.05e-08	2.44e-08	2.42e-08
s__Rhodobacteraceae_bacterium_HLUCCA12	4.72e-07	1.15e-06	6.75e-08	3.39e-07	9.86e-07	2.96e-07	5.04e-07	2.72e-07	2.52e-07	7.05e-07	3.13e-07	5.75e-07	4.3e-07	3.18e-07	9.67e-08
s__Tenacibaculum_dicentrarchi	4.84e-06	9.27e-06	7.09e-06	7.48e-06	4.43e-06	7.26e-06	8.13e-06	7.33e-06	4.26e-06	6.97e-06	7.45e-06	5.46e-06	8.74e-06	5.4e-06	7.78e-06
s__Candidatus_Nitrospira_inopinata	1.53e-06	7.87e-07	1.71e-06	1.08e-06	1.08e-06	1.42e-06	1.17e-06	7.48e-07	1.69e-06	1.54e-06	1.37e-06	1.15e-06	7.83e-07	1.74e-06	8.22e-07
s__uncultured_bacterium_Ad_091_F22_contig2	1.79e-06	4.1e-06	1.28e-06	1.22e-06	2.87e-06	1.96e-06	1.37e-06	1.47e-06	1.16e-06	1.69e-06	1.86e-06	1.56e-06	8.59e-07	1e-06	1.64e-06
s__Saccharomonospora_sp_CNQ490	2.16e-07	3.62e-07	2.03e-07	3.59e-07	2.06e-07	4.57e-07	6.41e-07	1.59e-07	1.01e-07	2.52e-07	3.62e-07	2.47e-07	4.3e-07	4.4e-07	4.35e-07
s__Bacteroidales_bacterium_KA00344	0.000160065	0.000218938	0.000184397	0.000134811	0.000129445	0.000171198	0.000159237	0.000159292	0.000143496	0.000176552	0.000126128	0.000147383	0.000171985	0.000101493	0.000143906
s__Parcubacteria_group_bacterium_GW2011_GWA1_47_9	1.77e-07	6.38e-08	1.35e-07	7.98e-08	1.61e-07	0	4.12e-07	6.8e-08	1.76e-07	7.55e-08	4.82e-08	1.44e-07	3.03e-07	3.18e-07	4.83e-08
s__Parcubacteria_group_bacterium_GW2011_GWA2_52_8	1.77e-07	0	1.13e-07	5.98e-08	6.88e-08	0	4.58e-07	9.07e-08	7.56e-08	7.55e-08	2.41e-08	6.16e-08	5.05e-08	1.71e-07	7.25e-08
s__candidate_division_WWE3_bacterium_GW2011_GWC1_42_102	0	0	2.25e-08	1.99e-08	2.29e-08	0	0	0	0	0	0	0	0	0	0
s__Azumapecten_farreri	1.97e-08	0	0	0	0	0	0	0	0	0	0	0	0	0	0
s__Aspergillus_ruber	3.93e-08	2.13e-08	9.01e-08	0	0	2.69e-08	2.29e-07	4.54e-08	1.01e-07	0	2.65e-07	4.11e-08	5.05e-08	0	7.25e-08
s__Parcubacteria_group_bacterium_GW2011_GWA1_33_6	0	0	1.8e-07	0	0	2.69e-08	6.87e-08	4.54e-08	5.04e-08	7.55e-08	0	0	0	0	0
s__Streptomyces_sp_ML694-90F3	0	0	0	1.2e-07	0	0	4.58e-08	4.54e-08	0	0	0	0	0	0	0
s__Dethiosulfovibrio_peptidovorans	4.91e-06	5.06e-06	3.71e-06	4.91e-06	5.02e-06	4.49e-06	3.71e-06	6.1e-06	6.8e-06	4.38e-06	5.74e-06	4.83e-06	7.56e-06	8.53e-06	7.61e-06
s__Bacillus_phage_Vinny	1.77e-07	7.87e-07	9.91e-07	1.4e-06	2.06e-07	6.72e-07	4.12e-07	3.86e-07	2.27e-07	5.54e-07	1.18e-06	7.19e-07	1.26e-07	5.38e-07	5.32e-07
s__Chlamydia_pecorum	3.34e-07	2.34e-07	5.18e-07	2.99e-07	1.83e-07	2.42e-07	3.89e-07	3.18e-07	3.78e-07	3.52e-07	1.45e-07	1.44e-07	2.02e-07	9.78e-08	1.69e-07
s__Pedobacter_sp_V48	1.58e-05	1.88e-05	1.74e-05	1.4e-05	1.41e-05	1.45e-05	1.88e-05	1.41e-05	1.16e-05	1.68e-05	1.16e-05	1.28e-05	1.72e-05	8.36e-06	1.18e-05
s__Sporisorium_reilianum	0	2.34e-07	0	0	2.29e-08	2.69e-08	0	2.27e-08	0	0	0	0	0	2.44e-08	0
s__Candidatus_Uzinura_diaspidicola	1.18e-07	2.34e-07	0	3.99e-08	4.59e-08	1.34e-07	4.58e-08	0	5.04e-08	1.26e-07	7.23e-08	0	5.05e-08	2.44e-08	2.42e-08
s__Lactobacillus_acetotolerans	3.6e-06	4.13e-06	4.73e-06	2.35e-06	5.27e-06	3.48e-05	2.07e-05	7.73e-06	8.74e-06	3.48e-05	1.45e-05	1.71e-05	8.87e-06	1.78e-05	3.14e-05
s__uncultured_delta_proteobacterium_HF0770_45N15	5.9e-08	8.51e-08	4.5e-08	1.99e-08	0	1.08e-07	4.58e-08	6.8e-08	7.56e-08	2.52e-08	4.82e-08	0	5.05e-08	0	0
s__Microbacterium_sp_URHA0036	5.9e-08	1.49e-07	6.75e-08	9.97e-08	1.38e-07	2.69e-07	6.87e-08	2.04e-07	4.54e-07	5.03e-08	2.41e-08	1.85e-07	7.58e-08	1.22e-07	4.83e-08
s__Bacillus_phage_Basilisk	0	0	0	0	2.29e-08	2.69e-08	0	0	0	0	0	0	0	0	2.42e-08
s__Candidatus_Amesbacteria_bacterium_GW2011_GWA1_46_35	1.97e-08	2.13e-07	0	0	2.29e-08	0	2.52e-07	4.54e-08	0	1.01e-07	4.82e-08	2.05e-08	5.05e-08	7.33e-08	2.42e-08
s__Acinetobacter_sp_CIP_647	0	0	0	0	0	0	0	0	5.04e-08	0	0	0	0	0	0
s__Sodalis_virus_SO1	0	4.25e-08	0	0	0	2.69e-08	0	0	0	0	0	0	0	0	0
s__Clostridium_sp_CAG167	0.000102385	0.000129015	4.67e-05	0.000241021	5.98e-05	2.98e-05	0.000463195	0.000121868	0.000110262	0.000146376	0.000475974	0.000194409	7.41e-05	0.000730297	0.000116159
s__uncultured_bacterium_eBACmed18B02	0	4.25e-08	0	0	0	0	0	2.27e-08	2.52e-08	0	0	0	0	0	0
s__Candidatus_Microthrix_parvicella	1.61e-06	8.08e-07	1.46e-06	1.1e-06	1.47e-06	5.64e-07	1.97e-06	6.58e-07	9.57e-07	1.43e-06	6.51e-07	7.81e-07	8.09e-07	1.32e-06	6.77e-07
s__Candidatus_Phytoplasma_luffae	0	0	0	1.99e-08	0	0	0	0	0	0	0	0	0	0	0
s__Photorhabdus_laumondii_subsp_laumondii	0	2.34e-07	0	9.97e-08	0	0	2.29e-08	9.07e-08	0	0	4.82e-08	0	7.58e-08	4.89e-08	7.25e-08
s__Pandoraea_sputorum	1.97e-08	2.13e-08	0	1.99e-08	1.15e-07	1.61e-07	4.58e-08	6.8e-08	2.52e-08	7.55e-08	1.21e-07	1.64e-07	2.02e-07	7.33e-08	2.42e-08
s__Methanocaldococcus_sp_FS406-22	1.77e-07	0	0	1.99e-08	0	0	1.83e-07	0	7.56e-08	0	2.41e-08	6.16e-08	2.53e-08	2.44e-08	2.42e-08
s__Lactobacillus_kefiranofaciens_subsp_kefiranofaciens	8.06e-07	9.78e-07	6.08e-07	2.39e-07	2.57e-06	7.26e-06	4.95e-06	1.61e-06	1.56e-06	8.13e-06	4.22e-06	3.97e-06	1.49e-06	3.76e-06	5.85e-06
s__Bacteroidetes_bacterium_38_7	2.1e-05	2.86e-05	2.73e-05	2.49e-05	1.79e-05	2.54e-05	2.29e-05	1.91e-05	1.83e-05	2.49e-05	2.02e-05	1.88e-05	2.79e-05	1.6e-05	2.01e-05
s__Bosea_sp_Root381	9.24e-07	5.32e-07	8.56e-07	7.58e-07	7.8e-07	6.99e-07	7.1e-07	7.48e-07	1.13e-06	1.21e-06	9.16e-07	7.81e-07	3.54e-07	4.4e-07	7.73e-07
s__Micromonospora_narathiwatensis	1.97e-07	8.51e-08	6.75e-08	2.19e-07	2.52e-07	8.06e-08	3.43e-07	4.08e-07	2.02e-07	3.02e-07	2.65e-07	2.67e-07	5.05e-07	3.18e-07	3.63e-07
s__Geobacillus_sp_ZGt-1	0	0	0	3.99e-08	1.61e-07	2.69e-08	0	2.27e-08	7.56e-08	2.52e-08	0	0	0	2.44e-08	7.25e-08
s__Bacillus_mojavensis	8.85e-07	7.87e-07	1.13e-06	1.02e-06	6.88e-07	5.91e-07	1.1e-06	7.26e-07	1.06e-06	9.06e-07	1.01e-06	8.63e-07	6.06e-07	1.88e-06	8.7e-07
s__uncultured_delta_proteobacterium_Rifle_16ft_4_minimus_11275	0	0	0	1.99e-08	0	0	0	0	0	0	2.41e-08	0	2.53e-08	2.44e-08	0
s__candidate_division_WWE3_bacterium_GW2011_GWE2_42_25	0	0	0	0	0	2.69e-08	0	0	0	0	0	0	0	0	0
s__Bacteroides_clarus_CAG160	0.000346199	0.00036886	0.000327659	0.000273891	0.000309247	0.000360514	0.000292119	0.000366374	0.000325368	0.000308683	0.000241892	0.000342737	0.000362189	0.000202668	0.00032119
s__Pseudatteria_volcanica	0	0	0	0	0	0	0	0	2.52e-08	0	0	0	0	0	0
s__Parcubacteria_group_bacterium_GW2011_GWA1_50_14	7.86e-08	0	1.58e-07	0	0	5.38e-08	2.52e-07	2.27e-08	0	1.26e-07	2.41e-08	1.23e-07	0	4.89e-08	7.25e-08
s__Meiothermus_timidus	6.49e-07	3.4e-07	2.48e-07	2.59e-07	2.52e-07	1.34e-07	4.12e-07	1.59e-07	1.51e-07	2.27e-07	2.65e-07	1.44e-07	5.05e-08	1.71e-07	3.14e-07
s__Shinella_sp_HZN7	2.95e-07	8.51e-08	2.03e-07	2.79e-07	2.29e-07	2.42e-07	2.06e-07	2.04e-07	1.26e-07	1.51e-07	2.41e-07	2.47e-07	2.27e-07	7.33e-08	2.9e-07
s__uncultured_marine_group_II/III_euryarchaeote_KM3_141_A08	0	6.38e-08	2.25e-08	3.99e-08	6.88e-08	2.69e-08	0	0	2.52e-08	0	0	2.05e-08	2.53e-08	0	2.42e-08
s__Ignatzschineria_larvae	2.08e-06	1.91e-06	2.25e-06	1.74e-06	2.52e-06	1.29e-06	2.54e-06	2.04e-06	1.79e-06	2.77e-06	1.54e-06	1.19e-06	2.86e-06	1.78e-06	2.34e-06
s__Stenotrophomonas_daejeonensis	7.67e-07	1.62e-06	1.1e-06	1.52e-06	5.5e-07	1.37e-06	8.24e-07	7.26e-07	3.53e-07	8.31e-07	1.08e-06	6.78e-07	1.29e-06	4.89e-07	1.47e-06
s__Chitinivibrio_alkaliphilus	3.11e-06	2.36e-06	3.31e-06	3.17e-06	3.46e-06	5.97e-06	3.27e-06	7.39e-06	6.98e-06	1.96e-06	2.24e-06	7.09e-06	3.69e-06	4.23e-06	6.16e-06
s__Mycobacterium_phage_Saal	0	0	0	0	0	0	0	0	0	0	0	0	0	0	0
s__Histoplasma_capsulatum	7.86e-08	0	0	0	2.29e-08	2.69e-08	9.16e-08	1.36e-07	0	2.52e-08	2.41e-08	1.23e-07	5.05e-08	2.2e-07	2.42e-08
s__Acidovorax_sp_Leaf84	1.97e-08	2.13e-08	0	0	0	2.69e-08	0	0	0	0	2.41e-08	0	0	0	0
s__Stachybotrys_chlorohalonata	3.54e-07	4.25e-08	1.13e-07	1.6e-07	2.75e-07	1.34e-07	4.58e-08	0	1.01e-07	1.51e-07	1.69e-07	0	1.01e-07	4.89e-08	0
s__Pectobacterium_betavasculorum	8.45e-07	4.47e-07	7.88e-07	4.79e-07	1.38e-06	2.42e-07	6.87e-07	3.18e-07	4.54e-07	5.54e-07	6.75e-07	3.7e-07	3.29e-07	5.87e-07	1.69e-07
s__Thermoplasmatales_archaeon_BRNA1	2.26e-06	3.64e-06	1.35e-06	3.77e-06	2.55e-06	3.31e-06	4.65e-06	3.4e-06	3.6e-06	4.3e-06	3.88e-06	2.88e-06	2.68e-06	4.96e-06	4.21e-06
s__Trichoplax_adhaerens	7.27e-07	2.34e-07	6.75e-07	7.78e-07	7.34e-07	4.57e-07	7.33e-07	3.18e-07	7.31e-07	6.8e-07	3.37e-07	2.67e-07	3.29e-07	5.38e-07	4.11e-07
s__Clostridium_akagii	8.12e-06	6.83e-06	6.06e-06	1.98e-05	1.05e-05	1.07e-05	1.14e-05	1.56e-05	1.41e-05	7.4e-06	2.29e-05	1.34e-05	1.02e-05	1.69e-05	1.68e-05
s__Cryptomeria_japonica	0	0	0	0	0	0	0	0	0	0	0	0	0	0	0
s__Chrysomya_megacephala	0	0	0	0	0	2.69e-08	0	0	0	0	0	0	0	0	0
s__Pseudogymnoascus_sp_VKM_F-4246	5.9e-08	0	2.25e-08	1.8e-07	4.59e-08	2.69e-08	9.16e-08	0	5.04e-08	0	0	4.11e-08	0	2.44e-08	1.21e-07
s__Rhodococcus_sp_AD45	1.97e-08	0	2.25e-08	1.2e-07	9.17e-08	8.06e-08	0	1.13e-07	1.01e-07	1.01e-07	7.23e-08	2.05e-08	5.05e-08	2.44e-08	1.93e-07
s__uncultured_virus	3.93e-08	1.06e-07	4.5e-08	3.99e-08	4.59e-08	0	9.16e-08	2.27e-08	0	2.52e-08	2.41e-08	6.16e-08	0	2.44e-08	0
s__Ruegeria_lacuscaerulensis	4.33e-07	2.98e-07	2.25e-07	3.39e-07	2.52e-07	1.34e-07	5.27e-07	6.8e-07	2.52e-07	2.01e-07	1.69e-07	2.26e-07	1.77e-07	1.71e-07	2.18e-07
s__Bifidobacterium_sp_Hma3N	0	0	0	0	2.29e-08	2.96e-07	0	0	0	5.03e-08	4.82e-08	1.03e-07	7.58e-08	4.89e-08	0
s__Alicycliphilus_sp_B1	6.49e-07	1.3e-06	6.75e-08	8.58e-07	4.36e-07	1.08e-06	1.14e-07	6.12e-07	3.02e-07	1.64e-06	7.47e-07	1.23e-07	1.79e-06	5.62e-07	9.18e-07
s__Lachnospiraceae_bacterium_A4	0.010755	0.00509622	0.00311732	0.0106918	0.0231055	0.00116941	0.0059718	0.00119933	0.00908313	0.00494047	0.0282197	0.00571463	0.00661223	0.0495162	0.0125937
s__Moraxella_sp_O245	1.97e-08	0	0	0	2.52e-07	0	0	0	0	0	0	0	0	0	0
s__Candidatus_Woesebacteria_bacterium_GW2011_GWB1_44_11b	1.38e-07	0	1.8e-07	9.97e-08	4.59e-08	2.69e-07	0	2.27e-08	2.52e-08	0	7.23e-08	2.05e-08	0	1.71e-07	0
s__Corynebacterium_simulans	1.2e-06	1.7e-07	5.63e-07	2.79e-07	3.44e-07	1.88e-07	2.52e-07	5.9e-07	5.54e-07	2.77e-07	1.69e-07	2.47e-07	2.02e-07	3.42e-07	2.42e-07
s__Xenorhabdus_poinarii	0	1.91e-07	6.75e-08	1.8e-07	4.59e-08	1.08e-07	2.06e-07	2.49e-07	0	1.01e-07	1.93e-07	2.88e-07	1.01e-07	1.71e-07	1.21e-07
s__Persicobacter_sp_CCB-QB2	1.8e-05	1.9e-05	1.88e-05	1.75e-05	1.85e-05	2.05e-05	1.99e-05	2.09e-05	1.64e-05	1.91e-05	1.35e-05	1.63e-05	1.8e-05	1.15e-05	1.65e-05
s__Halomonas_halocynthiae	7.67e-07	2.34e-07	5.4e-07	6.18e-07	3.21e-07	5.64e-07	4.35e-07	1.34e-06	7.56e-08	4.78e-07	2.65e-07	3.29e-07	5.31e-07	4.16e-07	3.87e-07
s__Thermoanaerobacter_sp_X561	0	0	0	0	2.29e-08	0	0	0	0	0	0	0	1.01e-07	1.47e-07	0
s__Amycolatopsis_halophila	9.83e-08	1.28e-07	0	0	1.38e-07	5.38e-08	6.87e-08	1.13e-07	1.26e-07	2.52e-08	9.64e-08	4.11e-08	5.05e-08	1.22e-07	1.69e-07
s__Parcubacteria_group_bacterium_GW2011_GWA1_44_13	0	0	0	0	0	0	0	0	0	0	2.41e-08	0	0	0	0
s__Burkholderia_sp_WSM2232	1.97e-08	0	6.75e-08	1.99e-08	4.59e-08	0	0	2.27e-08	2.52e-08	7.55e-08	2.41e-08	0	2.53e-08	9.78e-08	2.42e-08
s__Kandleria_vitulina	2.69e-05	2.54e-05	2.34e-05	4.15e-05	1.94e-05	5.05e-05	1.58e-05	5.42e-05	4.51e-05	3.1e-05	3.8e-05	4.38e-05	2.53e-05	4.93e-05	3.7e-05
s__Streptococcus_gallolyticus	1.46e-05	8.17e-06	1.2e-05	1.57e-05	8.55e-06	5.88e-05	8.54e-06	5.62e-05	5.46e-05	2.44e-05	2.89e-05	3.88e-05	1.3e-05	2.92e-05	3.63e-05
s__Bacteroides_uniformis	0.00971446	0.00922471	0.00738408	0.00603672	0.00810274	0.00878283	0.00608773	0.00875012	0.00803041	0.00780452	0.00630907	0.00814553	0.0102901	0.00532893	0.00863157
s__Mesorhizobium_sp_LNJC403B00	1.97e-08	2.13e-08	0	1.99e-08	0	0	0	0	0	0	0	0	2.53e-08	0	0
s__Vibrio_sp_J2-8	1.97e-08	2.98e-07	6.75e-08	1.2e-07	2.52e-07	0	1.14e-07	0	0	2.52e-08	0	2.05e-08	0	0	0
s__Wolbachia_endosymbiont_of_Drosophila_suzukii	1.18e-07	6.38e-08	1.58e-07	0	4.59e-08	5.38e-08	1.03e-06	5.9e-07	2.52e-08	3.88e-06	3.4e-06	0	2.53e-08	3.42e-07	1.06e-06
s__uncultured_bacterium_SRF2	4.72e-06	4.32e-06	6.01e-06	4.49e-06	5.25e-06	8.84e-06	6.69e-06	6.65e-06	7.76e-06	4.23e-06	4.7e-06	1e-05	8.01e-06	2.88e-06	6.53e-06
s__Lactobacillus_virus_Ld17	1.77e-07	4.25e-08	2.7e-07	3.99e-07	9.17e-08	1.34e-07	1.83e-07	3.63e-07	2.52e-07	5.03e-08	1.21e-07	1.44e-07	1.01e-07	1.03e-06	2.42e-08
s__Sphingomonas_sp_STIS62	3.93e-08	2.13e-08	4.5e-08	1.99e-08	0	0	2.29e-08	0	0	2.52e-08	0	4.11e-08	2.53e-08	2.44e-08	4.83e-08
s__Pseudocercospora_fijiensis	7.86e-08	2.13e-08	6.75e-08	1.99e-08	4.59e-08	1.08e-07	1.14e-07	2.49e-07	5.04e-08	1.26e-07	2.41e-08	0	2.53e-08	2.44e-08	4.83e-08
s__Micromonospora_aurantiaca	2.56e-07	1.7e-07	2.93e-07	2.79e-07	3.67e-07	1.88e-07	5.72e-07	1.13e-07	1.76e-07	2.77e-07	2.65e-07	1.85e-07	7.58e-08	1.71e-07	2.42e-07
s__Helicobacter_cynogastricus	0	0	0	0	0	0	0	0	0	0	0	2.05e-08	0	0	0
s__Pseudomonas_sp_Y2	0	0	0	0	0	0	0	0	0	0	0	2.05e-08	0	0	0
s__Salmonella_phage_7-11	0	0	0	0	0	0	2.29e-07	0	0	2.52e-08	0	0	2.53e-08	0	0
s__Blautia_schinkii	0.00016901	0.000137437	0.000126714	0.000543273	0.000236464	0.000104859	0.000254359	0.000145706	0.000282659	0.000109858	0.000440255	0.000207475	0.000172743	0.00055689	0.000420696
s__Pseudohongiella_spirulinae	2.87e-06	2.23e-06	2.03e-06	1.44e-06	3.32e-06	3.95e-06	2.13e-06	3.49e-06	2.9e-06	2.11e-06	1.74e-06	3.57e-06	2.2e-06	1.86e-06	3.17e-06
s__Pseudovibrio_sp_W74	0	0	0	1.6e-07	6.88e-08	2.69e-08	0	0	0	0	2.41e-08	0	0	2.44e-08	0
s__Gordonia_bronchialis	1.97e-08	2.76e-07	9.01e-08	1.2e-07	3.44e-07	5.38e-08	1.83e-07	1.02e-06	6.3e-07	5.03e-08	4.82e-07	6.16e-08	1.77e-07	1.71e-07	7.98e-07
s__Gordonia_terrae	3.34e-07	3.19e-07	1.35e-07	2.39e-07	6.88e-08	1.24e-06	2.52e-07	1.43e-06	1.44e-06	6.29e-07	7.23e-07	8.63e-07	5.31e-07	9.04e-07	9.18e-07
s__uncultured_marine_crenarchaeote_HF4000_APKG2O16	0	6.38e-08	0	0	0	0	2.29e-08	0	2.52e-08	5.03e-08	2.41e-08	0	2.53e-08	0	0
s__Pelomonas_sp_Root1237	2.91e-06	1.23e-06	1.96e-06	1.8e-06	1.97e-06	5.51e-06	1.49e-06	4.72e-06	6.02e-06	2.44e-06	2.15e-06	7.13e-06	2.6e-06	2.03e-06	3.26e-06
s__Zymobacter_palmae	5.5e-07	5.74e-07	6.98e-07	5.39e-07	1.83e-06	7.26e-07	1.44e-06	4.54e-07	5.29e-07	5.54e-07	4.58e-07	2.67e-07	5.31e-07	4.16e-07	4.35e-07
s__Streptomyces_ahygroscopicus	1.97e-08	0	0	7.98e-08	0	0	0	2.27e-08	2.52e-08	0	2.41e-08	2.05e-08	0	7.33e-08	2.42e-08
s__Pseudogymnoascus_sp_VKM_F-4514_FW-929	0	0	0	0	0	0	0	0	0	0	4.82e-08	0	0	0	0
s__Cellulophaga_phage_phi381	0	0	2.25e-08	0	2.29e-08	0	0	4.54e-08	0	0	2.41e-08	1.03e-07	0	0	0
s__Mitsuaria_sp_7	1.26e-06	9.57e-07	1.58e-07	5.19e-07	5.04e-07	1.13e-06	2.75e-07	1.2e-06	8.57e-07	8.81e-07	3.62e-07	1.42e-06	1.06e-06	3.91e-07	1.31e-06
s__uncultured_bacterium_fosmid_pJB84G2	3.74e-07	2.13e-07	0	3.99e-08	0	0	2.29e-08	6.8e-08	0	2.52e-08	4.82e-08	2.67e-07	0	0	0
s__Afipia_felis	1.61e-06	1.04e-06	1.58e-06	1.6e-06	2.25e-06	6.18e-07	9.85e-07	9.3e-07	1.29e-06	2.59e-06	1.57e-06	9.66e-07	5.05e-07	9.53e-07	7.98e-07
s__Selenomonas_sp_oral_taxon_892	4.95e-06	5.47e-06	5.43e-06	9.63e-06	6.17e-06	4.38e-06	1.09e-05	4.42e-06	6.7e-06	4.78e-06	7.3e-06	4.89e-06	5.91e-06	7.55e-06	5.29e-06
s__Silvibacterium_bohemicum	2.22e-06	1.28e-06	1.6e-06	7.38e-07	1.28e-06	1.1e-06	1.49e-06	1.16e-06	1.86e-06	1.66e-06	1.23e-06	1.48e-06	7.33e-07	1.56e-06	8.22e-07
s__Arsukibacterium_sp_MJ3	6.68e-07	7.02e-07	6.98e-07	1.22e-06	5.73e-07	1.24e-06	1.08e-06	2.93e-06	1.08e-06	1.16e-06	8.68e-07	1.05e-06	1.57e-06	5.13e-07	5.32e-07
s__Rhodovulum_sulfidophilum	4.36e-06	1.66e-06	4.55e-06	4.01e-06	3.3e-06	2.5e-06	3.71e-06	4.6e-06	4.56e-06	4.33e-06	2.6e-06	3.78e-06	3.03e-06	3.13e-06	3.82e-06
s__Nitrosospira_briensis	6.49e-07	7.44e-07	3.15e-07	8.38e-07	3.21e-07	8.6e-07	3.89e-07	1.2e-06	9.07e-07	6.8e-07	5.06e-07	1.11e-06	1.06e-06	8.8e-07	1.79e-06
s__Yellowstone_Lake_virophage_5	0	0	0	0	0	0	0	0	0	0	0	0	0	0	0
s__Pestalotiopsis_fici	1.57e-07	1.49e-07	2.7e-07	3.39e-07	2.29e-08	8.06e-08	4.58e-08	2.27e-08	1.26e-07	1.76e-07	4.82e-08	4.11e-08	0	9.78e-08	2.42e-08
s__Mus_musculus_castaneus	3.93e-08	0	0	0	2.29e-08	5.38e-08	9.16e-08	6.8e-08	2.52e-08	1.51e-07	0	4.11e-08	0	0	2.42e-08
s__Staphylococcus_sp_HGB0015	3.93e-08	2.13e-08	6.75e-08	3.99e-08	1.61e-07	0	4.58e-08	9.07e-08	0	2.52e-08	4.82e-08	8.22e-08	0	4.89e-08	4.83e-08
s__Neorickettsia_risticii	3.93e-08	0	0	1.99e-08	0	0	2.29e-08	0	2.52e-08	0	0	2.05e-08	2.53e-08	4.89e-08	0
s__Actinobacteria_bacterium_BACL2_MAG-120920-bin34	0	0	0	0	0	0	0	0	0	0	0	0	0	0	2.42e-08
s__Enterococcus_sp_TR	7.67e-07	8.29e-07	1.8e-07	1.2e-06	8.26e-07	1.32e-06	9.39e-07	8.17e-07	9.83e-07	3.78e-07	1.11e-06	7.6e-07	6.06e-07	1.66e-06	8.94e-07
s__Streptomyces_sp_NRRL_S-475	3.93e-08	6.38e-08	6.75e-08	1.99e-08	1.15e-07	5.38e-08	6.87e-08	4.54e-08	7.56e-08	1.26e-07	0	2.05e-08	2.53e-08	2.44e-08	6.04e-07
s__uncultured_bacterium_162	0	0	2.25e-08	0	0	0	0	0	0	0	0	0	2.53e-08	0	0
s__Parabacteroides_johnsonii	0.000886905	0.00188122	0.000956478	0.000781202	0.000759221	0.00162247	0.000834176	0.000989003	0.000831851	0.00096501	0.000732689	0.000857121	0.00111586	0.000881608	0.000976041
s__Streptomyces_sp_CCM_MD2014	1.38e-07	1.7e-07	9.01e-08	9.97e-08	2.75e-07	1.88e-07	9.16e-08	1.36e-07	7.56e-08	1.76e-07	2.41e-08	1.64e-07	1.01e-07	1.22e-07	9.67e-08
s__Caldibacillus_debilis	5.9e-06	3.62e-06	5.47e-06	5.88e-06	3.71e-06	4.73e-06	3.18e-06	4.6e-06	5.54e-06	6.32e-06	4.99e-06	3.64e-06	7.45e-06	5.4e-06	4.45e-06
s__uncultured_proteobacterium_Rifle_16ft_4_minimus_11209	0	0	0	0	0	0	0	2.27e-08	0	0	2.41e-08	0	0	0	0
s__Faecalicatena_fissicatena	2.36e-05	1.64e-05	9.37e-06	4.51e-05	2.93e-05	1.19e-05	3.56e-05	1.76e-05	2.65e-05	1.7e-05	5.27e-05	2.67e-05	1.93e-05	5.19e-05	4.81e-05
s__Brevibacillus_panacihumi	2.71e-06	2.21e-06	2.81e-06	3.73e-06	2.5e-06	3.09e-06	2.89e-06	3.52e-06	3.43e-06	2.49e-06	3.04e-06	2.77e-06	2.05e-06	4.28e-06	3.5e-06
s__Candidatus_Collierbacteria_bacterium_GW2011_GWF2_44_15	0	0	0	0	0	0	0	0	0	0	0	0	0	2.44e-08	0
s__Sphingobium_sp_C100	5.5e-07	2.98e-07	4.5e-08	5.98e-08	3.21e-07	1.16e-06	2.75e-07	1.34e-06	1.36e-06	1.01e-07	3.13e-07	1.19e-06	2.27e-07	4.16e-07	6.53e-07
s__Geoalkalibacter_subterraneus	4.36e-06	3.45e-06	2.93e-06	3.65e-06	2.89e-06	3.6e-06	4.56e-06	4.29e-06	4.94e-06	2.89e-06	2.6e-06	3.74e-06	6.17e-06	3.74e-06	4.16e-06
s__Corynebacterium_sp_CMW7794	1.77e-07	1.28e-07	3.38e-07	1.6e-07	2.52e-07	5.38e-08	2.29e-07	1.13e-07	7.56e-08	1.26e-07	4.82e-08	3.29e-07	5.05e-08	9.78e-08	7.25e-08
s__Capnocytophaga_cynodegmi	5.01e-05	5.98e-05	5.04e-05	4.79e-05	4.13e-05	4.8e-05	5.48e-05	3.54e-05	3.61e-05	5.32e-05	3.89e-05	4.01e-05	6.81e-05	3.19e-05	4.35e-05
s__Winogradskyella_sp_PG-2	2.6e-06	1.7e-06	4.12e-06	1.89e-06	2.8e-06	1.83e-06	3.16e-06	1.61e-06	2.29e-06	2.84e-06	1.25e-06	1.77e-06	2.38e-06	1.59e-06	1.81e-06
s__Acinetobacter_sp_NIPH_713	3.93e-08	8.51e-08	1.13e-07	1.4e-07	3.67e-07	0	1.6e-07	0	1.26e-07	1.01e-07	1.93e-07	0	0	0	2.42e-08
s__Streptomyces_griseoruber	1.57e-07	8.51e-08	1.8e-07	1.6e-07	2.52e-07	1.61e-07	6.87e-08	1.13e-07	1.26e-07	2.01e-07	7.23e-08	1.85e-07	1.52e-07	3.18e-07	2.18e-07
s__Lactobacillus_oryzae	1.55e-06	4.04e-07	2.45e-06	7.38e-07	1.15e-06	9.41e-07	2.95e-06	1.32e-06	1.01e-06	1.56e-06	7.71e-07	7.6e-07	6.32e-07	1.52e-06	6.77e-07
s__Lactobacillus_virus_c5	7.86e-08	4.25e-08	7.66e-07	2.99e-07	1.61e-07	4.57e-07	3.21e-07	6.12e-07	5.8e-07	2.52e-08	2.65e-07	2.26e-07	2.27e-07	3.18e-07	1.93e-07
s__Phacotus_lenticularis	0	0	0	0	0	0	0	2.27e-08	0	0	0	0	0	0	0
s__Pedobacter_sp_Hv1	1.51e-05	1.06e-05	1.47e-05	1.21e-05	1.38e-05	1.23e-05	1.54e-05	1.27e-05	1.41e-05	1.72e-05	1.13e-05	1.31e-05	1.42e-05	9.83e-06	1.3e-05
s__Citrobacter_sedlakii	1.18e-07	0	0	3.19e-07	3.9e-07	5.38e-08	1.83e-07	6.8e-08	5.04e-08	7.55e-08	1.21e-07	6.16e-08	1.77e-07	2.44e-07	1.45e-07
s__Methanobrevibacter_cuticularis	1.53e-06	5.53e-07	7.88e-07	1.52e-06	7.34e-07	2.58e-06	1.26e-06	4.06e-06	2.27e-06	1.01e-06	2.12e-06	1.87e-06	1.34e-06	2.03e-06	7.73e-07
s__Streptomyces_cinnamoneus	0	0	2.25e-08	0	0	0	0	0	0	0	0	0	0	0	0
s__Escherichia_virus_phiV10	0	0	0	0	0	0	0	0	0	0	2.41e-08	0	0	0	0
s__Planctomycetaceae_bacterium_SCGC_AG-212-D15	5.9e-08	1.06e-07	2.25e-08	1.4e-07	2.75e-07	2.69e-08	1.37e-07	1.36e-07	1.51e-07	1.26e-07	9.64e-08	8.22e-08	1.01e-07	7.33e-08	2.18e-07
s__Mephitis_mephitis	0	0	0	0	0	0	0	0	0	0	0	0	0	2.44e-08	0
s__Eurypyga_helias	0	0	0	0	0	0	0	4.54e-08	7.56e-08	0	2.41e-08	0	0	0	4.83e-08
s__Micromonospora_sp_NRRL_B-16802	7.86e-08	8.51e-08	1.58e-07	1.8e-07	1.83e-07	1.08e-07	2.75e-07	1.13e-07	1.01e-07	0	2.41e-08	8.22e-08	1.01e-07	2.44e-08	9.67e-08
s__Candidatus_Levybacteria_bacterium_GW2011_GWA1_39_11	3.93e-08	4.25e-08	2.25e-07	1.2e-07	2.98e-07	1.34e-07	4.12e-07	6.8e-08	1.26e-07	5.03e-08	1.69e-07	1.64e-07	7.58e-08	2.2e-07	2.42e-08
s__Candidatus_Contendobacter_odensis	6.29e-07	1.06e-06	4.73e-07	1.02e-06	8.48e-07	9.14e-07	1.26e-06	7.71e-07	5.8e-07	1.08e-06	1.11e-06	8.83e-07	1.06e-06	1.37e-06	1.23e-06
s__Desulfovibrio_sp_3_1_syn3	2.92e-05	1.1e-05	2.51e-05	0.000131779	7.23e-05	2.07e-05	4.13e-05	4.56e-05	0.000109657	1.54e-05	0.000107641	6.04e-05	3.88e-05	0.000271356	6.83e-05
s__Aliivibrio_salmonicida	6.49e-07	1.72e-06	2.03e-07	8.98e-07	2.29e-08	1.64e-06	2.29e-08	7.71e-07	4.28e-07	1.28e-06	1.16e-06	1.44e-07	2.27e-06	7.82e-07	1.35e-06
s__Gregarina_niphandrodes	1.57e-07	1.55e-06	4.73e-07	3.59e-07	2.75e-07	5.38e-07	2.29e-07	2.27e-07	2.27e-07	4.28e-07	1.93e-07	4.11e-07	1.01e-07	2.2e-07	1.93e-07
s__Listeria_fleischmannii_subsp_fleischmannii	6.49e-07	6.81e-07	2.7e-07	5.39e-07	2.06e-07	1.08e-06	1.19e-06	4.99e-07	5.04e-07	8.81e-07	1.06e-06	3.49e-07	1.34e-06	1.05e-06	6.53e-07
s__Lactococcus_piscium	1.4e-06	7.02e-07	3.2e-06	3.17e-06	1.65e-06	8.87e-07	2.08e-06	1.68e-06	1.81e-06	9.31e-07	1.88e-06	9.86e-07	1.36e-06	2.62e-06	1.33e-06
s__Candidatus_Daviesbacteria_bacterium_GW2011_GWA1_41_61	0	0	0	0	0	0	0	0	2.52e-08	0	0	0	0	0	0
s__Porticoccus_hydrocarbonoclasticus	9.63e-07	6.81e-07	5.18e-07	3.19e-07	1.51e-06	5.91e-07	1.35e-06	7.71e-07	1.13e-06	1.08e-06	4.34e-07	4.11e-07	1.16e-06	7.82e-07	6.53e-07
s__Dokdonella_koreensis	9.83e-07	5.32e-07	9.68e-07	5.19e-07	8.26e-07	1.8e-06	9.85e-07	9.53e-07	1.11e-06	9.06e-07	1.69e-07	1.17e-06	6.57e-07	5.13e-07	1.93e-07
s__Methylomonas_sp_11b	9.63e-07	1.08e-06	4.5e-07	1.42e-06	6.88e-07	6.72e-07	1.37e-06	9.53e-07	1.39e-06	1.03e-06	7.95e-07	5.75e-07	1.31e-06	1.34e-06	8.46e-07
s__Pseudomonas_sp_URMO17WK12I8	0	0	0	0	0	0	0	5.9e-07	0	0	0	0	0	0	0
s__Vitrella_brassicaformis	4.13e-07	4.04e-07	1.8e-07	1.8e-07	2.29e-07	4.03e-07	2.52e-07	1.81e-07	4.28e-07	2.52e-07	3.37e-07	1.64e-07	1.77e-07	2.2e-07	3.38e-07
s__Shuttleworthia_sp_MSX8B	9.5e-06	1.02e-05	6.71e-06	1.84e-05	1.53e-05	5.19e-06	1.03e-05	5.99e-06	1.58e-05	7.37e-06	1.23e-05	7.25e-06	7.4e-06	2.62e-05	1.89e-05
s__Streptococcus_henryi	4.05e-06	1.47e-06	2.25e-06	6.24e-06	3.32e-06	1.19e-05	3.39e-06	1.06e-05	9.9e-06	4.45e-06	1.37e-05	8.51e-06	2.58e-06	7.55e-06	7.18e-06
s__Francisella_sp_FSC1006	7.67e-07	1.87e-06	1.1e-06	1.82e-06	4.59e-07	1.48e-06	1.01e-06	1.2e-06	6.3e-07	1.08e-06	1.71e-06	1.36e-06	2.2e-06	1.42e-06	1.28e-06
s__Flavihumibacter_sp_ZG627	1.5e-05	1.07e-05	1.29e-05	9.43e-06	1.73e-05	9.49e-06	1.6e-05	1.31e-05	1.07e-05	1.54e-05	8.77e-06	8.01e-06	1.27e-05	8.73e-06	9.76e-06
s__Amycolatopsis_sp_ATCC_39116	1.97e-07	1.7e-07	2.25e-08	2.39e-07	2.06e-07	2.69e-07	2.06e-07	1.81e-07	1.76e-07	2.52e-08	2.41e-07	1.64e-07	1.01e-07	2.2e-07	9.67e-08
s__Octadecabacter_antarcticus	3.93e-07	8.51e-08	1.13e-07	1.99e-07	1.15e-07	6.45e-07	1.14e-07	9.53e-07	4.03e-07	3.27e-07	4.34e-07	5.96e-07	1.52e-07	5.62e-07	4.35e-07
s__Bartonella_tamiae	5.7e-07	3.4e-07	5.63e-07	4.59e-07	5.96e-07	9.95e-07	5.27e-07	4.99e-07	5.04e-07	7.05e-07	6.75e-07	5.55e-07	1.77e-07	4.64e-07	5.32e-07
s__Kiloniella_spongiae	3.15e-07	8.51e-08	3.83e-07	9.77e-07	1.61e-07	1.88e-07	9.16e-08	5.9e-07	5.8e-07	2.52e-07	3.62e-07	2.47e-07	2.53e-07	4.64e-07	4.83e-08
s__uncultured_Spirosoma_sp	5.5e-07	3.62e-07	1.17e-06	3.99e-07	1.38e-07	9.95e-07	1.9e-06	1.29e-06	1.69e-06	7.3e-07	2.41e-07	1.5e-06	3.79e-07	7.09e-07	6.04e-07
s__Arthrobacter_sp_Leaf145	2.36e-07	6.38e-08	9.01e-08	7.98e-08	9.17e-08	1.34e-07	9.16e-08	4.54e-08	1.51e-07	7.55e-08	1.45e-07	4.11e-08	3.79e-07	3.67e-07	1.93e-07
s__Cupriavidus_nantongensis	1.57e-07	2.13e-08	2.7e-07	1.6e-07	3.44e-07	1.34e-07	2.75e-07	4.54e-07	1.76e-07	4.53e-07	3.37e-07	6.16e-08	5.31e-07	4.89e-07	2.18e-07
s__Planktothrix_agardhii	1.81e-06	1.06e-06	2.77e-06	1.95e-06	2.02e-06	1.32e-06	2.68e-06	1.22e-06	1.76e-06	1.79e-06	2.58e-06	1.52e-06	8.59e-07	1.61e-06	1.26e-06
s__Persicobacter_sp_JZB09	1.67e-05	2.29e-05	2.05e-05	1.95e-05	1.82e-05	1.66e-05	1.49e-05	1.37e-05	1.1e-05	1.82e-05	1.36e-05	1.13e-05	2.21e-05	1.18e-05	1.46e-05
s__Molgula_oculata	0	0	0	0	0	0	0	0	0	0	0	0	0	0	0
s__Janthinobacterium_sp_Marseille	4.91e-07	4.89e-07	4.05e-07	6.98e-07	3.67e-07	6.99e-07	1.31e-06	1.59e-07	3.02e-07	8.81e-07	3.86e-07	5.14e-07	2.78e-07	1.96e-07	3.63e-07
s__Candidatus_Methylomirabilis_oxyfera	1.16e-06	8.72e-07	3.83e-07	7.78e-07	1.7e-06	1.18e-06	1.44e-06	5.28e-06	1.56e-06	1.43e-06	7.95e-07	9.24e-07	1.14e-06	1.1e-06	1.4e-06
s__Nocardioides_sp_Root151	0	2.13e-08	0	7.98e-08	6.88e-08	0	2.29e-08	4.54e-08	5.04e-08	0	0	0	0	2.44e-08	2.42e-08
s__uncultured_archaeon_MedDCM-OCT-S04-C14	0	0	0	0	0	0	2.29e-08	0	0	0	2.41e-08	0	0	0	0
s__Ottowia_thiooxydans	3.54e-07	5.1e-07	2.03e-07	3.99e-07	2.29e-07	9.68e-07	6.87e-08	1.38e-06	4.79e-07	4.03e-07	2.41e-07	4.11e-07	3.03e-07	5.87e-07	2.9e-07
s__Aquimarina_atlantica	1.2e-05	1.39e-05	1.42e-05	1.13e-05	1.16e-05	1.26e-05	1.26e-05	1.11e-05	1.01e-05	1.5e-05	1.12e-05	9.53e-06	1.32e-05	8.82e-06	1.1e-05
s__Ruminococcus_sp_JC304	2.07e-05	1.7e-05	1.41e-05	6.72e-05	2.49e-05	2.39e-05	3.21e-05	2.74e-05	3.63e-05	1.71e-05	5.22e-05	3.38e-05	2.47e-05	6.79e-05	5.54e-05
s__Candidatus_Nomurabacteria_bacterium_GW2011_GWA1_36_15	0	2.13e-08	0	0	0	0	0	0	0	0	0	0	0	0	0
s__uncultured_actinobacterium_Rifle_16ft_4_minimus_550	0	0	0	3.99e-08	0	0	0	4.54e-08	2.52e-08	0	0	0	0	0	0
s__Pseudoalteromonas_sp_PAMC_22718	7.86e-08	2.13e-08	3.6e-07	1.6e-07	6.88e-08	2.69e-08	1.83e-07	8.85e-07	2.77e-07	1.76e-07	9.64e-08	3.7e-07	1.01e-07	0	0
s__Vibrio_phage_H188	0	0	0	0	0	0	0	0	5.04e-08	0	0	0	0	0	0
s__Neochlamydia_sp_S13	3.15e-07	6.38e-08	1.58e-07	2.39e-07	1.61e-07	1.34e-07	3.21e-07	3.63e-07	2.27e-07	2.27e-07	2.41e-07	5.96e-07	7.08e-07	2.2e-07	1.04e-06
s__Agromyces_cerinus_subsp_cerinus	0	0	0	0	0	0	0	2.27e-08	0	0	0	0	0	0	0
s__Pseudomonas_phage_phiPsa374	1.97e-08	1.28e-07	4.5e-08	1.4e-07	0	5.38e-08	3.66e-07	1.59e-07	2.52e-08	1.26e-07	7.23e-08	6.16e-08	1.77e-07	1.47e-07	1.21e-07
s__Mycoplasma_synoviae	5.11e-07	3.06e-06	6.75e-08	1.8e-07	9.17e-07	1.88e-07	7.1e-07	6.35e-07	5.04e-08	1.23e-06	1.69e-07	6.78e-07	7.58e-08	3.42e-07	0
s__Mycobacterium_virus_Bxz2	0	0	4.5e-08	0	0	0	0	0	0	0	0	0	0	0	0
s__Leucosolenia_sp_KP-2005	0	0	0	0	0	0	2.29e-08	0	0	0	0	0	0	0	0
s__Candidatus_Moranbacteria_bacterium_GW2011_GWC2_37_73	0	0	0	1.99e-08	0	0	0	0	0	0	0	0	0	0	0
s__Paracoccus_sp_228	2.36e-07	4.68e-07	2.93e-07	4.79e-07	7.57e-07	5.91e-07	3.89e-07	2.72e-07	5.04e-07	4.03e-07	7.47e-07	4.73e-07	7.33e-07	2.2e-07	2.9e-07
s__Enterococcus_rotai	1.28e-06	2.25e-06	8.78e-07	2.47e-06	1.03e-06	2.42e-06	1.1e-06	1.68e-06	1.11e-06	1.03e-06	1.71e-06	1.46e-06	1.92e-06	1.76e-06	1.45e-06
s__Pseudomonas_sp_GR_6-02	0	2.13e-08	2.25e-08	3.99e-08	4.59e-08	0	2.29e-08	0	0	0	0	2.05e-08	0	9.78e-08	2.42e-08
s__Pseudoalteromonas_sp_XI10	1.97e-08	4.25e-08	2.25e-08	0	2.29e-08	5.38e-08	6.87e-08	0	5.04e-08	2.52e-08	2.41e-08	2.05e-08	2.53e-08	7.33e-08	0
s__Streptomyces_gancidicus	1.18e-07	5.32e-07	3.38e-07	3.19e-07	9.17e-08	3.23e-07	1.6e-07	2.72e-07	2.52e-07	3.02e-07	3.62e-07	1.03e-07	4.8e-07	3.67e-07	3.14e-07
s__Bacillus_virus_Stahl	0	0	0	3.99e-08	2.29e-08	0	0	0	0	2.52e-08	0	0	0	0	0
s__Gordonia_sp_SGD-V-85	7.86e-08	1.91e-07	1.58e-07	5.98e-08	2.06e-07	0	1.6e-07	2.27e-08	1.26e-07	7.55e-08	9.64e-08	2.05e-07	1.26e-07	1.47e-07	7.25e-08
s__Halomonas_sp_TG39a	7.08e-07	0	2.25e-08	1.48e-06	1.26e-06	2.15e-07	2.29e-08	1.13e-07	7.56e-08	5.03e-08	6.03e-07	2.05e-08	1.01e-07	2.2e-07	2.66e-07
s__Tissierella_sp_AIP_28500	0	2.13e-08	0	0	2.29e-08	0	0	0	0	0	0	0	0	0	0
s__Vibrio_diazotrophicus	1.59e-06	5.96e-07	1.44e-06	1.5e-06	2.04e-06	1.26e-06	1.69e-06	1.54e-06	1.51e-06	1.03e-06	8.19e-07	9.66e-07	5.81e-07	9.78e-07	7.01e-07
s__Paracoccus_aestuarii	0	0	0	1.99e-08	2.29e-08	0	0	0	2.52e-08	0	2.41e-08	0	0	2.44e-08	2.42e-08
s__Desulfotignum_balticum	4.91e-06	6.72e-06	4.35e-06	9.47e-06	3.94e-06	5.99e-06	4.74e-06	5.72e-06	6.48e-06	4.45e-06	1.15e-05	6.98e-06	5.64e-06	5.67e-06	6.04e-06
s__Streptococcus_sp_I-G2	9.83e-08	4.25e-08	6.98e-07	2.39e-07	2.29e-08	4.84e-07	3.21e-07	7.03e-07	5.54e-07	2.01e-07	1.93e-07	4.11e-08	2.53e-08	1.71e-07	4.83e-08
s__Enteractinococcus_helveticum	9.83e-08	0	6.75e-08	0	6.88e-08	0	2.29e-08	2.04e-07	0	5.03e-08	0	0	0	2.44e-08	0
s__Saccharothrix_syringae	2.36e-07	1.06e-07	2.7e-07	3.99e-07	5.04e-07	8.06e-08	5.27e-07	2.04e-07	2.77e-07	4.03e-07	2.89e-07	2.05e-07	1.77e-07	4.4e-07	1.21e-07
s__Prochlorococcus_sp_scB245a_518J7	1.38e-07	0	0	0	0	8.06e-08	1.6e-07	0	2.52e-08	5.03e-08	0	0	7.58e-08	2.44e-08	1.69e-07
s__Halomonas_sp_R57-5	4.91e-07	0	6.75e-08	1.99e-08	7.11e-07	1.08e-07	1.37e-07	5.22e-07	2.52e-08	1.01e-07	2.65e-07	1.23e-07	2.53e-08	1.22e-07	6.53e-07
s__Arthrospira_sp_TJSD091	0	2.13e-08	4.5e-08	5.98e-08	2.29e-08	2.69e-08	2.29e-08	4.54e-08	1.01e-07	5.03e-08	0	6.16e-08	0	1.96e-07	1.93e-07
s__Streptomyces_sp_NRRL_F-5140	7.86e-08	2.13e-08	0	5.98e-08	2.29e-08	1.61e-07	1.14e-07	4.54e-08	5.04e-08	5.03e-08	7.23e-08	1.03e-07	2.53e-08	2.44e-08	1.21e-07
s__Mycoplasma_glycophilum	2.56e-07	1.17e-06	6.75e-08	5.98e-08	3.44e-07	1.34e-07	4.35e-07	2.49e-07	5.04e-08	2.77e-07	9.64e-08	1.64e-07	2.53e-08	2.44e-08	2.42e-08
s__Melissococcus_plutonius	1.83e-06	5.53e-07	1.37e-06	1.56e-06	1.42e-06	1.83e-06	1.08e-06	1.63e-06	2.17e-06	8.81e-07	2.05e-06	1.25e-06	1.42e-06	3.37e-06	1.38e-06
s__Artemisia_californica	0	0	0	0	0	0	0	0	2.52e-08	0	0	0	0	0	2.42e-08
s__Xenorhabdus_szentirmaii	4.72e-07	4.25e-08	2.25e-07	4.39e-07	1.74e-06	8.06e-08	8.7e-07	9.07e-08	6.05e-07	9.56e-07	1.69e-07	3.08e-07	4.3e-07	4.4e-07	6.53e-07
s__Thermodesulfatator_autotrophicus	1.34e-06	7.23e-07	9.01e-07	1.22e-06	4.59e-07	6.72e-07	1.63e-06	7.94e-07	1.11e-06	8.31e-07	7.71e-07	9.04e-07	8.84e-07	1.17e-06	1.06e-06
s__Desulfallas_gibsoniae	6.57e-06	5.3e-06	4.05e-06	8.8e-06	6.88e-06	3.58e-06	6.89e-06	4.31e-06	8.47e-06	5.13e-06	8e-06	6.96e-06	4.73e-06	1.35e-05	6.89e-06
s__Prevotella_nigrescens	0.000366369	0.000423244	0.000426252	0.000279196	0.000287577	0.000367503	0.000317925	0.000323029	0.000350842	0.000397576	0.000253774	0.000332712	0.000348443	0.00020961	0.000285322
s__Promicromonospora_kroppenstedtii	3.15e-07	4.25e-07	9.01e-08	3.39e-07	3.21e-07	4.3e-07	2.75e-07	2.27e-08	3.78e-07	1.51e-07	3.37e-07	1.85e-07	3.79e-07	1.32e-06	4.83e-07
s__Exiguobacterium_chiriqhucha	8.45e-07	7.44e-07	1.17e-06	1.91e-06	9.86e-07	5.64e-07	1.14e-06	9.53e-07	1.34e-06	4.78e-07	1.18e-06	6.37e-07	3.79e-07	2.22e-06	9.67e-07
s__Arthrobacter_sp_OY3WO11	9.83e-08	6.38e-08	9.01e-07	2.59e-07	3.67e-07	0	2.52e-07	2.27e-07	2.77e-07	7.55e-08	8.19e-07	3.9e-07	7.58e-08	1.96e-07	3.38e-07
s__Trichinella_patagoniensis	4.69e-05	1.01e-05	1.62e-05	9.65e-06	1.64e-05	1.37e-05	2.18e-05	7.14e-06	1.42e-05	2.1e-05	2.34e-05	1.32e-05	1.37e-05	1.19e-05	1.33e-05
s__uncultured_marine_crenarchaeote_HF4000_APKG6C9	0	0	0	0	0	0	2.29e-08	0	0	2.52e-08	0	0	0	0	0
s__Methylosinus_sp_LW4	6.88e-07	3.83e-07	2.48e-07	7.98e-07	6.42e-07	3.23e-07	3.43e-07	1.27e-06	7.06e-07	6.04e-07	3.37e-07	3.7e-07	4.04e-07	8.8e-07	7.73e-07
s__Paraburkholderia_caribensis	2.99e-06	1.32e-06	2.81e-06	1.58e-06	2.5e-06	1.64e-06	1.69e-06	1.09e-06	2.09e-06	2.74e-06	1.61e-06	1.58e-06	1.84e-06	1.52e-06	1.33e-06
s__Butyrivibrio_fibrisolvens	0.000253093	0.000172977	0.000165777	0.000596687	0.00036302	0.000172408	0.000286073	0.000222324	0.000330785	0.000196561	0.000627964	0.000271778	0.000223434	0.000505214	0.000427125
s__Pseudomonas_phage_OBP	0	0	0	5.98e-08	0	0	0	0	0	0	0	0	0	0	0
s__Parcubacteria_group_bacterium_GW2011_GWC2_39_11	0	0	0	0	0	1.08e-07	1.14e-07	0	0	0	7.23e-08	2.05e-08	0	9.78e-08	0
s__Trichoderma_atroviride	0	1.7e-07	2.25e-08	7.98e-08	0	2.69e-08	0	0	2.52e-08	0	3.37e-07	2.05e-08	2.53e-08	0	0
s__Streptococcus_anginosus_group	2.16e-07	1.7e-07	1.8e-07	1.2e-07	1.61e-07	2.69e-08	2.75e-07	6.8e-08	1.76e-07	7.55e-08	3.86e-07	6.16e-08	5.05e-08	5.87e-07	2.66e-07
s__Streptomyces_rangoonensis	0	0	2.25e-08	0	0	0	0	0	0	0	0	2.05e-08	0	0	0
s__Virgibacillus_senegalensis	2.08e-06	1.28e-06	1.24e-06	1.02e-06	1.38e-06	3.76e-06	1.56e-06	2.65e-06	3.05e-06	2.34e-06	2.65e-06	3.31e-06	2.5e-06	3.67e-06	4.5e-06
s__Natrialba_aegyptia	7.67e-07	1.91e-07	8.56e-07	3.19e-07	6.88e-07	3.49e-07	3.89e-07	1.59e-07	4.03e-07	9.06e-07	3.37e-07	5.14e-07	5.05e-07	3.67e-07	4.11e-07
s__Mesorhizobium_sp_Root102	0	2.13e-08	2.25e-08	5.98e-08	4.59e-08	2.69e-08	0	0	5.04e-08	5.03e-08	2.41e-08	0	0	4.89e-08	0
s__Aspergillus_luchuensis	0	0	0	0	0	0	0	0	0	0	0	0	0	2.44e-08	0
s__Mycobacterium_sp_141	1.18e-07	3.4e-07	1.13e-07	5.78e-07	4.59e-08	2.15e-07	3.21e-07	2.49e-07	7.56e-08	5.03e-08	3.62e-07	1.03e-07	4.3e-07	1.71e-07	2.66e-07
s__Bacillus_sp_5B6	0	2.13e-08	0	3.99e-08	0	0	0	0	0	0	4.82e-08	2.05e-08	0	0	0
s__Paenibacillus_pini	2.3e-06	3.49e-06	3.26e-06	4.73e-06	1.47e-06	2.18e-06	4.05e-06	2.72e-06	2.47e-06	2.49e-06	3.95e-06	2.69e-06	5.41e-06	4.82e-06	5.41e-06
s__Dianthus_caryophyllus	0	0	0	0	0	0	0	0	0	2.52e-08	0	0	0	0	0
s__Paenibacillus_sp_AD87	1.04e-06	4.68e-07	4.95e-07	1.87e-06	1.7e-06	5.11e-07	1.47e-06	6.8e-07	1.54e-06	5.29e-07	1.49e-06	8.22e-07	9.1e-07	2.64e-06	1.35e-06
s__Mycobacterium_sp_852002-51152_SCH6134967	1.57e-07	1.49e-07	2.03e-07	1.6e-07	6.88e-08	8.06e-08	4.58e-08	1.77e-06	1.26e-07	1.76e-07	1.93e-07	4.11e-08	3.54e-07	2.2e-07	1.45e-07
s__Sphingopyxis_sp_Root154	0	0	0	0	2.29e-08	0	0	0	2.52e-08	0	0	0	0	0	2.42e-08
s__Bacillus_sp_JCA	1.97e-08	6.38e-08	4.5e-08	0	0	2.69e-08	6.87e-08	0	2.52e-08	0	2.41e-08	6.16e-08	0	0	0
s__Burkholderia_sp_BDU18	5.9e-08	0	0	0	9.17e-08	0	0	0	0	0	0	2.05e-08	0	0	2.42e-08
s__Pseudomonas_rhodesiae	0	0	0	0	0	0	2.29e-08	0	2.52e-08	0	2.41e-08	0	0	2.44e-08	2.42e-08
s__Bifidobacterium_sp_7101	1.57e-07	1.91e-07	1.58e-07	7.98e-08	6.88e-08	5.38e-08	2.06e-07	5.9e-07	2.52e-07	5.03e-08	4.34e-07	3.08e-07	1.77e-07	4.4e-07	1.69e-07
s__SAR116_cluster_alpha_proteobacterium_HIMB100	9.83e-08	1.06e-07	9.01e-08	3.39e-07	2.75e-07	2.96e-07	1.83e-07	9.07e-08	2.02e-07	5.03e-08	1.69e-07	1.85e-07	2.53e-08	2.93e-07	1.69e-07
s__uncultured_bacterium_164	0	0	0	0	0	0	0	0	2.52e-08	0	0	0	0	0	0
s__Pseudomonas_sp_BRG-100	0	0	6.75e-08	0	0	0	2.29e-08	4.54e-08	0	2.52e-08	2.41e-08	0	0	2.44e-08	0
s__Acinetobacter_parvus	6.49e-07	4.68e-07	9.01e-07	9.17e-07	7.34e-07	2.96e-07	8.93e-07	9.53e-07	8.82e-07	9.06e-07	8.44e-07	7.19e-07	9.1e-07	6.6e-07	7.49e-07
s__Bacillus_sp_m3-13	8.65e-07	5.74e-07	9.23e-07	2.29e-06	1.03e-06	3.14e-06	5.95e-07	1.93e-06	2.77e-06	2.27e-07	1.01e-06	3.37e-06	5.31e-07	1.27e-06	7.01e-07
s__Actinomyces_meyeri	2.95e-07	2.13e-07	1.58e-07	8.38e-07	4.36e-07	4.57e-07	1.83e-07	8.85e-07	8.31e-07	2.52e-07	3.13e-07	4.52e-07	2.02e-07	6.6e-07	2.66e-07
s__uncultured_bacterium_To-T_020_P12	0	0	0	3.99e-08	0	0	0	4.54e-08	0	0	0	0	0	0	0
s__Bacillus_subtilis_subsp_spizizenii	2.56e-07	5.74e-07	1.35e-07	4.59e-07	2.75e-07	5.38e-08	1.83e-07	2.27e-08	4.03e-07	5.03e-08	3.37e-07	1.64e-07	1.01e-07	4.64e-07	1.69e-07
s__Rhodococcus_sp_YH3-3	0	0	0	1.99e-08	0	0	0	0	0	0	0	0	0	2.44e-08	0
s__Pseudorhodobacter_aquimaris	1.97e-07	6.38e-08	6.75e-08	2.19e-07	2.52e-07	1.34e-07	1.01e-06	0	5.04e-08	1.01e-07	9.64e-08	6.16e-08	1.52e-07	9.78e-08	0
s__uncultured_sulfate-reducing_bacterium	2.36e-07	2.13e-07	2.03e-07	1.36e-06	5.73e-07	1.61e-07	5.95e-07	2.95e-07	7.06e-07	1.51e-07	5.54e-07	5.96e-07	3.79e-07	2.32e-06	8.46e-07
s__Actinomyces_sp_oral_taxon_175	1.97e-08	6.38e-08	6.75e-08	1.99e-07	1.15e-07	2.69e-08	6.87e-08	2.27e-08	0	2.27e-07	9.64e-08	8.22e-08	2.53e-08	1.71e-07	0
s__Sphaerotilus_natans_subsp_natans	2.95e-07	1.7e-07	2.25e-08	3.99e-08	1.38e-07	2.69e-07	4.81e-07	9.07e-08	1.76e-07	1.76e-07	4.82e-08	1.85e-07	2.27e-07	1.71e-07	1.21e-07
s__uncultured_Collinsella_sp_SMG3	0	0	0	0	0	0	0	2.27e-08	0	0	0	0	0	2.44e-08	2.42e-08
s__Soehngenia_saccharolytica	0	0	0	0	0	0	0	0	0	0	0	0	0	0	0
s__Knoellia_subterranea	2.75e-07	2.34e-07	1.8e-07	1.99e-07	3.9e-07	4.84e-07	3.89e-07	3.18e-07	6.3e-07	3.02e-07	2.65e-07	3.08e-07	1.77e-07	3.67e-07	9.67e-08
s__Streptococcus_phage_5093	0	0	0	0	0	0	0	0	0	0	0	0	2.53e-08	0	0
s__Salmonella_enterica_subsp_diarizonae	1.18e-07	3.4e-07	2.7e-07	2.59e-07	0	2.42e-07	2.52e-07	2.27e-07	5.04e-08	2.01e-07	1.93e-07	1.23e-07	4.3e-07	2.93e-07	4.11e-07
s__candidate_division_Zixibacteria_bacterium_SM23_73_2	2.95e-07	1.7e-07	3.38e-07	2.59e-07	2.75e-07	1.34e-07	6.18e-07	4.08e-07	5.8e-07	1.51e-07	3.62e-07	3.49e-07	2.53e-07	3.42e-07	1.45e-07
s__Pseudomonas_sp_ICMP_3272	0	0	0	0	2.29e-08	2.69e-08	2.29e-08	0	0	0	7.23e-08	4.11e-08	0	2.44e-08	0
s__Anaerobiospirillum_succiniciproducens	4.91e-06	7.21e-06	5.25e-06	7.4e-06	4.65e-06	8.6e-06	3.94e-06	8.96e-06	7e-06	5.23e-06	5.42e-06	7.33e-06	7.28e-06	7.48e-06	8.89e-06
s__Zygosaccharomyces_rouxii	2.26e-06	1.83e-06	1.94e-06	8.58e-07	1.03e-06	4.03e-07	4.58e-07	5.9e-07	1.03e-06	1.23e-06	8.92e-07	1.6e-06	2.4e-06	3.91e-07	7.25e-07
s__Paracoccus_ferrooxidans	0	0	2.25e-08	0	2.29e-08	0	0	0	2.52e-08	2.52e-08	0	0	0	0	0
s__Thioalkalivibrio_sp_ARh3	3.74e-07	3.4e-07	5.18e-07	6.78e-07	6.88e-07	7.26e-07	5.04e-07	2.04e-07	6.05e-07	4.78e-07	3.86e-07	2.88e-07	3.29e-07	9.78e-08	3.87e-07
s__Gemmatimonas_sp_SG8_28	4.58e-06	1.45e-06	3.38e-06	1.99e-06	4.13e-06	2.74e-06	4.67e-06	3.88e-06	3.48e-06	5.26e-06	2.94e-06	3.45e-06	2.48e-06	3.2e-06	4.3e-06
s__Streptomyces_violaceorubidus	1.18e-07	6.38e-08	2.03e-07	3.99e-08	6.88e-08	8.06e-08	9.16e-08	9.07e-08	1.51e-07	2.52e-07	9.64e-08	1.23e-07	1.26e-07	7.33e-08	4.83e-08
s__Prevotella_ruminicola	0.00108771	0.00219325	0.00177192	0.0012934	0.00100117	0.00169274	0.00134411	0.00156745	0.00116417	0.00160928	0.00119497	0.00149779	0.00161122	0.000990458	0.00129184
s__uncultured_bacterium_r_08	0	0	2.25e-08	0	2.52e-07	0	0	2.27e-08	0	0	4.82e-08	2.05e-08	0	4.89e-08	0
s__Streptomyces_virus_Lannister	0	0	0	0	0	0	0	0	0	0	0	0	0	0	0
s__Methylomicrobium_buryatense	1.57e-07	2.34e-07	1.8e-07	9.97e-08	1.61e-07	1.34e-07	1.37e-07	2.27e-07	4.03e-07	1.01e-07	5.3e-07	3.9e-07	1.01e-07	9.29e-07	2.66e-07
s__Merops_nubicus	0	1.06e-07	0	3.99e-08	0	5.38e-08	2.29e-08	2.27e-08	2.52e-08	5.03e-08	2.41e-08	0	0	0	0
s__Olleya_sp_VCSM12	1.38e-07	6.38e-08	1.58e-07	1.6e-07	4.13e-07	1.29e-06	3.66e-07	5.9e-07	1.03e-06	1.01e-07	2.41e-07	9.24e-07	1.26e-07	1.71e-07	1.21e-07
s__Lactobacillus_murinus	0.000250812	0.00102976	0.0266348	0.00260041	0.01479	0.00033987	0.00602739	0.00213786	0.00778884	0.00222149	0.00283338	0.000258054	0.000463344	0.00184838	0.000265503
s__uncultured_Thermotoga_sp	0	2.13e-08	0	1.99e-08	0	0	4.58e-08	0	5.04e-08	0	9.64e-08	0	1.01e-07	2.44e-08	9.67e-08
s__Branchiostoma_belcheri	1.02e-06	2.76e-07	7.88e-07	1.6e-07	3.21e-07	5.91e-07	2.98e-07	1.13e-07	5.29e-07	7.3e-07	6.27e-07	5.14e-07	4.3e-07	5.13e-07	5.8e-07
s__Streptomyces_griseus_subsp_griseus	7.86e-08	8.51e-08	3.83e-07	5.98e-08	0	2.69e-08	3.43e-07	0	7.56e-08	3.02e-07	7.23e-08	4.11e-08	2.53e-08	1.47e-07	2.42e-08
s__Aminobacterium_mobile	2.24e-06	3.19e-06	2.45e-06	3.51e-06	2.52e-06	3.98e-06	1.97e-06	2.54e-06	3.98e-06	3.3e-06	3.52e-06	2.51e-06	3.44e-06	3.84e-06	3.14e-06
s__uncultured_Amycolatopsis_sp	1.97e-08	8.51e-08	0	0	0	2.69e-08	0	0	2.52e-08	0	0	0	0	0	0
s__Thermoplasmatales_archaeon_SG8-52-1	1.57e-07	1.7e-07	0	9.97e-08	2.06e-07	1.61e-07	1.6e-07	2.49e-07	7.56e-08	7.55e-08	2.65e-07	1.44e-07	2.53e-08	1.71e-07	1.45e-07
s__Pyrodictium_occultum	3.93e-08	0	0	7.98e-08	2.29e-08	0	2.29e-08	2.27e-08	2.52e-08	0	2.41e-08	0	2.53e-08	4.89e-08	9.67e-08
s__Nocardia_sp_BMG111209	3.93e-08	0	1.13e-07	1.2e-07	1.15e-07	2.69e-08	9.16e-08	4.54e-08	5.04e-08	2.52e-08	9.64e-08	4.11e-08	1.01e-07	2.93e-07	2.42e-08
s__Marinobacterium_rhizophilum	1.04e-06	5.32e-07	1.24e-06	7.98e-07	6.65e-07	6.18e-07	6.87e-07	2.72e-07	5.04e-07	8.05e-07	7.23e-07	5.96e-07	5.81e-07	9.29e-07	5.08e-07
s__uncultured_bacterium_Contig11	1.97e-07	2.76e-07	1.8e-07	8.18e-07	1.38e-07	2.42e-07	4.58e-08	2.95e-07	3.53e-07	2.01e-07	4.82e-07	5.75e-07	5.05e-08	6.11e-07	2.18e-07
s__Actinoalloteichus_spitiensis	7.86e-08	4.25e-08	9.01e-08	3.99e-08	2.29e-08	2.69e-08	1.14e-07	5.67e-07	2.52e-08	2.52e-08	4.82e-08	4.11e-08	5.05e-08	4.89e-08	7.25e-08
s__Actinobacillus_succinogenes	2.69e-06	1.62e-06	2.59e-06	1.97e-06	3.99e-06	1.61e-06	2.59e-06	1.41e-06	2.44e-06	2.42e-06	1.13e-06	2.07e-06	1.95e-06	2.49e-06	1.62e-06
s__Clostridium_sp_ASF502	0.00136364	0.00160535	0.0012709	0.0031136	0.00181455	0.000826827	0.0037659	0.00077836	0.00216568	0.000711696	0.0033948	0.00128214	0.00113562	0.00656175	0.00288803
s__Plesiomonas_sp_ZOR0011	1.57e-07	6.38e-08	9.01e-08	9.97e-08	0	0	2.29e-08	1.36e-07	7.56e-08	0	0	1.03e-07	2.02e-07	7.33e-08	2.42e-08
s__Pseudomonas_paralactis	0	4.25e-08	0	7.98e-08	2.29e-08	2.69e-08	0	2.27e-08	0	7.55e-08	0	0	2.53e-08	0	2.42e-08
s__Thermoplasmatales_archaeon_Gpl	3.93e-08	2.13e-08	2.25e-08	1.99e-08	4.59e-08	0	6.87e-08	0	0	1.26e-07	7.23e-08	2.05e-08	0	2.44e-08	4.83e-08
s__uncultured_bacterium_A1Q1_fos_25	0	0	0	0	2.29e-08	0	0	0	0	0	0	0	0	0	0
s__Acinetobacter_pittii	1.42e-06	1.98e-06	1.46e-06	1.97e-06	1.74e-06	1.75e-06	1.6e-06	2.7e-06	1.39e-06	2.14e-06	2.65e-06	1.79e-06	1.84e-06	1.64e-06	2.2e-06
s__Parcubacteria_group_bacterium_GW2011_GWA2_53_21	8.45e-07	2.13e-08	3.15e-07	7.98e-08	7.34e-07	4.3e-07	1.17e-06	6.8e-08	4.28e-07	4.03e-07	2.65e-07	1.03e-07	3.03e-07	5.13e-07	3.14e-07
s__Peptoniphilus_sp_DNF00840	1.97e-06	5.96e-07	8.56e-07	1.36e-06	1.03e-06	3.79e-06	9.39e-07	3.67e-06	3.38e-06	1.89e-06	2.41e-06	2.51e-06	1.16e-06	1.91e-06	2.03e-06
s__Micromonospora_sp_M42	1.97e-08	1.49e-07	6.75e-08	7.98e-08	0	2.69e-08	6.87e-08	2.27e-08	2.52e-08	5.03e-08	2.41e-08	2.05e-08	1.26e-07	4.89e-08	2.42e-08
s__Coriobacteriales_bacterium_DNF00809	4.03e-06	3.66e-06	4.21e-06	5.64e-06	4.06e-06	5.99e-06	7.08e-06	6.99e-06	5.64e-06	5.29e-06	4.27e-06	1.06e-05	6.19e-06	1.68e-05	5.9e-06
s__Rhizobium_phaseoli	1.08e-06	5.32e-07	3.83e-07	1.56e-06	1.24e-06	2.96e-07	8.24e-07	2.72e-07	6.3e-07	4.28e-07	5.78e-07	6.78e-07	4.55e-07	3.18e-07	1.21e-06
s__Capnocytophaga_sp_oral_taxon_329	2.44e-05	1.99e-05	2.29e-05	1.92e-05	1.89e-05	2.08e-05	1.99e-05	2.3e-05	1.78e-05	2.22e-05	1.59e-05	1.87e-05	2.13e-05	1.26e-05	1.95e-05
s__Streptomyces_sp_NRRL_F-2664	1.97e-08	0	0	5.98e-08	0	0	0	0	0	0	4.82e-08	4.11e-08	0	4.89e-08	7.25e-08
s__Mycoplasma_auris	1.57e-07	3.62e-07	2.25e-08	5.98e-08	4.59e-08	5.38e-08	1.14e-07	1.13e-07	1.26e-07	7.55e-08	0	6.16e-08	7.58e-08	1.22e-07	9.67e-08
s__Pseudomonas_sp_P818	3.74e-07	8.51e-08	1.35e-07	1.8e-07	6.88e-08	5.38e-08	1.14e-07	2.27e-08	1.01e-07	2.01e-07	9.64e-08	1.03e-07	1.26e-07	1.47e-07	0
s__Flexilinea_flocculi	9.71e-06	7.57e-06	6.06e-06	1.81e-05	1.68e-05	5.7e-06	9.98e-06	9.82e-06	1.52e-05	4.58e-06	1.45e-05	8.18e-06	7.58e-06	1.92e-05	1.28e-05
s__Geobacillus_thermoleovorans	2.95e-07	2.34e-07	3.83e-07	5.98e-07	5.27e-07	2.15e-07	7.56e-07	2.95e-07	3.78e-07	2.52e-08	5.54e-07	2.67e-07	2.27e-07	8.56e-07	8.46e-07
s__Parcubacteria_group_bacterium_GW2011_GWB1_48_6	0	0	0	0	0	0	0	0	0	0	0	0	0	0	0
s__Nocardia_grenadensis	0	0	2.25e-08	1.4e-07	0	1.61e-07	2.29e-08	1.81e-07	0	0	9.64e-08	3.29e-07	7.58e-08	1.47e-07	9.67e-08
s__Neisseria_wadsworthii	4.95e-06	2.7e-06	4.3e-06	3.33e-06	2.73e-06	6.48e-06	2.86e-06	4.31e-06	6.7e-06	5.29e-06	4.68e-06	4.58e-06	4.19e-06	3.47e-06	5.24e-06
s__uncultured_marine_thaumarchaeote_AD1000_54_F09	0	0	0	0	0	0	0	0	0	0	2.41e-08	0	0	0	0
s__Kribbella_catacumbae	1.53e-06	1.49e-07	1.58e-06	4.79e-07	5.96e-07	1.94e-06	9.85e-07	3.9e-06	2.7e-06	1.01e-07	1.61e-06	2.71e-06	2.05e-06	2.86e-06	3.12e-06
s__Paenibacillus_macquariensis_subsp_macquariensis	1.47e-06	6.59e-07	1.08e-06	3.23e-06	1.26e-06	2.1e-06	8.93e-07	1.86e-06	2.02e-06	1.18e-06	1.93e-06	2.9e-06	8.84e-07	2.08e-06	2.39e-06
s__Leminorella_grimontii	3.17e-06	2.32e-06	3.11e-06	3.73e-06	4.43e-06	3.14e-06	2.82e-06	2.45e-06	3.88e-06	3.83e-06	3.01e-06	2.47e-06	1.95e-06	2.74e-06	2.44e-06
s__uncultured_marine_bacterium_Ant39E11	1.97e-08	0	2.25e-08	0	4.59e-08	0	6.87e-08	0	0	2.52e-08	0	0	0	0	0
s__Terrabacter_sp_Root85	6.09e-07	3.4e-07	3.83e-07	2.99e-07	9.17e-07	3.49e-07	3.21e-07	5.9e-07	1.76e-07	1.11e-06	2.41e-07	2.88e-07	2.02e-07	2.2e-07	2.66e-07
s__Haemophilus_sp_C1	4.33e-07	6.38e-08	4.5e-08	3.99e-07	6.88e-08	1.88e-07	4.35e-07	4.99e-07	5.29e-07	1.76e-07	2.41e-07	4.11e-07	3.79e-07	2.93e-07	5.56e-07
s__Halorubrum_aidingense	1.97e-08	4.25e-08	2.25e-08	0	2.29e-08	2.69e-08	2.29e-08	0	1.51e-07	0	2.41e-08	4.11e-08	7.58e-08	0	2.42e-08
s__Desulfuromonas_sp_TF	2.71e-06	4.49e-06	3.4e-06	4.07e-06	1.9e-06	3.52e-06	3e-06	6.67e-06	2.07e-06	4.76e-06	3.25e-06	2.84e-06	4.42e-06	2.91e-06	3.94e-06
s__uncultured_bacterium_35i19	0	1.49e-07	0	3.99e-08	0	2.69e-08	6.87e-08	4.54e-08	0	0	0	0	7.58e-08	0	0
s__Diaporthe_ampelina	1.14e-06	5.1e-07	8.78e-07	6.98e-07	2.11e-06	1.88e-07	1.33e-06	2.72e-07	4.28e-07	7.8e-07	4.1e-07	2.88e-07	5.05e-08	2.69e-07	4.11e-07
s__Trichosanthes_dioica	0	0	0	0	2.29e-08	0	0	0	0	0	0	0	0	0	0
s__Clostridium_sp_CAG1193	4.88e-05	5.25e-06	2.26e-05	7.5e-05	2.27e-05	9.95e-05	1.11e-05	9.74e-05	7.62e-05	9.66e-06	4.65e-05	4.89e-05	3.14e-05	6.49e-05	1.09e-05
s__Laodelphax_striatella	0	0	2.25e-08	0	0	0	0	0	0	0	0	0	0	0	0
s__Prochlorococcus_phage_P-SSM4	0	0	0	7.98e-08	0	0	0	0	0	2.52e-08	0	0	0	0	0
s__Salvia_miltiorrhiza	0	2.13e-08	0	0	0	0	0	0	0	0	0	0	0	2.44e-08	0
s__Gryllotalpicola_ginsengisoli	2.95e-07	1.7e-07	3.38e-07	1.8e-07	4.36e-07	1.34e-07	7.56e-07	4.54e-08	2.02e-07	3.27e-07	1.69e-07	2.26e-07	1.77e-07	4.16e-07	1.93e-07
s__Verrucomicrobia_bacterium_SCGC_AAA164-L15	3.15e-07	2.76e-07	3.83e-07	5.78e-07	2.52e-07	8.06e-08	5.27e-07	9.07e-08	1.01e-07	2.77e-07	2.17e-07	3.9e-07	2.27e-07	4.64e-07	9.67e-08
s__uncultured_Actinosynnema_sp	0	0	0	0	0	0	0	0	0	0	0	0	0	0	0
s__candidate_division_WWE3_bacterium_GW2011_GWC2_41_23	5.9e-08	0	6.75e-08	3.99e-08	1.61e-07	2.69e-08	9.16e-08	0	5.04e-08	1.26e-07	7.23e-08	4.11e-08	1.01e-07	7.33e-08	2.42e-08
s__Rhodanobacter_sp_Root627	1.18e-07	2.13e-08	6.75e-07	5.19e-07	6.88e-08	2.69e-08	8.93e-07	6.8e-08	2.27e-07	3.52e-07	9.64e-08	4.11e-08	1.77e-07	3.91e-07	0
s__Opitutaceae_bacterium_TAV3	2.36e-07	2.13e-07	2.03e-07	5.78e-07	2.98e-07	1.53e-06	1.83e-07	1.16e-06	1.16e-06	4.28e-07	7.23e-07	6.57e-07	2.27e-07	7.82e-07	6.28e-07
s__Streptomyces_vinaceus	5.9e-08	0	2.25e-08	0	0	5.38e-08	0	0	0	2.52e-08	0	4.11e-08	0	0	2.42e-08
s__Trichuris_trichiura	1.74e-05	9.61e-06	1.67e-05	1.33e-05	1.97e-05	5.31e-05	1.66e-05	4.88e-05	4.63e-05	2.42e-05	3.83e-05	3.37e-05	1.06e-05	2.92e-05	2.96e-05
s__Vogesella_sp_EB	8.45e-07	1.13e-06	1.73e-06	1.2e-06	8.03e-07	8.06e-07	9.39e-07	5.44e-07	1.56e-06	2.19e-06	8.92e-07	2.05e-06	1.24e-06	8.8e-07	8.7e-07
s__Bradyrhizobium_sp_UASWS1016	5.9e-08	0	0	1.99e-08	1.38e-07	0	0	4.54e-08	0	5.03e-08	0	0	0	4.89e-08	0
s__Bacillus_wakoensis	9.24e-07	7.02e-07	8.33e-07	1.34e-06	6.42e-07	1.13e-06	1.1e-06	1.54e-06	1.84e-06	2.01e-07	1.21e-06	1.15e-06	7.33e-07	2.05e-06	1.26e-06
s__Trichuris_suis	1.18e-06	1e-06	6.3e-07	2.97e-06	4.77e-06	6.45e-07	6.64e-07	1.04e-06	1.66e-06	1.06e-06	1.01e-06	1.93e-06	1.57e-06	5.01e-06	7.32e-06
s__Desulfosarcina_cetonica	4.09e-06	1.47e-06	2.23e-06	3.71e-06	1.74e-06	4.7e-06	2.43e-06	9.44e-06	6.12e-06	1.91e-06	3.28e-06	6.12e-06	4.75e-06	3.08e-06	5.95e-06
s__Staphylococcus_saprophyticus	4.88e-06	2.08e-06	2.93e-05	2.37e-06	6.1e-06	9.95e-07	2.13e-06	1.04e-06	1.13e-06	1.18e-06	1.95e-06	7.6e-07	1.01e-06	7.48e-06	1.43e-06
s__uncultured_Nitrospirae_bacterium_Rifle_16ft_4_minimus_4901	0	4.25e-08	0	0	0	0	0	0	0	0	0	0	0	0	2.42e-08
s__Streptococcus_pluranimalium	0	0	0	0	0	2.69e-08	0	0	0	0	0	0	0	0	0
s__Actinobacteria_bacterium_SCGC_AG-212-D09	1.97e-08	2.13e-08	0	0	0	0	0	0	0	0	0	0	2.53e-08	4.89e-08	0
s__Thalassospira_sp_HJ	2.36e-06	3.38e-06	3.83e-06	3.69e-06	1.9e-06	4.46e-06	2.08e-06	2.31e-06	1.99e-06	4.25e-06	3.09e-06	2.79e-06	5.51e-06	2.52e-06	3.92e-06
s__uncultured_Metallosphaera_sp	1.97e-08	0	0	0	0	0	2.29e-08	0	1.01e-07	0	0	4.11e-08	0	0	0
s__Haloterrigena_turkmenica	1.77e-07	6.38e-08	2.48e-07	1.6e-07	3.9e-07	1.21e-06	1.83e-07	7.71e-07	1.21e-06	5.03e-08	9.64e-08	1.81e-06	7.58e-08	1.96e-07	1.45e-07
s__Brevibacillus_sp_Leaf182	7.27e-07	6.38e-07	4.05e-07	4.79e-07	7.11e-07	1.34e-07	8.24e-07	3.63e-07	4.79e-07	7.55e-07	6.75e-07	3.29e-07	5.05e-07	7.33e-07	4.59e-07
s__Aeromonas_aquatica	9.63e-07	9.15e-07	1.13e-06	1.38e-06	4.36e-07	9.41e-07	4.35e-07	6.8e-07	7.06e-07	7.3e-07	6.75e-07	5.55e-07	1.14e-06	4.64e-07	8.22e-07
s__Verrucomicrobia_subdivision_6_bacterium_BACL9_MAG-120820-bin42	9.83e-08	1.28e-07	4.5e-08	1.99e-08	2.29e-08	0	4.58e-08	2.27e-07	7.56e-08	2.52e-08	4.82e-08	2.05e-08	1.52e-07	2.44e-08	0
s__Mycolicibacterium_farcinogenes	0	0	0	1.99e-08	0	0	0	6.8e-08	0	0	4.82e-08	0	0	2.44e-08	7.25e-08
s__Microbacterium_sp_292MF	2.16e-07	2.55e-07	6.53e-07	4.19e-07	2.29e-07	4.3e-07	2.52e-07	3.18e-07	1.51e-07	2.27e-07	4.58e-07	1.64e-07	7.08e-07	5.13e-07	3.38e-07
s__actinobacterium_LLX17	1.57e-07	1.06e-07	1.8e-07	5.78e-07	1.38e-07	2.69e-08	3.89e-07	2.04e-07	2.52e-08	2.52e-08	4.82e-08	1.03e-07	5.05e-08	1.96e-07	9.67e-08
s__Bacillus_sp_PS3	0	0	4.5e-08	0	0	0	0	0	0	0	0	0	0	0	0
s__Propionibacterium_sp_oral_taxon_192	1.2e-06	5.32e-07	8.11e-07	1.24e-06	1.33e-06	1.72e-06	1.03e-06	2.72e-06	1.91e-06	1.81e-06	1.23e-06	1.05e-06	6.82e-07	1.49e-06	1.02e-06
s__Cladophialophora_carrionii	1.97e-08	0	4.5e-08	1.4e-07	0	2.69e-08	2.29e-08	2.27e-08	5.04e-08	5.03e-08	2.41e-08	2.05e-08	2.53e-08	2.44e-08	9.67e-08
s__Arthrobacter_sp_KQ11	0	0	0	0	0	2.69e-08	0	0	0	0	0	2.05e-08	0	0	0
s__Cellulomonas_sp_HZM	1.4e-06	2.11e-06	3.2e-06	2.73e-06	1.24e-06	1.67e-06	1.26e-06	7.71e-07	8.06e-07	1.31e-06	1.57e-06	9.24e-07	2.05e-06	1.08e-06	1.38e-06
s__Granulicella_mallensis	2.65e-06	2.68e-06	2.81e-06	2.03e-06	4.38e-06	1.72e-06	3.48e-06	3.36e-06	3.02e-06	1.91e-06	2.43e-06	2.86e-06	1.74e-06	2.49e-06	2.34e-06
s__Leptospira_sp_B5-022	4.52e-07	5.1e-07	2.25e-07	3.59e-07	5.27e-07	1.88e-07	2.75e-07	4.54e-07	2.77e-07	2.77e-07	4.1e-07	3.08e-07	4.04e-07	1e-06	4.35e-07
s__Thermococcus_kodakarensis	5.5e-07	8.08e-07	5.18e-07	3.59e-07	4.59e-08	4.57e-07	9.16e-08	6.35e-07	3.53e-07	5.54e-07	6.27e-07	1.85e-07	9.6e-07	2.44e-07	4.59e-07
s__Roseburia_sp_CAG309	0.000494429	0.000619637	0.000211257	0.000397213	0.000103166	3.94e-05	0.00225264	0.000328768	0.000419755	6.65e-05	0.000180262	0.000436151	0.000325776	0.001867	6.57e-05
s__Cedecea_davisae	6.09e-07	3.4e-07	4.95e-07	7.98e-08	5.5e-07	1.61e-07	4.12e-07	3.18e-07	4.79e-07	6.54e-07	4.58e-07	4.52e-07	3.03e-07	3.42e-07	1.69e-07
s__Denitrobacterium_detoxificans	1.72e-05	1.19e-05	2.88e-05	2.73e-05	1.62e-05	3.74e-05	2.64e-05	4.84e-05	3.08e-05	2.4e-05	2.53e-05	3.12e-05	2.25e-05	6.24e-05	2.92e-05
s__Gordonia_aichiensis	6.29e-07	1.7e-07	6.75e-07	4.99e-07	2.98e-07	3.23e-07	1.35e-06	1.07e-06	3.53e-07	9.56e-07	9.64e-08	8.22e-08	2.78e-07	4.16e-07	4.11e-07
s__Flavobacterium_tegetincola	3.07e-06	3.55e-06	4.84e-06	3.61e-06	3e-06	3.95e-06	3.5e-06	5.26e-06	4.21e-06	4e-06	3.09e-06	3.47e-06	3.59e-06	2.98e-06	2.59e-06
s__Atopobium_vaginae	1.28e-05	6.55e-06	6.03e-06	2.51e-05	3.39e-05	1.11e-05	6.25e-06	0.000134025	1.17e-05	7.65e-06	1.55e-05	1.79e-05	5.35e-05	0.000145981	2.09e-05
s__Alistipes_sp_CHKCI003	0.000534966	0.00122685	0.000683215	0.000531665	0.000522504	0.000680896	0.00059271	0.0004928	0.000378609	0.000581981	0.000518274	0.000412485	0.000733602	0.000422813	0.000485108
s__Terrimonas_ferruginea	2.79e-05	2.59e-05	2.58e-05	2.23e-05	2.41e-05	2.44e-05	2.55e-05	2.41e-05	2.53e-05	2.59e-05	2.02e-05	2.19e-05	2.85e-05	1.46e-05	2.3e-05
s__Neisseria_subflava	8.85e-07	2.28e-06	8.78e-07	1.89e-06	1.83e-07	1.67e-06	2.29e-08	8.85e-07	3.28e-07	1.33e-06	1.59e-06	1.11e-06	3.21e-06	9.29e-07	2.18e-06
s__Streptomyces_sviceus	5.5e-07	8.51e-08	1.35e-07	3.99e-08	4.82e-07	1.88e-07	0	1.36e-07	2.52e-08	6.04e-07	5.54e-07	4.73e-07	3.29e-07	1.71e-07	7.25e-08
s__uncultured_marine_group_II/III_euryarchaeote_AD1000_66_E09	0	0	0	3.99e-08	0	0	0	0	0	0	0	0	0	0	0
s__Pseudomonas_sp_p21	0	2.13e-08	0	0	2.29e-08	0	0	0	5.04e-08	0	0	2.05e-08	0	0	2.42e-08
s__Arcobacter_halophilus	0	0	0	0	0	0	0	0	0	0	0	0	0	2.44e-08	0
s__Moniliophthora_perniciosa	0	0	4.5e-08	1.99e-08	0	0	0	0	0	0	0	2.05e-08	0	2.44e-08	2.42e-08
s__Bacteroides_faecis	0.000475143	0.0007072	0.000453608	0.000387699	0.000473386	0.000495317	0.00043835	0.000378123	0.000368001	0.000490974	0.000348159	0.00038247	0.000541301	0.000261065	0.000381711
s__Borreliella_bavariensis	0	0	2.25e-08	0	0	0	0	0	2.52e-08	0	0	0	0	2.44e-08	0
s__Papilio_xuthus	1.18e-07	1.7e-07	2.03e-07	9.97e-08	4.59e-08	5.38e-08	1.6e-07	0	2.02e-07	7.55e-08	9.64e-08	1.23e-07	1.01e-07	4.89e-08	4.83e-08
s__Haematospirillum_jordaniae	1.63e-06	4.25e-07	9.23e-07	8.18e-07	1.83e-06	1.96e-06	6.41e-07	2e-06	2.34e-06	5.54e-07	1.64e-06	2.28e-06	1.64e-06	1.2e-06	2.34e-06
s__Ensifer_sp_Root558	0	0	0	5.98e-08	2.29e-08	2.69e-08	0	0	0	0	7.23e-08	0	2.53e-08	7.33e-08	0
s__Bangia_atropurpurea	2.36e-07	2.98e-07	2.93e-07	5.58e-07	4.59e-08	2.69e-07	2.29e-07	2.95e-07	3.02e-07	7.3e-07	3.37e-07	1.03e-07	6.32e-07	1.96e-07	1.93e-07
s__Strigomonas_galati	3.93e-08	6.38e-08	4.5e-08	9.97e-08	4.59e-08	0	4.58e-08	2.27e-08	0	2.52e-08	2.41e-08	4.11e-08	2.53e-08	2.2e-07	9.67e-08
s__Streptomyces_hygroscopicus	6.29e-07	7.87e-07	5.18e-07	7.98e-07	2.29e-07	7.26e-07	4.81e-07	6.8e-07	6.3e-07	7.05e-07	5.54e-07	3.7e-07	1.09e-06	8.8e-07	3.38e-07
s__Clostridium_celatum	2.21e-05	1.08e-05	1.3e-05	1.93e-05	1.72e-05	2.2e-05	1.36e-05	1.72e-05	2.1e-05	1.38e-05	2.64e-05	2.21e-05	8.95e-06	2.25e-05	4.59e-05
s__uncultured_bacterium_WT4	0	0	2.25e-08	0	0	0	0	0	0	0	0	0	0	0	0
s__Butyrivibrio_sp_FCS014	2.39e-05	1.5e-05	9.52e-06	6.34e-05	2.94e-05	1.22e-05	3.35e-05	2.27e-05	3.25e-05	1.43e-05	5.42e-05	2.75e-05	2.16e-05	6.34e-05	5.85e-05
s__Thermococcus_barophilus	9.83e-08	1.28e-07	6.75e-08	2.99e-07	2.29e-07	4.03e-07	2.29e-07	4.76e-07	2.27e-07	1.76e-07	1.45e-07	2.05e-07	1.52e-07	5.62e-07	5.08e-07
s__Microbacterium_oxydans	5.9e-07	4.25e-08	8.78e-07	4.39e-07	5.96e-07	8.87e-07	1.12e-06	6.8e-07	1.03e-06	2.27e-07	3.37e-07	1.15e-06	4.55e-07	1.39e-06	4.35e-07
s__Pseudophaeobacter_arcticus	3.75e-05	4.51e-05	4.49e-05	3.28e-05	4.48e-05	3.23e-05	1.54e-05	3.71e-05	3.53e-05	4.36e-05	3.02e-05	3.78e-05	3.82e-05	2.24e-05	1.83e-05
s__Chinchilla_lanigera	5.9e-08	1.06e-07	0	0	0	5.38e-08	0	0	0	2.52e-08	7.23e-08	4.11e-08	5.05e-08	2.44e-08	2.42e-08
s__Mus_sp	3.93e-08	0	0	1.99e-08	0	5.38e-08	2.29e-08	1.36e-07	0	0	0	2.05e-08	0	0	4.83e-08
s__Chironomus_thummi	0	0	2.25e-08	0	0	0	0	0	0	0	0	0	0	0	0
s__Candidatus_Yanofskybacteria_bacterium_GW2011_GWB1_45_11	3.93e-08	0	0	0	0	0	0	0	0	0	0	0	0	0	0
s__Halioglobus_sp_HI00S01	1.22e-06	7.23e-07	1.26e-06	6.38e-07	2.09e-06	8.87e-07	1.19e-06	7.26e-07	1.16e-06	1.51e-06	1.59e-06	6.98e-07	9.1e-07	1.03e-06	1.09e-06
s__uncultured_bacterium_CSLD10	0	0	0	3.99e-08	0	0	0	0	0	0	0	2.05e-08	2.53e-08	0	0
s__Bacillus_muralis	3.3e-06	2.06e-06	1.91e-06	2.55e-06	3.55e-06	2.45e-06	1.51e-06	4.51e-06	3.98e-06	1.74e-06	3.52e-06	4.07e-06	2.88e-06	3.62e-06	3.5e-06
s__Candidatus_Nitrosopelagicus_brevis	0	2.13e-08	2.25e-08	0	4.59e-08	0	0	0	0	0	0	0	0	4.89e-08	9.67e-08
s__Xenococcus_sp_PCC_7305	3.56e-06	8.59e-06	2.21e-06	5.39e-06	1.72e-06	6.85e-06	6.64e-07	4.04e-06	2.75e-06	9.21e-06	8.27e-06	1.15e-06	1.29e-05	5.48e-06	5.66e-06
s__Cellulomonas_flavigena	3.15e-07	4.47e-07	6.3e-07	4.19e-07	3.67e-07	4.3e-07	4.81e-07	7.48e-07	8.31e-07	3.78e-07	4.58e-07	4.31e-07	5.31e-07	7.33e-07	2.18e-07
s__Bacillus_ligniniphilus	9.24e-07	7.66e-07	4.73e-07	9.77e-07	1.4e-06	1.21e-06	6.87e-07	1.25e-06	1.16e-06	3.52e-07	1.64e-06	9.86e-07	9.86e-07	1.42e-06	8.7e-07
s__Scherffelia_dubia	0	0	4.5e-08	0	2.29e-08	0	2.29e-08	0	0	0	2.41e-08	2.05e-08	0	0	0
s__Hevea_brasiliensis	3.93e-08	0	0	0	0	0	0	0	0	0	2.41e-08	0	0	0	0
s__Acinetobacter_sp_NBRC_100985	3.93e-08	0	6.75e-08	0	0	0	2.29e-08	0	2.52e-08	0	0	0	0	0	0
s__Pseudonocardia_sp_EC080610-09	0	4.25e-08	0	5.98e-08	6.88e-08	0	0	0	0	0	9.64e-08	0	0	0	0
s__Streptococcus_sp_400_SSPC	5.9e-08	0	0	1.6e-07	1.61e-07	5.38e-08	1.37e-07	6.8e-08	1.01e-07	7.55e-08	9.64e-08	6.16e-08	2.02e-07	1.22e-07	1.21e-07
s__Wolbachia_pipientis	3.93e-08	8.51e-08	4.5e-08	3.99e-08	0	2.69e-08	2.29e-08	9.07e-08	7.56e-08	0	4.82e-08	6.16e-08	5.05e-08	1.47e-07	4.83e-08
s__Diaphorina_citri	0	0	0	0	0	0	2.29e-08	0	2.52e-08	0	0	0	0	2.44e-08	2.42e-08
s__Lactobacillus_brevis_subsp_gravesensis	9.83e-08	2.13e-08	2.48e-07	1.6e-07	2.29e-07	1.08e-06	4.58e-08	6.8e-08	3.02e-07	2.52e-07	6.99e-07	1.25e-06	3.03e-07	5.62e-07	4.83e-08
s__Bacillus_phage_vB_BanS-Tsamsa	5.9e-08	1.28e-07	6.75e-08	7.98e-08	2.52e-07	0	2.29e-08	1.59e-07	1.01e-07	2.52e-08	1.69e-07	2.05e-08	1.52e-07	1.22e-07	7.25e-08
s__Succinispira_mobilis	1.89e-06	1.49e-06	1.67e-06	3.05e-06	1.38e-06	1.77e-06	2.27e-06	2.15e-06	2.87e-06	1.03e-06	2.92e-06	2.24e-06	2.05e-06	3.86e-06	2.49e-06
s__Streptomyces_sp_MBRL_10	5.9e-08	0	0	1.4e-07	2.29e-08	8.06e-08	2.29e-08	0	5.04e-08	0	2.41e-08	0	2.53e-08	4.89e-08	2.42e-08
s__Arthrobacter_sp_LS16	7.08e-07	2.34e-07	2.48e-07	3.79e-07	1.47e-06	5.38e-08	4.58e-07	1.43e-06	4.03e-07	3.27e-07	1.45e-07	2.05e-07	2.53e-07	4.16e-07	3.38e-07
s__Aneurinibacillus_migulanus	1.59e-05	3.08e-05	2.06e-05	3.47e-05	4.88e-06	5.15e-05	8.79e-06	3.93e-05	2.87e-05	2.6e-05	3.91e-05	2.79e-05	4.89e-05	2.93e-05	3.76e-05
s__Acidobacteria_bacterium_OLB17	4.38e-06	2.91e-06	3.26e-06	3.77e-06	3.07e-06	2.93e-06	3.39e-06	4.17e-06	3.63e-06	3.37e-06	2.75e-06	4.56e-06	2.22e-06	2.25e-06	2.88e-06
s__Neisseria_sp_oral_taxon_014	3.93e-07	2.13e-07	4.05e-07	6.58e-07	5.04e-07	3.23e-07	2.98e-07	4.08e-07	3.53e-07	2.27e-07	1.69e-07	3.9e-07	3.29e-07	3.42e-07	2.9e-07
s__Biemna_caribea	0	0	0	0	0	0	0	0	0	0	0	0	0	0	0
s__Camelus_ferus	9.83e-08	4.25e-08	0	3.79e-07	4.59e-08	1.88e-07	6.87e-08	1.13e-07	0	2.01e-07	7.23e-08	6.16e-08	0	7.33e-08	1.93e-07
s__Candidatus_Woesebacteria_bacterium_GW2011_GWA1_41_13b	5.9e-08	0	4.5e-08	1.2e-07	6.88e-08	1.34e-07	2.98e-07	5.22e-07	1.01e-07	0	1.21e-07	5.34e-07	0	6.84e-07	2.42e-08
s__Campylobacter_hominis	1.22e-06	7.23e-07	1.08e-06	8.18e-07	7.34e-07	9.14e-07	1.24e-06	5.22e-07	1.26e-06	8.05e-07	6.03e-07	9.86e-07	6.57e-07	5.62e-07	4.83e-07
s__Parcubacteria_group_bacterium_GW2011_GWA1_59_11	9.83e-08	0	3.6e-07	2.99e-07	6.88e-08	1.08e-07	1.14e-07	9.07e-08	1.76e-07	1.51e-07	9.64e-08	1.23e-07	1.01e-07	9.78e-08	2.18e-07
s__Pelagibacteraceae_bacterium_BACL5_MAG-121128-bin54	0	0	2.25e-08	0	6.88e-08	0	0	0	0	0	0	0	0	0	0
s__Streptomyces_sp_NRRL_F-525	1.97e-08	0	0	9.97e-08	0	0	4.58e-08	0	2.52e-08	2.52e-08	2.41e-08	0	0	1.47e-07	9.67e-08
s__Rhodobacteraceae_bacterium_KLH11	1.52e-05	8.76e-06	1.66e-05	1.05e-05	3.34e-05	2.37e-06	1.66e-05	2.95e-06	9.32e-06	7.95e-06	6.19e-06	2.44e-06	3.29e-06	4.79e-06	3.92e-06
s__Acetobacter_malorum	1.67e-06	1.96e-06	2.5e-06	1.87e-06	1.47e-06	2.23e-06	3e-06	1.2e-06	1.44e-06	2.62e-06	2e-06	1.23e-06	2.3e-06	2.52e-06	1.69e-06
s__beta_proteobacterium_KB13	5.9e-08	1.06e-07	1.13e-07	2.39e-07	6.88e-08	2.42e-07	1.14e-07	2.49e-07	1.26e-07	2.52e-07	3.13e-07	1.64e-07	5.05e-07	2.44e-07	2.42e-07
s__Ruminococcus_sp_CAG57	2.61e-05	1.32e-05	1.06e-05	3.88e-05	1.78e-05	1.7e-05	1.66e-05	7.95e-05	2.89e-05	1.18e-05	3.29e-05	2.71e-05	1.74e-05	3.41e-05	3.31e-05
s__Tulasnella_calospora	1.18e-07	1.49e-07	1.58e-07	1.99e-08	6.88e-08	0	2.29e-08	4.54e-08	1.26e-07	2.52e-07	2.41e-08	8.22e-08	1.26e-07	4.89e-08	1.21e-07
s__Aggregatibacter_actinomycetemcomitans	6.02e-06	6.23e-06	7.88e-06	9.51e-06	3.35e-06	7.85e-06	5.59e-06	7.6e-06	8.14e-06	7.05e-06	6.56e-06	8.03e-06	1.12e-05	5.65e-06	8.36e-06
s__Brevundimonas_sp_EAKA	7.86e-08	4.25e-08	3.38e-07	0	3.44e-07	2.69e-08	6.87e-08	1.36e-07	5.04e-08	5.03e-08	1.69e-07	2.05e-08	0	9.78e-08	1.45e-07
s__Pseudomonas_chlororaphis	9.63e-07	5.32e-07	1.24e-06	1.24e-06	1.03e-06	8.6e-07	7.79e-07	7.03e-07	8.82e-07	9.56e-07	8.92e-07	9.24e-07	1.01e-06	9.04e-07	6.53e-07
s__Trichinella_papuae	0	0	9.01e-08	1.99e-08	0	2.69e-08	2.29e-08	0	0	0	3.86e-07	2.05e-08	0	0	0
s__Diplodia_seriata	5.9e-08	4.25e-08	0	3.99e-08	2.29e-08	5.38e-08	4.58e-08	0	2.52e-08	2.52e-08	4.82e-08	6.16e-08	2.53e-08	0	2.42e-08
s__Gallaecimonas_xiamenensis	2.81e-06	7.76e-06	4.48e-06	6.64e-06	9.4e-07	5.03e-06	2.93e-06	3.95e-06	1.18e-06	4.78e-06	5.01e-06	2.65e-06	8.59e-06	3.35e-06	6.11e-06
s__Thysanoplusia_orichalcea_nucleopolyhedrovirus	0	0	0	0	0	0	2.29e-08	0	0	0	0	0	0	0	0
s__Microbacterium_sp_Leaf159	3.93e-08	0	9.01e-08	2.79e-07	9.17e-08	1.34e-07	1.37e-07	1.36e-07	3.53e-07	2.52e-08	0	3.08e-07	0	1.96e-07	4.83e-08
s__Clostridium_sp_RKD	3.34e-07	4.25e-08	2.7e-07	3.39e-07	1.38e-07	1.88e-07	2.06e-07	2.72e-07	2.52e-07	1.51e-07	3.62e-07	4.52e-07	1.52e-07	1.71e-07	2.42e-08
s__Bosea_sp_UNC402CLCol	1.97e-07	8.51e-08	4.5e-08	2.79e-07	3.9e-07	3.49e-07	9.16e-08	4.54e-07	1.76e-07	1.01e-07	1.45e-07	4.52e-07	3.29e-07	3.42e-07	2.18e-07
s__Burkholderia_virus_Bcepil02	0	0	0	0	4.59e-08	0	0	0	0	0	0	0	0	0	0
s__Acholeplasma_multilocale	2.36e-07	1.28e-07	1.8e-07	1.99e-07	1.61e-07	8.06e-08	2.98e-07	1.36e-07	3.53e-07	1.76e-07	1.21e-07	2.26e-07	7.58e-08	3.18e-07	4.83e-08
s__Candidatus_Gottesmanbacteria_bacterium_GW2011_GWA2_42_18	3.74e-07	8.51e-08	1.8e-07	1.2e-07	1.38e-07	1.61e-07	8.47e-07	1.13e-07	2.77e-07	2.01e-07	3.86e-07	1.85e-07	2.02e-07	3.18e-07	4.83e-08
s__Pseudoalteromonas_shioyasakiensis	2.56e-07	4.25e-07	2.48e-07	9.97e-08	3.21e-07	2.42e-07	4.58e-07	1.59e-07	6.3e-07	3.52e-07	5.78e-07	2.26e-07	1.77e-07	1.37e-06	5.08e-07
s__Proteiniphilum_acetatigenes	0.000893059	0.000945067	0.000889091	0.000817663	0.000787082	0.000950878	0.000802874	0.000908461	0.000816985	0.00102033	0.000773037	0.000790722	0.00111431	0.000591869	0.000862734
s__Candidatus_Yanofskybacteria_bacterium_GW2011_GWC1_48_11	7.86e-07	8.51e-08	5.4e-07	3.39e-07	5.27e-07	2.96e-07	1.08e-06	2.04e-07	5.54e-07	2.77e-07	3.62e-07	7.19e-07	3.29e-07	5.38e-07	1.45e-07
s__Marinobacter_nitratireducens	2.75e-07	5.32e-07	1.13e-07	1.8e-07	3.21e-07	2.15e-07	8.01e-07	1.81e-07	2.02e-07	1.51e-07	7.23e-08	8.22e-08	2.78e-07	1.96e-07	2.18e-07
s__Ensifer_sp_Root423	0	1.06e-07	2.93e-07	2.19e-07	9.17e-08	8.06e-08	4.58e-08	6.8e-08	5.04e-08	2.01e-07	7.23e-08	6.16e-08	7.58e-08	2.44e-08	1.93e-07
s__uncultured_Dyadobacter_sp	0	2.13e-08	0	0	0	5.38e-08	4.58e-08	0	2.52e-08	0	0	2.05e-08	0	4.89e-08	0
s__Phormidesmis_priestleyi	9.83e-07	2.38e-06	5.18e-07	7.98e-07	5.04e-07	9.68e-07	1.56e-06	3.24e-06	5.29e-07	1.08e-06	4.1e-07	4.73e-07	8.59e-07	7.33e-07	3.79e-06
s__Pseudomonas_versuta	1.38e-07	1.91e-07	4.5e-08	1.8e-07	2.06e-07	1.34e-07	4.58e-08	1.13e-07	1.51e-07	3.52e-07	3.37e-07	1.03e-07	2.02e-07	1.22e-07	1.69e-07
s__Longilinea_arvoryzae	1.85e-06	2.74e-06	1.17e-06	2.25e-06	2.34e-06	1.45e-06	3.5e-06	1.77e-06	2.32e-06	1.99e-06	2.75e-06	1.91e-06	1.67e-06	4.38e-06	2.68e-06
s__Candidatus_Synechococcus_spongiarum	1.57e-06	1.19e-06	6.08e-07	1.04e-06	4.59e-07	1.45e-06	5.5e-07	3.38e-06	2.17e-06	7.3e-07	1.37e-06	2.79e-06	1.49e-06	1.61e-06	3.55e-06
s__Acidaminococcus_sp_CAG917	1.76e-05	2.08e-05	6.71e-06	1.32e-05	2.29e-05	1.72e-05	2.13e-05	6.42e-06	2.22e-05	9.09e-06	1.21e-05	1.16e-05	2.57e-05	2.35e-05	6.57e-06
s__Candidatus_Azambacteria_bacterium_GW2011_GWA1_42_19	3.93e-08	0	9.01e-08	2.39e-07	0	5.38e-08	2.06e-07	2.27e-08	1.76e-07	7.55e-08	2.41e-08	4.11e-08	0	1.22e-07	7.25e-08
s__Serinicoccus_chungangensis	5.11e-07	6.81e-07	1.58e-07	2.19e-07	3.44e-07	5.11e-07	5.5e-07	3.18e-07	3.02e-07	5.79e-07	3.13e-07	1.85e-07	1.77e-07	9.78e-08	1.69e-07
s__Bombus_terrestris	0	4.25e-08	1.13e-07	1.99e-08	2.29e-08	0	0	2.27e-08	0	2.52e-08	0	8.22e-08	2.53e-08	0	4.83e-08
s__Dehalobacter_restrictus	4.86e-06	4.7e-06	4.21e-06	8.44e-06	7.06e-06	5.46e-06	6.11e-06	6.33e-06	1.04e-05	4.03e-06	1.12e-05	5.86e-06	3.26e-06	1.03e-05	6.67e-06
s__Indibacter_alkaliphilus	1.96e-05	1.71e-05	1.94e-05	1.43e-05	1.53e-05	2.17e-05	1.69e-05	1.8e-05	1.83e-05	1.82e-05	1.4e-05	1.87e-05	1.75e-05	1.38e-05	1.71e-05
s__uncultured_Akkermansia_sp_SMG25	1.97e-08	1e-06	1.8e-07	7.98e-07	4.59e-08	0	0	3.57e-05	0	5.03e-08	9.64e-08	0.000160819	6.65e-06	2.44e-08	3.94e-06
s__Acinetobacter_pragensis	3.93e-08	8.51e-08	4.5e-08	4.19e-07	2.06e-07	1.61e-07	4.58e-08	2.27e-08	1.26e-07	7.55e-08	5.78e-07	8.22e-08	1.26e-07	1.22e-07	2.42e-08
s__Caldicellulosiruptor_sp_Tok7B1	0	0	0	9.97e-08	0	0	0	0	0	0	0	0	0	0	0
s__Sphingopyxis_sp_H012	0	0	2.25e-08	0	0	0	0	0	0	0	0	0	0	0	0
s__uncultured_Roseburia_sp	6.29e-07	3.4e-07	3.38e-07	5.39e-07	9.4e-07	3.49e-07	2.06e-07	3.18e-07	2.27e-07	8.56e-07	3.86e-07	3.49e-07	2.27e-07	1.49e-06	3.14e-07
s__Eubacterium_plexicaudatum	0.0020927	0.000883643	0.00375098	0.00553314	0.00396029	0.00196226	0.00292794	0.00273166	0.00610234	0.00165562	0.00615393	0.00122696	0.00106367	0.00471926	0.00545162
s__Pseudomonas_sp_NBRC_111134	1.97e-08	0	0	1.99e-08	0	2.69e-08	0	0	0	0	0	0	0	0	2.42e-08
s__Mycoplasma_bovoculi	1.97e-08	4.25e-08	2.25e-08	3.99e-08	0	5.38e-08	0	2.27e-08	0	2.52e-08	0	4.11e-08	0	0	4.83e-08
s__SAR86_cluster_bacterium_BACL1_MAG-120507-bin14	5.9e-08	8.51e-08	6.75e-08	1.6e-07	2.29e-07	2.69e-08	6.87e-08	1.13e-07	2.52e-08	0	2.41e-08	6.16e-08	1.26e-07	2.2e-07	0
s__Pseudomonas_sp_NBRC_111127	1.97e-08	0	0	3.99e-08	2.29e-08	0	4.58e-08	0	0	2.52e-08	0	0	0	2.44e-08	0
s__Undaria_pinnatifida	0	0	0	0	0	0	0	0	0	0	0	0	0	2.44e-08	0
s__Vibrio_jasicida	2.97e-06	1.36e-06	2.39e-06	7.58e-07	1.95e-06	5.91e-07	1.42e-06	1.5e-06	1.49e-06	1.08e-06	7.95e-07	1.19e-06	1.62e-06	7.09e-07	4.59e-07
s__Nocardia_flavorosea	1.97e-08	2.13e-08	2.25e-08	3.99e-08	2.29e-08	2.69e-08	4.58e-08	9.07e-08	1.01e-07	0	2.41e-08	2.05e-08	2.53e-08	1.71e-07	0
s__Helicobacter_sp_MIT_11-5569	2.4e-06	3.66e-06	2.99e-06	4.11e-06	7.29e-06	4.44e-06	3.78e-06	4.22e-06	1.21e-05	7.4e-06	1.27e-05	5.55e-06	4.9e-06	2.82e-05	1.3e-05
s__Bifidobacterium_moukalabense	1.38e-06	1.32e-06	1.31e-06	2.43e-06	1.35e-06	7.77e-06	1.44e-06	5.31e-06	4.91e-06	2.34e-06	6.97e-06	8.83e-06	4.19e-06	9.88e-06	4.54e-06
s__Burkholderia_territorii	5.11e-07	5.1e-07	5.63e-07	6.98e-07	3.44e-07	9.68e-07	1.6e-07	1.36e-06	1.11e-06	2.27e-07	3.62e-07	9.04e-07	6.32e-07	1.22e-06	1.26e-06
s__Alteromonas_sp_Mac1	0	0	2.25e-08	2.19e-07	2.29e-08	2.69e-08	0	0	0	0	0	4.11e-08	2.53e-08	0	0
s__Aquimarina_longa	1.45e-05	2.77e-05	1.82e-05	2.2e-05	9.77e-06	2.12e-05	1.2e-05	1.52e-05	9.7e-06	2.15e-05	1.83e-05	1.22e-05	3.18e-05	1.44e-05	1.91e-05
s__Streptococcus_pantholopis	1.75e-06	1.06e-06	2.27e-06	2.87e-06	1.17e-06	9.06e-06	2.08e-06	7.92e-06	8.42e-06	3.85e-06	4.6e-06	4.97e-06	1.01e-06	4.77e-06	5.1e-06
s__Lactobacillus_curvatus	1.4e-06	1.57e-06	3.99e-06	2.21e-06	3.53e-06	1.18e-06	2.5e-06	1.43e-06	2.82e-06	1.56e-06	1.93e-06	1.31e-06	1.06e-06	3.37e-06	1.06e-06
s__Leuconostoc_mesenteroides_subsp_mesenteroides	0	0	2.7e-07	5.98e-08	1.15e-07	2.69e-08	6.87e-08	6.8e-08	1.01e-07	1.01e-07	0	0	2.53e-08	2.44e-08	0
s__Catocala_ultronia	0	0	0	1.99e-08	0	0	0	0	0	0	0	0	0	0	0
s__Pseudomonas_poae	9.83e-08	8.51e-08	2.25e-08	1.4e-07	4.59e-08	5.38e-08	0	7.03e-07	2.52e-08	0	2.41e-08	8.22e-08	0	9.78e-08	1.21e-07
s__Flavobacterium_akiainvivens	2.5e-05	2.95e-05	3.04e-05	2.64e-05	2.66e-05	2.87e-05	3.19e-05	3.3e-05	2.74e-05	3.15e-05	2.11e-05	2.95e-05	3.03e-05	1.76e-05	2.42e-05
s__Burkholderia_sp_H160	3.15e-07	1.49e-07	3.83e-07	2.39e-07	5.27e-07	1.34e-07	2.98e-07	9.07e-08	2.52e-07	6.29e-07	1.45e-07	3.29e-07	4.8e-07	2.44e-08	3.14e-07
s__Microsporum_canis	0	0	0	0	0	0	0	0	2.52e-08	1.26e-07	1.21e-07	2.05e-08	0	0	0
s__Pseudomonas_sp_KG01	3.93e-08	4.25e-08	0	2.99e-07	4.59e-08	2.69e-08	0	0	5.04e-08	0	4.82e-08	2.05e-08	7.58e-08	1.22e-07	1.93e-07
s__Megasphaera_sp_NM10	1.38e-07	1.91e-07	6.75e-08	2.39e-07	3.67e-07	1.08e-07	2.75e-07	2.49e-07	6.05e-07	2.52e-08	2.41e-07	4.11e-08	5.05e-08	7.33e-07	7.25e-08
s__Smithella_sp_F21	1.57e-06	3.15e-06	9.46e-07	3.31e-06	2.27e-06	1.42e-06	2.2e-06	1.66e-06	1.79e-06	1.94e-06	1.98e-06	1.4e-06	1.62e-06	2.37e-06	1.45e-06
s__Caloneis_lewisii	1.97e-08	2.13e-08	2.25e-08	0	0	0	0	2.27e-08	2.52e-08	0	0	0	0	0	0
s__Paenibacillus_pabuli	3.26e-06	3.19e-06	2.5e-06	6.38e-06	5.3e-06	2.12e-06	3.76e-06	1.57e-06	3.63e-06	2.11e-06	5.11e-06	2.03e-06	2.7e-06	5.5e-06	4.83e-06
s__Streptomyces_drozdowiczii	0	0	0	0	0	0	0	0	0	0	0	0	0	2.44e-08	0
s__Sandarakinorhabdus_limnophila	4.13e-07	6.38e-08	7.43e-07	3.59e-07	6.19e-07	1.61e-07	5.5e-07	4.08e-07	3.02e-07	6.04e-07	4.58e-07	3.9e-07	2.02e-07	3.91e-07	2.18e-07
s__Proteocatella_sphenisci	8.28e-06	5e-06	5.52e-06	1.6e-05	7.31e-06	9.14e-06	7.95e-06	9.71e-06	1.25e-05	5.13e-06	1.22e-05	1.05e-05	7.71e-06	1.49e-05	1.13e-05
s__Candidatus_Paraburkholderia_calva	2.75e-07	2.34e-07	1.58e-07	1.8e-07	4.59e-08	5.38e-08	4.58e-08	1.13e-07	7.56e-08	1.26e-07	9.64e-08	1.85e-07	4.04e-07	9.78e-08	7.25e-08
s__Psychromonas_sp_PRT-SC03	7.86e-08	0	6.75e-08	3.99e-08	0	5.38e-08	0	2.27e-08	0	2.52e-08	0	8.22e-08	1.01e-07	0	7.25e-08
s__Comamonas_aquatica	1.04e-06	3.83e-07	6.08e-07	4.59e-07	5.5e-07	9.41e-07	2.06e-07	8.17e-07	9.57e-07	7.55e-07	3.13e-07	7.4e-07	9.6e-07	7.82e-07	9.91e-07
s__Methanopyrus_kandleri	0	4.25e-08	2.25e-08	2.39e-07	1.15e-07	5.38e-08	1.14e-07	4.54e-08	1.01e-07	1.01e-07	2.41e-08	1.23e-07	0	0	2.42e-08
s__Greslania_sp_McPherson_19217	0	0	0	0	0	0	0	0	0	0	2.41e-08	0	0	0	0
s__Lactococcus_phage_BM13	0	0	0	7.98e-08	4.59e-08	0	0	0	0	0	1.45e-07	2.05e-08	5.05e-08	2.44e-08	9.67e-08
s__Chryseobacterium_jeonii	7.92e-06	6e-06	7.61e-06	5.48e-06	8.37e-06	5.83e-06	8.66e-06	7.01e-06	5.97e-06	7.42e-06	4.43e-06	4.85e-06	5.99e-06	4.4e-06	5.24e-06
s__uncultured_bacterium_HF130_01F24	0	0	0	0	0	0	2.29e-08	0	0	0	0	0	0	0	0
s__Cupriavidus_oxalaticus	2.95e-07	2.98e-07	3.38e-07	3.59e-07	8.26e-07	1.88e-07	3.43e-07	1.36e-07	4.03e-07	4.03e-07	2.41e-07	1.64e-07	1.26e-07	9.78e-08	9.67e-08
s__Cupriavidus_sp_HPCL	0	0	0	3.99e-08	6.88e-08	5.38e-08	1.14e-07	0	0	7.55e-08	0	2.05e-08	2.53e-08	2.44e-08	2.42e-08
s__Veillonellaceae_bacterium_DNF00751	2.73e-06	3.06e-06	1.89e-06	5.84e-06	2.68e-06	2.28e-06	5.95e-06	6.33e-06	6.27e-06	2.24e-06	3.18e-06	2.31e-05	3.99e-06	1.27e-05	5.2e-06
s__Mangrovimonas_sp_TPBH4	8.81e-06	1.03e-05	1.09e-05	8.64e-06	6.21e-06	1.21e-05	7.6e-06	6.15e-06	7.46e-06	9.06e-06	8.65e-06	8.55e-06	1.13e-05	5.43e-06	9.09e-06
s__Butyrivibrio_sp_WCE2006	7.27e-06	5.53e-06	5.27e-06	1.58e-05	1.04e-05	2.96e-06	7.83e-06	4.9e-06	9.9e-06	4.2e-06	2.27e-05	6.68e-06	5.89e-06	1.84e-05	2.01e-05
s__Ustilago_maydis	0	0	0	0	0	0	0	0	0	0	4.82e-08	0	0	0	4.83e-08
s__Rickettsia_slovaca	3.93e-08	0	0	0	0	0	0	0	0	0	0	0	0	0	0
s__Clostridium_sp_CAG269	0.000686794	7.27e-05	0.000215625	0.000517324	5.74e-05	0.000286137	0.00033842	0.000231669	0.000235919	0.000207735	0.000557079	0.000640072	0.000278193	0.000114326	8.78e-05
s__Staphylococcus_equorum_subsp_linens	0	2.13e-08	0	0	0	0	0	0	0	0	0	0	0	0	0
s__Bosea_sp_PAMC_26642	4.72e-07	4.89e-07	4.5e-07	1.2e-07	2.06e-07	8.06e-08	2.52e-07	2e-06	3.28e-07	3.52e-07	2.41e-07	2.26e-07	3.03e-07	2.2e-07	1.93e-07
s__Natronobacterium_gregoryi	0	4.25e-08	0	5.98e-08	0	0	2.29e-08	0	5.04e-08	0	7.23e-08	2.05e-08	0	2.44e-08	1.69e-07
s__Arcobacter_anaerophilus	1e-06	4.04e-07	7.2e-07	9.57e-07	6.65e-07	4.84e-07	7.1e-07	7.71e-07	6.3e-07	8.05e-07	4.82e-07	6.57e-07	7.83e-07	8.56e-07	4.83e-07
s__Kamptonema_formosum	0	0	0	1.99e-08	0	0	0	0	0	0	2.41e-08	6.16e-08	0	0	0
s__Pseudomonas_aeruginosa	1.49e-05	1.28e-05	1.54e-05	1.32e-05	1.26e-05	1.52e-05	1.13e-05	1.42e-05	1.59e-05	1.64e-05	1.5e-05	1.39e-05	1.13e-05	1.83e-05	1.51e-05
s__Planococcus_versutus	7.08e-07	3.83e-07	5.18e-07	7.98e-07	6.19e-07	3.76e-07	8.01e-07	4.54e-07	5.29e-07	6.54e-07	4.1e-07	4.73e-07	5.81e-07	6.6e-07	4.11e-07
s__Piscirickettsia_salmonis	9.24e-07	5.32e-07	4.28e-07	6.18e-07	1.26e-06	4.84e-07	7.56e-07	1.34e-06	7.31e-07	3.52e-07	5.3e-07	3.7e-07	4.55e-07	1.69e-06	7.01e-07
s__Prevotella_sp_CAG1320	0.000794035	0.000987817	0.000979331	0.000696973	0.000797859	0.000886097	0.000772396	0.000938695	0.000750389	0.000904884	0.000629941	0.000809643	0.000797433	0.000534352	0.000689559
s__Planctomycetes_bacterium_SM23_32	1e-06	1.79e-06	1.33e-06	1.34e-06	1.56e-06	7.8e-07	8.01e-07	7.03e-07	5.8e-07	9.31e-07	6.27e-07	6.16e-07	5.31e-07	9.04e-07	9.91e-07
s__Legionella_tucsonensis	5.9e-08	2.13e-08	2.25e-08	0	6.88e-08	8.06e-08	2.52e-07	0	5.04e-08	1.01e-07	2.41e-08	6.16e-08	0	2.44e-08	2.42e-08
s__Acinetobacter_indicus	1.06e-06	7.02e-07	4.73e-07	5.39e-07	1.61e-06	1.26e-06	6.87e-07	1.81e-06	1.76e-06	6.29e-07	6.99e-07	1.56e-06	1.42e-06	8.31e-07	9.91e-07
s__Candidatus_Arthromitus_sp_SFB-mouse-NL	1.33e-05	1.25e-05	1.33e-06	6.76e-06	1.32e-05	1.18e-06	5.22e-06	4.76e-07	3.53e-07	6.8e-06	1.57e-06	3.9e-07	5.31e-07	9.19e-06	8.94e-07
s__Caulobacter_sp_CCH5-E12	4.52e-07	1.28e-06	2.03e-07	5.39e-07	4.36e-07	9.41e-07	9.16e-08	7.94e-07	3.53e-07	8.05e-07	7.95e-07	1.23e-07	1.24e-06	8.31e-07	4.83e-07
s__Oxobacter_pfennigii	1.24e-05	1.1e-05	5.79e-06	2.3e-05	1.26e-05	1.4e-05	1.28e-05	1.55e-05	2.15e-05	8.61e-06	2.7e-05	1.48e-05	1.19e-05	2.95e-05	1.78e-05
s__Pseudoalteromonas_piscicida	1e-06	8.29e-07	8.56e-07	5.78e-07	7.34e-07	5.38e-07	3.89e-07	7.94e-07	1.08e-06	8.05e-07	3.13e-07	7.19e-07	9.1e-07	5.13e-07	4.35e-07
s__Dorea_sp_5-2	0.00164321	0.00255892	0.00160425	0.00493109	0.00259425	0.00170959	0.00368699	0.000883443	0.00248111	0.000933223	0.00366815	0.00135914	0.0015795	0.00474776	0.00487907
s__Frankia_casuarinae	3.93e-08	2.13e-08	0	3.99e-08	0	2.69e-08	2.29e-08	0	5.04e-08	2.52e-08	2.41e-08	1.03e-07	1.01e-07	7.33e-08	0
s__Rhodococcus_defluvii	1.38e-07	6.38e-08	9.01e-08	9.97e-08	1.38e-07	5.38e-08	4.35e-07	3.63e-07	2.52e-07	1.26e-07	7.23e-08	1.64e-07	5.05e-08	2.44e-07	4.83e-08
s__Pantoea_rodasii	3.93e-08	0	6.75e-08	1.99e-08	6.88e-08	0	0	0	0	7.55e-08	0	4.11e-08	0	7.33e-08	9.67e-08
s__Fructobacillus_tropaeoli	5.9e-08	0	3.15e-07	2.59e-07	6.88e-08	1.61e-07	6.87e-08	1.36e-07	2.52e-07	1.01e-07	1.45e-07	1.03e-07	5.05e-08	2.69e-07	0
s__Mycobacteroides_immunogenum	1.57e-07	1.91e-07	4.95e-07	2.79e-07	3.44e-07	1.08e-07	1.6e-07	2.04e-07	2.27e-07	1.51e-07	1.69e-07	6.16e-08	3.03e-07	1.47e-07	1.69e-07
s__Thioalkalivibrio_sp_ALJ7	0	0	0	0	0	0	0	0	0	2.52e-08	0	2.05e-08	0	9.78e-08	0
s__Delftia_sp_ZNC0008	1.97e-08	0	0	3.99e-08	0	5.38e-08	0	2.27e-08	5.04e-08	5.03e-08	2.41e-08	4.11e-08	0	2.44e-08	7.25e-08
s__Bradyrhizobium_sp_BTAi1	7.67e-07	1.06e-06	4.05e-07	4.19e-07	8.03e-07	3.49e-07	9.39e-07	2.49e-07	2.27e-07	1.76e-07	1.93e-07	2.26e-07	2.53e-07	5.62e-07	5.32e-07
s__Paenibacillus_sp_FSL_R7-0331	1.63e-06	2.47e-06	1.22e-06	3.87e-06	4.33e-06	9.95e-07	2.38e-06	1.16e-06	3.02e-06	1.36e-06	3.28e-06	1.29e-06	1.52e-06	3.74e-06	2.54e-06
s__Nitratireductor_soli	5.9e-08	2.34e-07	1.35e-07	5.98e-08	1.15e-07	2.69e-08	9.16e-08	2.95e-07	0	2.52e-08	2.41e-08	4.11e-08	1.01e-07	2.44e-07	1.21e-07
s__Burkholderia_sp_USM_B20	1.97e-08	2.76e-07	4.5e-08	1.8e-07	0	1.08e-07	2.29e-08	9.07e-08	0	2.52e-08	9.64e-08	2.05e-08	1.52e-07	1.47e-07	9.67e-08
s__Candidatus_Daviesbacteria_bacterium_GW2011_GWC2_40_12	0	0	0	5.98e-08	0	0	0	4.54e-08	0	7.55e-08	0	0	0	0	0
s__Devosia_sp_17-2-E-8	5.31e-07	6.38e-08	2.25e-07	2.39e-07	2.98e-07	9.41e-07	1.83e-07	1.63e-06	1.46e-06	4.03e-07	7.47e-07	1.6e-06	8.34e-07	8.56e-07	1.35e-06
s__Natronorubrum_bangense	4.33e-07	6.38e-08	3.38e-07	2.59e-07	4.13e-07	5.38e-07	2.75e-07	1.13e-07	3.02e-07	3.27e-07	6.27e-07	1.23e-07	3.03e-07	3.67e-07	5.32e-07
s__Dyseriocrania_griseocapitella	0	0	0	0	0	0	0	0	0	0	0	0	0	0	0
s__uncultured_actinobacterium_Rifle_16ft_4_minimus_12599	1.97e-08	0	0	0	0	2.69e-08	0	0	2.52e-08	0	0	2.05e-08	2.53e-08	0	4.83e-08
s__Arthrobacter_sp_Soil782	3.93e-08	0	2.25e-08	9.97e-08	4.59e-08	5.38e-08	2.29e-08	2.27e-08	0	2.52e-08	0	2.05e-08	2.53e-08	4.89e-08	7.25e-08
s__Streptomyces_sp_W126	0	0	4.5e-08	1.99e-08	0	0	2.29e-08	0	0	0	2.41e-08	0	2.53e-08	2.44e-08	0
s__Oligella_urethralis	5.23e-06	8.51e-07	2e-06	2.01e-06	3.74e-06	2.18e-06	1.76e-06	1.84e-06	3.48e-06	2.59e-06	1.33e-06	2.65e-06	2.07e-06	2.22e-06	3.02e-06
s__Geobacillus_vulcani	1.57e-07	4.68e-07	3.83e-07	1.54e-06	1.83e-07	5.38e-07	9.16e-08	1.36e-07	2.52e-07	2.52e-07	7.71e-07	3.29e-07	6.57e-07	5.87e-07	3.63e-07
s__Artemia_parthenogenetica	0	0	0	0	0	0	0	0	0	0	0	0	0	0	0
s__Rhodonellum_psychrophilum	1.47e-05	1.21e-05	1.34e-05	1.14e-05	1.16e-05	1.67e-05	1.44e-05	1.66e-05	1.53e-05	1.49e-05	1.15e-05	1.42e-05	1.44e-05	9.75e-06	1.31e-05
s__Actinobacteria_bacterium_OK006	7.86e-08	2.13e-08	4.5e-08	9.97e-08	4.59e-08	5.91e-07	6.87e-08	5.67e-07	6.55e-07	1.51e-07	3.37e-07	2.47e-07	2.53e-08	1.71e-07	2.9e-07
s__Firmicutes_bacterium_CAG272	5.77e-05	4.33e-05	5.4e-05	7.44e-05	3.75e-05	3.61e-05	3.87e-05	4.29e-05	5.27e-05	3.42e-05	6.46e-05	5.24e-05	4.87e-05	7.01e-05	5.41e-05
s__Oscillibacter_sp_KLE_1745	8.83e-06	1.36e-05	5.7e-06	1.24e-05	1.36e-05	4.92e-06	9.27e-06	7.42e-06	1.35e-05	4.18e-06	1.53e-05	1.08e-05	1.05e-05	2.16e-05	1.4e-05
s__Streptococcus_sp_2_1_36FAA	0	2.98e-07	0	0	0	5.38e-08	6.87e-08	4.54e-08	0	2.52e-08	2.41e-08	4.11e-08	2.27e-07	4.89e-08	1.21e-07
s__Acetivibrio_ethanolgignens	0.000126645	7.54e-05	6.17e-05	0.000404673	0.000185649	6.48e-05	0.000162008	0.000135839	0.000183106	6.65e-05	0.000341941	0.000142227	9.65e-05	0.000326942	0.00026137
s__Alteromonas_marina	2.16e-07	8.51e-08	2.7e-07	1.8e-07	9.17e-08	2.69e-08	6.87e-08	0	2.02e-07	1.76e-07	2.65e-07	2.05e-07	2.53e-08	2.69e-07	7.25e-08
s__uncultured_gamma_proteobacterium_Rifle_16ft_4_minimus_39789	0	0	0	0	0	0	0	0	0	0	4.82e-08	0	0	0	0
s__Demequina_aurantiaca	2.56e-07	2.34e-07	3.15e-07	3.59e-07	1.61e-07	2.96e-07	1.14e-07	4.31e-07	3.53e-07	3.27e-07	3.37e-07	2.26e-07	1.77e-07	2.69e-07	2.66e-07
s__Moraxella_bovoculi	2.46e-06	1.6e-06	2.12e-06	1.72e-06	2.36e-06	1.85e-06	1.17e-06	1.38e-06	1.44e-06	2.04e-06	1.61e-06	1.64e-06	1.9e-06	1.61e-06	1.98e-06
s__Leuconostoc_gelidum_subsp_gelidum	1.97e-08	0	2.25e-08	0	9.17e-08	0	4.58e-08	0	0	0	0	0	2.53e-08	2.44e-08	0
s__Methanohalophilus_mahii	6.29e-07	1.4e-06	8.56e-07	1.24e-06	1.83e-07	1.85e-06	6.41e-07	1.07e-06	1.03e-06	6.29e-07	1.06e-06	1.95e-06	1.39e-06	7.58e-07	1.02e-06
s__Ruegeria_sp_ANG-R	2.36e-07	6.38e-08	4.5e-08	1.2e-07	4.59e-08	2.69e-08	1.37e-07	4.54e-08	5.04e-08	1.01e-07	7.23e-08	4.11e-08	5.05e-08	4.89e-08	7.25e-08
s__Thermosynechococcus_sp_NK55a	1.77e-07	1.49e-07	1.13e-07	2.19e-07	2.29e-07	1.08e-07	1.14e-07	1.13e-07	2.02e-07	1.01e-07	2.89e-07	1.85e-07	0	4.64e-07	9.67e-08
s__Leptospira_santarosai	4.25e-06	5.68e-06	2.07e-06	4.19e-06	2.91e-06	3.68e-06	1.81e-06	6.03e-06	3.45e-06	4.13e-06	3.93e-06	3e-06	3.82e-06	4.23e-06	7.08e-06
s__Hilarographa_sp_Hila	1.97e-08	0	0	0	0	0	4.58e-08	0	0	0	0	0	0	0	0
s__Deep-sea_thermophilic_phage_D6E	9.83e-08	1.06e-07	6.75e-08	7.98e-08	6.88e-08	0	6.87e-08	1.57e-06	7.56e-08	7.55e-08	2.41e-07	8.22e-08	2.53e-08	4.89e-08	4.83e-08
s__Candidatus_Evansia_muelleri	5.9e-08	8.51e-08	4.5e-08	0	0	1.08e-07	0	4.54e-08	7.56e-08	7.55e-08	0	8.22e-08	1.52e-07	7.33e-08	4.83e-08
s__Phytomonas_sp_isolate_Hart1	7.86e-08	0	6.75e-08	0	2.29e-08	0	0	2.27e-08	5.04e-08	2.52e-08	4.82e-08	6.16e-08	0	2.44e-08	7.25e-08
s__Sorghum_bicolor	2.4e-06	2.13e-07	9.01e-08	1.2e-07	4.59e-08	1.88e-07	2.29e-08	6.8e-08	1.01e-07	1.76e-07	1.01e-06	3.29e-07	3.29e-07	1.47e-07	7.25e-08
s__Chromobacterium_sp_LK1	1.06e-06	1.21e-06	9.91e-07	5.39e-07	1.15e-06	4.03e-07	4.12e-07	7.48e-07	8.82e-07	1.08e-06	5.54e-07	8.01e-07	4.04e-07	6.36e-07	1.02e-06
s__uncultured_marine_thaumarchaeote_AD1000_11_E10	0	0	0	5.98e-08	0	0	0	0	0	0	2.41e-08	0	0	0	0
s__Parcubacteria_group_bacterium_GW2011_GWA1_42_7	3.93e-08	0	6.75e-08	1.99e-08	2.29e-08	2.69e-08	1.6e-07	0	2.52e-08	0	2.41e-08	4.11e-08	1.01e-07	7.33e-08	0
s__Bradyrhizobium_sp_OHSU_III	0	0	0	3.99e-08	6.88e-08	0	0	0	0	0	0	4.11e-08	0	7.33e-08	0
s__Paenibacillus_sp_FJAT-27812	1.49e-06	2.28e-06	1.49e-06	5.54e-06	2.22e-06	2.37e-06	2.04e-06	2.11e-06	1.86e-06	1.86e-06	2.99e-06	2.38e-06	2.63e-06	4.13e-06	3.84e-06
s__Rhizobium_acidisoli	1.97e-07	6.38e-08	1.13e-07	1.6e-07	1.61e-07	1.88e-07	2.29e-07	1.36e-07	7.56e-08	1.76e-07	2.89e-07	1.03e-07	2.27e-07	1.71e-07	1.93e-07
s__Methylobacterium_sp_Leaf93	0	0	0	0	0	0	0	2.27e-08	5.04e-08	2.52e-08	0	4.11e-08	0	2.44e-08	4.83e-08
s__Anaerococcus_rubeinfantis	8.81e-06	7.3e-06	1.39e-05	1.02e-05	6.93e-06	5.46e-06	7.37e-06	6.31e-06	5.72e-06	5.41e-06	3.88e-06	4.77e-06	4.65e-06	4.72e-06	3.92e-06
s__Bradyrhizobium_sp_YR681	2.95e-07	2.13e-08	2.25e-07	1.8e-07	2.52e-07	1.34e-07	1.6e-07	8.85e-07	4.03e-07	1.01e-07	1.93e-07	4.11e-07	2.53e-07	6.36e-07	1.21e-07
s__Gossypium_raimondii	1.04e-06	4.47e-07	9.46e-07	5.98e-07	2.09e-06	8.06e-08	8.47e-07	1.59e-07	5.54e-07	8.81e-07	5.06e-07	1.64e-07	2.78e-07	3.18e-07	2.9e-07
s__Pseudomonas_sp_Eur1_941	0	0	0	0	0	0	0	0	0	2.52e-08	0	0	0	2.44e-08	0
s__Lewinella_cohaerens	1.67e-05	1.41e-05	1.47e-05	1.21e-05	1.63e-05	1.54e-05	1.9e-05	2.03e-05	1.48e-05	1.56e-05	1.18e-05	1.5e-05	1.52e-05	1.11e-05	1.37e-05
s__Methanosarcina_sp_2HT1A15	0	0	0	0	0	0	2.29e-08	6.8e-08	0	0	4.82e-08	0	0	0	0
s__Pseudoalteromonas_sp_520P1_No_423	5.9e-08	0	0	1.02e-06	0	8.06e-08	0	6.8e-08	2.52e-08	0	1.69e-07	0	7.58e-08	1.71e-07	0
s__Latimeria_chalumnae	3.93e-08	0	0	0	0	5.38e-08	0	2.27e-08	2.52e-08	0	0	0	0	0	0
s__Candidatus_Woesebacteria_bacterium_GW2011_GWA1_41_7	1.18e-07	2.13e-08	6.75e-08	3.99e-08	1.15e-07	2.69e-08	2.06e-07	0	5.04e-08	0	1.45e-07	1.23e-07	0	9.78e-08	0
s__uncultured_bacterium_DCM007Kan03	0	0	2.25e-08	1.6e-07	0	0	2.29e-07	0	1.76e-07	2.52e-08	2.41e-08	1.23e-07	0	1.22e-07	0
s__Peptoniphilus_rhinitidis	1.14e-06	6.17e-07	6.75e-07	1.83e-06	5.96e-07	7.8e-07	8.47e-07	7.26e-07	8.82e-07	5.03e-07	1.37e-06	1.01e-06	5.81e-07	1.74e-06	8.46e-07
s__Yarrowia_lipolytica	3.93e-08	0	0	0	0	0	1.14e-07	0	0	0	2.41e-08	2.05e-08	0	0	2.42e-08
s__uncultured_marine_thaumarchaeote_AD1000_18_B11	0	0	0	0	0	0	0	0	0	0	0	2.05e-08	0	0	0
s__Belnapia_moabensis	3.15e-07	1.13e-06	5.18e-07	6.58e-07	4.36e-07	4.57e-07	2.98e-07	4.76e-07	2.77e-07	4.03e-07	6.99e-07	3.29e-07	4.3e-07	8.31e-07	6.04e-07
s__Clostridium_sp_CAG632	4e-05	2.55e-05	1.97e-05	0.000114766	5.82e-05	5.12e-05	5.25e-05	0.00138693	6.05e-05	2.38e-05	8.07e-05	4.39e-05	3.12e-05	0.000103766	8.48e-05
s__Thermogladius_calderae	0	0	0	2.39e-07	2.29e-08	0	2.29e-08	2.27e-08	5.04e-08	0	1.45e-07	2.05e-08	0	1.96e-07	2.42e-08
s__Caminibacter_mediatlanticus	1.42e-06	1.4e-06	1.46e-06	1.87e-06	4.13e-07	1.45e-06	1.05e-06	8.39e-07	1.49e-06	1.76e-06	1.49e-06	1.19e-06	1.59e-06	1.05e-06	8.7e-07
s__Ectocarpus_siliculosus	1.59e-06	3.79e-06	2.41e-06	3.51e-06	2.06e-07	4.87e-06	1.1e-06	3.08e-06	2.07e-06	2.94e-06	2.65e-06	2.12e-06	4.5e-06	2.42e-06	3.09e-06
s__Edaphobacter_aggregans	3.62e-06	6.89e-06	2.81e-06	4.43e-06	1.86e-06	5.11e-06	2.66e-06	2.99e-06	2.87e-06	7.25e-06	4.89e-06	1.36e-06	7.4e-06	4.03e-06	4.01e-06
s__Streptomonospora_alba	4.13e-07	8.51e-07	1.58e-07	5.98e-07	3.67e-07	8.6e-07	2.29e-07	3.86e-07	2.02e-07	6.04e-07	5.06e-07	8.22e-08	1.34e-06	4.4e-07	3.63e-07
s__Corynebacterium_sp_KPL1859	0	0	0	0	2.29e-08	0	0	0	0	0	2.41e-08	0	0	0	0
s__Lactobacillus_siliginis	2.56e-07	8.51e-08	4.73e-07	4.19e-07	5.27e-07	4.84e-07	9.62e-07	4.54e-07	4.28e-07	1.26e-07	2.17e-07	3.29e-07	5.05e-07	1.32e-06	3.14e-07
s__Nitrospira_bacterium_SG8_35_4	2.73e-06	2.7e-06	1.55e-06	2.59e-06	2.18e-06	1.99e-06	2.08e-06	1.57e-06	1.99e-06	3.07e-06	2.68e-06	1.93e-06	2.02e-06	1.98e-06	2.27e-06
s__Aliivibrio_fischeri	1.97e-06	2.51e-06	2.75e-06	2.69e-06	2.2e-06	1.53e-06	3.43e-06	2.2e-06	1.49e-06	2.09e-06	1.81e-06	1.85e-06	2.55e-06	2.32e-06	2.34e-06
s__Streptococcus_phocae	5.5e-07	8.08e-07	6.53e-07	1.36e-06	3.21e-07	7.8e-07	4.58e-07	9.07e-07	4.28e-07	6.8e-07	6.75e-07	2.47e-07	1.14e-06	9.78e-07	8.7e-07
s__Caldimonas_taiwanensis	3.34e-07	1.06e-07	4.28e-07	1.4e-07	2.06e-07	3.49e-07	2.29e-07	4.54e-08	3.28e-07	5.29e-07	1.93e-07	2.88e-07	2.02e-07	2.69e-07	2.9e-07
s__Streptococcus_dysgalactiae	1.63e-06	2.53e-06	1.17e-05	2.91e-06	5.64e-06	4.03e-06	2.82e-06	5.42e-06	5.72e-06	3.8e-06	3.88e-06	3.23e-06	1.54e-06	3.45e-06	1.74e-06
s__Treponema_primitia	2.49e-05	2.34e-05	2.1e-05	4.2e-05	2.26e-05	2.88e-05	2.45e-05	2.68e-05	3.3e-05	1.99e-05	3.16e-05	3.07e-05	3.11e-05	3.94e-05	3.68e-05
s__Marinospirillum_minutulum	2.26e-06	7.23e-07	2.7e-07	2.59e-07	1.88e-06	4.57e-07	1.53e-06	1.13e-07	1.21e-06	1.23e-06	3.86e-07	7.19e-07	1.69e-06	1.08e-06	1.04e-06
s__Ruminococcus_sp_NK3A76	3.26e-05	1.92e-05	1.38e-05	4.51e-05	2.11e-05	1.92e-05	2.27e-05	4.75e-05	2.9e-05	1.45e-05	4.03e-05	2.5e-05	2e-05	3.81e-05	3.74e-05
s__Actinomyces_vaccimaxillae	5.31e-07	5.1e-07	6.3e-07	1.16e-06	5.96e-07	4.52e-06	5.95e-07	5.08e-06	4.64e-06	1.61e-06	2.48e-06	3.06e-06	9.6e-07	2.52e-06	2.51e-06
s__Thiothrix_nivea	4.91e-06	2.64e-06	4.35e-06	2.11e-06	2.61e-06	3.39e-06	2.79e-06	1.79e-06	3.6e-06	6.22e-06	3.16e-06	1.93e-06	3.61e-06	3.13e-06	3e-06
s__Methylocaldum_szegediense	9.63e-07	1.47e-06	8.78e-07	1.02e-06	1.28e-06	8.87e-07	6.18e-07	5.44e-07	9.57e-07	1.31e-06	6.99e-07	1.07e-06	1.01e-06	4.16e-07	4.59e-07
s__Armatimonadetes_bacterium_OLB18	1.53e-06	1.15e-06	1.67e-06	1.32e-06	9.4e-07	1.48e-06	9.39e-07	1.04e-06	7.81e-07	1.51e-06	1.52e-06	8.22e-07	1.14e-06	1.03e-06	7.98e-07
s__Gordonia_phage_Guacamole	0	0	0	0	0	0	0	0	0	0	0	0	0	0	0
s__Clostridium_pasteurianum	1.83e-05	1.48e-05	1.39e-05	3.21e-05	2.16e-05	1.56e-05	2.74e-05	1.96e-05	2.3e-05	1.4e-05	3.46e-05	2.05e-05	1.55e-05	3.21e-05	2.07e-05
s__Escherichia_phage_HK639	0	0	0	1.99e-08	0	0	0	0	0	0	0	0	0	0	0
s__Pantoea_agglomerans	1.42e-06	2.34e-06	1.44e-06	2.07e-06	1.67e-06	1.02e-06	1.88e-06	1.54e-06	1.49e-06	1.99e-06	1.74e-06	1.38e-06	2.83e-06	2e-06	2.08e-06
s__Raoultella_terrigena	9.83e-08	1.06e-07	9.01e-08	1.2e-07	4.59e-08	5.38e-08	6.87e-08	2.04e-07	1.26e-07	1.01e-07	2.41e-07	4.11e-08	2.53e-08	2.44e-07	1.21e-07
s__Verrucomicrobia_bacterium_N20	3.54e-07	2.13e-08	1.13e-07	1.3e-06	3.67e-07	1.08e-07	2.06e-07	3.86e-07	7.56e-07	1.76e-07	1.21e-06	3.29e-07	2.78e-07	1.81e-06	8.94e-07
s__Thioalkalivibrio_sp_ALE30	1.97e-08	0	0	0	0	0	0	2.27e-08	0	0	0	0	0	2.44e-08	7.25e-08
s__Macaca_mulatta	2.56e-07	6.38e-08	3.83e-07	3.59e-07	1.61e-07	2.42e-07	1.1e-06	1.36e-07	1.76e-07	2.27e-07	2.39e-06	4.11e-08	7.58e-08	7.33e-08	9.67e-08
s__Aeromonas_virus_Aes508	0	0	0	0	2.29e-08	0	0	0	0	0	0	0	0	0	0
s__Actinobacteria_bacterium_OV320	7.86e-08	8.51e-08	2.25e-08	1.99e-08	9.17e-08	5.38e-08	5.04e-07	4.54e-08	2.52e-08	0	9.64e-08	1.64e-07	5.05e-08	5.38e-07	4.83e-08
s__uncultured_marine_group_II/III_euryarchaeote_AD1000_59_C09	0	0	0	0	0	0	0	0	0	0	0	0	0	2.44e-08	0
s__Burkholderia_sp_BT03	4.33e-07	4.25e-08	0	1.6e-07	6.88e-08	5.11e-07	1.14e-07	1.61e-06	8.57e-07	1.26e-07	4.34e-07	8.22e-07	5.31e-07	6.36e-07	1.31e-06
s__Haloferax_elongans	3.93e-08	8.51e-08	2.25e-08	5.98e-08	4.59e-08	5.38e-08	6.87e-08	6.8e-08	2.52e-08	3.52e-07	7.23e-08	8.22e-08	5.05e-08	1.96e-07	3.14e-07
s__Neidium_affine	0	0	0	0	0	0	0	0	2.52e-08	0	0	0	0	0	0
s__uncultured_bacterium_Contigcl_6	2.16e-07	2.34e-07	6.75e-08	3.59e-07	1.61e-07	5.38e-08	1.37e-07	2.49e-07	3.53e-07	2.77e-07	4.82e-07	2.47e-07	1.01e-07	7.33e-07	2.9e-07
s__Parcubacteria_group_bacterium_GW2011_GWC1_44_10	7.86e-08	0	2.03e-07	3.59e-07	4.59e-08	2.69e-08	6.87e-08	4.54e-08	2.52e-08	7.55e-08	0	1.85e-07	2.53e-08	9.78e-08	9.67e-08
s__unidentified_virus	0	0	0	1.6e-07	0	0	0	0	0	0	0	0	1.01e-07	0	0
s__Galbibacter_marinus	1.96e-05	2.3e-05	2.09e-05	2.23e-05	1.57e-05	2.33e-05	1.83e-05	2.59e-05	1.96e-05	2.42e-05	1.79e-05	1.95e-05	2.75e-05	1.38e-05	2.26e-05
s__Pseudomonas_mosselii	3.93e-07	2.98e-07	3.83e-07	4.79e-07	3.9e-07	2.96e-07	3.89e-07	2.72e-07	2.02e-07	6.54e-07	4.34e-07	2.88e-07	4.55e-07	3.42e-07	3.63e-07
s__Desulfohalotomaculum_alkaliphilum	4.05e-06	6.57e-06	3.44e-06	9.19e-06	5e-06	5.19e-06	4.6e-06	5.38e-06	6.98e-06	4e-06	7.04e-06	4.97e-06	3.97e-06	6.89e-06	5.44e-06
s__Streptomyces_sp_NRRL_S-337	7.86e-08	4.25e-08	4.5e-08	1.99e-08	2.29e-08	0	0	4.54e-08	2.52e-08	0	2.41e-08	8.22e-08	1.01e-07	2.44e-08	0
s__Arthrobacter_sp_CAL618	0	4.25e-08	0	1.99e-08	0	2.69e-08	2.29e-08	4.54e-08	1.76e-07	5.03e-08	9.64e-08	2.05e-08	7.58e-08	2.44e-08	9.67e-08
s__Deinococcus_ficus	3.74e-07	6.17e-07	6.75e-07	6.78e-07	5.5e-07	8.33e-07	8.24e-07	5.67e-07	1.51e-07	5.29e-07	6.51e-07	3.9e-07	1.21e-06	4.16e-07	3.63e-07
s__uncultured_Meiothermus_sp	0	8.51e-08	0	0	0	0	0	0	0	0	0	0	0	0	0
s__Erwinia_typographi	3.54e-07	4.47e-07	5.4e-07	4.99e-07	3.21e-07	1.96e-06	2.98e-07	9.53e-07	1.56e-06	3.02e-07	4.82e-07	1.58e-06	5.05e-07	8.31e-07	3.87e-07
s__uncultured_Alphaproteobacteria_bacterium	5.9e-08	2.13e-08	0	1.99e-08	2.29e-08	0	0	0	0	5.03e-08	0	2.05e-08	0	0	2.42e-08
s__uncultured_Syntrophothermus_sp	0	0	0	7.98e-08	0	2.69e-08	0	2.27e-08	1.01e-07	0	7.23e-08	6.16e-08	2.53e-08	1.96e-07	2.42e-08
s__uncultured_Clostridiales_bacterium	0	2.13e-08	0	0	0	0	4.58e-08	0	2.52e-08	0	0	2.05e-08	7.58e-08	9.78e-08	4.83e-08
s__Oceanicola_sp_MCTG1561a	8.26e-07	3.11e-06	1.96e-06	1.91e-06	6.88e-08	2.31e-06	8.24e-07	1.07e-06	3.02e-07	1.33e-06	1.78e-06	1.36e-06	2.68e-06	1.03e-06	1.28e-06
s__Chloracidobacterium_thermophilum	3.01e-06	2.47e-06	2.81e-06	1.95e-06	4.2e-06	1.96e-06	2.59e-06	2.31e-06	2.75e-06	2.34e-06	1.93e-06	1.71e-06	1.49e-06	2.27e-06	2.13e-06
s__Lactobacillus_vaginalis	1.22e-05	4.29e-05	5.65e-05	3.55e-06	1.47e-05	0.000166199	6.82e-06	1.22e-05	4.23e-06	6.77e-06	2.9e-05	2.28e-06	5.25e-05	5.01e-06	8.82e-06
s__Leuconostoc_sp_DORA_2	0	0	6.75e-08	0	0	0	1.6e-07	0	5.04e-08	0	2.41e-08	0	7.58e-08	0	0
s__Parcubacteria_group_bacterium_GW2011_GWB2_40_8	2.16e-07	8.51e-08	1.13e-07	6.18e-07	3.9e-07	2.69e-08	2.29e-08	2.04e-07	5.04e-08	7.55e-08	9.64e-08	8.22e-08	5.05e-08	7.33e-08	9.18e-07
s__Bacteroides_xylanisolvens	0.00116394	0.00257288	0.00109125	0.000831285	0.00112809	0.00130502	0.000942098	0.00082717	0.000773444	0.000870329	0.000685352	0.000893196	0.00127584	0.000448504	0.000791071
s__Microterricola_viridarii	2.95e-07	1.28e-07	2.25e-07	1.4e-07	4.36e-07	1.61e-07	5.72e-07	9.07e-08	2.77e-07	1.76e-07	1.21e-07	1.64e-07	4.04e-07	4.4e-07	1.69e-07
s__Aeromonas_veronii	1.55e-06	1.66e-06	1.69e-06	2.01e-06	1.49e-06	1.85e-06	1.31e-06	1.25e-06	1.69e-06	2.21e-06	1.59e-06	1.62e-06	1.64e-06	1.15e-06	1.5e-06
s__candidate_division_TM6_bacterium_GW2011_GWF2_36_131	3.93e-08	0	4.5e-08	1.4e-07	2.29e-08	2.69e-08	2.06e-07	9.07e-08	1.51e-07	7.55e-08	1.21e-07	6.16e-08	0	4.16e-07	4.83e-08
s__Clostridiales_bacterium_PH28_bin88	9.28e-06	7e-06	4.91e-06	9e-06	1.25e-05	5e-06	9.85e-06	4.76e-06	1.19e-05	7.22e-06	8.65e-06	6.18e-06	7.66e-06	8.92e-06	7.76e-06
s__Pseudoalteromonas_flavipulchra	4.52e-07	4.25e-08	1.58e-07	1.99e-08	1.1e-06	2.69e-07	5.95e-07	7.94e-07	3.78e-07	7.3e-07	4.82e-08	2.47e-07	9.35e-07	4.4e-07	4.35e-07
s__Chlamydia_pneumoniae	7.27e-07	1.4e-06	5.85e-07	2.35e-06	4.82e-07	1.05e-06	5.5e-07	1.13e-06	8.57e-07	9.31e-07	6.03e-07	4.6e-06	6.57e-07	1.15e-06	7.01e-07
s__Kitasatospora_mediocidica	2.36e-07	1.28e-07	9.01e-08	1.4e-07	4.59e-08	8.06e-08	1.37e-07	1.36e-07	2.27e-07	1.26e-07	7.23e-08	2.26e-07	7.58e-08	1.47e-07	4.83e-08
s__Aestuariimicrobium_kwangyangense	1.87e-06	4.68e-07	1.13e-06	9.57e-07	1.72e-06	8.33e-07	8.47e-07	2.49e-07	1.01e-06	9.31e-07	7.71e-07	6.16e-07	6.82e-07	1.15e-06	8.46e-07
s__Candidatus_Curtissbacteria_bacterium_GW2011_GWA1_41_11	5.5e-07	2.13e-07	4.73e-07	1.6e-07	9.17e-08	1.08e-07	4.81e-07	2.27e-07	2.27e-07	3.27e-07	7.23e-08	4.11e-08	1.26e-07	2.44e-08	7.25e-08
s__uncultured_Enterobacteriaceae_bacterium	0	0	0	0	0	0	2.29e-08	0	0	0	0	0	0	0	0
s__Facklamia_hominis	4.17e-06	2.62e-06	2.39e-06	4.11e-06	4.52e-06	2.85e-06	2.82e-06	2.81e-06	3.65e-06	2.82e-06	2.99e-06	3.29e-06	3.31e-06	4.01e-06	2.39e-06
s__Pseudomonas_aeruginosa_group	5.9e-08	0	0	0	0	2.69e-08	2.29e-08	2.27e-08	1.26e-07	5.03e-08	4.82e-08	4.11e-08	2.53e-08	0	0
s__Mycobacterium_xenopi	1.77e-07	8.51e-08	1.13e-07	9.97e-08	3.67e-07	1.88e-07	3.43e-07	8.85e-07	1.01e-07	2.52e-07	3.37e-07	1.44e-07	2.27e-07	1.96e-07	2.9e-07
s__Phaeobacter_italicus	2.75e-07	2.13e-08	6.75e-08	3.99e-08	4.59e-08	2.96e-07	9.16e-08	7.48e-07	4.28e-07	0	1.45e-07	3.9e-07	5.05e-07	2.2e-07	5.32e-07
s__Orpinomyces_sp_ukk1	1.97e-08	0	0	0	2.29e-08	2.69e-08	0	0	0	0	0	2.05e-08	2.53e-08	2.44e-08	2.42e-08
s__Osedax_symbiont_Rs2	7.08e-07	1.25e-06	6.3e-07	5.39e-07	6.88e-07	7.8e-07	4.58e-07	1.36e-07	5.54e-07	1.18e-06	5.54e-07	5.96e-07	5.56e-07	3.42e-07	5.32e-07
s__Hypsizygus_marmoreus	1.97e-08	6.38e-08	0	0	2.29e-08	0	4.58e-08	0	0	7.55e-08	2.41e-08	2.05e-08	5.05e-08	0	0
s__Candidatus_Azambacteria_bacterium_GW2011_GWA2_39_10	1.38e-07	0	2.25e-08	7.98e-08	2.29e-08	2.69e-08	1.37e-07	2.27e-08	1.01e-07	0	2.41e-08	2.05e-08	0	2.44e-08	4.83e-08
s__Corynebacterium_pseudogenitalium	1.18e-06	5.74e-07	9.01e-07	8.18e-07	1.1e-06	2.02e-06	1.14e-06	2.72e-07	8.82e-07	2.01e-06	1.95e-06	2.42e-06	8.84e-07	7.58e-07	5.56e-07
s__Pseudomonas_sp_AAC	1.97e-07	2.13e-07	1.13e-07	2.99e-07	2.29e-07	3.49e-07	4.58e-08	1.59e-07	0	3.02e-07	1.45e-07	1.85e-07	2.02e-07	1.96e-07	4.59e-07
s__Candidatus_Uhrbacteria_bacterium_GW2011_GWF2_41_16	3.93e-08	8.51e-08	6.75e-08	9.97e-08	6.88e-08	8.06e-08	2.52e-07	2.49e-07	1.26e-07	7.55e-08	4.82e-08	1.44e-07	1.26e-07	9.78e-08	0
s__Chryseobacterium_gleum	2.1e-05	2.25e-05	2.26e-05	1.98e-05	1.92e-05	2.42e-05	1.92e-05	1.52e-05	1.61e-05	2.67e-05	1.64e-05	1.68e-05	2.45e-05	1.46e-05	1.68e-05
s__Pseudomonas_sp_GM48	0	4.25e-08	0	0	2.29e-08	2.69e-08	0	2.27e-08	2.52e-08	0	9.64e-08	0	0	4.89e-08	1.21e-07
s__Sphingobacterium_siyangense	0	2.13e-08	0	0	0	0	0	0	0	0	0	0	0	0	0
s__Bradyrhizobium_sp_LTSPM299	1.97e-07	1.91e-07	1.35e-07	1.99e-07	1.15e-07	2.96e-07	2.75e-07	1.36e-07	1.76e-07	3.02e-07	2.89e-07	3.08e-07	5.05e-08	7.33e-08	7.25e-08
s__Blautia_sp_KLE_1732	3.87e-05	2.59e-05	2.26e-05	0.000104753	7.76e-05	2.55e-05	5.36e-05	3.75e-05	5.5e-05	2.47e-05	0.000100483	4.23e-05	3.25e-05	0.000135861	7.91e-05
s__uncultured_bacterium_r_06	1.97e-08	2.13e-08	9.01e-08	3.99e-08	0	8.33e-07	6.87e-08	3.18e-07	8.57e-07	2.52e-08	4.82e-08	4.52e-07	0	2.44e-08	0
s__Chryseobacterium_sp_JAH	5.58e-06	5.98e-06	5.22e-06	5.94e-06	3.97e-06	5.11e-06	3.46e-06	3.18e-06	3.53e-06	7.75e-06	4.22e-06	1.64e-06	7.38e-06	3.62e-06	4.76e-06
s__Ficedula_albicollis	6.09e-07	2.42e-06	1.87e-06	1.8e-06	0	1.37e-06	1.19e-06	9.98e-07	3.28e-07	1.66e-06	1.06e-06	8.42e-07	2.98e-06	1.03e-06	2.03e-06
s__Parcubacteria_group_bacterium_GW2011_GWA2_38_27	7.86e-08	2.13e-08	9.01e-08	1.6e-07	1.83e-07	1.08e-07	9.16e-08	0	1.01e-07	0	9.64e-08	1.64e-07	5.05e-08	1.71e-07	1.21e-07
s__Type-D_symbiont_of_Plautia_stali	1.97e-07	1.7e-07	4.5e-08	2.99e-07	2.06e-07	5.38e-08	9.16e-08	1.13e-07	2.02e-07	2.52e-08	1.45e-07	1.64e-07	5.05e-08	7.33e-08	1.21e-07
s__Penicillium_griseofulvum	3.93e-08	4.25e-08	0	2.19e-07	2.29e-08	8.06e-08	6.87e-08	2.27e-08	7.56e-08	0	2.41e-08	0	0	0	7.25e-08
s__SAR86_cluster_bacterium_BACL1_MAG-120820-bin45	0	0	0	7.98e-08	1.83e-07	0	2.29e-07	0	0	0	0	0	0	0	4.83e-08
s__uncultured_marine_group_II/III_euryarchaeote_KM3_64_C08	0	0	0	0	2.29e-08	0	0	0	0	0	0	0	0	0	2.42e-08
s__Mycoplasma_iners	2.75e-07	1.81e-06	2.25e-08	0	6.42e-07	5.38e-08	4.12e-07	4.31e-07	5.04e-08	6.29e-07	9.64e-08	3.7e-07	0	2.44e-08	0
s__Photobacterium_phosphoreum	1.1e-06	1.04e-06	9.46e-07	1.66e-06	1.51e-06	1.16e-06	8.24e-07	1.04e-06	7.81e-07	1.86e-06	8.19e-07	9.45e-07	1.62e-06	8.56e-07	7.01e-07
s__Lactobacillus_hordei	3.28e-06	1.45e-06	1.24e-05	5.62e-06	2.17e-05	8.31e-06	6.78e-06	8.41e-06	2.02e-05	3.85e-06	5.95e-06	5.4e-06	1.74e-06	6.55e-06	3.89e-06
s__Candidatus_Giovannonibacteria_bacterium_GW2011_GWB1_44_23	9.83e-08	2.13e-08	2.25e-08	0	9.17e-08	5.38e-08	2.06e-07	2.27e-08	1.51e-07	2.52e-08	0	1.03e-07	1.52e-07	7.33e-08	4.83e-08
s__Mycoplasma_lipofaciens	1.79e-06	4.66e-06	7.66e-07	9.57e-07	2.89e-06	5.64e-07	2.02e-06	1.34e-06	1.36e-06	2.74e-06	1.3e-06	1.19e-06	5.81e-07	1.05e-06	9.91e-07
s__Erwinia_teleogrylli	7.67e-07	1.04e-06	1.04e-06	1.24e-06	6.65e-07	5.11e-07	1.14e-06	8.17e-07	8.31e-07	6.54e-07	6.99e-07	5.75e-07	8.59e-07	7.09e-07	6.77e-07
s__Neisseria_sp_oral_taxon_020	1.44e-06	7.02e-07	1.71e-06	1.52e-06	1.03e-06	7.8e-07	1.42e-06	9.98e-07	1.16e-06	1.26e-06	6.75e-07	9.04e-07	7.58e-07	5.38e-07	8.46e-07
s__Cryomorphaceae_bacterium_BACL7_MAG-120322-bin74	3.32e-06	1.83e-06	2.34e-06	1.87e-06	1.93e-06	2.58e-06	2.45e-06	1.22e-06	1.76e-06	3.02e-06	1.76e-06	2.28e-06	2.43e-06	2.05e-06	2.56e-06
s__Invertebrate_iridescent_virus_31	0	0	0	0	0	0	0	0	0	0	2.41e-08	0	0	0	0
s__Pseudovibrio_sp_Ad37	1.77e-07	1.28e-07	4.5e-08	2.79e-07	1.38e-07	1.88e-07	1.6e-07	1.81e-07	5.8e-07	1.26e-07	1.93e-07	8.22e-08	1.26e-07	5.38e-07	2.66e-07
s__bacterium_enrichment_culture_clone_2a2010	0	2.13e-08	0	0	0	0	0	0	0	0	0	0	0	0	0
s__Vibrio_phage_ICP2	0	0	0	1.99e-08	0	0	0	0	0	0	0	0	0	7.33e-08	0
s__Sulfolobus_monocaudavirus_SMV3	0	6.38e-08	0	0	0	0	0	0	0	0	0	0	0	0	0
s__Prevotella_sp_S7-1-8	0.000484049	0.000616511	0.000494382	0.000503083	0.000558712	0.000443868	0.000237276	0.000298307	0.000250205	0.000462761	0.000396388	0.000265081	0.000554845	0.000316333	0.000390097
s__Pseudomonas_sp_1-7	3.15e-07	4.68e-07	1.58e-07	3.59e-07	4.59e-08	4.03e-07	4.58e-08	2.95e-07	1.26e-07	4.53e-07	4.58e-07	2.05e-08	5.81e-07	1.96e-07	2.9e-07
s__Dermabacter_sp_HFH0086	1.18e-07	1.06e-07	0	1.6e-07	1.15e-07	3.23e-07	6.87e-08	9.07e-08	1.01e-07	2.27e-07	2.89e-07	3.7e-07	4.55e-07	1.71e-07	7.25e-08
s__Phaeomoniella_chlamydospora	0	0	0	5.98e-08	0	0	0	0	0	0	0	2.05e-08	0	0	2.42e-08
s__Nonomuraea_sp_SBT364	3.93e-07	1.7e-07	1.58e-07	2.39e-07	3.67e-07	2.42e-07	9.16e-08	6.8e-08	2.77e-07	1.26e-07	2.65e-07	1.03e-07	3.03e-07	1.71e-07	1.69e-07
s__Arthrobacter_sp_31Y	1.18e-07	4.25e-08	1.8e-07	9.97e-08	2.29e-08	8.06e-08	1.37e-07	4.54e-08	1.01e-07	2.52e-08	9.64e-08	1.85e-07	7.58e-08	0	2.42e-08
s__Aestuariibacter_salexigens	3.34e-07	2.76e-07	1.8e-07	3.19e-07	1.61e-07	2.15e-07	2.29e-07	4.31e-07	6.55e-07	3.02e-07	1.69e-07	3.49e-07	4.8e-07	2.2e-07	3.14e-07
s__Serratia_sp_C-1	3.93e-08	2.13e-08	4.5e-08	5.98e-08	6.88e-08	1.08e-07	2.29e-08	0	2.52e-08	2.52e-08	0	6.16e-08	0	4.89e-08	0
s__Acidocella_sp_MX-AZ02	4.91e-07	2.34e-07	3.83e-07	3.59e-07	6.42e-07	2.69e-08	4.58e-07	2.04e-07	5.29e-07	8.56e-07	4.34e-07	1.03e-07	1.52e-07	2.2e-07	1.93e-07
s__Citrobacter_sp_MGH_55	7.86e-08	0	0	0	2.29e-08	0	0	0	0	0	4.82e-08	2.05e-08	2.53e-08	2.44e-08	2.42e-08
s__Tannerella_sp_oral_taxon_HOT-286	0.00108334	0.000981245	0.00106239	0.000836691	0.000944663	0.000946255	0.00100436	0.000998325	0.000897186	0.00116139	0.000778725	0.000864927	0.00113663	0.000619491	0.000882432
s__Halonatronum_saccharophilum	3.01e-06	4.02e-06	3.38e-06	5.25e-06	2.06e-06	4.25e-06	2.75e-06	2.74e-06	2.87e-06	3.15e-06	3.9e-06	3.45e-06	5.08e-06	4.4e-06	3.58e-06
s__Flaviramulus_ichthyoenteri	3.5e-06	5.79e-06	3.11e-06	2.93e-06	3.19e-06	3.39e-06	3.37e-06	3.45e-06	3.91e-06	3.42e-06	2.51e-06	4.25e-06	2.96e-06	2.44e-06	2.73e-06
s__Bartonella_ancashensis	1.18e-07	2.13e-08	9.01e-08	7.98e-08	2.29e-08	5.38e-08	2.29e-08	0	0	2.52e-08	7.23e-08	1.23e-07	7.58e-08	0	9.67e-08
s__Lachnospiraceae_bacterium_NC2008	3.46e-05	2.27e-05	1.59e-05	0.00010976	4.75e-05	2.34e-05	4.95e-05	4.04e-05	5.46e-05	2.42e-05	8.03e-05	4.15e-05	3.09e-05	9.66e-05	7.46e-05
s__Arthrobacter_sp_135MFCol51	7.27e-07	1.91e-07	6.98e-07	2.99e-07	5.27e-07	6.45e-07	6.87e-07	2.95e-07	5.54e-07	1.11e-06	6.75e-07	6.57e-07	5.81e-07	7.33e-07	6.53e-07
s__Paenibacillus_antarcticus	1.91e-06	2.83e-06	2.3e-06	8.42e-06	1.4e-06	3.33e-06	2.13e-06	2.97e-06	3.23e-06	2.44e-06	4.07e-06	1.79e-06	2.96e-06	3.84e-06	4.33e-06
s__Streptomyces_kanamyceticus	3.93e-08	2.34e-07	2.48e-07	2.59e-07	1.15e-07	1.16e-06	1.37e-07	4.99e-07	9.57e-07	1.01e-07	2.17e-07	1.15e-06	1.77e-07	3.18e-07	7.25e-08
s__Prevotella_shahii	0.000120845	0.000147497	0.000125971	8.95e-05	0.000120181	0.000103031	0.000122348	0.00012062	0.000104214	0.000137718	8.04e-05	9.71e-05	0.000119323	6.42e-05	8.51e-05
s__bacterium_F082	0.000389036	0.00040423	0.000343487	0.000278777	0.0003178	0.000439326	0.000371119	0.000427614	0.000428423	0.000413633	0.000304727	0.000410841	0.00044429	0.000257252	0.000391088
s__Pseudomonas_sp_URHB0015	1.38e-07	0	3.15e-07	3.79e-07	1.38e-07	1.61e-07	2.29e-08	1.36e-07	2.52e-08	0	9.64e-08	1.03e-07	1.01e-07	2.44e-08	4.83e-08
s__uncultured_Burkholderia_sp	7.86e-08	4.25e-08	4.5e-08	3.19e-07	9.17e-08	0	0	1.59e-07	2.02e-07	5.03e-08	8.92e-07	2.67e-07	0	4.89e-08	9.67e-08
s__Clostridium_chauvoei	6.25e-06	2.7e-06	3.15e-06	6.94e-06	6.26e-06	5.62e-06	6.62e-06	5.08e-06	7.33e-06	2.72e-06	7.18e-06	5.18e-06	4.47e-06	7.87e-06	5.99e-06
s__Pseudopodoces_humilis	1.97e-08	0	0	0	0	0	0	0	0	0	0	0	0	2.44e-08	0
s__Candidatus_Roizmanbacteria_bacterium_GW2011_GWC2_41_7	1.97e-07	3.83e-07	4.73e-07	6.18e-07	1.38e-07	1.08e-07	1.14e-07	1.13e-07	1.01e-07	2.77e-07	1.21e-07	1.23e-07	4.55e-07	0	1.45e-07
s__uncultured_delta_proteobacterium_DeepAnt-32C6	0	0	0	0	0	0	0	0	0	0	0	0	0	0	0
s__Candidatus_Pelagibacter_sp_HTCC7211	3.93e-08	8.51e-08	0	2.79e-07	6.88e-08	0	2.29e-08	3.4e-07	5.04e-08	2.52e-08	4.82e-08	2.67e-07	7.58e-08	9.78e-08	9.67e-08
s__Bacteroides_sp_CAG443	0.00057745	0.000710603	0.000636564	0.000620781	0.000443714	0.000693771	0.000496444	0.000623627	0.000508297	0.000648198	0.000482386	0.000583288	0.00077598	0.000385951	0.000606343
s__Achromobacter_denitrificans	8.06e-07	3.19e-07	4.28e-07	3.79e-07	5.5e-07	2.96e-07	3.21e-07	1.36e-07	3.28e-07	2.52e-07	9.64e-08	3.7e-07	4.8e-07	2.69e-07	1.93e-07
s__Actinosynnema_mirum	4.91e-07	4.47e-07	4.05e-07	2.39e-07	2.98e-07	2.96e-07	2.52e-07	3.63e-07	5.54e-07	1.01e-07	1.45e-07	5.14e-07	5.31e-07	7.33e-08	2.18e-07
s__Klebsiella_sp_RIT-PI-d	6.29e-07	4.04e-07	6.98e-07	6.98e-07	6.65e-07	2.69e-07	1.97e-06	4.08e-07	7.56e-07	8.56e-07	2.89e-07	5.14e-07	3.03e-07	3.42e-07	3.87e-07
s__Nocardia_pneumoniae	3.93e-08	2.34e-07	0	3.99e-08	6.88e-08	0	1.83e-07	2.27e-08	5.04e-08	2.52e-08	2.41e-08	4.11e-08	7.58e-08	9.78e-08	7.25e-08
s__Erwinia_virus_Ea214	0	2.13e-08	2.25e-08	0	0	0	0	0	0	0	0	0	0	0	0
s__Burkholderia_sp_FERM_BP-3421	0	0	0	0	0	0	0	2.27e-08	0	0	0	0	0	0	0
s__Helicobacter_sp_CLO-3	1.65e-06	1.83e-06	1.04e-06	1.85e-06	2.29e-06	4.44e-06	1.81e-06	2.86e-06	4.59e-06	2.92e-06	4.87e-06	2.98e-06	1.69e-06	6.33e-06	5.78e-06
s__Mus_musculus	4.75e-05	5.93e-06	1.02e-05	6.76e-06	1.04e-05	7.5e-05	4.74e-05	3.58e-05	1.19e-05	7.3e-05	8.22e-06	2.38e-05	2.68e-06	8.16e-06	5.34e-05
s__Bacillus_sp_FJAT-27238	1.97e-08	0	0	9.97e-08	2.29e-08	8.06e-08	2.29e-08	6.8e-08	0	0	4.82e-08	0	2.53e-08	1.47e-07	0
s__Photobacterium_aphoticum	1.14e-06	1.32e-06	1.13e-06	1.58e-06	1.24e-06	9.95e-07	7.56e-07	8.39e-07	6.05e-07	1.28e-06	9.16e-07	1.54e-06	1.19e-06	1.32e-06	9.67e-07
s__Brenneria_goodwinii	1.99e-06	1.87e-06	1.94e-06	2.49e-06	1.65e-06	3.2e-06	2.18e-06	1.7e-06	2.27e-06	2.37e-06	2.51e-06	2.14e-06	2.68e-06	2.27e-06	2.61e-06
s__Jeotgalicoccus_psychrophilus	5.84e-05	7.44e-07	9.18e-05	3.23e-05	6.62e-05	2.88e-06	1.45e-05	1.63e-05	1.05e-05	1.03e-05	4.27e-06	4.73e-07	8.09e-07	5.13e-06	4.59e-07
s__Lactobacillus_buchneri	6.41e-06	2.11e-06	4.64e-06	3.89e-06	8.3e-06	7.66e-06	1.01e-05	4.72e-06	6.75e-06	3.07e-06	3.21e-06	3.06e-06	3.31e-06	4.23e-06	3.65e-06
s__uncultured_bacterium_fosmid_pJB95A1	0	0	0	0	0	0	0	0	0	0	0	0	0	0	2.42e-08
s__Butyrivibrio_sp_MC2021	1.95e-05	1.4e-05	1.04e-05	6.49e-05	2.34e-05	1.39e-05	2.63e-05	2.05e-05	3.14e-05	1.43e-05	5.41e-05	2.52e-05	2.05e-05	5.17e-05	5.15e-05
s__Erwinia_toletana	1.77e-07	2.98e-07	2.03e-07	1.2e-07	1.83e-07	1.34e-07	3.21e-07	1.54e-06	3.78e-07	2.01e-07	1.93e-07	3.49e-07	3.29e-07	3.91e-07	4.83e-07
s__Collimonas_fungivorans	1.83e-06	1.08e-06	9.46e-07	7.38e-07	1.44e-06	1.83e-06	1.51e-06	1.59e-06	1.97e-06	1.86e-06	7.47e-07	2.01e-06	1.49e-06	1.08e-06	9.67e-07
s__Clostridium_phage_phiCP13O	2.16e-07	1.91e-07	1.35e-07	4.39e-07	4.13e-07	5.38e-08	3.89e-07	6.8e-08	1.01e-07	5.03e-08	4.1e-07	8.22e-08	7.58e-08	1.47e-07	7.25e-08
s__Acidaminococcus_sp_CAG542	2.58e-06	2e-06	1.85e-06	3.67e-06	2.16e-06	2.77e-06	2.2e-06	3.72e-06	4.71e-06	1.76e-06	4.39e-06	3.2e-06	2.38e-06	5.79e-06	3.99e-06
s__Variovorax_paradoxus	3.11e-06	2.7e-06	2.43e-06	3.83e-06	2.09e-06	2.47e-06	2.18e-06	1.36e-06	2.32e-06	2.67e-06	2.24e-06	2.84e-06	2.48e-06	3.2e-06	2.37e-06
s__Emticicia_sp_MM	8.91e-06	1.24e-05	1.21e-05	1.28e-05	8.97e-06	1.1e-05	1.34e-05	8.73e-06	6.98e-06	1.06e-05	8.92e-06	8.77e-06	1.36e-05	8.97e-06	1.09e-05
[truncated: 13,761 more rows]
