# Supplementary material for: Inhibition of Rho Kinase by Fasudil Ameliorates Cognition Impairment in APP/PS1 Transgenic Mice via Modulation of Gut Microbiota and Metabolites
Source: Front Aging Neurosci. 2021 Oct 14;13:755164. doi: 10.3389/fnagi.2021.755164 (PMC8551711; doi:10.3389/fnagi.2021.755164)
Supplement: Supplementary Table 4 — Differential metabolites in ADNS vs. WT were enriched in 28 signaling pathways. [file Table_4.XLSX]

## Sheet: result
Pathway	Pathway_id	Total	Hits	Raw p	-ln(p)	Holm adjust	FDR	Impact	Hits Cpd	Total Cpd
Acarbose and validamycin biosynthesis	eco00525 (Acarbose and validamycin biosynthesis - eco)	3	1	0.16615	1.7949	1	1	1	cpd:C00842 dTDP-glucose;	D-Glucose 1-phosphate;dTDP-glucose;dTDP-4-oxo-6-deoxy-D-glucose
Polyketide sugar unit biosynthesis	eco00523 (Polyketide sugar unit biosynthesis - eco)	5	1	0.26149	1.3414	1	1	0.3	cpd:C00842 dTDP-glucose;	dTDP-4-dehydro-beta-L-rhamnose;dTDP-4-oxo-6-deoxy-D-glucose;dTDP-glucose;D-Glucose 1-phosphate;dTDP-L-rhamnose
Citrate cycle (TCA cycle)	eco00020 (Citrate cycle (TCA cycle) - eco)	20	2	0.3303	1.1077	1	1	0.11817	cpd:C00417 cis-Aconitate;cpd:C16255 [Dihydrolipoyllysine-residue acetyltransferase] S-acetyldihydrolipoyllysine;	Enzyme N6-(dihydrolipoyl)lysine;2-Oxoglutarate;Thiamin diphosphate;3-Carboxy-1-hydroxypropyl-ThPP;Enzyme N6-(lipoyl)lysine;Succinyl-CoA;Succinate;Oxalosuccinate;Isocitrate;(S)-Malate;cis-Aconitate;Citrate;Oxaloacetate;Acetyl-CoA;Pyruvate;2-(alpha-Hydroxyethyl)thiamine diphosphate;[Dihydrolipoyllysine-residue succinyltransferase] S-succinyldihydrolipoyllysine;Fumarate;[Dihydrolipoyllysine-residue …
Monobactam biosynthesis	eco00261 (Monobactam biosynthesis - eco)	8	1	0.38473	0.9552	1	1	0	cpd:C00224 Adenylyl sulfate;	L-Aspartate;(2S,4S)-4-Hydroxy-2,3,4,5-tetrahydrodipicolinate;L-Aspartate 4-semialdehyde;Pyruvate;Sulfate;4-Phospho-L-aspartate;2,3,4,5-Tetrahydrodipicolinate;Adenylyl sulfate
Streptomycin biosynthesis	eco00521 (Streptomycin biosynthesis - eco)	9	1	0.42113	0.86481	1	1	0.25714	cpd:C00842 dTDP-glucose;	D-Glucose;1D-myo-Inositol 3-phosphate;dTDP-4-dehydro-beta-L-rhamnose;dTDP-4-oxo-6-deoxy-D-glucose;dTDP-glucose;D-Glucose 1-phosphate;D-Glucose 6-phosphate;myo-Inositol;dTDP-L-rhamnose
Taurine and hypotaurine metabolism	eco00430 (Taurine and hypotaurine metabolism - eco)	10	1	0.45541	0.78657	1	1	0.14286	cpd:C00227 Acetyl phosphate;	Taurine;Acetyl-CoA;L-Cysteate;3-Sulfino-L-alanine;Acetate;Aminoacetaldehyde;Sulfite;Acetyl phosphate;Hypotaurine;5-L-Glutamyl-taurine
Pyruvate metabolism	eco00620 (Pyruvate metabolism - eco)	26	2	0.45827	0.7803	1	1	0.07891	cpd:C00227 Acetyl phosphate;cpd:C16255 [Dihydrolipoyllysine-residue acetyltransferase] S-acetyldihydrolipoyllysine;	Enzyme N6-(lipoyl)lysine;2-(alpha-Hydroxyethyl)thiamine diphosphate;Phosphoenolpyruvate;Oxaloacetate;Pyruvate;Methylglyoxal;(R)-S-Lactoylglutathione;(R)-Lactate;(S)-Lactaldehyde;(S)-Malate;Acetyl-CoA;Formate;(S)-Lactate;Acetyl adenylate;Acetate;Acetaldehyde;(R)-Lactaldehyde;Thiamin diphosphate;Enzyme N6-(dihydrolipoyl)lysine;Acetyl phosphate;Fumarate;[Dihydrolipoyllysine-residue acetyltransferase…
Glycolysis / Gluconeogenesis	eco00010 (Glycolysis / Gluconeogenesis - eco)	29	2	0.51702	0.65967	1	1	0.0343	cpd:C06188 Salicin 6-phosphate;cpd:C16255 [Dihydrolipoyllysine-residue acetyltransferase] S-acetyldihydrolipoyllysine;	Ethanol;Thiamin diphosphate;Pyruvate;2-(alpha-Hydroxyethyl)thiamine diphosphate;Enzyme N6-(lipoyl)lysine;Acetyl-CoA;Enzyme N6-(dihydrolipoyl)lysine;Phosphoenolpyruvate;2-Phospho-D-glycerate;D-Glyceraldehyde 3-phosphate;beta-D-Fructose 1,6-bisphosphate;beta-D-Fructose 6-phosphate;D-Glucose;alpha-D-Glucose 6-phosphate;D-Glucose 1-phosphate;beta-D-Glucose 6-phosphate;beta-D-Glucose;alpha-D-Glucose;3…
Phosphonate and phosphinate metabolism	eco00440 (Phosphonate and phosphinate metabolism - eco)	12	1	0.51807	0.65764	1	1	0.25	cpd:C20440 alpha-D-Ribose 1,2-cyclic phosphate 5-phosphate;	Demethylphosphinothricin;Methylphosphonate;alpha-D-Ribose 1-methylphosphonate 5-triphosphate;alpha-D-Ribose 1-methylphosphonate 5-phosphate;alpha-D-Ribose 1,2-cyclic phosphate 5-phosphate;L-Phosphinothricin;2-Aminoethylphosphonate;N-Acetyldemethylphosphinothricin;Methane;D-Ribose 1,5-bisphosphate;N-Acetylphosphinothricin;2-Acetamidoethylphosphonate
Riboflavin metabolism	eco00740 (Riboflavin metabolism - eco)	13	1	0.54669	0.60388	1	1	0.09901	cpd:C01268 5-Amino-6-(5'-phosphoribosylamino)uracil;	D-Ribulose 5-phosphate;5-Amino-6-(5'-phospho-D-ribitylamino)uracil;Riboflavin;5-Amino-6-(1-D-ribitylamino)uracil;L-3,4-Dihydroxybutan-2-one 4-phosphate;6,7-Dimethyl-8-(D-ribityl)lumazine;5-Amino-6-(5'-phosphoribosylamino)uracil;2,5-Diamino-6-(5-phospho-D-ribosylamino)pyrimidin-4(3H)-one;GTP;FMN;FAD;Reduced FMN;Reduced riboflavin
Fructose and mannose metabolism	eco00051 (Fructose and mannose metabolism - eco)	33	2	0.5887	0.52984	1	1	0.01687	cpd:C01222 GDP-4-dehydro-6-deoxy-D-mannose;cpd:C11516 2-(alpha-D-Mannosyl)-3-phosphoglycerate;	D-Fructose;alpha-D-Glucose;Mannitol;D-Mannose;D-Mannitol 1-phosphate;D-Mannose 6-phosphate;GDP-4-dehydro-6-deoxy-D-mannose;GDP-mannose;D-Mannose 1-phosphate;Sorbitol 6-phosphate;D-Sorbitol;beta-D-Fructose 6-phosphate;D-Fructose 1-phosphate;D-Glyceraldehyde 3-phosphate;beta-D-Fructose 1,6-bisphosphate;L-Rhamnose;L-Rhamnulose;L-Rhamnulose 1-phosphate;L-Rhamnonate;2-Dehydro-3-deoxy-L-rhamnonate;L-Fu…
Ubiquinone and other terpenoid-quinone biosynthesis	eco00130 (Ubiquinone and other terpenoid-quinone biosynthesis - eco)	15	1	0.599	0.5125	1	1	0.1194	cpd:C05817 (1R,6R)-6-Hydroxy-2-succinylcyclohexa-2,4-diene-1-carboxylate;	2-Succinyl-5-enolpyruvyl-6-hydroxy-3-cyclohexene-1-carboxylate;2-Succinylbenzoyl-CoA;2-Succinylbenzoate;(1R,6R)-6-Hydroxy-2-succinylcyclohexa-2,4-diene-1-carboxylate;Isochorismate;4-Hydroxybenzoate;Chorismate;1,4-Dihydroxy-2-naphthoyl-CoA;Demethylmenaquinol;1,4-Dihydroxy-2-naphthoate;all-trans-Polyprenyl diphosphate;Menaquinone;Phylloquinone;Menaquinol;Phylloquinol
Terpenoid backbone biosynthesis	eco00900 (Terpenoid backbone biosynthesis - eco)	16	1	0.62287	0.47341	1	1	0.15498	cpd:C11453 2-C-Methyl-D-erythritol 2,4-cyclodiphosphate;	D-Glyceraldehyde 3-phosphate;Pyruvate;1-Deoxy-D-xylulose 5-phosphate;2-C-Methyl-D-erythritol 4-phosphate;4-(Cytidine 5'-diphospho)-2-C-methyl-D-erythritol;2-Phospho-4-(cytidine 5'-diphospho)-2-C-methyl-D-erythritol;2-C-Methyl-D-erythritol 2,4-cyclodiphosphate;Acetyl-CoA;1-Hydroxy-2-methyl-2-butenyl 4-diphosphate;Isopentenyl diphosphate;Dimethylallyl diphosphate;Geranyl diphosphate;trans,trans-Far…
Ascorbate and aldarate metabolism	eco00053 (Ascorbate and aldarate metabolism - eco)	18	1	0.66651	0.4057	1	1	0	cpd:C00072 Ascorbate;	Ascorbate;L-Ascorbate 6-phosphate;UDP-glucose;3-Dehydro-L-gulonate;Pyruvate;2-Hydroxy-3-oxopropanoate;D-Glucarate;5-Dehydro-4-deoxy-D-glucarate;D-Galactarate;L-Xylulose 5-phosphate;3-Dehydro-L-gulonate 6-phosphate;L-Ribulose 5-phosphate;L-Galactonate;UDP-glucuronate;(4R,5S)-4,5,6-Trihydroxy-2,3-dioxohexanoate;2-Dehydro-3-deoxy-D-glucarate;D-Xylulose 5-phosphate;D-Tagaturonate
Sulfur metabolism	eco00920 (Sulfur metabolism - eco)	20	1	0.70517	0.34932	1	1	0.04893	cpd:C00224 Adenylyl sulfate;	Hydrogen sulfide;Sulfate;Adenylyl sulfate;3'-Phosphoadenylyl sulfate;Methanesulfonic acid;Dimethyl sulfone;Dimethyl sulfoxide;O-Acetyl-L-serine;Thiosulfate;L-Serine;O-Succinyl-L-homoserine;L-Homoserine;Alkanesulfonate;Taurine;Sulfite;Dimethyl sulfide;L-Cysteine;Acetate;L-Homocysteine;Succinate
Glycerophospholipid metabolism	eco00564 (Glycerophospholipid metabolism - eco)	22	1	0.73941	0.30191	1	1	0.05619	cpd:C00350 Phosphatidylethanolamine;	Phosphatidylcholine;1,2-Diacyl-sn-glycerol;Phosphatidylserine;sn-Glycero-3-phosphoethanolamine;CDP-diacylglycerol;Phosphatidylethanolamine;1-Acyl-sn-glycerol 3-phosphate;sn-Glycerol 3-phosphate;Ethanolamine;Phosphatidylglycerophosphate;1-Acyl-sn-glycero-3-phosphoethanolamine;2-Acyl-sn-glycero-3-phosphoethanolamine;Phosphatidate;2-Acyl-sn-glycero-3-phosphocholine;sn-Glycero-3-phosphocholine;1-Acyl…
Amino sugar and nucleotide sugar metabolism	eco00520 (Amino sugar and nucleotide sugar metabolism - eco)	44	2	0.74502	0.29435	1	1	0.03919	cpd:C16154 UDP-L-Ara4FN;cpd:C01222 GDP-4-dehydro-6-deoxy-D-mannose;	N-Acetyl-D-glucosamine;N-Acetyl-alpha-D-glucosamine 1-phosphate;N-Acetyl-D-mannosamine;alpha-D-Galactose 1-phosphate;UDP-glucose;D-Glucose 1-phosphate;D-Glucosamine 6-phosphate;N-Acetyl-D-glucosamine 6-phosphate;D-Mannose 6-phosphate;GDP-mannose;alpha-D-Glucosamine 1-phosphate;D-Fructose 6-phosphate;alpha-D-Galactose;D-Mannose 1-phosphate;GDP-L-fucose;UDP-glucuronate;UDP-L-Ara4O;UDP-L-Ara4N;UDP-L…
Thiamine metabolism	eco00730 (Thiamine metabolism - eco)	23	1	0.75503	0.281	1	1	0	cpd:C04294 5-(2-Hydroxyethyl)-4-methylthiazole;	Iminoglycine;1-Deoxy-D-xylulose 5-phosphate;Thiocarboxy-[sulfur-carrier protein];Adenylyl-[sulfur-carrier protein];[Enzyme]-S-sulfanylcysteine;[Enzyme]-cysteine;L-Cysteine;Sulfur-carrier protein;Thiamine;Thiamin monophosphate;Thiamin diphosphate;5-(2-Hydroxyethyl)-4-methylthiazole;4-Amino-2-methyl-5-(phosphooxymethyl)pyrimidine;4-Amino-5-hydroxymethyl-2-methylpyrimidine;D-Glyceraldehyde 3-phospha…
Phenylalanine, tyrosine and tryptophan biosynthesis	eco00400 (Phenylalanine, tyrosine and tryptophan biosynthesis - eco)	23	1	0.75503	0.281	1	1	0.05239	cpd:C01302 1-(2-Carboxyphenylamino)-1-deoxy-D-ribulose 5-phosphate;	Shikimate;Quinate;5-O-(1-Carboxyvinyl)-3-phosphoshikimate;Indoleglycerol phosphate;Indole;1-(2-Carboxyphenylamino)-1-deoxy-D-ribulose 5-phosphate;N-(5-Phospho-D-ribosyl)anthranilate;Chorismate;Prephenate;Phenylpyruvate;L-Arogenate;Shikimate 3-phosphate;3-Dehydroquinate;2-Dehydro-3-deoxy-D-arabino-heptonate 7-phosphate;D-Erythrose 4-phosphate;Phosphoenolpyruvate;L-Tyrosine;3-Dehydroshikimate;L-Try…
Methane metabolism	eco00680 (Methane metabolism - eco)	26	1	0.79657	0.22744	1	1	0	cpd:C00227 Acetyl phosphate;	Formate;Pyruvate;2-Phospho-D-glycerate;3-Phospho-D-glycerate;3-Phosphonooxypyruvate;O-Phospho-L-serine;Oxaloacetate;Phosphoenolpyruvate;D-Fructose 1,6-bisphosphate;D-Fructose 6-phosphate;Trimethylamine N-oxide;S-(Hydroxymethyl)glutathione;S-Formylglutathione;Acetate;Acetyl-CoA;5,10-Methylenetetrahydrofolate;Glycine;L-Serine;CO2;(S)-Malate;D-Glyceraldehyde 3-phosphate;Glycerone phosphate;Trimethyl…
Pentose phosphate pathway	eco00030 (Pentose phosphate pathway - eco)	26	1	0.79657	0.22744	1	1	0.02114	cpd:C01236 D-Glucono-1,5-lactone 6-phosphate;	D-Ribose 1,5-bisphosphate;alpha-D-Glucose 6-phosphate;2-Dehydro-3-deoxy-6-phospho-D-gluconate;Deoxyribose;2-Deoxy-D-ribose 1-phosphate;2-Deoxy-D-ribose 5-phosphate;D-Ribose 5-phosphate;alpha-D-Ribose 1-phosphate;D-Ribose;Sedoheptulose 7-phosphate;D-Glyceraldehyde 3-phosphate;D-Ribulose 5-phosphate;beta-D-Fructose 6-phosphate;beta-D-Fructose 1,6-bisphosphate;6-Phospho-D-gluconate;D-Glucono-1,5-lac…
Pyrimidine metabolism	eco00240 (Pyrimidine metabolism - eco)	51	2	0.81605	0.20329	1	1	0.10834	cpd:C00365 dUMP;cpd:C00178 Thymine;	UDP;UMP;L-Glutamine;Carbamoyl phosphate;(S)-Dihydroorotate;Orotidine 5'-phosphate;CTP;UTP;Uridine;5,6-Dihydrouracil;CDP;Cytidine;CMP;Cytosine;dCDP;dCTP;dCMP;dUTP;dUDP;dUMP;Deoxyuridine;Deoxycytidine;dTDP;dTMP;Thymidine;5-Methylcytosine;(R)-5,6-Dihydrothymine;Uracil;Pseudouridine;3'-UMP;2',3'-Cyclic UMP;3'-CMP;2',3'-Cyclic CMP;Ureidoacrylate;3-Oxopropanoate;Aminoacrylate;(Z)-3-Peroxyaminoacrylate;…
Arginine and proline metabolism	eco00330 (Arginine and proline metabolism - eco)	29	1	0.83116	0.18494	1	1	0	cpd:C00148 L-Proline;	Creatinine;L-Arginine;Agmatine;Putrescine;gamma-L-Glutamylputrescine;gamma-Glutamyl-gamma-aminobutyraldehyde;4-(L-gamma-Glutamylamino)butanoate;4-Aminobutyraldehyde;S-Adenosylmethioninamine;S-Adenosyl-L-methionine;L-erythro-4-Hydroxyglutamate;L-4-Hydroxyglutamate semialdehyde;L-1-Pyrroline-3-hydroxy-5-carboxylate;(S)-1-Pyrroline-5-carboxylate;L-Glutamyl 5-phosphate;L-Glutamate;L-Glutamate 5-semia…
Pentose and glucuronate interconversions	eco00040 (Pentose and glucuronate interconversions - eco)	35	1	0.88388	0.12343	1	1	0	cpd:C03033 beta-D-Glucuronoside;	3-Dehydro-L-gulonate 6-phosphate;3-Dehydro-L-gulonate;beta-D-Glucuronoside;L-Arabinose;L-Ribulose;D-Ribulose;D-Ribulose 5-phosphate;L-Ribulose 5-phosphate;D-Xylulose;2-Dehydro-3-deoxy-D-xylonate;D-Xylonate;L-Xylulose;D-Xylose;D-Glucose 1-phosphate;UDP-glucose;D-Glucuronate;D-Mannonate;D-Altronate;D-Galacturonate;D-Tagaturonate;Pectin;5-Dehydro-4-deoxy-D-glucuronate;2-Dehydro-3-deoxy-D-gluconate;L…
Glyoxylate and dicarboxylate metabolism	eco00630 (Glyoxylate and dicarboxylate metabolism - eco)	37	1	0.89756	0.10808	1	1	0.02305	cpd:C00417 cis-Aconitate;	Hydroxypyruvate;cis-Aconitate;Isocitrate;N-Formylderivatives;Oxalyl-CoA;Glycolate;Formate;Citrate;Glycolaldehyde;Ethylene glycol;D-Glycerate;Glyoxylate;(S)-Malate;meso-Tartaric acid;(R,R)-Tartaric acid;2-Phosphoglycolate;Acetyl-CoA;(R)-Methylmalonyl-CoA;Glycine;Hydrogen peroxide;L-Glutamate;4-Hydroxy-2-oxoglutarate;Acetate;2-Hydroxy-3-oxopropanoate;Succinate;Formyl-CoA;CO2;Oxaloacetate;2-Hydroxy-…
Folate biosynthesis	eco00790 (Folate biosynthesis - eco)	38	1	0.90379	0.10116	1	1	0	cpd:C05925 Dihydroneopterin phosphate;	Chorismate;4-Amino-4-deoxychorismate;THF-polyglutamate;Tetrahydrofolate;Dihydrofolate;Dihydropteroate;4-Aminobenzoate;6-Hydroxymethyl-7,8-dihydropterin diphosphate;6-(Hydroxymethyl)-7,8-dihydropterin;7,8-Dihydroneopterin;7,8-Dihydroneopterin 3'-triphosphate;2,5-Diamino-6-(5'-triphosphoryl-3',4'-trihydroxy-2'-oxopentyl)-amino-4-oxopyrimidine;2,5-Diaminopyrimidine nucleoside triphosphate;Formamidop…
Aminoacyl-tRNA biosynthesis	eco00970 (Aminoacyl-tRNA biosynthesis - eco)	45	1	0.93809	0.063907	1	1	0	cpd:C00148 L-Proline;	L-Asparagine;L-Histidine;L-Phenylalanine;L-Arginine;L-Glutamine;L-Cysteine;Glycine;L-Aspartate;L-Serine;L-Methionine;L-Valine;L-Alanine;L-Lysine;L-Isoleucine;L-Leucine;L-Threonine;L-Tryptophan;L-Methionyl-tRNA;10-Formyltetrahydrofolate;L-Tyrosine;L-Proline;L-Glutamate;L-Seryl-tRNA(Sec);L-Asparaginyl-tRNA(Asn);L-Histidyl-tRNA(His);L-Phenylalanyl-tRNA(Phe);L-Arginyl-tRNA(Arg);Glutaminyl-tRNA;L-Cyst…
Purine metabolism	eco00230 (Purine metabolism - eco)	73	2	0.93931	0.062615	1	1	0.01497	cpd:C00385 Xanthine;cpd:C00224 Adenylyl sulfate;	GDP;(S)-Ureidoglycine;Allantoate;D-Ribose 5-phosphate;L-Glutamine;5-Phospho-alpha-D-ribose 1-diphosphate;5-Phosphoribosylamine;5'-Phosphoribosylglycinamide;2-(Formamido)-N1-(5'-phosphoribosyl)acetamidine;1-(5'-Phosphoribosyl)-5-amino-4-imidazolecarboxamide;1-(5'-Phosphoribosyl)-5-amino-4-(N-succinocarboxamide)-imidazole;1-(5-Phospho-D-ribosyl)-5-amino-4-imidazolecarboxylate;1-(5'-Phosphoribosyl)-…
