# Supplementary material for: Inhibition of Rho Kinase by Fasudil Ameliorates Cognition Impairment in APP/PS1 Transgenic Mice via Modulation of Gut Microbiota and Metabolites
Source: Front Aging Neurosci. 2021 Oct 14;13:755164. doi: 10.3389/fnagi.2021.755164 (PMC8551711; doi:10.3389/fnagi.2021.755164)
Supplement: Supplementary Table 7 — Correlation analysis of the species and 20 differential metabolites (p value). [file Table_7.XLSX]

## Sheet: 20 differential metabolites
	9-Riburonosylhypoxanthine	3-(ADP)-2-phosphoglycerate	Leukotriene C5	Thymine	"D-Glucono-1,5-lactone 6-phosphate"	"dTDP-4-oxo-2,3,6-trideoxy-D-glucose"	alpha-Amino-4-carboxy-3-furanpropanoic acid	L-Dopachrome	UDP-4-dehydro-6-deoxy-D-glucose	Prolyl-Gamma-glutamate	2-Aminoadenosine	O-Phospho-4-hydroxy-L-threonine	2-hydroxy-3-[4-(sulfooxy)phenyl]propanoic acid	CDP-DG(18:0/18:0)	Leukotriene F4	"DG(22:4(7Z,10Z,13Z,16Z)/24:0/0:0)"	"TG(22:5(4Z,7Z,10Z,13Z,16Z)/24:1(15Z)/o-18:0)"	TG(22:0/o-18:0/22:0)	"TG(22:1(13Z)/22:6(4Z,7Z,10Z,13Z,16Z,19Z)/22:1(13Z))"	Hexanoyl-CoA
WT_1	0.0387473247	0.04074486	0.02724336	0.000140373	0.06642302	0.3669304	0.06493315	0.0144139505	0.10753222	0.01937218	0.11362489	0.08012785	0.1989457	0.004474721	0.3295950	0.0757816	0.011292282	0.0157672181	0.013080436	0.04155182
WT_2	0.0075610712	0.04652626	0.01064382	0.007016793	0.05381579	0.2338750	0.07268028	0.0147976818	0.09843398	0.07361667	0.21510324	0.07025186	0.2204770	0.003605352	0.1342254	0.064751	0.003904665	0.0045261936	0.003564815	0.02118369
WT_3	0.0184356380	0.02363577	0.05595532	0.004689899	0.06384453	0.4269517	0.07311165	0.0093347529	0.12897348	0.03663183	0.15233784	0.06064506	0.2154543	0.011673446	0.5673052	0.0558543	0.025754441	0.0739888765	0.027363899	0.12234170
WT_4	0.0050655529	0.02733074	0.03419931	0.022744068	0.04430232	0.5146009	0.08427779	0.0129780189	0.08371824	0.06268422	0.18926808	0.05377980	0.3496405	0.009792032	0.3334995	0.0536387	0.012554380	0.0463096335	0.016227527	0.06710071
WT_5	0.0128096242	0.03785616	0.05458135	0.015206527	0.03991039	0.4003332	0.03525648	0.0205792861	0.09811895	0.04140473	0.21071869	0.03578948	0.2361371	0.012629575	0.5185423	0.0624406	0.034820311	0.0866663295	0.018054752	0.13033721
ADNS_1	0.0001669804	0.02399901	0.08657291	0.096694937	0.10442889	0.5277020	0.20963502	0.0001669804	0.07603741	0.06577698	0.35379899	0.10993068	1.8913898	0.030199290	0.9282209	0.130855	0.047602666	0.0042930094	0.032415730	0.19861665
ADNS_2	0.0001133989	0.02037194	0.05669016	0.042339315	0.09687851	0.7628812	0.22998648	0.0058774192	0.07208416	0.19215468	0.66044371	0.08920000	1.2332082	0.029218138	0.5540034	0.09365	0.031913586	0.0081038360	0.033916600	0.13859155
ADNS_3	0.0034154448	0.02071311	0.06673001	0.067142844	0.07533616	0.4675924	0.08556660	0.0105655627	0.03546974	0.16096014	0.33155142	0.08256763	0.2459098	0.012108583	0.5806235	0.11059	0.028375918	0.0059225829	0.028170730	0.10392104
ADNS_4	0.0001357944	0.02201053	0.08082452	0.045728425	0.10074573	0.8396498	0.13063019	0.0046684410	0.05323262	0.26664957	0.67772283	0.07828751	1.7941920	0.024433960	0.5500308	0.0895158	0.026570451	0.0009764309	0.022467875	0.12702191
ADNS_5	0.0001359903	0.02118003	0.07754805	0.079101233	0.07926680	0.7493334	0.21048253	0.0055333801	0.06018479	0.13846457	0.28059915	0.07254936	0.9048273	0.033300299	0.6622958	0.0709387	0.035427374	0.0059672668	0.043396168	0.16786690
ADF_1	0.0236033572	0.05621467	0.04593486	0.012090087	0.06544033	0.3150012	0.08629833	0.0116866774	0.08195572	0.06765746	0.03035829	0.05823194	0.1805459	0.011023771	0.4819298	0.0873566	0.022989582	0.2816185621	0.018349992	0.09284643
ADF_2	0.0536112630	0.03782103	0.02898501	0.004098576	0.06986312	0.3393563	0.06499569	0.0203178920	0.14664038	0.03989760	0.21384748	0.08540410	0.2035321	0.004017947	0.2112461	0.0691128	0.009266815	0.0579556066	0.010891483	0.03425927
ADF_3	0.0400585565	0.04740052	0.02190356	0.030148471	0.05961051	0.3115098	0.07153495	0.0081500756	0.12759800	0.07993328	0.31230144	0.05618484	0.6637259	0.005502541	0.2924168	0.0684978	0.008844386	0.0740686521	0.018554858	0.04818681
ADF_4	0.0494482300	0.02977943	0.05240536	0.027500146	0.06863938	0.3033208	0.08702404	0.0141776379	0.18841370	0.02179365	0.17800437	0.04184294	0.2027683	0.013223349	0.4468084	0.0678784	0.016123530	0.0521780836	0.020913799	0.07418249
ADF_5	0.0145001726	0.04291936	0.04643352	0.015661221	0.04971629	0.5206007	0.06622372	0.0156904887	0.08942604	0.06498705	0.08117098	0.05390216	0.4606412	0.025817174	0.5815978	0.0611659	0.034926397	0.0954878566	0.032467554	0.16090752
